# Supplementary material for: A single natural RNA modification can destabilize a U•A-T-rich RNA•DNA-DNA triple helix
Source: RNA. 2022 Sep;28(9):1172–84. doi: 10.1261/rna.079244.122 (PMC9380742; doi:10.1261/rna.079244.122)
Supplement: Supplemental Material [file supp_079244.122_Supplemental_File_S1_lncRNA_candidates.xlsx]

## Sheet: Best Candidates
Modification Type	Chromosome Position	Source	Species	Gene	Genetic Variant(s)	SNP Position	Database	Transcriptome Regulation	Disease	Nucleotide Ref Seq
2'-O-Me	chr15:38647279(+)	RiboMeth-seq (High)	Human	LINC02694	rs1246887882	chr15:38647279..38647279	dbSNP153			GAGCACTCAGTAAATATTAATTGGATCCAAGGAAGGCATCTATATTATGTTTCTTTTTCTTTTTA
2'-O-Me	chr20:49278975(+)	Nm-seq (High)	Human	ZFAS1,SNORD12C	rs1171368468	chr20:49278975..49278975	dbSNP153	RBP 25		GGTGTAAATGATGACTTCACTTTTTTCCCCATCAGATCGACAATGCTGACGTCTTATATTTTGCC
2'-O-Me	chr1:93847655(+)	Nm-seq (High)	Human	AL049796.1	-	chr1:93847655..93847655	ICGC	RBP 25		TTCAAAGGTTCCGGGTTCGAGTCCCGGCGGAGTCGTAACGCTTTTTTCCCTCCCCCCTACAATTT
2'-O-Me	chr20:49278975(+)	Nm-seq (High)	Human	ZFAS1,SNORD12C	-	chr20:49278975..49278975	TCGA,ICGC	RBP 25		GGTGTAAATGATGACTTCACTTTTTTCCCCATCAGATCGACAATGCTGACGTCTTATATTTTGCC
pseudouridine	chr17:29394166(+)	CeU-seq (High)	Human	AC068025.2,TAOK1	rs910271522	chr17:29394166..29394166	dbSNP153	circRNA 5		TTTTAATAATTTGCCAGTTTTTTTTTTTTTTTTTTTTTTTTTTTTTTTTTGAGACGGAGTCTTGC
pseudouridine	chr1:161422100(-)	DM-Ψ-seq (High)	Human	AL592295.3	rs900500297	chr1:161422100..161422100	dbSNP153	RBP 15		TTTCACCGCCGCGGCCCGGGTTCGATTCCCGGTCAGGGAAGTTTGCTTTTTTCCTTTCTGATATC
pseudouridine	chr1:161422100(-)	DM-Ψ-seq (High)	Human	AL592295.3	rs900500297	chr1:161422100..161422100	dbSNP153	RBP 15		TTTCACCGCCGCGGCCCGGGTTCGATTCCCGGTCAGGGAAGTTTGCTTTTTTCCTTTCTGATATC
pseudouridine	chr1:93847638(+)	DM-Ψ-seq (High)	Human	AL049796.1	rs1557710113	chr1:93847638..93847638	dbSNP153	RBP 25		TCTAGAGGCTGAAGGCATTCAAAGGTTCCGGGTTCGAGTCCCGGCGGAGTCGTAACGCTTTTTTC
pseudouridine	chr7:141003085(+)	CeU-seq (High)	Human	lnc-TMEM178B-3	rs528321266	chr7:141003085..141003085	dbSNP153			ATAATCAGTAAGTACACTGTATCACAAACCCATGACTTTTGAATCTAAAACCCAGTCTTTTTACT
m5C	chr1:147270935(+)	BS-Seq (High)	Human	CHD1L,AC242426.2	rs782725787	chr1:147270935..147270935	dbSNP153	RBP 5 Splice 21 circRNA 18		GCAGTGTTTCCTTTTCTTTTTCTTGCCAGGGGCCATCGGGTTTTACTTTTCTCCCAAATGACCCA
m5C	chr5:112160882(+)	BS-Seq (High)	Human	EPB41L4A-AS1	rs866671475	chr5:112160882..112160882	dbSNP153	RBP 8 miRNA 1		GGACGGAAGCCTGTCCTTTCTTCCTTTTGGTGCGAGCTTGCTGTGGTTTTTGCTCTGGGTCCTCT
m5C	chr5:112160882(+)	BS-Seq (High)	Human	EPB41L4A-AS1	rs866671475	chr5:112160882..112160882	dbSNP153	RBP 8 miRNA 1		GGACGGAAGCCTGTCCTTTCTTCCTTTTGGTGCGAGCTTGCTGTGGTTTTTGCTCTGGGTCCTCT
m5C	chr6:26286585(+)	miCLIP (High)	Human	tRNA-iMet-CAT-1-1,TRX-CAT1-1,lnc-HIST1H2BI-2,lnc-HIST1H2BI-2:2,lnc-HIST1H2BI-2:3,lnc-HIST1H2BI-2:4	rs1282709415	chr6:26286585..26286585	dbSNP153	RBP 10		GGGCCCATAACCCAGAGGTCGATGGATCGAAACCATCCTCTGCTAGGTCCTTTTTTTTTCTCCCC
m5C	chr6:26286585(+)	miCLIP (High)	Human	tRNA-iMet-CAT-1-1,TRX-CAT1-1,lnc-HIST1H2BI-2,lnc-HIST1H2BI-2:2,lnc-HIST1H2BI-2:3,lnc-HIST1H2BI-2:4	rs1282709415	chr6:26286585..26286585	ICGC	RBP 10		GGGCCCATAACCCAGAGGTCGATGGATCGAAACCATCCTCTGCTAGGTCCTTTTTTTTTCTCCCC
m5C	chr9:84604294(+)	BS-Seq (High)	Human	AL157886.1	rs1211683816	chr9:84604293..84604294	dbSNP153			GACATTTCTTTTCTGCTTTTATTTTTCTTCCTCTTTTTTTCTTATTTCTTTTTTTCTTTCTTTTT
m5C	chr9:84604294(+)	BS-Seq (High)	Human	AL157886.1	rs925453889	chr9:84604294..84604294	dbSNP153			GACATTTCTTTTCTGCTTTTATTTTTCTTCCTCTTTTTTTCTTATTTCTTTTTTTCTTTCTTTTT
m5C	chr9:84604327(+)	BS-Seq (High)	Human	AL157886.1	rs914005533	chr9:84604315..84604327	dbSNP153			TTTTTTTCTTATTTCTTTTTTTCTTTCTTTTTCTCTTTTTTCTCCTCCTCCTCCTCTCCCTACTT
m5C	chr9:84604317(+)	BS-Seq (High)	Human	AL157886.1	rs1397866224	chr9:84604317..84604317	dbSNP153			TTTCTTCCTCTTTTTTTCTTATTTCTTTTTTTCTTTCTTTTTCTCTTTTTTCTCCTCCTCCTCCT
m5C	chr9:84604329(+)	BS-Seq (High)	Human	AL157886.1	rs944005745	chr9:84604329..84604329	dbSNP153			TTTTTCTTATTTCTTTTTTTCTTTCTTTTTCTCTTTTTTCTCCTCCTCCTCCTCTCCCTACTTTC
m5C	chr9:84604338(+)	BS-Seq (High)	Human	AL157886.1	rs1306304664	chr9:84604335..84604338	dbSNP153			TTTCTTTTTTTCTTTCTTTTTCTCTTTTTTCTCCTCCTCCTCCTCTCCCTACTTTCCCTCCTCCT
m5C	chr9:84604336(+)	BS-Seq (High)	Human	AL157886.1	rs1347600302	chr9:84604336..84604336	dbSNP153			TATTTCTTTTTTTCTTTCTTTTTCTCTTTTTTCTCCTCCTCCTCCTCTCCCTACTTTCCCTCCTC
m5C	chr9:84604347(+)	BS-Seq (High)	Human	AL157886.1	rs1461141750	chr9:84604347..84604347	dbSNP153			TTCTTTCTTTTTCTCTTTTTTCTCCTCCTCCTCCTCTCCCTACTTTCCCTCCTCCTCCTTCTTCT
m5C	chr9:84604361(+)	BS-Seq (High)	Human	AL157886.1	rs1486708545	chr9:84604361..84604361	dbSNP153			CTTTTTTCTCCTCCTCCTCCTCTCCCTACTTTCCCTCCTCCTCCTTCTTCTTTTCTTCTTCCTCT
m5C	chr9:84604338(+)	BS-Seq (High)	Human	AL157886.1	-	chr9:84604338..84604338	ICGC			TTTCTTTTTTTCTTTCTTTTTCTCTTTTTTCTCCTCCTCCTCCTCTCCCTACTTTCCCTCCTCCT
m5C	chr9:84604338(+)	BS-Seq (High)	Human	AL157886.1	-	chr9:84604338..84604338	ICGC			TTTCTTTTTTTCTTTCTTTTTCTCTTTTTTCTCCTCCTCCTCCTCTCCCTACTTTCCCTCCTCCT
m5C	chr9:122404679(+)	BS-Seq (High)	Human	AL359636.2	-	chr9:122404679..122404679	ICGC	Splice 1		TTGAACTTTTTTTTTTTTGAGACAGGGTCTTGCTCTGTCATTCCAGCTGGAGTGCAGAGGTGTGT
m5C	chr9:84604344(+)	BS-Seq (High)	Human	AL157886.1	-	chr9:84604344..84604344	ICGC			TTTTTCTTTCTTTTTCTCTTTTTTCTCCTCCTCCTCCTCTCCCTACTTTCCCTCCTCCTCCTTCT
m5C	chr12:53462486(+)	BS-Seq (High)	Human	PCBP2,AC023509.1	rs1311757794	chr12:53462486..53462486	dbSNP153	RBP 13 Splice 19 miRNA 12 circRNA 27		TATCTCTTTTTGTTTTTTTCCCCTCTGACTCTCTCCCAGTCCCCCCCGAAGGGCGTGACCATCCC
m5C	chr12:1929794(-)	BS-Seq (High)	Human	LINC00940	rs948758011	chr12:1929794..1929794	dbSNP153			TTCCCCTTCCTCCTCCTCCTCCCCCTCTTCTTCCTCCTTCTCCTATCCTCTTTTTCTTCCTCAAC
m5C	chr12:1929803(-)	BS-Seq (High)	Human	LINC00940	rs1045702628	chr12:1929801..1929804	dbSNP153			TCCTCCTCCTTCCCCTTCCTCCTCCTCCTCCCCCTCTTCTTCCTCCTTCTCCTATCCTCTTTTTC
m5C	chr12:1929804(-)	BS-Seq (High)	Human	LINC00940	rs1045702628	chr12:1929801..1929804	dbSNP153			TTCCTCCTCCTTCCCCTTCCTCCTCCTCCTCCCCCTCTTCTTCCTCCTTCTCCTATCCTCTTTTT
m5C	chr12:1929804(-)	BS-Seq (High)	Human	LINC00940	rs1045702628	chr12:1929801..1929804	dbSNP153			TTCCTCCTCCTTCCCCTTCCTCCTCCTCCTCCCCCTCTTCTTCCTCCTTCTCCTATCCTCTTTTT
m5C	chr12:53461009(+)	BS-Seq (High)	Human	PCBP2,AC023509.1	-	chr12:53461009..53461009	TCGA	RBP 7 miRNA 4 circRNA 21		TGTTTTTCTCTGATTTTGAATTTCTTTTTACTCCAAAGAGTACAGGGGCTCAGGTCCAGGTGGCA
m5U	chr11:59560354(-)	FICC-Seq&miCLIP (High)	Human	LINC02739	rs1270975080	chr11:59560352..59560352	dbSNP153	RBP 16		GAGCATCAGACTTTTAATCTGAGGGTCCAGGGTT_CAAGTCCCTGTTCGGGCGGTATCTTTTTTT
m5U	chr11:59560354(-)	FICC-Seq&miCLIP (High)	Human	LINC02739	rs983754452	chr11:59560352..59560352	dbSNP153	RBP 16		GAGCATCAGACTTTTAATCTGAGGGTCCAGGGTTCAAGTCCCTGTTCGGGCGGTATCTTTTTTTT
m5U	chr11:59560354(-)	FICC-Seq&miCLIP (High)	Human	LINC02739	rs983754452	chr11:59560352..59560352	dbSNP153	RBP 16		GAGCATCAGACTTTTAATCTGAGGGTCCAGGGTTCAAGTCCCTGTTCGGGCGGTATCTTTTTTTT
m5U	chr11:59560354(-)	FICC-Seq&miCLIP (High)	Human	LINC02739	rs983754452	chr11:59560352..59560352	dbSNP153	RBP 16		GAGCATCAGACTTTTAATCTGAGGGTCCAGGGTTCAAGTCCCTGTTCGGGCGGTATCTTTTTTTT
m5U	chr11:59560354(-)	FICC-Seq&miCLIP (High)	Human	LINC02739	rs1233637961	chr11:59560353..59560353	dbSNP153	RBP 16		GAGCATCAGACTTTTAATCTGAGGGTCCAGGGTTCAAGTCCCTGTTCGGGCGGTATCTTTTTTTT
m5U	chr11:59560354(-)	FICC-Seq&miCLIP (High)	Human	LINC02739	rs1233637961	chr11:59560353..59560353	dbSNP153	RBP 16		GAGCATCAGACTTTTAATCTGAGGGTCCAGGGTTCAAGTCCCTGTTCGGGCGGTATCTTTTTTTT
m5U	chr11:59560354(-)	FICC-Seq&miCLIP (High)	Human	LINC02739	rs892203613	chr11:59560354..59560354	dbSNP153	RBP 16		GAGCATCAGACTTTTAATCTGAGGGTCCAGGGTTCAAGTCCCTGTTCGGGCGGTATCTTTTTTTT
m5U	chr11:59560354(-)	FICC-Seq&miCLIP (High)	Human	LINC02739	rs892203613	chr11:59560354..59560354	dbSNP153	RBP 16		GAGCATCAGACTTTTAATCTGAGGGTCCAGGGTTCAAGTCCCTGTTCGGGCGGTATCTTTTTTTT
m5U	chr11:59560354(-)	FICC-Seq&miCLIP (High)	Human	LINC02739	rs946935800	chr11:59560355..59560355	dbSNP153	RBP 16		GAGCATCAGACTTTTAATCTGAGGGTCCAGGGTTCAAGTCCCTGTTCGGGCGGTATCTTTTTTTT
m5U	chr11:59560354(-)	FICC-Seq&miCLIP (High)	Human	LINC02739	rs946935800	chr11:59560355..59560355	dbSNP153	RBP 16		GAGCATCAGACTTTTAATCTGAGGGTCCAGGGTTCAAGTCCCTGTTCGGGCGGTATCTTTTTTTT
m5U	chr11:59560354(-)	FICC-Seq&miCLIP (High)	Human	LINC02739	rs941730820	chr11:59560356..59560356	dbSNP153	RBP 16		GAGCATCAGACTTTTAATCTGAGGGTCCAGGGTTCAAGTCCCTGTTCGGGCGGTATCTTTTTTTT
m5U	chr11:59560354(-)	FICC-Seq&miCLIP (High)	Human	LINC02739	rs941730820	chr11:59560356..59560356	dbSNP153	RBP 16		GAGCATCAGACTTTTAATCTGAGGGTCCAGGGTTCAAGTCCCTGTTCGGGCGGTATCTTTTTTTT
m5U	chr1:161422112(-)	FICC-Seq&miCLIP (High)	Human	AL592295.3	rs1225146625	chr1:161422110..161422110	dbSNP153	RBP 11		AGGATTCGGCGCTTTCACCGCCGCGGCCCGGGTTCGATTCCCGGTCAGGGAAGTTTGCTTTTTTC
m5U	chr1:161422112(-)	FICC-Seq&miCLIP (High)	Human	AL592295.3	rs1051506486	chr1:161422113..161422113	dbSNP153	RBP 11		AGGATTCGGCGCTTTCACCGCCGCGGCCCGGGTTCGATTCCCGGTCAGGGAAGTTTGCTTTTTTC
m5U	chr1:161422112(-)	FICC-Seq&miCLIP (High)	Human	AL592295.3	rs1051506486	chr1:161422113..161422113	dbSNP153	RBP 11		AGGATTCGGCGCTTTCACCGCCGCGGCCCGGGTTCGATTCCCGGTCAGGGAAGTTTGCTTTTTTC
m5U	chr1:93847638(+)	FICC-Seq&miCLIP (High)	Human	AL049796.1	rs1557710113	chr1:93847638..93847638	dbSNP153	RBP 25		TCTAGAGGCTGAAGGCATTCAAAGGTTCCGGGTTCGAGTCCCGGCGGAGTCGTAACGCTTTTTTC
m5U	chr1:93847638(+)	FICC-Seq&miCLIP (High)	Human	AL049796.1	rs1327127867	chr1:93847640..93847640	dbSNP153	RBP 25		TCTAGAGGCTGAAGGCATTCAAAGGTTCCGGGTTCGAGTCCCGGCGGAGTCGTAACGCTTTTTTC
m5U	chr12:124927857(-)	FICC-Seq&miCLIP (High)	Human	TRF-GAA1-1,TRF-GAA1-1:2,piR-43773,TRF-GAA1-1:3,TRF-GAA1-1:4,lnc-UBC-3,tRNA-Phe-GAA-1-3	rs1006153142	chr12:124927857..124927857	dbSNP153	RBP 24		TTAGACTGAAGATCTAAAGGTCCCTGGTTCGATCCCGGGTTTCGGCACTTCCTCTTTTTCCTTCC
m5U	chr12:124927862(-)	FICC-Seq&miCLIP (High)	Human	TRF-GAA1-1,TRF-GAA1-1:2,piR-43773,TRF-GAA1-1:3,TRF-GAA1-1:4,lnc-UBC-3,tRNA-Phe-GAA-1-3	rs1258862808	chr12:124927862..124927862	dbSNP153	RBP 24		GAGCGTTAGACTGAAGATCTAAAGGTCCCTGGTTCGATCCCGGGTTTCGGCACTTCCTCTTTTTC
m5U	chr1:161422107(-)	FICC-Seq (High)	Human	AL592295.3	rs1210461524	chr1:161422107..161422107	dbSNP153	RBP 15		TCGGCGCTTTCACCGCCGCGGCCCGGGTTCGATTCCCGGTCAGGGAAGTTTGCTTTTTTCCTTTC
m5U	chr1:161422112(-)	FICC-Seq&miCLIP (High)	Human	AL592295.3	rs1480987422	chr1:161422107..161422113	dbSNP153	RBP 11		AGGATTCGGCGCTTTCACCGCCGCGGCCCGGGTTCGATTCCCGGTCAGGGAAGTTTGCTTTTTTC
m5U	chr1:161531170(+)	FICC-Seq&miCLIP (High)	Human	AL590385.2	rs1436615688	chr1:161531170..161531170	dbSNP153	RBP 18 circRNA 2		AGCTGCCTTCCAAGCAGTTGACCCGGGTTCGATTCCCGGCCAACGCAAGGGTTTTTGTCTTTCCT
m5U	chr11:59560354(-)	FICC-Seq&miCLIP (High)	Human	LINC02739	rs892203613	chr11:59560354..59560354	dbSNP153	RBP 16		GAGCATCAGACTTTTAATCTGAGGGTCCAGGGTTCAAGTCCCTGTTCGGGCGGTATCTTTTTTTT
m5U	chr11:59560354(-)	FICC-Seq&miCLIP (High)	Human	LINC02739	rs892203613	chr11:59560354..59560354	dbSNP153	RBP 16		GAGCATCAGACTTTTAATCTGAGGGTCCAGGGTTCAAGTCCCTGTTCGGGCGGTATCTTTTTTTT

## Sheet: Nm
Modification Type	Chromosome Position	Source	Species	Gene	Genetic Variant(s)	SNP Position	Database	Transcriptome Regulation	Disease	Nucleotide Ref Seq	Nucleotide Alt Seq
2'-O-Me	chr10:17252339(-)	RiboMeth-seq (High)	Human	HSALNG0076438	rs1287319598	chr10:17252339..17252339	dbSNP153			AATGAGCAGCCTTGATTCATTGGCCATAACATCCAAGGAAGGACTCTGCAGCAGGTCCAGCCCAT	AATGAGCAGCCTTGATTCATTGGCCATAACATTCAAGGAAGGACTCTGCAGCAGGTCCAGCCCAT
2'-O-Me	chr10:62648220(+)	RiboMeth-seq (High)	Human	AC067752.1,AC024598.1	rs1388451786	chr10:62648220..62648220	dbSNP153	circRNA 1		GGCATTCAATAAATATTTATGGCAGCAATGAATGGATGAACGAATAGAAAACATCTCAAAGGGTG	GGCATTCAATAAATATTTATGGCAGCAATGAAAGGATGAACGAATAGAAAACATCTCAAAGGGTG
2'-O-Me	chr10:94590774(+)	Nm-seq (High)	Human	HELLS,AL138759.1	rs140653245	chr10:94590774..94590774	dbSNP153	RBP 4 Splice 7 circRNA 15		AATATCCTATAGACCCTGTTACACAAGAATTTAAGGTGAATACTGTTTAATTCTAATTTACTGTT	AATATCCTATAGACCCTGTTACACAAGAATTTCAGGTGAATACTGTTTAATTCTAATTTACTGTT
2'-O-Me	chr11:1997559(-)	Nm-seq (High)	Human	H19	rs775164165	chr11:1997559..1997559	dbSNP153	RBP 1 miRNA 6 circRNA 4		GCTGGGGACGATGGGCCTGAGCTAGGGCTGGAAAGAAGGGGGAGCCAGGCATTCATCCCGGTCAC	GCTGGGGACGATGGGCCTGAGCTAGGGCTGGAGAGAAGGGGGAGCCAGGCATTCATCCCGGTCAC
2'-O-Me	chr11:111821448(-)	Nm-seq (High)	Human	AP001781.2,ALG9-IT1,ALG9	rs1287726422	chr11:111821448..111821448	dbSNP153	RBP 24 circRNA 8		CATTGGGAAAAGAAGACCCTGTCGAGCTTGACTCTAGTCTGGCATGGTAGAGAGACATGAGAAAT	CATTGGGAAAAGAAGACCCTGTCGAGCTTGACACTAGTCTGGCATGGTAGAGAGACATGAGAAAT
2'-O-Me	chr11:59537781(+)	Nm-seq (High)	Human	lnc-OR4D9-1-001	rs779037672	chr11:59537781..59537781	dbSNP153			GTTTCTTAGAAGTGGACACGTGAACTCTTACACAGATCAAGAGGAGCAGCTCTGTAAATATTTCC	GTTTCTTAGAAGTGGACACGTGAACTCTTACATAGATCAAGAGGAGCAGCTCTGTAAATATTTCC
2'-O-Me	chr11:62841720(+)	Nm-seq (High)	Human	lnc-SLC3A2-6	rs897060843	chr11:62841720..62841720	dbSNP153			ATTCCATCTCCTATTTCCAAAAATCCATTTAATATATTGTCCTCGGATAGAGGACGTATCAGATA	ATTCCATCTCCTATTTCCAAAAATCCATTTAACATATTGTCCTCGGATAGAGGACGTATCAGATA
2'-O-Me	chr11:62852937(-)	Nm-seq (High)	Human	SNHG1,SNORD22	rs1326069934	chr11:62852937..62852937	dbSNP153	RBP 24 Splice 2 circRNA 16		CACTGGGACTGGCTGGGGGAGAAGAGGAAGATTTGTTCCAGAAGGAACTGTCTGAGGGATGATAA	CACTGGGACTGGCTGGGGGAGAAGAGGAAGATGTGTTCCAGAAGGAACTGTCTGAGGGATGATAA
2'-O-Me	chr11:62852951(-)	Nm-seq (High)	Human	SNHG1,SNORD22	rs765673930	chr11:62852951..62852951	dbSNP153	RBP 24 Splice 2 miRNA 1 circRNA 16		TGTAAAGGTGAACCCACTGGGACTGGCTGGGGGAGAAGAGGAAGATTTGTTCCAGAAGGAACTGT	TGTAAAGGTGAACCCACTGGGACTGGCTGGGGTAGAAGAGGAAGATTTGTTCCAGAAGGAACTGT
2'-O-Me	chr11:62852951(-)	Nm-seq (High)	Human	SNHG1,SNORD22	rs765673930	chr11:62852951..62852951	dbSNP153	RBP 24 Splice 2 miRNA 1 circRNA 16		TGTAAAGGTGAACCCACTGGGACTGGCTGGGGGAGAAGAGGAAGATTTGTTCCAGAAGGAACTGT	TGTAAAGGTGAACCCACTGGGACTGGCTGGGGCAGAAGAGGAAGATTTGTTCCAGAAGGAACTGT
2'-O-Me	chr11:62853679(-)	Nm-seq (High)	Human	SNHG1,SNORD30	rs375886538	chr11:62853679..62853679	dbSNP153	RBP 25 circRNA 28		ATCTCGTTCGGCTGATGACTTGCTGTTGAGACTCTGAAATCTGATTTTCTGAGAATGATGGGTGG	ATCTCGTTCGGCTGATGACTTGCTGTTGAGACCCTGAAATCTGATTTTCTGAGAATGATGGGTGG
2'-O-Me	chr11:62855301(-)	Nm-seq (High)	Human	SNORD26,SNHG1	rs199533999	chr11:62855301..62855301	dbSNP153	RBP 25 circRNA 22		TTTCTGATGGATTAGTGGAGAAAACAGAAAATTCTGAGTAGCACTGTACTGTACGCAACAAATGT	TTTCTGATGGATTAGTGGAGAAAACAGAAAATCCTGAGTAGCACTGTACTGTACGCAACAAATGT
2'-O-Me	chr11:65499677(+)	Nm-seq (High)	Human	MALAT1	rs894923111	chr11:65499677..65499677	dbSNP153	RBP 24 Splice 1 circRNA 3		ATAGAAGTTTGAAGTGGAAAACTGGAAGACAGAAGTACGGGAAGGCGAAGAAAAGAATAGAGAAG	ATAGAAGTTTGAAGTGGAAAACTGGAAGACAGCAGTACGGGAAGGCGAAGAAAAGAATAGAGAAG
2'-O-Me	chr11:72018254(+)	Nm-seq (High)	Human	AP002490.1	rs764678348	chr11:72018254..72018254	dbSNP153	Splice 1		GATTTTGCGATCCATCTGGCTCTTCTCTGTCTTCAGGTCCTGGCACTGCTTCAGGGTTTCATGCA	GATTTTGCGATCCATCTGGCTCTTCTCTGTCTCCAGGTCCTGGCACTGCTTCAGGGTTTCATGCA
2'-O-Me	chr12:122981208(+)	Nm-seq (High)	Human	ARL6IP4,AC026362.1	rs1286369699	chr12:122981206..122981208	dbSNP153	RBP 7 Splice 21 circRNA 6		CGCAGCCGGTCCCGGGGACGGGGGTCGGAAAAGAGAAAGAAGAAGAGCAGGAAAGACACCTCGAG	CGCAGCCGGTCCCGGGGACGGGGGTCGGAAA__AGAAAGAAGAAGAGCAGGAAAGACACCTCGAG
2'-O-Me	chr12:122981208(+)	Nm-seq (High)	Human	ARL6IP4,AC026362.1	rs1356257192	chr12:122981208..122981208	dbSNP153	RBP 7 Splice 21 circRNA 6		CGCAGCCGGTCCCGGGGACGGGGGTCGGAAAAGAGAAAGAAGAAGAGCAGGAAAGACACCTCGAG	CGCAGCCGGTCCCGGGGACGGGGGTCGGAAAAAAGAAAGAAGAAGAGCAGGAAAGACACCTCGAG
2'-O-Me	chr12:122981789(+)	Nm-seq (High)	Human	ARL6IP4,AC026362.1	rs1478814322	chr12:122981786..122981789	dbSNP153	RBP 13 Splice 20 circRNA 6		AGAAGAGGAAGAAGCTGAAGAAGAAGGGCAAGGAGAAGGCGGAAGCACAGCAGGTGGAGGCTCTG	AGAAGAGGAAGAAGCTGAAGAAGAAGGGCA___AGAAGGCGGAAGCACAGCAGGTGGAGGCTCTG
2'-O-Me	chr12:122982527(+)	Nm-seq (High)	Human	ARL6IP4,AC026362.1	rs766518769	chr12:122982523..122982527	dbSNP153	RBP 6 Splice 21 circRNA 10		TAGAGGAAATCGTAACCAAAGAACGACACAGAGAGATCAACAAGGTGGGTGTGGCCCCTCTGCCT	TAGAGGAAATCGTAACCAAAGAACGACAC____AGATCAACAAGGTGGGTGTGGCCCCTCTGCCT
2'-O-Me	chr12:127166069(+)	Nm-seq (High)	Human	AC079949.3	rs1021523770	chr12:127166069..127166069	dbSNP153			GTTGCGTGACGGGCGAGAGGGCGGCCGCCTTTCCGGCCGCGCCCCGTTTCCCAGGACAAAGGGCA	GTTGCGTGACGGGCGAGAGGGCGGCCGCCTTTGCGGCCGCGCCCCGTTTCCCAGGACAAAGGGCA
2'-O-Me	chr12:98503575(-)	Nm-seq (High)	Human	LINC02453	rs1033463462	chr12:98503575..98503575	dbSNP153			AATAACTGTCGCCAAAAAAGTGCAGCTACACACCTCCCCGTCGGGGAATTGAACCCCGGTCTCCC	AATAACTGTCGCCAAAAAAGTGCAGCTACACATCTCCCCGTCGGGGAATTGAACCCCGGTCTCCC
2'-O-Me	chr13:30893604(-)	RiboMeth-seq (High)	Human	TEX26-AS1	rs900883753	chr13:30893604..30893604	dbSNP153			ACTCACTAAGTCACACACTTGGGAGCCATTGGGGGTGGTGTAGGATAAAGGTATTTTCTGAGCAT	ACTCACTAAGTCACACACTTGGGAGCCATTGGAGGTGGTGTAGGATAAAGGTATTTTCTGAGCAT
2'-O-Me	chr14:20343324(-)	Nm-seq (High)	Human	AL355075.4,RPPH1	rs1413697254	chr14:20343324..20343324	dbSNP153	RBP 25 miRNA 19 circRNA 21		CCACTCCCATGTCCCTTGGGAAGGTCTGAGACTAGGGCCAGAGGCGGCCCTAACAGGGCTCTCCC	CCACTCCCATGTCCCTTGGGAAGGTCTGAGACGAGGGCCAGAGGCGGCCCTAACAGGGCTCTCCC
2'-O-Me	chr14:20343324(-)	Nm-seq (High)	Human	AL355075.4,RPPH1	rs1413697254	chr14:20343324..20343324	dbSNP153	RBP 25 miRNA 19 circRNA 21		CCACTCCCATGTCCCTTGGGAAGGTCTGAGACTAGGGCCAGAGGCGGCCCTAACAGGGCTCTCCC	CCACTCCCATGTCCCTTGGGAAGGTCTGAGACCAGGGCCAGAGGCGGCCCTAACAGGGCTCTCCC
2'-O-Me	chr14:76783329(-)	Nm-seq (High)	Human	VASH1-AS1	rs915799068	chr14:76783329..76783329	dbSNP153			TCTCCTTTGCTCCTGATGGACTGCTGTGGACTGAGACTGGAAGAGCAGGGTCCTGGAATACATCC	TCTCCTTTGCTCCTGATGGACTGCTGTGGACTAAGACTGGAAGAGCAGGGTCCTGGAATACATCC
2'-O-Me	chr15:25107586(+)	Nm-seq (High)	Human	SNHG14	rs560526694	chr15:25107586..25107586	dbSNP153	RBP 2 Splice 21 circRNA 28		TCCCTGGGGGCAGAACAAAAGGACGCACTCCAAAGGTAACATCCAAGTTTGAATAAATTTACTTT	TCCCTGGGGGCAGAACAAAAGGACGCACTCCATAGGTAACATCCAAGTTTGAATAAATTTACTTT
2'-O-Me	chr15:38647279(+)	RiboMeth-seq (High)	Human	LINC02694	rs1246887882	chr15:38647279..38647279	dbSNP153			GAGCACTCAGTAAATATTAATTGGATCCAAGGAAGGCATCTATATTATGTTTCTTTTTCTTTTTA	GAGCACTCAGTAAATATTAATTGGATCCAAGGGAGGCATCTATATTATGTTTCTTTTTCTTTTTA
2'-O-Me	chr15:89335146(+)	Nm-seq (High)	Human	AC124068.2	rs6496572	chr15:89335146..89335146	dbSNP153	RBP 24	GWAS_ID_1	GAAGATTGCAGGTTCGAGTCCTGCCGCGGTCGAAGGGAGGTTATGATTAACTTTTAGTTTATTCC	GAAGATTGCAGGTTCGAGTCCTGCCGCGGTCGCAGGGAGGTTATGATTAACTTTTAGTTTATTCC
2'-O-Me	chr15:89335146(+)	Nm-seq (High)	Human	AC124068.2	rs6496572	chr15:89335146..89335146	dbSNP153	RBP 24	GWAS_ID_1	GAAGATTGCAGGTTCGAGTCCTGCCGCGGTCGAAGGGAGGTTATGATTAACTTTTAGTTTATTCC	GAAGATTGCAGGTTCGAGTCCTGCCGCGGTCGGAGGGAGGTTATGATTAACTTTTAGTTTATTCC
2'-O-Me	chr15:89335146(+)	Nm-seq (High)	Human	AC124068.2	rs6496572	chr15:89335146..89335146	dbSNP153	RBP 24	GWAS_ID_1	GAAGATTGCAGGTTCGAGTCCTGCCGCGGTCGAAGGGAGGTTATGATTAACTTTTAGTTTATTCC	GAAGATTGCAGGTTCGAGTCCTGCCGCGGTCGTAGGGAGGTTATGATTAACTTTTAGTTTATTCC
2'-O-Me	chr16:9108726(+)	Nm-seq (High)	Human	C16orf72,AC087190.3	rs748375474	chr16:9108726..9108726	dbSNP153	RBP 12		AAGGTGAATGACCAACTGTATCCCTGGTTCACTGGTTAGGAAGAGTACATAGTCTTTGTGTATAG	AAGGTGAATGACCAACTGTATCCCTGGTTCACGGGTTAGGAAGAGTACATAGTCTTTGTGTATAG
2'-O-Me	chr16:29810865(+)	Nm-seq (High)	Human	MAZ,AC009133.5	rs1436115259	chr16:29810865..29810865	dbSNP153	RBP 24 miRNA 1		GAGAATCTGTCAGGGGAAAAAGTCAAGGGGAGCAGGAGGAAGAGCCAGGAGGGCCAGAGGCAGAG	GAGAATCTGTCAGGGGAAAAAGTCAAGGGGAGAAGGAGGAAGAGCCAGGAGGGCCAGAGGCAGAG
2'-O-Me	chr16:34160959(+)	RiboMeth-seq (High)	Human	RF01960-006,RF01960-006:2,lnc-TP53TG3F-20,RF01960-006:3,RF01960-006:4,RF01960-006:5,RF01960-006:6,RF01960-006:7,lnc-TP53TG3F-20:2,RF01960-006:8,RF01960-006:9,RF01960-006:10	rs112719146	chr16:34160959..34160959	dbSNP153	RBP 24		TATGGAACTGAGGCCATGATTAAGAGGGACAGCTGGGGGCATTTGTATTGCACCGCTAGAGGTGA	TATGGAACTGAGGCCATGATTAAGAGGGACAGGTGGGGGCATTTGTATTGCACCGCTAGAGGTGA
2'-O-Me	chr16:34161325(+)	RiboMeth-seq (High)	Human	RF01960-006,RF01960-006:2,lnc-TP53TG3F-20,RF01960-006:3,RF01960-006:4,RF01960-006:5,RF01960-006:6,RF01960-006:7,RF01960-006:8,RF01960-006:9,RF01960-006:10	rs911849617	chr16:34161325..34161325	dbSNP153	RBP 4		GGAAAAATCCCCCGGGCCGGACAGGGACAGGATTGACAGATTGATAGCTGTTTCTCTGTTCCATG	GGAAAAATCCCCCGGGCCGGACAGGGACAGGACTGACAGATTGATAGCTGTTTCTCTGTTCCATG
2'-O-Me	chr16:72200876(-)	RiboMeth-seq (High)	Human	HSALNG0112544	rs1188796541	chr16:72200876..72200876	dbSNP153			TCCCTTTCTCCCCTGGCAGCACTGGACCAGGTGTCCTAAGATCTAGATCCTGTCCTTACTCTGTG	TCCCTTTCTCCCCTGGCAGCACTGGACCAGGTATCCTAAGATCTAGATCCTGTCCTTACTCTGTG
2'-O-Me	chr16:88738931(+)	Nm-seq (High)	Human	AC138028.2	rs909553080	chr16:88738931..88738931	dbSNP153			AGGTCTGCCTGACACCTTCCTACTTCCTCACTCAAGCTCACAGTTCCTGCAGGCCTTCCTGGTAG	AGGTCTGCCTGACACCTTCCTACTTCCTCACTGAAGCTCACAGTTCCTGCAGGCCTTCCTGGTAG
2'-O-Me	chr16:88738931(+)	Nm-seq (High)	Human	AC138028.2	rs909553080	chr16:88738931..88738931	dbSNP153			AGGTCTGCCTGACACCTTCCTACTTCCTCACTCAAGCTCACAGTTCCTGCAGGCCTTCCTGGTAG	AGGTCTGCCTGACACCTTCCTACTTCCTCACTTAAGCTCACAGTTCCTGCAGGCCTTCCTGGTAG
2'-O-Me	chr17:7574829(+)	Nm-seq (High)	Human	SNORA48,SENP3-EIF4A1,EIF4A1,AC016876.3	rs760619703	chr17:7574829..7574829	dbSNP153	RBP 25 circRNA 15		AGCTTGGCTTTTGATCCGTGCCCATGCCTGGTTCATGCCTTGGACACATAGGTTTCCTTTAAAGA	AGCTTGGCTTTTGATCCGTGCCCATGCCTGGTACATGCCTTGGACACATAGGTTTCCTTTAAAGA
2'-O-Me	chr17:7574829(+)	Nm-seq (High)	Human	SNORA48,SENP3-EIF4A1,EIF4A1,AC016876.3	rs760619703	chr17:7574829..7574829	dbSNP153	RBP 25 circRNA 15		AGCTTGGCTTTTGATCCGTGCCCATGCCTGGTTCATGCCTTGGACACATAGGTTTCCTTTAAAGA	AGCTTGGCTTTTGATCCGTGCCCATGCCTGGTGCATGCCTTGGACACATAGGTTTCCTTTAAAGA
2'-O-Me	chr17:16440100(+)	Nm-seq (High)	Human	SNORD49A,SNHG29	rs771100512	chr17:16440096..16440100	dbSNP153	RBP 24 circRNA 4		TCAGAAGCGATAACTGACGAAGACTACTCCTGTCTGATTGCAGTCAAGTCTTCACCACTTGCTGG	TCAGAAGCGATAACTGACGAAGACTACTC____CTGATTGCAGTCAAGTCTTCACCACTTGCTGG
2'-O-Me	chr17:16441495(+)	Nm-seq (High)	Human	SNHG29	rs917838619	chr17:16441495..16441495	dbSNP153	RBP 14 miRNA 3 circRNA 4		TGCTTGCCTTATGTATCAGAGGACATGCTCAGCAGATCCAAGAGATATATTTGGCAACTTTTTCT	TGCTTGCCTTATGTATCAGAGGACATGCTCAGGAGATCCAAGAGATATATTTGGCAACTTTTTCT
2'-O-Me	chr17:16441495(+)	Nm-seq (High)	Human	SNHG29	rs917838619	chr17:16441495..16441495	dbSNP153	RBP 14 miRNA 3 circRNA 4		TGCTTGCCTTATGTATCAGAGGACATGCTCAGCAGATCCAAGAGATATATTTGGCAACTTTTTCT	TGCTTGCCTTATGTATCAGAGGACATGCTCAGTAGATCCAAGAGATATATTTGGCAACTTTTTCT
2'-O-Me	chr17:19112497(-)	RiboMeth-seq (High)	Human	AC007952.4,SNORD3D,SNORD3D:2	rs758948237	chr17:19112484..19112498	dbSNP153	RBP 2		GCGTGAAGCCGGCTTTCTGGCGTTGCTTGGCTGCAACTGCCGTCAGCCATTGATGATCGTTCTTC	GCGTGAAGCCGGCTTTCTGGCGTTGCTTGGC______________GCCATTGATGATCGTTCTTC
2'-O-Me	chr17:19112497(-)	RiboMeth-seq (High)	Human	AC007952.4,SNORD3D,SNORD3D:2	rs780911938	chr17:19112497..19112497	dbSNP153	RBP 2		GCGTGAAGCCGGCTTTCTGGCGTTGCTTGGCTGCAACTGCCGTCAGCCATTGATGATCGTTCTTC	GCGTGAAGCCGGCTTTCTGGCGTTGCTTGGCTCCAACTGCCGTCAGCCATTGATGATCGTTCTTC
2'-O-Me	chr17:19112497(-)	RiboMeth-seq (High)	Human	AC007952.4,SNORD3D,SNORD3D:2	rs780911938	chr17:19112497..19112497	dbSNP153	RBP 2		GCGTGAAGCCGGCTTTCTGGCGTTGCTTGGCTGCAACTGCCGTCAGCCATTGATGATCGTTCTTC	GCGTGAAGCCGGCTTTCTGGCGTTGCTTGGCTACAACTGCCGTCAGCCATTGATGATCGTTCTTC
2'-O-Me	chr17:19112531(-)	RiboMeth-seq (High)	Human	AC007952.4,SNORD3D,SNORD3D:2	rs778799342	chr17:19112531..19112531	dbSNP153	RBP 1 miRNA 1		AACCCCGAGGAAGAGAGGTAGCGTTTTCTCCTGAGCGTGAAGCCGGCTTTCTGGCGTTGCTTGGC	AACCCCGAGGAAGAGAGGTAGCGTTTTCTCCTTAGCGTGAAGCCGGCTTTCTGGCGTTGCTTGGC
2'-O-Me	chr17:19112531(-)	RiboMeth-seq (High)	Human	AC007952.4,SNORD3D,SNORD3D:2	rs778799342	chr17:19112531..19112531	dbSNP153	RBP 1 miRNA 1		AACCCCGAGGAAGAGAGGTAGCGTTTTCTCCTGAGCGTGAAGCCGGCTTTCTGGCGTTGCTTGGC	AACCCCGAGGAAGAGAGGTAGCGTTTTCTCCTCAGCGTGAAGCCGGCTTTCTGGCGTTGCTTGGC
2'-O-Me	chr17:19112531(-)	RiboMeth-seq (High)	Human	AC007952.4,SNORD3D,SNORD3D:2	rs778799342	chr17:19112531..19112531	dbSNP153	RBP 1 miRNA 1		AACCCCGAGGAAGAGAGGTAGCGTTTTCTCCTGAGCGTGAAGCCGGCTTTCTGGCGTTGCTTGGC	AACCCCGAGGAAGAGAGGTAGCGTTTTCTCCTAAGCGTGAAGCCGGCTTTCTGGCGTTGCTTGGC
2'-O-Me	chr17:20231823(+)	Nm-seq (High)	Human	SPECC1,AC004702.1	rs756942409	chr17:20231823..20231823	dbSNP153	RBP 4 Splice 21 circRNA 27		ACCTGGAGAGGCAGCTGAAGACTCTGACCAAGCAGATGAAGGTGAGATGCGGGTGGGAGCCTTCA	ACCTGGAGAGGCAGCTGAAGACTCTGACCAAGGAGATGAAGGTGAGATGCGGGTGGGAGCCTTCA
2'-O-Me	chr17:21532385(-)	Nm-seq (High)	Human	LINC02693	rs1555574699	chr17:21532385..21532385	dbSNP153	RBP 3 circRNA 1		TGAGGTTTAAGGGATGAGCCTCGGTGATGAGACAGACGGGAGAGGGCACCCTAGGAAAAGCGTCT	TGAGGTTTAAGGGATGAGCCTCGGTGATGAGATAGACGGGAGAGGGCACCCTAGGAAAAGCGTCT
2'-O-Me	chr17:51480044(+)	RiboMeth-seq (High)	Human	LINC02073	rs1567747011	chr17:51480044..51480044	dbSNP153	RBP 7		TAAAAAATAAATTAAATACATTATAAAAAGGGGGGCCTACAGTCTGACCATCCTACAGTCTGACC	TAAAAAATAAATTAAATACATTATAAAAAGGGAGGCCTACAGTCTGACCATCCTACAGTCTGACC
2'-O-Me	chr17:76561677(+)	Nm-seq (High)	Human	SNORD1A,SNHG16	rs1289504686	chr17:76561659..76561677	dbSNP153	RBP 25 miRNA 1 circRNA 6		ATGGTTAGTTATCCCTGTCTGAAAATCTGGACTGAGGGAAATAATCTATTCTGAGGCTTAAGGGT	ATGGTTAGTTATCCC__________________GAGGGAAATAATCTATTCTGAGGCTTAAGGGT
2'-O-Me	chr17:76561677(+)	Nm-seq (High)	Human	SNORD1A,SNHG16	rs761212806	chr17:76561663..76561678	dbSNP153	RBP 25 miRNA 1 circRNA 6		ATGGTTAGTTATCCCTGTCTGAAAATCTGGACTGAGGGAAATAATCTATTCTGAGGCTTAAGGGT	ATGGTTAGTTATCCCTGTC_______________AGGGAAATAATCTATTCTGAGGCTTAAGGGT
2'-O-Me	chr17:78379195(-)	RiboMeth-seq (High)	Human	lnc-SOCS3-3	rs1047571947	chr17:78379195..78379195	dbSNP153			CCCCTCTGAACTCTCCGACACTCACATCCTGGGGCCGAAACCATGATATAAACAGCCTCTGGAGC	CCCCTCTGAACTCTCCGACACTCACATCCTGGAGCCGAAACCATGATATAAACAGCCTCTGGAGC
2'-O-Me	chr19:15308141(+)	RiboMeth-seq (High)	Human	lnc-OR7C2-1,lnc-OR7C2-1:2	rs1273122500	chr19:15308136..15308142	dbSNP153			CCGTCTCAAAAAAAAAAAAAAAAAAAAAGTTGCGGGGCCGGGGGGGGGGGGGGGGGTGGGTCGCG	CCGTCTCAAAAAAAAAAAAAAAAAAAAA______GGGCCGGGGGGGGGGGGGGGGGTGGGTCGCG
2'-O-Me	chr19:15308141(+)	RiboMeth-seq (High)	Human	lnc-OR7C2-1,lnc-OR7C2-1:2	rs1352998119	chr19:15308136..15308141	dbSNP153			CCGTCTCAAAAAAAAAAAAAAAAAAAAAGTTGCGGGGCCGGGGGGGGGGGGGGGGGTGGGTCGCG	CCGTCTCAAAAAAAAAAAAAAAAAAAAA_____GGGGCCGGGGGGGGGGGGGGGGGTGGGTCGCG
2'-O-Me	chr19:15308141(+)	RiboMeth-seq (High)	Human	lnc-OR7C2-1,lnc-OR7C2-1:2	rs1397983698	chr19:15308137..15308141	dbSNP153			CCGTCTCAAAAAAAAAAAAAAAAAAAAAGTTGCGGGGCCGGGGGGGGGGGGGGGGGTGGGTCGCG	CCGTCTCAAAAAAAAAAAAAAAAAAAAAG____GGGGCCGGGGGGGGGGGGGGGGGTGGGTCGCG
2'-O-Me	chr19:15308141(+)	RiboMeth-seq (High)	Human	lnc-OR7C2-1,lnc-OR7C2-1:2	rs202202382	chr19:15308141..15308141	dbSNP153			CCGTCTCAAAAAAAAAAAAAAAAAAAAAGTTGCGGGGCCGGGGGGGGGGGGGGGGGTGGGTCGCG	CCGTCTCAAAAAAAAAAAAAAAAAAAAAGTTGGGGGGCCGGGGGGGGGGGGGGGGGTGGGTCGCG
2'-O-Me	chr19:15308141(+)	RiboMeth-seq (High)	Human	lnc-OR7C2-1,lnc-OR7C2-1:2	rs202202382	chr19:15308141..15308141	dbSNP153			CCGTCTCAAAAAAAAAAAAAAAAAAAAAGTTGCGGGGCCGGGGGGGGGGGGGGGGGTGGGTCGCG	CCGTCTCAAAAAAAAAAAAAAAAAAAAAGTTGTGGGGCCGGGGGGGGGGGGGGGGGTGGGTCGCG
2'-O-Me	chr1:11908241(+)	Nm-seq (High)	Human	RNU5E-1,AL021155.4	rs547853286	chr1:11908239..11908241	dbSNP153	RBP 25		TGGAGAGAAACGAGTGTGAGTCTGAAACCAATTTTTTGAGGCCTTGCGTTTCTTAGCAGGGCTTA	TGGAGAGAAACGAGTGTGAGTCTGAAACCAA__TTTTGAGGCCTTGCGTTTCTTAGCAGGGCTTA
2'-O-Me	chr1:11908240(+)	Nm-seq (High)	Human	RNU5E-1,AL021155.4	rs547853286	chr1:11908239..11908241	dbSNP153	RBP 25		GTGGAGAGAAACGAGTGTGAGTCTGAAACCAATTTTTTGAGGCCTTGCGTTTCTTAGCAGGGCTT	GTGGAGAGAAACGAGTGTGAGTCTGAAACCAA__TTTTGAGGCCTTGCGTTTCTTAGCAGGGCTT
2'-O-Me	chr1:11908241(+)	Nm-seq (High)	Human	RNU5E-1,AL021155.4	rs547853286	chr1:11908239..11908241	dbSNP153	RBP 25		TGGAGAGAAACGAGTGTGAGTCTGAAACCAATTTTTTGAGGCCTTGCGTTTCTTAGCAGGGCTTA	TGGAGAGAAACGAGTGTGAGTCTGAAACCAAT_TTTTGAGGCCTTGCGTTTCTTAGCAGGGCTTA
2'-O-Me	chr1:11908240(+)	Nm-seq (High)	Human	RNU5E-1,AL021155.4	rs150527762	chr1:11908240..11908240	dbSNP153	RBP 25		GTGGAGAGAAACGAGTGTGAGTCTGAAACCAATTTTTTGAGGCCTTGCGTTTCTTAGCAGGGCTT	GTGGAGAGAAACGAGTGTGAGTCTGAAACCAAATTTTTGAGGCCTTGCGTTTCTTAGCAGGGCTT
2'-O-Me	chr1:11908240(+)	Nm-seq (High)	Human	RNU5E-1,AL021155.4	rs150527762	chr1:11908240..11908240	dbSNP153	RBP 25		GTGGAGAGAAACGAGTGTGAGTCTGAAACCAATTTTTTGAGGCCTTGCGTTTCTTAGCAGGGCTT	GTGGAGAGAAACGAGTGTGAGTCTGAAACCAACTTTTTGAGGCCTTGCGTTTCTTAGCAGGGCTT
2'-O-Me	chr1:11908240(+)	Nm-seq (High)	Human	RNU5E-1,AL021155.4	rs150527762	chr1:11908240..11908240	dbSNP153	RBP 25		GTGGAGAGAAACGAGTGTGAGTCTGAAACCAATTTTTTGAGGCCTTGCGTTTCTTAGCAGGGCTT	GTGGAGAGAAACGAGTGTGAGTCTGAAACCAAGTTTTTGAGGCCTTGCGTTTCTTAGCAGGGCTT
2'-O-Me	chr1:11908241(+)	Nm-seq (High)	Human	RNU5E-1,AL021155.4	rs966088486	chr1:11908241..11908241	dbSNP153	RBP 25		TGGAGAGAAACGAGTGTGAGTCTGAAACCAATTTTTTGAGGCCTTGCGTTTCTTAGCAGGGCTTA	TGGAGAGAAACGAGTGTGAGTCTGAAACCAATATTTTGAGGCCTTGCGTTTCTTAGCAGGGCTTA
2'-O-Me	chr1:11908241(+)	Nm-seq (High)	Human	RNU5E-1,AL021155.4	rs966088486	chr1:11908241..11908241	dbSNP153	RBP 25		TGGAGAGAAACGAGTGTGAGTCTGAAACCAATTTTTTGAGGCCTTGCGTTTCTTAGCAGGGCTTA	TGGAGAGAAACGAGTGTGAGTCTGAAACCAATCTTTTGAGGCCTTGCGTTTCTTAGCAGGGCTTA
2'-O-Me	chr1:11908241(+)	Nm-seq (High)	Human	RNU5E-1,AL021155.4	rs966088486	chr1:11908241..11908241	dbSNP153	RBP 25		TGGAGAGAAACGAGTGTGAGTCTGAAACCAATTTTTTGAGGCCTTGCGTTTCTTAGCAGGGCTTA	TGGAGAGAAACGAGTGTGAGTCTGAAACCAATGTTTTGAGGCCTTGCGTTTCTTAGCAGGGCTTA
2'-O-Me	chr1:11909838(+)	Nm-seq (High)	Human	AL021155.4	rs373272020	chr1:11909838..11909838	dbSNP153			AAGCCTTGCTAAAAAATGCAAGACCTCTAAAAAATTGGTTTAAAACTCAGAATTATTCCTCTCCA	AAGCCTTGCTAAAAAATGCAAGACCTCTAAAACATTGGTTTAAAACTCAGAATTATTCCTCTCCA
2'-O-Me	chr1:11909838(+)	Nm-seq (High)	Human	AL021155.4	rs373272020	chr1:11909838..11909838	dbSNP153			AAGCCTTGCTAAAAAATGCAAGACCTCTAAAAAATTGGTTTAAAACTCAGAATTATTCCTCTCCA	AAGCCTTGCTAAAAAATGCAAGACCTCTAAAAGATTGGTTTAAAACTCAGAATTATTCCTCTCCA
2'-O-Me	chr1:11909838(+)	Nm-seq (High)	Human	AL021155.4	rs373272020	chr1:11909838..11909838	dbSNP153			AAGCCTTGCTAAAAAATGCAAGACCTCTAAAAAATTGGTTTAAAACTCAGAATTATTCCTCTCCA	AAGCCTTGCTAAAAAATGCAAGACCTCTAAAATATTGGTTTAAAACTCAGAATTATTCCTCTCCA
2'-O-Me	chr1:109100294(+)	Nm-seq (High)	Human	SCARNA2,AL356488.2	rs759949455	chr1:109100287..109100295	dbSNP153	RBP 24 miRNA 2 circRNA 1		CGTGCAGGGTGAGTGTGAGTGGACGCGTGAGTGTGTGAGTGTGCGCGCTTGGAGCGTGTTAGGCG	CGTGCAGGGTGAGTGTGAGTGGACGC________GTGAGTGTGCGCGCTTGGAGCGTGTTAGGCG
2'-O-Me	chr1:109100294(+)	Nm-seq (High)	Human	SCARNA2,AL356488.2	rs771196826	chr1:109100291..109100295	dbSNP153	RBP 24 miRNA 2 circRNA 1		CGTGCAGGGTGAGTGTGAGTGGACGCGTGAGTGTGTGAGTGTGCGCGCTTGGAGCGTGTTAGGCG	CGTGCAGGGTGAGTGTGAGTGGACGCGTGA____GTGAGTGTGCGCGCTTGGAGCGTGTTAGGCG
2'-O-Me	chr1:109100294(+)	Nm-seq (High)	Human	SCARNA2,AL356488.2	rs771196826	chr1:109100291..109100295	dbSNP153	RBP 24 miRNA 2 circRNA 1		CGTGCAGGGTGAGTGTGAGTGGACGCGTGAGTGTGTGAGTGTGCGCGCTTGGAGCGTGTTAGGCG	CGTGCAGGGTGAGTGTGAGTGGACGCGTGAGT__GTGAGTGTGCGCGCTTGGAGCGTGTTAGGCG
2'-O-Me	chr1:110347744(+)	Nm-seq (High)	Human	LAMTOR5-AS1	rs980805794	chr1:110347744..110347744	dbSNP153	RBP 13		AGGCTTGTTGGGCTTGTTTTGAATTTTAACCTCGGATGGAAGAGCCCTAGTGCTGTCTGTCTCCA	AGGCTTGTTGGGCTTGTTTTGAATTTTAACCTTGGATGGAAGAGCCCTAGTGCTGTCTGTCTCCA
2'-O-Me	chr1:145475398(-)	RiboMeth-seq (High)	Human	tRNA-Asn-GTT-9-1,HSALNG0006639-001	rs1241175963	chr1:145475398..145475398	dbSNP153			GCGTTCGGCTGTTAACTGAAAGGTTGGTGGTTCGAGCCCACCCGGGGACGCTTGCTCTAGCTTTT	GCGTTCGGCTGTTAACTGAAAGGTTGGTGGTTTGAGCCCACCCGGGGACGCTTGCTCTAGCTTTT
2'-O-Me	chr1:28508582(+)	RiboMeth-seq (High)	Human	SNORA73B,RCC1,SNHG3	rs772204020	chr1:28508582..28508582	dbSNP153	RBP 24 miRNA 2 circRNA 8		ATGAGCATTCCAACGTGGATACCCTGGGAGGTCACTCTCCCCAGGCTCTGTCCAAGTGGCATAGG	ATGAGCATTCCAACGTGGATACCCTGGGAGGTAACTCTCCCCAGGCTCTGTCCAAGTGGCATAGG
2'-O-Me	chr1:28579852(-)	Nm-seq (High)	Human	SNORA61,SNHG12	rs879179090	chr1:28579852..28579852	dbSNP153	RBP 21 circRNA 5		ATCCCTTTCCCATCGGATCTGAACACTGGTCTTGGTGGTCGTAAAAGGAGGAAAAGTAATAGTGA	ATCCCTTTCCCATCGGATCTGAACACTGGTCTCGGTGGTCGTAAAAGGAGGAAAAGTAATAGTGA
2'-O-Me	chr1:28579852(-)	Nm-seq (High)	Human	SNORA61,SNHG12	rs879179090	chr1:28579852..28579852	dbSNP153	RBP 21 circRNA 5		ATCCCTTTCCCATCGGATCTGAACACTGGTCTTGGTGGTCGTAAAAGGAGGAAAAGTAATAGTGA	ATCCCTTTCCCATCGGATCTGAACACTGGTCTAGGTGGTCGTAAAAGGAGGAAAAGTAATAGTGA
2'-O-Me	chr1:28580427(-)	Nm-seq (High)	Human	SNORA44,SNHG12	rs780313741	chr1:28580426..28580428	dbSNP153	RBP 24 Splice 1 circRNA 6		TGCAAGAGCAACCTGGAAAGACTTTGACAGCGCAGGTCAGTACAATACCTGCAAGCTGCCACTCA	TGCAAGAGCAACCTGGAAAGACTTTGACAGC__AGGTCAGTACAATACCTGCAAGCTGCCACTCA
2'-O-Me	chr1:28580427(-)	Nm-seq (High)	Human	SNORA44,SNHG12	rs758875944	chr1:28580427..28580427	dbSNP153	RBP 24 Splice 1 circRNA 6		TGCAAGAGCAACCTGGAAAGACTTTGACAGCGCAGGTCAGTACAATACCTGCAAGCTGCCACTCA	TGCAAGAGCAACCTGGAAAGACTTTGACAGCGTAGGTCAGTACAATACCTGCAAGCTGCCACTCA
2'-O-Me	chr1:28648670(+)	Nm-seq (High)	Human	RNU11,AL360012.1	rs375833135	chr1:28648670..28648670	dbSNP153	RBP 24 miRNA 1		CTCGATTGCTCTGCGTGCGGAATCGACATCAAGAGATTTCGGAAGCATAATTTTTTGGTATTTGG	CTCGATTGCTCTGCGTGCGGAATCGACATCAAAAGATTTCGGAAGCATAATTTTTTGGTATTTGG
2'-O-Me	chr1:28648670(+)	Nm-seq (High)	Human	RNU11,AL360012.1	rs375833135	chr1:28648670..28648670	dbSNP153	RBP 24 miRNA 1		CTCGATTGCTCTGCGTGCGGAATCGACATCAAGAGATTTCGGAAGCATAATTTTTTGGTATTTGG	CTCGATTGCTCTGCGTGCGGAATCGACATCAACAGATTTCGGAAGCATAATTTTTTGGTATTTGG
2'-O-Me	chr1:28648675(+)	Nm-seq (High)	Human	RNU11,AL360012.1	rs534905997	chr1:28648675..28648675	dbSNP153	RBP 24 miRNA 1		TTGCTCTGCGTGCGGAATCGACATCAAGAGATTTCGGAAGCATAATTTTTTGGTATTTGGGCAGC	TTGCTCTGCGTGCGGAATCGACATCAAGAGATCTCGGAAGCATAATTTTTTGGTATTTGGGCAGC
2'-O-Me	chr1:28648675(+)	Nm-seq (High)	Human	RNU11,AL360012.1	rs534905997	chr1:28648675..28648675	dbSNP153	RBP 24 miRNA 1		TTGCTCTGCGTGCGGAATCGACATCAAGAGATTTCGGAAGCATAATTTTTTGGTATTTGGGCAGC	TTGCTCTGCGTGCGGAATCGACATCAAGAGATGTCGGAAGCATAATTTTTTGGTATTTGGGCAGC
2'-O-Me	chr1:166275645(+)	Nm-seq (High)	Human	AL596087.2	rs1375356174	chr1:166275632..166275645	dbSNP153			TGCGGGTTCTCTGCATCTAGTAGGGCTGATCTCTGCGCTCCTGACAGTGCTCGCCTTTATCCGTT	TGCGGGTTCTCTGCATCTAG_____________TGCGCTCCTGACAGTGCTCGCCTTTATCCGTT
2'-O-Me	chr1:166275645(+)	Nm-seq (High)	Human	AL596087.2	rs1557955591	chr1:166275641..166275646	dbSNP153			TGCGGGTTCTCTGCATCTAGTAGGGCTGATCTCTGCGCTCCTGACAGTGCTCGCCTTTATCCGTT	TGCGGGTTCTCTGCATCTAGTAGGGCTGA_____GCGCTCCTGACAGTGCTCGCCTTTATCCGTT
2'-O-Me	chr1:173865372(-)	RiboMeth-seq (High)	Human	GAS5	rs751667666	chr1:173865372..173865372	dbSNP153	RBP 25 miRNA 1 circRNA 28		GCAGATGGGAATCTCTCTGAGAAAGAAAATGGAGATTAATCTTAAACTGAAACAGTAGTTGGGAA	GCAGATGGGAATCTCTCTGAGAAAGAAAATGGGGATTAATCTTAAACTGAAACAGTAGTTGGGAA
2'-O-Me	chr1:173865976(-)	Nm-seq (High)	Human	GAS5	rs772103330	chr1:173865976..173865976	dbSNP153	RBP 24 miRNA 8 circRNA 25		TGCTGACTGAACATGAAGGTCTTAATTAGCTCTAACTGACTAAAGGCATTTGTTAGTTTTGGCAG	TGCTGACTGAACATGAAGGTCTTAATTAGCTCCAACTGACTAAAGGCATTTGTTAGTTTTGGCAG
2'-O-Me	chr1:173865976(-)	Nm-seq (High)	Human	GAS5	rs772103330	chr1:173865976..173865976	dbSNP153	RBP 24 miRNA 8 circRNA 25		TGCTGACTGAACATGAAGGTCTTAATTAGCTCTAACTGACTAAAGGCATTTGTTAGTTTTGGCAG	TGCTGACTGAACATGAAGGTCTTAATTAGCTCAAACTGACTAAAGGCATTTGTTAGTTTTGGCAG
2'-O-Me	chr1:214354330(-)	Nm-seq (High)	Human	AL929236.1,PTPN14	rs748856448	chr1:214354330..214354330	dbSNP153	RBP 4 miRNA 2 circRNA 2		TGAGCTGCAATATTCAGTCGGAGCTAAACAATAAGATCAGGGAAGGTAAAAATACCTATGTGGAA	TGAGCTGCAATATTCAGTCGGAGCTAAACAATGAGATCAGGGAAGGTAAAAATACCTATGTGGAA
2'-O-Me	chr20:38424562(-)	Nm-seq (High)	Human	SNHG17	rs954292326	chr20:38424562..38424562	dbSNP153	RBP 4 circRNA 2		TGGTAACTGACATGTAGCACCTGGACAAACAGTAAATGAGAAGACACATTGTTGTAAGGTGACAA	TGGTAACTGACATGTAGCACCTGGACAAACAGCAAATGAGAAGACACATTGTTGTAAGGTGACAA
2'-O-Me	chr20:49278975(+)	Nm-seq (High)	Human	ZFAS1,SNORD12C	rs1171368468	chr20:49278975..49278975	dbSNP153	RBP 25		GGTGTAAATGATGACTTCACTTTTTTCCCCATCAGATCGACAATGCTGACGTCTTATATTTTGCC	GGTGTAAATGATGACTTCACTTTTTTCCCCATTAGATCGACAATGCTGACGTCTTATATTTTGCC
2'-O-Me	chr20:49280354(+)	Nm-seq (High)	Human	ZFAS1,SNORD12B	rs1406548688	chr20:49280338..49280354	dbSNP153	RBP 25 circRNA 2		GGCATATATGATGACTTAGCTTTTTTCCCCGACAGATCGACTATGTTGATCTAACTTTTCTAAGC	GGCATATATGATGACTT________________AGATCGACTATGTTGATCTAACTTTTCTAAGC
2'-O-Me	chr20:49280354(+)	Nm-seq (High)	Human	ZFAS1,SNORD12B	rs780654382	chr20:49280354..49280354	dbSNP153	RBP 25 circRNA 2		GGCATATATGATGACTTAGCTTTTTTCCCCGACAGATCGACTATGTTGATCTAACTTTTCTAAGC	GGCATATATGATGACTTAGCTTTTTTCCCCGATAGATCGACTATGTTGATCTAACTTTTCTAAGC
2'-O-Me	chr20:58571696(+)	RiboMeth-seq (High)	Human	APCDD1L-DT	rs1445424620	chr20:58571696..58571696	dbSNP153			CCCAGAGTCTGGAGTGAAGAGAAGTACCAGGTGTCCTAAGAATGCTACAGCGGCTGCCTTCAAAC	CCCAGAGTCTGGAGTGAAGAGAAGTACCAGGTTTCCTAAGAATGCTACAGCGGCTGCCTTCAAAC
2'-O-Me	chr22:29528129(-)	Nm-seq (High)	Human	AC005529.1,THOC5	rs188617925	chr22:29528129..29528129	dbSNP153	RBP 8 Splice 16 circRNA 12		CACTGGGGGTTCAGTTGGACGACAAACGCAAGGAGATGCTGAAGAGGCACCCACTGTCTGTCATG	CACTGGGGGTTCAGTTGGACGACAAACGCAAGTAGATGCTGAAGAGGCACCCACTGTCTGTCATG
2'-O-Me	chr22:29528129(-)	Nm-seq (High)	Human	AC005529.1,THOC5	rs188617925	chr22:29528129..29528129	dbSNP153	RBP 8 Splice 16 circRNA 12		CACTGGGGGTTCAGTTGGACGACAAACGCAAGGAGATGCTGAAGAGGCACCCACTGTCTGTCATG	CACTGGGGGTTCAGTTGGACGACAAACGCAAGCAGATGCTGAAGAGGCACCCACTGTCTGTCATG
2'-O-Me	chr22:35450635(+)	Nm-seq (High)	Human	lnc-MCM5-1	rs1294324080	chr22:35450635..35450635	dbSNP153	RBP 1		CCGGAGCCACAGTCACTGACCAGGGACTTCTGAAGACAGGAGGAGCATCGAATGAGAAGATCCAA	CCGGAGCCACAGTCACTGACCAGGGACTTCTGCAGACAGGAGGAGCATCGAATGAGAAGATCCAA
2'-O-Me	chr22:42330460(+)	Nm-seq (High)	Human	HSALNG0135700	rs540198631	chr22:42330460..42330460	dbSNP153			TGCAACACTCTTCTCTGTGTCTCTCCCCTGCTGGTTGTTCTGAGCTCAGATGCTATATCCTCCAG	TGCAACACTCTTCTCTGTGTCTCTCCCCTGCTAGTTGTTCTGAGCTCAGATGCTATATCCTCCAG
2'-O-Me	chr22:42615361(+)	Nm-seq (High)	Human	Z93241.1,RNU12	rs899846928	chr22:42615361..42615361	dbSNP153	RBP 25 miRNA 1		GGTAAAGGTCGCCCTCAAGGTGACCCGCCTACTTTGCGGGATGCCTGGGAGTTGCGATCTGCCCG	GGTAAAGGTCGCCCTCAAGGTGACCCGCCTACCTTGCGGGATGCCTGGGAGTTGCGATCTGCCCG
2'-O-Me	chr22:42615361(+)	Nm-seq (High)	Human	Z93241.1,RNU12	rs899846928	chr22:42615361..42615361	dbSNP153	RBP 25 miRNA 1		GGTAAAGGTCGCCCTCAAGGTGACCCGCCTACTTTGCGGGATGCCTGGGAGTTGCGATCTGCCCG	GGTAAAGGTCGCCCTCAAGGTGACCCGCCTACGTTGCGGGATGCCTGGGAGTTGCGATCTGCCCG
2'-O-Me	chr2:121530970(+)	Nm-seq (High)	Human	RNU4ATAC,AC012447.1	rs1044488450	chr2:121530970..121530970	dbSNP153	RBP 24		TGCTAACGCCTGAACAACACACCCGCATCAACTAGAGCTTTTGCTTTATTTTGGTGCAATTTTTG	TGCTAACGCCTGAACAACACACCCGCATCAACCAGAGCTTTTGCTTTATTTTGGTGCAATTTTTG
2'-O-Me	chr2:121530970(+)	Nm-seq (High)	Human	RNU4ATAC,AC012447.1	rs1044488450	chr2:121530970..121530970	dbSNP153	RBP 24		TGCTAACGCCTGAACAACACACCCGCATCAACTAGAGCTTTTGCTTTATTTTGGTGCAATTTTTG	TGCTAACGCCTGAACAACACACCCGCATCAACGAGAGCTTTTGCTTTATTTTGGTGCAATTTTTG
2'-O-Me	chr2:132279266(+)	Nm-seq (High)	Human	lnc-GPR39-7,lnc-GPR39-10,lnc-GPR39-10:2,lnc-GPR39-7:2	rs1274140324	chr2:132279266..132279266	dbSNP153			ATGAATGCTTGGCCGCAACGAACCAGTTATCCCCTGTGGTAACTTCTGATACCTCCTGCTTAAAA	ATGAATGCTTGGCCGCAACGAACCAGTTATCCTCTGTGGTAACTTCTGATACCTCCTGCTTAAAA
2'-O-Me	chr2:133266719(+)	Nm-seq (High)	Human	NCKAP5-AS2	rs1559334860	chr2:133266719..133266719	dbSNP153			CGCAGCCCGGGCACCTCGCGCTCCTCCGCTTTGTTGTGTTCCGCCGCCAGTCCCCCTGCGCCTGC	CGCAGCCCGGGCACCTCGCGCTCCTCCGCTTTCTTGTGTTCCGCCGCCAGTCCCCCTGCGCCTGC
2'-O-Me	chr2:19870588(+)	RiboMeth-seq (High)	Human	LINC00954	rs1260655111	chr2:19870588..19870588	dbSNP153			GGTAACCCCAGCCAGAATGCTGGGTCTCCTGGGGCCGAAACTACCTCCTTCGTTCTATGAAGTGA	GGTAACCCCAGCCAGAATGCTGGGTCTCCTGGAGCCGAAACTACCTCCTTCGTTCTATGAAGTGA
2'-O-Me	chr2:24364760(+)	RiboMeth-seq (High)	Human	lnc-NCOA1-4	rs1460714062	chr2:24364760..24364760	dbSNP153	RBP 1		TTTTGAAGGCAGAAGTGGAGAAGAGTTCCACGTGAACAGCAGTAGGTATGAGTTATATATTTTTT	TTTTGAAGGCAGAAGTGGAGAAGAGTTCCACGAGAACAGCAGTAGGTATGAGTTATATATTTTTT
2'-O-Me	chr2:175304447(+)	RiboMeth-seq (High)	Human	AC093459.1	rs1411104469	chr2:175304447..175304447	dbSNP153			TGGTAAGGCAAACTGGACACTGCTCATGTCATCCAAGGAAGGCAGGACAGACATTTGTCTCTGGT	TGGTAAGGCAAACTGGACACTGCTCATGTCATTCAAGGAAGGCAGGACAGACATTTGTCTCTGGT
2'-O-Me	chr2:70085869(-)	Nm-seq (High)	Human	PCBP1-AS1	rs1156893106	chr2:70085869..70085869	dbSNP153	RBP 7 Splice 21 circRNA 3		TTCCTAGCATGGGCTGTTGTGCTGGAGAGAACGAGAGCTACGAAGAGACTACAGTGCCTCTGACT	TTCCTAGCATGGGCTGTTGTGCTGGAGAGAACAAGAGCTACGAAGAGACTACAGTGCCTCTGACT
2'-O-Me	chr3:181231796(+)	RiboMeth-seq (High)	Human	RNU6-4P,SOX2-OT	rs1350012535	chr3:181231796..181231796	dbSNP153	RBP 24 miRNA 2		AAATTGGAACGATACAGAGAAGATTAGCATGGCCCCTGCGCAAGGATGACACGCAAATTCGTGAA	AAATTGGAACGATACAGAGAAGATTAGCATGGTCCCTGCGCAAGGATGACACGCAAATTCGTGAA
2'-O-Me	chr4:182135337(-)	RiboMeth-seq (High)	Human	TENM3-AS1	rs536373525	chr4:182135337..182135337	dbSNP153			TTCTTTGCTTAAAGATGACACCAGAAACACCACTACTCTTAGGGTACAAACGTCCCAAGTGAGAC	TTCTTTGCTTAAAGATGACACCAGAAACACCATTACTCTTAGGGTACAAACGTCCCAAGTGAGAC
2'-O-Me	chr4:52712666(+)	Nm-seq (High)	Human	LINC01618,DANCR	rs1301427315	chr4:52712666..52712666	dbSNP153	RBP 18 circRNA 2		TGCCCGCCTCGAGCTCCTCTGCTCCCGGCGGCCAGAACGGAGGGGTAGAGCAGCCCTCGGCGGCC	TGCCCGCCTCGAGCTCCTCTGCTCCCGGCGGCGAGAACGGAGGGGTAGAGCAGCCCTCGGCGGCC
2'-O-Me	chr4:82895903(-)	RiboMeth-seq (High)	Human	SEC31A,THAP9-AS1	rs1016925243	chr4:82895903..82895903	dbSNP153	RBP 25 miRNA 1 circRNA 6		GAAATAAATGTCCAATGATTAAATTTTTTCCACTGCTGTTCACATCATGATTTGTTGTGATTAAT	GAAATAAATGTCCAATGATTAAATTTTTTCCATTGCTGTTCACATCATGATTTGTTGTGATTAAT
2'-O-Me	chr5:17184633(-)	Nm-seq (High)	Human	BASP1-AS1	rs1255329915	chr5:17184633..17184633	dbSNP153			ATTCTAGAGGAAGTCAGAACTGGCCTGTTCTTGAGGTGGGAGGAGACATTGGTTTATCTGTTGAG	ATTCTAGAGGAAGTCAGAACTGGCCTGTTCTTTAGGTGGGAGGAGACATTGGTTTATCTGTTGAG
2'-O-Me	chr5:177446479(-)	Nm-seq (High)	Human	PRR7-AS1	rs930171642	chr5:177446479..177446479	dbSNP153	RBP 1 circRNA 2		CTGAGGTCGAGAACCCGGACGCGCACACAGCTCAGCTCGGAGAGCACACACATGTCCAGGTCCCC	CTGAGGTCGAGAACCCGGACGCGCACACAGCTGAGCTCGGAGAGCACACACATGTCCAGGTCCCC
2'-O-Me	chr5:181188450(+)	Nm-seq (High)	Human	RF00017-049,lnc-OR2V2-3	rs1424249121	chr5:181188450..181188450	dbSNP153			TTTCCGCCCGGTTTCGAACCGGGGACCTTTCGCGTGTTAGGCGAACGTGATGACCACTACACTAC	TTTCCGCCCGGTTTCGAACCGGGGACCTTTCGTGTGTTAGGCGAACGTGATGACCACTACACTAC
2'-O-Me	chr6:153282725(+)	Nm-seq (High)	Human	AL590867.1	rs1261900418	chr6:153282725..153282725	dbSNP153			TGGCCCCTAAGTTTCCGGGTCTTCCTCAGTCTGGATGGCATGTTGGCAGCCCAGACGAAAAAAAA	TGGCCCCTAAGTTTCCGGGTCTTCCTCAGTCTAGATGGCATGTTGGCAGCCCAGACGAAAAAAAA
2'-O-Me	chr6:27478823(+)	RiboMeth-seq (High)	Human	AL021918.5	rs1000374753	chr6:27478823..27478823	dbSNP153	RBP 7		AAGGGAGCCTTCTCCATTCGTGTAGTCGTGGCCGAGTGGTTAAGGCGATGGACTAGAAATCCATT	AAGGGAGCCTTCTCCATTCGTGTAGTCGTGGCTGAGTGGTTAAGGCGATGGACTAGAAATCCATT
2'-O-Me	chr6:27505898(-)	RiboMeth-seq (High)	Human	AL021918.3	rs141050296	chr6:27505898..27505898	dbSNP153	RBP 13		CCAAGAGCACTACACAGGTGCGTAGTCGTGGCCGAGTGGTTAAGGCGATGGACTTGAAATCCATT	CCAAGAGCACTACACAGGTGCGTAGTCGTGGCTGAGTGGTTAAGGCGATGGACTTGAAATCCATT
2'-O-Me	chr6:28941126(+)	Nm-seq (High)	Human	lnc-OR2J1-12,TRL-CAA1-2,TRL-CAA1-1-001,tRNA-Leu,tRNA-Leu:2,tRNA-Leu:3,TRL-CAA1-2:2,tRNA-Leu-CAA-1-1	rs568260917	chr6:28941126..28941126	dbSNP153	RBP 24		GGCTTCCTCGTGTTGAGGATTCTGGTCTCCAATGGAGGCGTGGGTTCGAATCCCACTTCTGACAC	GGCTTCCTCGTGTTGAGGATTCTGGTCTCCAACGGAGGCGTGGGTTCGAATCCCACTTCTGACAC
2'-O-Me	chr6:28941126(+)	Nm-seq (High)	Human	lnc-OR2J1-12,TRL-CAA1-2,TRL-CAA1-1-001,tRNA-Leu,tRNA-Leu:2,tRNA-Leu:3,TRL-CAA1-2:2,tRNA-Leu-CAA-1-1	rs568260917	chr6:28941126..28941126	dbSNP153	RBP 24		GGCTTCCTCGTGTTGAGGATTCTGGTCTCCAATGGAGGCGTGGGTTCGAATCCCACTTCTGACAC	GGCTTCCTCGTGTTGAGGATTCTGGTCTCCAAGGGAGGCGTGGGTTCGAATCCCACTTCTGACAC
2'-O-Me	chr6:30323676(-)	RiboMeth-seq (High)	Human	HCG17,HCG18	rs937634082	chr6:30323676..30323676	dbSNP153	RBP 3		GTCGAGAACATCCTTGTACATATCTCTTTAGATCGTCGTGCCATTATATTAGTAGGATAAATTTC	GTCGAGAACATCCTTGTACATATCTCTTTAGAGCGTCGTGCCATTATATTAGTAGGATAAATTTC
2'-O-Me	chr6:31834974(+)	Nm-seq (High)	Human	SNHG32,AL671762.1	rs1485785469	chr6:31834973..31834974	dbSNP153	RBP 17 Splice 1		GGCAGTATGAGAGTTGTAATGGCCCGACTGTTGAGTGAGGGGGAGCAGGGGATCCCAACGGCTTG	GGCAGTATGAGAGTTGTAATGGCCCGACTGTT_AGTGAGGGGGAGCAGGGGATCCCAACGGCTTG
2'-O-Me	chr6:57936616(-)	RiboMeth-seq (High)	Human	AL021368.4	rs570587889	chr6:57936616..57936616	dbSNP153	circRNA 4		CAGATAAAAAAAGAAAAAGAAAAAAAAGAGGCCGGGTGTGGTGGCTTATGCCTATAATCCTAGCA	CAGATAAAAAAAGAAAAAGAAAAAAAAGAGGCTGGGTGTGGTGGCTTATGCCTATAATCCTAGCA
2'-O-Me	chr7:5680231(-)	Nm-seq (High)	Human	RNF216-IT1,RNF216	rs57441742	chr7:5680231..5680231	dbSNP153	RBP 2 circRNA 11		GTTGGACCTTGAAGGCTGCATTAGAGCATGAAGAGACTTCCGGAAGAGGACACAGAGTGTTAAAG	GTTGGACCTTGAAGGCTGCATTAGAGCATGAATAGACTTCCGGAAGAGGACACAGAGTGTTAAAG
2'-O-Me	chr7:5680231(-)	Nm-seq (High)	Human	RNF216-IT1,RNF216	rs57441742	chr7:5680231..5680231	dbSNP153	RBP 2 circRNA 11		GTTGGACCTTGAAGGCTGCATTAGAGCATGAAGAGACTTCCGGAAGAGGACACAGAGTGTTAAAG	GTTGGACCTTGAAGGCTGCATTAGAGCATGAAAAGACTTCCGGAAGAGGACACAGAGTGTTAAAG
2'-O-Me	chr7:148941564(+)	Nm-seq (High)	Human	AC073140.2	rs1046749854	chr7:148941564..148941564	dbSNP153	RBP 24 circRNA 1		TGTCTCCCCCCACAACCGCGCTTGACTAGCTTGCTGTTTTGCACTAATAACAGTAGTAGACAACG	TGTCTCCCCCCACAACCGCGCTTGACTAGCTTACTGTTTTGCACTAATAACAGTAGTAGACAACG
2'-O-Me	chr7:148941564(+)	Nm-seq (High)	Human	AC073140.2	rs1046749854	chr7:148941564..148941564	dbSNP153	RBP 24 circRNA 1		TGTCTCCCCCCACAACCGCGCTTGACTAGCTTGCTGTTTTGCACTAATAACAGTAGTAGACAACG	TGTCTCCCCCCACAACCGCGCTTGACTAGCTTCCTGTTTTGCACTAATAACAGTAGTAGACAACG
2'-O-Me	chr7:148941568(+)	Nm-seq (High)	Human	AC073140.2	rs1225315586	chr7:148941568..148941568	dbSNP153	RBP 24 circRNA 1		TCCCCCCACAACCGCGCTTGACTAGCTTGCTGTTTTGCACTAATAACAGTAGTAGACAACGTTTA	TCCCCCCACAACCGCGCTTGACTAGCTTGCTGCTTTGCACTAATAACAGTAGTAGACAACGTTTA
2'-O-Me	chr7:66505497(+)	Nm-seq (High)	Human	lnc-VKORC1L1-2	rs1182505318	chr7:66505497..66505497	dbSNP153			GGTCCGGAACAGGGCTTTGCTCTCCTCCATCCGGTTCTCGTTGTCCGACTCCACCAGGACTTGGT	GGTCCGGAACAGGGCTTTGCTCTCCTCCATCCAGTTCTCGTTGTCCGACTCCACCAGGACTTGGT
2'-O-Me	chr7:66505497(+)	Nm-seq (High)	Human	lnc-VKORC1L1-2	rs1182505318	chr7:66505497..66505497	dbSNP153			GGTCCGGAACAGGGCTTTGCTCTCCTCCATCCGGTTCTCGTTGTCCGACTCCACCAGGACTTGGT	GGTCCGGAACAGGGCTTTGCTCTCCTCCATCCTGTTCTCGTTGTCCGACTCCACCAGGACTTGGT
2'-O-Me	chr7:88296014(+)	RiboMeth-seq (High)	Human	AC003991.1	rs974994377	chr7:88296014..88296014	dbSNP153			AGTATGTTTTGAGTGTGCAGGCCTTGGAAAAGAGAGAGTTCAAGGTATGCCAGATTCAAGACTTG	AGTATGTTTTGAGTGTGCAGGCCTTGGAAAAGGGAGAGTTCAAGGTATGCCAGATTCAAGACTTG
2'-O-Me	chr8:127218600(-)	Nm-seq (High)	Human	CASC19	rs1198854720	chr8:127218600..127218600	dbSNP153	RBP 7		ACTCAGAAAAAGAGCAATTTAACCAGAATTGGAAGGTCAAGGAGGGCCGCCTGGAGGAAACAATA	ACTCAGAAAAAGAGCAATTTAACCAGAATTGGCAGGTCAAGGAGGGCCGCCTGGAGGAAACAATA
2'-O-Me	chr8:127228903(+)	Nm-seq (High)	Human	PCAT1	rs1028834596	chr8:127228903..127228903	dbSNP153	RBP 1		ATTTTTGTGAAAAATCGCAATAAGATGTATCTCTAGATCGTGTGCTTGCCAGAATCTTTGCTGTT	ATTTTTGTGAAAAATCGCAATAAGATGTATCTATAGATCGTGTGCTTGCCAGAATCTTTGCTGTT
2'-O-Me	chr8:127228903(+)	Nm-seq (High)	Human	PCAT1	rs1028834596	chr8:127228903..127228903	dbSNP153	RBP 1		ATTTTTGTGAAAAATCGCAATAAGATGTATCTCTAGATCGTGTGCTTGCCAGAATCTTTGCTGTT	ATTTTTGTGAAAAATCGCAATAAGATGTATCTTTAGATCGTGTGCTTGCCAGAATCTTTGCTGTT
2'-O-Me	chr8:128007123(+)	Nm-seq (High)	Human	PVT1	rs1248481420	chr8:128007123..128007123	dbSNP153	RBP 2 circRNA 22		CAAAGAATGACTGAGGAATGAGTTCAGATTAAAAGAGACGAAGGGACACGCTCCAACTGTAACTG	CAAAGAATGACTGAGGAATGAGTTCAGATTAAGAGAGACGAAGGGACACGCTCCAACTGTAACTG
2'-O-Me	chr8:66113424(+)	Nm-seq (High)	Human	AC084082.1	rs1323938123	chr8:66113424..66113424	dbSNP153	RBP 24		GGAGGACTGTAGCTACTTCCTCAGCAGGAGACATCCTTAGGTCGCTGGTTCGATTCCGGCTCGAA	GGAGGACTGTAGCTACTTCCTCAGCAGGAGACTTCCTTAGGTCGCTGGTTCGATTCCGGCTCGAA
2'-O-Me	chr9:136548776(+)	Nm-seq (High)	Human	NALT1	rs577470380	chr9:136548776..136548776	dbSNP153	RBP 1		GCCCCTCCTTTGCGGCTGCTGTGGGGACTTTCGAGAGCAGAGCACACCCCTAAGTGCGTGGAGAG	GCCCCTCCTTTGCGGCTGCTGTGGGGACTTTCAAGAGCAGAGCACACCCCTAAGTGCGTGGAGAG
2'-O-Me	chr9:136548776(+)	Nm-seq (High)	Human	NALT1	rs577470380	chr9:136548776..136548776	dbSNP153	RBP 1		GCCCCTCCTTTGCGGCTGCTGTGGGGACTTTCGAGAGCAGAGCACACCCCTAAGTGCGTGGAGAG	GCCCCTCCTTTGCGGCTGCTGTGGGGACTTTCCAGAGCAGAGCACACCCCTAAGTGCGTGGAGAG
2'-O-Me	chr9:136726766(-)	Nm-seq (High)	Human	SNHG7,SNORA17A,AL355987.6	rs1474641157	chr9:136726758..136726766	dbSNP153	RBP 24 miRNA 8 circRNA 2		ACGCTCAGCGTTCTGCCCCGTGAACGTTTGAATGTTTGATAGTCTCACACTCCTGTTTTGTGGAC	ACGCTCAGCGTTCTGCCCCGTGAACGTTTGAA________AGTCTCACACTCCTGTTTTGTGGAC
2'-O-Me	chr9:136726766(-)	Nm-seq (High)	Human	SNHG7,SNORA17A,AL355987.6	rs748698225	chr9:136726766..136726766	dbSNP153	RBP 24 miRNA 8 circRNA 2		ACGCTCAGCGTTCTGCCCCGTGAACGTTTGAATGTTTGATAGTCTCACACTCCTGTTTTGTGGAC	ACGCTCAGCGTTCTGCCCCGTGAACGTTTGAACGTTTGATAGTCTCACACTCCTGTTTTGTGGAC
2'-O-Me	chr9:35657970(-)	Nm-seq (High)	Human	RMRP,RMRP:2	rs890235700	chr9:35657970..35657970	dbSNP153	RBP 24 miRNA 1 circRNA 3		CTGTATCCTAGGCTACACACTGAGGACTCTGTTCCTCCCCTTTCCGCCTAGGGGAAAGTCCCCGG	CTGTATCCTAGGCTACACACTGAGGACTCTGTGCCTCCCCTTTCCGCCTAGGGGAAAGTCCCCGG
2'-O-Me	chrX:109054163(+)	RiboMeth-seq&Nm-seq (High)	Human	lnc-COL4A5-3,RF02543-056	rs927453693	chrX:109054163..109054163	dbSNP153	RBP 24		GCGGCGGGTGTTGATGCGATGTGATTTCTGCCCAGTGCTCTGAATGTCAAAGTGAAGAAATTCAA	GCGGCGGGTGTTGATGCGATGTGATTTCTGCCAAGTGCTCTGAATGTCAAAGTGAAGAAATTCAA
2'-O-Me	chrX:109054163(+)	RiboMeth-seq&Nm-seq (High)	Human	lnc-COL4A5-3,RF02543-056	rs927453693	chrX:109054163..109054163	dbSNP153	RBP 24		GCGGCGGGTGTTGATGCGATGTGATTTCTGCCCAGTGCTCTGAATGTCAAAGTGAAGAAATTCAA	GCGGCGGGTGTTGATGCGATGTGATTTCTGCCTAGTGCTCTGAATGTCAAAGTGAAGAAATTCAA
2'-O-Me	chrX:73833326(-)	Nm-seq (High)	Human	XIST	rs755777990	chrX:73833326..73833326	dbSNP153	RBP 24 Splice 21 miRNA 2 circRNA 7		GAGACCTGAGGACTGCAAACAGCTATAAGAGGCTCCAAATTAATCATATCTTTCCCTTTGAGAAT	GAGACCTGAGGACTGCAAACAGCTATAAGAGGTTCCAAATTAATCATATCTTTCCCTTTGAGAAT
2'-O-Me	chrX:73842134(-)	Nm-seq (High)	Human	XIST	rs1239375110	chrX:73842134..73842134	dbSNP153	RBP 24 miRNA 1		GAAAGACATCTGGATTGTAGGGTGGACTCGATAACCTGGTCATTATTTTTTTGAAGCCAAAATAT	GAAAGACATCTGGATTGTAGGGTGGACTCGATGACCTGGTCATTATTTTTTTGAAGCCAAAATAT
2'-O-Me	chr1:11909838(+)	Nm-seq (High)	Human	AL021155.4	rs373272020	chr1:11909838..11909838	ICGC			AAGCCTTGCTAAAAAATGCAAGACCTCTAAAAAATTGGTTTAAAACTCAGAATTATTCCTCTCCA	AAGCCTTGCTAAAAAATGCAAGACCTCTAAAAGATTGGTTTAAAACTCAGAATTATTCCTCTCCA
2'-O-Me	chr1:93847655(+)	Nm-seq (High)	Human	AL049796.1	-	chr1:93847655..93847655	ICGC	RBP 25		TTCAAAGGTTCCGGGTTCGAGTCCCGGCGGAGTCGTAACGCTTTTTTCCCTCCCCCCTACAATTT	TTCAAAGGTTCCGGGTTCGAGTCCCGGCGGAGACGTAACGCTTTTTTCCCTCCCCCCTACAATTT
2'-O-Me	chr11:62852951(-)	Nm-seq (High)	Human	SNHG1,SNORD22	-	chr11:62852951..62852951	TCGA,ICGC	RBP 24 Splice 2 miRNA 1 circRNA 16		TGTAAAGGTGAACCCACTGGGACTGGCTGGGGGAGAAGAGGAAGATTTGTTCCAGAAGGAACTGT	TGTAAAGGTGAACCCACTGGGACTGGCTGGGGAAGAAGAGGAAGATTTGTTCCAGAAGGAACTGT
2'-O-Me	chr11:62841720(+)	Nm-seq (High)	Human	lnc-SLC3A2-6	rs897060843	chr11:62841720..62841720	ICGC			ATTCCATCTCCTATTTCCAAAAATCCATTTAATATATTGTCCTCGGATAGAGGACGTATCAGATA	ATTCCATCTCCTATTTCCAAAAATCCATTTAACATATTGTCCTCGGATAGAGGACGTATCAGATA
2'-O-Me	chr12:122982527(+)	Nm-seq (High)	Human	ARL6IP4,AC026362.1	-	chr12:122982527..122982527	TCGA,ICGC,COSMIC	RBP 6 Splice 21 circRNA 10		TAGAGGAAATCGTAACCAAAGAACGACACAGAGAGATCAACAAGGTGGGTGTGGCCCCTCTGCCT	TAGAGGAAATCGTAACCAAAGAACGACACAGATAGATCAACAAGGTGGGTGTGGCCCCTCTGCCT
2'-O-Me	chr16:68227524(+)	Nm-seq (High)	Human	AC020978.7,NFATC3	-	chr16:68227524..68227524	ICGC	RBP 3		ACATCAGCATGGGCAGAGAAAATACAGGACTCCAGATGGGAAGGTTTTAAGAGTCACACTGGCAT	ACATCAGCATGGGCAGAGAAAATACAGGACTCTAGATGGGAAGGTTTTAAGAGTCACACTGGCAT
2'-O-Me	chr16:88738931(+)	Nm-seq (High)	Human	AC138028.2	rs909553080	chr16:88738931..88738931	ICGC			AGGTCTGCCTGACACCTTCCTACTTCCTCACTCAAGCTCACAGTTCCTGCAGGCCTTCCTGGTAG	AGGTCTGCCTGACACCTTCCTACTTCCTCACTGAAGCTCACAGTTCCTGCAGGCCTTCCTGGTAG
2'-O-Me	chr17:78499130(+)	Nm-seq (High)	Human	DNAH17-AS1	-	chr17:78499130..78499130	ICGC	RBP 2		GATATTTCCACAGGACTGGAAAGGGCGAGATGGAGAAAGGAAGAGCTGGGAGGGTGACAGGGAGG	GATATTTCCACAGGACTGGAAAGGGCGAGATGAAGAAAGGAAGAGCTGGGAGGGTGACAGGGAGG
2'-O-Me	chr17:20231823(+)	Nm-seq (High)	Human	SPECC1,AC004702.1	-	chr17:20231823..20231823	COSMIC	RBP 4 Splice 21 circRNA 27		ACCTGGAGAGGCAGCTGAAGACTCTGACCAAGCAGATGAAGGTGAGATGCGGGTGGGAGCCTTCA	ACCTGGAGAGGCAGCTGAAGACTCTGACCAAGTAGATGAAGGTGAGATGCGGGTGGGAGCCTTCA
2'-O-Me	chr20:38433928(-)	Nm-seq (High)	Human	SNORA71D,SNHG17	-	chr20:38433928..38433928	ICGC	RBP 24		GGTCATTGATAGTGCAGGGAGAGAAATCGCGGAAAGTGCTTCCCCGTGTTTGGAGGGTCCGCTCC	GGTCATTGATAGTGCAGGGAGAGAAATCGCGGGAAGTGCTTCCCCGTGTTTGGAGGGTCCGCTCC
2'-O-Me	chr20:49278975(+)	Nm-seq (High)	Human	ZFAS1,SNORD12C	-	chr20:49278975..49278975	TCGA,ICGC	RBP 25		GGTGTAAATGATGACTTCACTTTTTTCCCCATCAGATCGACAATGCTGACGTCTTATATTTTGCC	GGTGTAAATGATGACTTCACTTTTTTCCCCATGAGATCGACAATGCTGACGTCTTATATTTTGCC
2'-O-Me	chr7:44985466(-)	Nm-seq (High)	Human	SNHG15,SNORA9	-	chr7:44985466..44985466	ICGC	RBP 24 miRNA 1		AGCGTGCTTGGGTCTGCGGTGACCCTATGCATTCCTTCAGTGCTTGCTAGAACAGTTTTGAAACG	AGCGTGCTTGGGTCTGCGGTGACCCTATGCATCCCTTCAGTGCTTGCTAGAACAGTTTTGAAACG
2'-O-Me	chr7:44985466(-)	Nm-seq (High)	Human	SNHG15,SNORA9	-	chr7:44985466..44985466	TCGA	RBP 24 miRNA 1		AGCGTGCTTGGGTCTGCGGTGACCCTATGCATTCCTTCAGTGCTTGCTAGAACAGTTTTGAAACG	AGCGTGCTTGGGTCTGCGGTGACCCTATGCATGCCTTCAGTGCTTGCTAGAACAGTTTTGAAACG
2'-O-Me	chr7:100359021(+)	Nm-seq (High)	Human	PILRB,STAG3L5P-PVRIG2P-PILRB	-	chr7:100359021..100359021	TCGA,ICGC	RBP 9 Splice 6 circRNA 7		GTGTATTTCTGCCGAGTCGAGCTGGACACCCGGAGATCAGGGAGGCAGCAGTTGCAGTCCATCAA	GTGTATTTCTGCCGAGTCGAGCTGGACACCCGAAGATCAGGGAGGCAGCAGTTGCAGTCCATCAA

## Sheet: pseudoU
Modification Type	Chromosome Position	Source	Species	Gene	Genetic Variant(s)	SNP Position	Database	Transcriptome Regulation	Disease	Nucleotide Ref Seq	Nucleotide Alt Seq
pseudouridine	chr1:93847599(+)	DM-Ψ-seq (High)	Human	AL049796.1	-	chr1:93847599..93847599	ICGC	RBP 24		ACAGGTGGCTCCGTGGCGCAATGGATAGCGCATTGGACTTCTAGAGGCTGAAGGCATTCAAAGGT	ACAGGTGGCTCCGTGGCGCAATGGATAGCGCAGTGGACTTCTAGAGGCTGAAGGCATTCAAAGGT
pseudouridine	chr15:45201203(+)	DM-Ψ-seq (High)	Human	tRNA-His-GTG-1-1,tRNA-His-GTG-2-1,lnc-DUOX1-2	rs555263499	chr15:45201203..45201203	ICGC	RBP 10		AGTACTCTGCGTTGTGGCCGCAGCAACCTCGGTTCGAATCCGAGTCACGGCATTGTGGAAACAAT	AGTACTCTGCGTTGTGGCCGCAGCAACCTCGGCTCGAATCCGAGTCACGGCATTGTGGAAACAAT
pseudouridine	chr15:89335111(+)	DM-Ψ-seq (High)	Human	AC124068.2	rs1186956056	chr15:89335111..89335111	ICGC	RBP 25		GTGGCCTAATGGATAAGGCGTCTGACTTCGGATCAGAAGATTGCAGGTTCGAGTCCTGCCGCGGT	GTGGCCTAATGGATAAGGCGTCTGACTTCGGAACAGAAGATTGCAGGTTCGAGTCCTGCCGCGGT
pseudouridine	chr16:3192001(+)	DM-Ψ-seq (High)	Human	AJ003147.2	rs2238394	chr16:3191999..3191999	ICGC	RBP 13		AGTAAAGGGCCTGCTGCTGTGGCTCGTTGGTCTAGGGGTATGATTCTCGCTTAGGATGCGAGAGG	AGTAAAGGGCCTGCTGCTGTGGCTCGTTGGCCTAGGGGTATGATTCTCGCTTAGGATGCGAGAGG
pseudouridine	chr2:42810570(+)	DM-Ψ-seq (High)	Human	lnc-MTA3-5,lnc-MTA3-6,TRI-TAT2-1,tRNA-Ile-TAT-2-1	-	chr2:42810570..42810570	ICGC	RBP 24		TCCAGTGGCGCAATCGGTTAGCGCGCGGTACTTATACAGCAGTACATGCAGAGCAATGCCGAGGT	TCCAGTGGCGCAATCGGTTAGCGCGCGGTACTAATACAGCAGTACATGCAGAGCAATGCCGAGGT
pseudouridine	chr2:42810571(-)	Ψ-seq (High)	Human	lnc-HAAO-1,lnc-HAAO-1:2	-	chr2:42810570..42810570	ICGC			AACCTCGGCATTGCTCTGCATGTACTGCTGTATAAGTACCGCGCGCTAACCGATTGCGCCACTGG	AACCTCGGCATTGCTCTGCATGTACTGCTGTATTAGTACCGCGCGCTAACCGATTGCGCCACTGG
pseudouridine	chr20:49280549(+)	RBS_seq (High)	Human	ZFAS1,AL049766.3	-	chr20:49280547..49280549	TCGA,ICGC	RBP 20 Splice 16 miRNA 2 circRNA 6		AACCAGGATGAATGCGGGTGTTGGAAGTAGAATATATATATACATATAAAATTGGTAAGTGGTGC	AACCAGGATGAATGCGGGTGTTGGAAGTAGA__ATATATATACATATAAAATTGGTAAGTGGTGC
pseudouridine	chr6:27158139(+)	DM-Ψ-seq (High)	Human	tRNA-His-GTG-1-1,lnc-HIST1H2AH-5,tRNA-His-GTG-2-1	-	chr6:27158137..27158137	ICGC	RBP 17		GCAGCGGCCTCTGGTGGCGTGCCGTGATCGTATAGTGGTTAGTACTCTGCGTTGTGGCCGCAGCA	GCAGCGGCCTCTGGTGGCGTGCCGTGATCGCATAGTGGTTAGTACTCTGCGTTGTGGCCGCAGCA
pseudouridine	chr7:116954456(+)	CeU-seq (High)	Human	ST7,ST7-OT4	-	chr7:116954421..116954454	ICGC	RBP 3		TTTCAGTGATCTTTGCTCGTCTCCCTTCCCTGTAAAGCTACATATGCTCAGCAAGTGCCGCGTGC	_______________________________TGTAAAGCTACATATGCTCAGCAAGTGCCGCGTG
pseudouridine	chr10:87864504(-)	CeU-seq (High)	Human	lnc-KLLN-2,lnc-KLLN-2:2	rs786204882	chr10:87864488..87864505	dbSNP153		Clinvar_Rec_6427,Clinvar_Rec_14664	AGTCGAATCCATCCTCTTGATATCTCCTTTTGTTTCTGCTAACGATCTCTTTGATGATGGCTGTC	AGTCGAATCCATCCTCTTGATATCTCCTTTT_________________CTTTGATGATGGCTGTC
pseudouridine	chr10:87864504(-)	CeU-seq (High)	Human	lnc-KLLN-2,lnc-KLLN-2:2	rs1085308044	chr10:87864504..87864504	dbSNP153		Clinvar_Rec_6428,Clinvar_Rec_14665	AGTCGAATCCATCCTCTTGATATCTCCTTTTGTTTCTGCTAACGATCTCTTTGATGATGGCTGTC	AGTCGAATCCATCCTCTTGATATCTCCTTTTGGTTCTGCTAACGATCTCTTTGATGATGGCTGTC
pseudouridine	chr11:111777817(-)	CeU-seq (High)	Human	AP001781.1	rs1466187920	chr11:111777817..111777817	dbSNP153	RBP 1		TCTCACCTCTTTCTTGTCTCCCTGTTACTGTGTCTCTAAGCCTCCCTGGTATTTCCTATAATGTG	TCTCACCTCTTTCTTGTCTCCCTGTTACTGTGACTCTAAGCCTCCCTGGTATTTCCTATAATGTG
pseudouridine	chr11:118401928(-)	CeU-seq (High)	Human	LOC100131626,LOC100131626:2	rs781907142	chr11:118401928..118401928	dbSNP153			CTTCCCAGTCGTGGTTAGAATTCAGGAACTTCTAGGTTGTGTAGAGAACCCAATCTGCAGGTCAG	CTTCCCAGTCGTGGTTAGAATTCAGGAACTTCCAGGTTGTGTAGAGAACCCAATCTGCAGGTCAG
pseudouridine	chr11:59551320(+)	DM-Ψ-seq (High)	Human	AP003778.1	rs1160236399	chr11:59551308..59551320	dbSNP153	RBP 16		GTGTCTGGCTCTGTGGCGCAATGGATAGCGCATTGGACTTCTAGATAGTTAGAGAAATTCAAAGG	GTGTCTGGCTCTGTGGCGCAA____________TGGACTTCTAGATAGTTAGAGAAATTCAAAGG
pseudouridine	chr11:59551329(+)	DM-Ψ-seq (High)	Human	AP003778.1	rs1043722791	chr11:59551330..59551330	dbSNP153	RBP 24		TCTGTGGCGCAATGGATAGCGCATTGGACTTCTAGATAGTTAGAGAAATTCAAAGGTTGTGGGTT	TCTGTGGCGCAATGGATAGCGCATTGGACTTCTGGATAGTTAGAGAAATTCAAAGGTTGTGGGTT
pseudouridine	chr11:59551329(+)	DM-Ψ-seq (High)	Human	AP003778.1	rs1453239582	chr11:59551330..59551330	dbSNP153	RBP 24		TCTGTGGCGCAATGGATAGCGCATTGGACTTCTA_GATAGTTAGAGAAATTCAAAGGTTGTGGGT	TCTGTGGCGCAATGGATAGCGCATTGGACTTCTATGATAGTTAGAGAAATTCAAAGGTTGTGGGT
pseudouridine	chr11:59551329(+)	DM-Ψ-seq (High)	Human	AP003778.1	rs975525142	chr11:59551331..59551331	dbSNP153	RBP 24		TCTGTGGCGCAATGGATAGCGCATTGGACTTCTAGATAGTTAGAGAAATTCAAAGGTTGTGGGTT	TCTGTGGCGCAATGGATAGCGCATTGGACTTCTACATAGTTAGAGAAATTCAAAGGTTGTGGGTT
pseudouridine	chr11:59551333(+)	DM-Ψ-seq (High)	Human	AP003778.1	rs1386462953	chr11:59551333..59551333	dbSNP153	RBP 24		TGGCGCAATGGATAGCGCATTGGACTTCTAGATAGTTAGAGAAATTCAAAGGTTGTGGGTTCGAG	TGGCGCAATGGATAGCGCATTGGACTTCTAGAGAGTTAGAGAAATTCAAAGGTTGTGGGTTCGAG
pseudouridine	chr11:59551346(+)	DM-Ψ-seq (High)	Human	AP003778.1	rs904798629	chr11:59551346..59551346	dbSNP153	RBP 24		AGCGCATTGGACTTCTAGATAGTTAGAGAAATTCAAAGGTTGTGGGTTCGAGTCCCACCAGAGTC	AGCGCATTGGACTTCTAGATAGTTAGAGAAATGCAAAGGTTGTGGGTTCGAGTCCCACCAGAGTC
pseudouridine	chr11:59551782(+)	DM-Ψ-seq (High)	Human	AP003778.1	rs1364289614	chr11:59551782..59551782	dbSNP153	RBP 20		CAGTTACCAGAATGGCCGAGTGGTTAAGGCGTTGGACTTAAGATCCAATGGATTCATATCCGCGT	CAGTTACCAGAATGGCCGAGTGGTTAAGGCGTCGGACTTAAGATCCAATGGATTCATATCCGCGT
pseudouridine	chr11:59551793(+)	DM-Ψ-seq (High)	Human	AP003778.1	rs1279799437	chr11:59551793..59551793	dbSNP153	RBP 24		ATGGCCGAGTGGTTAAGGCGTTGGACTTAAGATCCAATGGATTCATATCCGCGTGGGTTCGAACC	ATGGCCGAGTGGTTAAGGCGTTGGACTTAAGAGCCAATGGATTCATATCCGCGTGGGTTCGAACC
pseudouridine	chr11:59556455(+)	DM-Ψ-seq (High)	Human	AP003778.1	rs1039496396	chr11:59556455..59556455	dbSNP153	RBP 24		TCAGGGGCCCGGATAGCTCAGTCGGTAGAGCATCAGACTTTTAATCTGAGGGTCCGGGGTTCAAG	TCAGGGGCCCGGATAGCTCAGTCGGTAGAGCACCAGACTTTTAATCTGAGGGTCCGGGGTTCAAG
pseudouridine	chr11:59556455(+)	DM-Ψ-seq (High)	Human	AP003778.1	rs1039496396	chr11:59556455..59556455	dbSNP153	RBP 24		TCAGGGGCCCGGATAGCTCAGTCGGTAGAGCATCAGACTTTTAATCTGAGGGTCCGGGGTTCAAG	TCAGGGGCCCGGATAGCTCAGTCGGTAGAGCAGCAGACTTTTAATCTGAGGGTCCGGGGTTCAAG
pseudouridine	chr11:59556467(+)	DM-Ψ-seq (High)	Human	AP003778.1	rs1315020269	chr11:59556467..59556467	dbSNP153	RBP 19		ATAGCTCAGTCGGTAGAGCATCAGACTTTTAATCTGAGGGTCCGGGGTTCAAGTCCCTGTTCGGG	ATAGCTCAGTCGGTAGAGCATCAGACTTTTAAACTGAGGGTCCGGGGTTCAAGTCCCTGTTCGGG
pseudouridine	chr11:59556467(+)	DM-Ψ-seq (High)	Human	AP003778.1	rs1315020269	chr11:59556467..59556467	dbSNP153	RBP 19		ATAGCTCAGTCGGTAGAGCATCAGACTTTTAATCTGAGGGTCCGGGGTTCAAGTCCCTGTTCGGG	ATAGCTCAGTCGGTAGAGCATCAGACTTTTAACCTGAGGGTCCGGGGTTCAAGTCCCTGTTCGGG
pseudouridine	chr11:59560361(-)	DM-Ψ-seq (High)	Human	LINC02739	rs768226951	chr11:59560361..59560361	dbSNP153	RBP 13		GTCGGTAGAGCATCAGACTTTTAATCTGAGGGTCCAGGGTTCAAGTCCCTGTTCGGGCGGTATCT	GTCGGTAGAGCATCAGACTTTTAATCTGAGGGGCCAGGGTTCAAGTCCCTGTTCGGGCGGTATCT
pseudouridine	chr11:59560361(-)	DM-Ψ-seq (High)	Human	LINC02739	rs768226951	chr11:59560361..59560361	dbSNP153	RBP 13		GTCGGTAGAGCATCAGACTTTTAATCTGAGGGTCCAGGGTTCAAGTCCCTGTTCGGGCGGTATCT	GTCGGTAGAGCATCAGACTTTTAATCTGAGGGCCCAGGGTTCAAGTCCCTGTTCGGGCGGTATCT
pseudouridine	chr11:59566418(+)	DM-Ψ-seq (High)	Human	AP000442.1	rs1478433587	chr11:59566418..59566418	dbSNP153			AACCCGGGATTGAACCAGGGACCTTTAGATCTTCAGTCTAACGCTCTCCCAACTGAGCTATTTCG	AACCCGGGATTGAACCAGGGACCTTTAGATCTGCAGTCTAACGCTCTCCCAACTGAGCTATTTCG
pseudouridine	chr11:65502897(-)	CeU-seq (High)	Human	TALAM1-001,TALAM1-001:2,TALAM1-001:3,TALAM1-001:4,L13304-001,L13705-009,TALAM1-001:5,TALAM1-001:6	rs1372368598	chr11:65502897..65502897	dbSNP153	circRNA 2		TCTCATCAATTCATTATTTTTGTGGTTATAGCTTGACAAGCAATTAACTTTAAAATGGTAGATTC	TCTCATCAATTCATTATTTTTGTGGTTATAGCCTGACAAGCAATTAACTTTAAAATGGTAGATTC
pseudouridine	chr11:65503352(-)	Ψ-seq (High)	Human	TALAM1-001,TALAM1-001:2,TALAM1-001:3,TALAM1-001:4,L13304-001,L13705-009,TALAM1-001:5,TALAM1-001:6	rs1364679762	chr11:65503352..65503352	dbSNP153	circRNA 2		ATCCCATCACTGAAGCCCACAGGAACAAGTCCTACAATTTTAAAAAGGCTCGATGGAAAAATTTC	ATCCCATCACTGAAGCCCACAGGAACAAGTCCCACAATTTTAAAAAGGCTCGATGGAAAAATTTC
pseudouridine	chr11:66348158(+)	DM-Ψ-seq (High)	Human	AP001107.9	rs1365672044	chr11:66348158..66348158	dbSNP153	RBP 25		GTGGCCGAGTGGTTAAGGCGATGGACTGCTAATCCATTGTGCTTTGCACGCGTGGGTTCGAATCC	GTGGCCGAGTGGTTAAGGCGATGGACTGCTAAGCCATTGTGCTTTGCACGCGTGGGTTCGAATCC
pseudouridine	chr11:66348165(+)	DM-Ψ-seq (High)	Human	AP001107.9	rs562891103	chr11:66348165..66348165	dbSNP153	RBP 25		AGTGGTTAAGGCGATGGACTGCTAATCCATTGTGCTTTGCACGCGTGGGTTCGAATCCCATCCTC	AGTGGTTAAGGCGATGGACTGCTAATCCATTGCGCTTTGCACGCGTGGGTTCGAATCCCATCCTC
pseudouridine	chr11:93721658(+)	CeU-seq (High)	Human	SCARNA9,CEP295	rs754962600	chr11:93721656..93721658	dbSNP153	RBP 11 miRNA 2 circRNA 28		AAACTATAAAACAATGTAAAACAATAAGGGCATATGTCTGGTGTGTGTGTGTGTGTGTGTGTGTG	AAACTATAAAACAATGTAAAACAATAAGGGC__ATGTCTGGTGTGTGTGTGTGTGTGTGTGTGTG
pseudouridine	chr12:50113107(+)	CeU-seq (High)	Human	AC074032.1,COX14	rs921960302	chr12:50113107..50113107	dbSNP153	RBP 1 circRNA 2		ATGTTGCCCAACCTGGTCTCCAACTCCTGAGCTCAAGCCATCCTCCCGCCTCGGCCTCCCAAAGT	ATGTTGCCCAACCTGGTCTCCAACTCCTGAGCCCAAGCCATCCTCCCGCCTCGGCCTCCCAAAGT
pseudouridine	chr12:50120312(+)	RBS_seq (High)	Human	AC074032.1,COX14	rs11552774	chr12:50120312..50120312	dbSNP153	RBP 5 miRNA 1 circRNA 4		GCCACCATTTCCAGGTCAACAGGACTAGAGCGTTGATGGTTTTCAAACCCTGTTGGAAGAAAGTG	GCCACCATTTCCAGGTCAACAGGACTAGAGCGATGATGGTTTTCAAACCCTGTTGGAAGAAAGTG
pseudouridine	chr12:53453943(+)	CeU-seq (High)	Human	PCBP2,AC023509.1	rs768664368	chr12:53453943..53453943	dbSNP153	RBP 7 circRNA 2		AAAAATTTTAGCAATGCCAGTTTTATTTTGATTGTTTTCTTTGGAAGGAAATTTAAGATTTAATA	AAAAATTTTAGCAATGCCAGTTTTATTTTGATAGTTTTCTTTGGAAGGAAATTTAAGATTTAATA
pseudouridine	chr12:96036033(+)	DM-Ψ-seq (High)	Human	tRNA-Asp-GTC-2-1,NONHSAG011990.2,NONHSAG011990.2:2,TRD-GTC2-10	rs1383402942	chr12:96036031..96036031	dbSNP153	RBP 16		AAGGCTTTCTTTCGTGCGGTTCCTCGTTAGTATAGTGGTGAGTATCCCCGCCTGTCACGCGGGAG	AAGGCTTTCTTTCGTGCGGTTCCTCGTTAGCATAGTGGTGAGTATCCCCGCCTGTCACGCGGGAG
pseudouridine	chr12:96036033(+)	DM-Ψ-seq (High)	Human	tRNA-Asp-GTC-2-1,NONHSAG011990.2,NONHSAG011990.2:2,TRD-GTC2-10	rs1043502320	chr12:96036033..96036033	dbSNP153	RBP 16		AAGGCTTTCTTTCGTGCGGTTCCTCGTTAGTATAGTGGTGAGTATCCCCGCCTGTCACGCGGGAG	AAGGCTTTCTTTCGTGCGGTTCCTCGTTAGTACAGTGGTGAGTATCCCCGCCTGTCACGCGGGAG
pseudouridine	chr12:96036074(+)	DM-Ψ-seq (High)	Human	tRNA-Asp-GTC-2-1,NONHSAG011990.2,NONHSAG011990.2:2,AB330774-001,AB330774-001:2,TRD-GTC2-10	rs1343886628	chr12:96036074..96036074	dbSNP153	RBP 17		GTATCCCCGCCTGTCACGCGGGAGACCGGGGTTCGATTCCCCGACGGGGAGGCACAGTAATTGTT	GTATCCCCGCCTGTCACGCGGGAGACCGGGGTCCGATTCCCCGACGGGGAGGCACAGTAATTGTT
pseudouridine	chr12:96036074(+)	DM-Ψ-seq (High)	Human	tRNA-Asp-GTC-2-1,NONHSAG011990.2,NONHSAG011990.2:2,AB330774-001,AB330774-001:2,TRD-GTC2-10	rs1343886628	chr12:96036074..96036074	dbSNP153	RBP 17		GTATCCCCGCCTGTCACGCGGGAGACCGGGGTTCGATTCCCCGACGGGGAGGCACAGTAATTGTT	GTATCCCCGCCTGTCACGCGGGAGACCGGGGTGCGATTCCCCGACGGGGAGGCACAGTAATTGTT
pseudouridine	chr12:98503515(+)	DM-Ψ-seq (High)	Human	tRNA-Asp-GTC-1-1,lnc-TMPO-1	rs1408172518	chr12:98503515..98503515	dbSNP153	RBP 25		AAAATACACAGCCTAACGACTCCTCGTTAGTATAGTGGTTAGTATCCCCGCCTGTCACGCGGGAG	AAAATACACAGCCTAACGACTCCTCGTTAGTAGAGTGGTTAGTATCCCCGCCTGTCACGCGGGAG
pseudouridine	chr12:98503515(+)	DM-Ψ-seq (High)	Human	tRNA-Asp-GTC-1-1,lnc-TMPO-1	rs1020502335	chr12:98503516..98503516	dbSNP153	RBP 25		AAAATACACAGCCTAACGACTCCTCGTTAGTATAGTGGTTAGTATCCCCGCCTGTCACGCGGGAG	AAAATACACAGCCTAACGACTCCTCGTTAGTATGGTGGTTAGTATCCCCGCCTGTCACGCGGGAG
pseudouridine	chr12:98503515(+)	DM-Ψ-seq (High)	Human	tRNA-Asp-GTC-1-1,lnc-TMPO-1	rs1173161225	chr12:98503517..98503517	dbSNP153	RBP 25		AAAATACACAGCCTAACGACTCCTCGTTAGTATAGTGGTTAGTATCCCCGCCTGTCACGCGGGAG	AAAATACACAGCCTAACGACTCCTCGTTAGTATACTGGTTAGTATCCCCGCCTGTCACGCGGGAG
pseudouridine	chr12:98503556(+)	DM-Ψ-seq (High)	Human	tRNA-Asp-GTC-1-1,lnc-TMPO-1	rs1189972218	chr12:98503556..98503556	dbSNP153	RBP 24		GTATCCCCGCCTGTCACGCGGGAGACCGGGGTTCAATTCCCCGACGGGGAGGTGTGTAGCTGCAC	GTATCCCCGCCTGTCACGCGGGAGACCGGGGTCCAATTCCCCGACGGGGAGGTGTGTAGCTGCAC
pseudouridine	chr14:20625390(+)	DM-Ψ-seq (High)	Human	lnc-RNASE4-2,tRNA-Leu-TAG-2-1,piR-36318	rs772662467	chr14:20625391..20625391	dbSNP153	RBP 24		TATAACGTGTGTGGTAGTGTGGCCGAGCGGTCTAAGGCGCTGGATTTAGGCTCCAGTCTCTTCGG	TATAACGTGTGTGGTAGTGTGGCCGAGCGGTCTCAGGCGCTGGATTTAGGCTCCAGTCTCTTCGG
pseudouridine	chr14:20625390(+)	DM-Ψ-seq (High)	Human	lnc-RNASE4-2,tRNA-Leu-TAG-2-1,piR-36318	rs772662467	chr14:20625391..20625391	dbSNP153	RBP 24		TATAACGTGTGTGGTAGTGTGGCCGAGCGGTCTAAGGCGCTGGATTTAGGCTCCAGTCTCTTCGG	TATAACGTGTGTGGTAGTGTGGCCGAGCGGTCTGAGGCGCTGGATTTAGGCTCCAGTCTCTTCGG
pseudouridine	chr14:20625390(+)	DM-Ψ-seq (High)	Human	lnc-RNASE4-2,tRNA-Leu-TAG-2-1,piR-36318	rs772662467	chr14:20625391..20625391	dbSNP153	RBP 24		TATAACGTGTGTGGTAGTGTGGCCGAGCGGTCTAAGGCGCTGGATTTAGGCTCCAGTCTCTTCGG	TATAACGTGTGTGGTAGTGTGGCCGAGCGGTCTTAGGCGCTGGATTTAGGCTCCAGTCTCTTCGG
pseudouridine	chr14:20625390(+)	DM-Ψ-seq (High)	Human	lnc-RNASE4-2,tRNA-Leu-TAG-2-1,piR-36318	rs977700119	chr14:20625392..20625392	dbSNP153	RBP 24		TATAACGTGTGTGGTAGTGTGGCCGAGCGGTCTAAGGCGCTGGATTTAGGCTCCAGTCTCTTCGG	TATAACGTGTGTGGTAGTGTGGCCGAGCGGTCTACGGCGCTGGATTTAGGCTCCAGTCTCTTCGG
pseudouridine	chr14:20625402(+)	DM-Ψ-seq (High)	Human	lnc-RNASE4-2,tRNA-Leu-TAG-2-1	rs575467692	chr14:20625402..20625402	dbSNP153	RBP 24		GGTAGTGTGGCCGAGCGGTCTAAGGCGCTGGATTTAGGCTCCAGTCTCTTCGGGGGCGTGGGTTC	GGTAGTGTGGCCGAGCGGTCTAAGGCGCTGGACTTAGGCTCCAGTCTCTTCGGGGGCGTGGGTTC
pseudouridine	chr14:20625409(+)	DM-Ψ-seq (High)	Human	lnc-RNASE4-2,tRNA-Leu-TAG-2-1	rs1379971926	chr14:20625409..20625409	dbSNP153	RBP 24		TGGCCGAGCGGTCTAAGGCGCTGGATTTAGGCTCCAGTCTCTTCGGGGGCGTGGGTTCGAATCCC	TGGCCGAGCGGTCTAAGGCGCTGGATTTAGGCCCCAGTCTCTTCGGGGGCGTGGGTTCGAATCCC
pseudouridine	chr14:20625409(+)	DM-Ψ-seq (High)	Human	lnc-RNASE4-2,tRNA-Leu-TAG-2-1	rs1379971926	chr14:20625409..20625409	dbSNP153	RBP 24		TGGCCGAGCGGTCTAAGGCGCTGGATTTAGGCTCCAGTCTCTTCGGGGGCGTGGGTTCGAATCCC	TGGCCGAGCGGTCTAAGGCGCTGGATTTAGGCGCCAGTCTCTTCGGGGGCGTGGGTTCGAATCCC
pseudouridine	chr14:20625416(+)	DM-Ψ-seq (High)	Human	lnc-RNASE4-2,tRNA-Leu-TAG-2-1	rs1259344080	chr14:20625416..20625416	dbSNP153	RBP 24		GCGGTCTAAGGCGCTGGATTTAGGCTCCAGTCTCTTCGGGGGCGTGGGTTCGAATCCCACCACTG	GCGGTCTAAGGCGCTGGATTTAGGCTCCAGTCCCTTCGGGGGCGTGGGTTCGAATCCCACCACTG
pseudouridine	chr14:20625418(+)	DM-Ψ-seq (High)	Human	lnc-RNASE4-2,tRNA-Leu-TAG-2-1	rs564579301	chr14:20625418..20625418	dbSNP153	RBP 24		GGTCTAAGGCGCTGGATTTAGGCTCCAGTCTCTTCGGGGGCGTGGGTTCGAATCCCACCACTGCC	GGTCTAAGGCGCTGGATTTAGGCTCCAGTCTCCTCGGGGGCGTGGGTTCGAATCCCACCACTGCC
pseudouridine	chr14:20633018(+)	DM-Ψ-seq (High)	Human	lnc-RNASE4-1,piR-31368,tRNA-Pro-TGG-1-1	rs371629516	chr14:20633016..20633016	dbSNP153	RBP 24		AATAGAATCTCTCCAGTTCTGGCTCGTTGGTCTAGTGGTATGATTCTCGCTTTGGGTGCGAGAGG	AATAGAATCTCTCCAGTTCTGGCTCGTTGGCCTAGTGGTATGATTCTCGCTTTGGGTGCGAGAGG
pseudouridine	chr14:20633018(+)	DM-Ψ-seq (High)	Human	lnc-RNASE4-1,piR-31368,tRNA-Pro-TGG-1-1	rs919714305	chr14:20633018..20633018	dbSNP153	RBP 24		AATAGAATCTCTCCAGTTCTGGCTCGTTGGTCTAGTGGTATGATTCTCGCTTTGGGTGCGAGAGG	AATAGAATCTCTCCAGTTCTGGCTCGTTGGTCCAGTGGTATGATTCTCGCTTTGGGTGCGAGAGG
pseudouridine	chr14:20633018(+)	DM-Ψ-seq (High)	Human	lnc-RNASE4-1,piR-31368,tRNA-Pro-TGG-1-1	rs919714305	chr14:20633018..20633018	dbSNP153	RBP 24		AATAGAATCTCTCCAGTTCTGGCTCGTTGGTCTAGTGGTATGATTCTCGCTTTGGGTGCGAGAGG	AATAGAATCTCTCCAGTTCTGGCTCGTTGGTCGAGTGGTATGATTCTCGCTTTGGGTGCGAGAGG
pseudouridine	chr14:20633018(+)	DM-Ψ-seq (High)	Human	lnc-RNASE4-1,piR-31368,tRNA-Pro-TGG-1-1	rs930094356	chr14:20633019..20633019	dbSNP153	RBP 24		AATAGAATCTCTCCAGTTCTGGCTCGTTGGTCTAGTGGTATGATTCTCGCTTTGGGTGCGAGAGG	AATAGAATCTCTCCAGTTCTGGCTCGTTGGTCTCGTGGTATGATTCTCGCTTTGGGTGCGAGAGG
pseudouridine	chr14:20633018(+)	DM-Ψ-seq (High)	Human	lnc-RNASE4-1,piR-31368,tRNA-Pro-TGG-1-1	rs930094356	chr14:20633019..20633019	dbSNP153	RBP 24		AATAGAATCTCTCCAGTTCTGGCTCGTTGGTCTAGTGGTATGATTCTCGCTTTGGGTGCGAGAGG	AATAGAATCTCTCCAGTTCTGGCTCGTTGGTCTGGTGGTATGATTCTCGCTTTGGGTGCGAGAGG
pseudouridine	chr14:20633018(+)	DM-Ψ-seq (High)	Human	lnc-RNASE4-1,piR-31368,tRNA-Pro-TGG-1-1	rs1248886796	chr14:20633020..20633020	dbSNP153	RBP 24		AATAGAATCTCTCCAGTTCTGGCTCGTTGGTCTAGTGGTATGATTCTCGCTTTGGGTGCGAGAGG	AATAGAATCTCTCCAGTTCTGGCTCGTTGGTCTATTGGTATGATTCTCGCTTTGGGTGCGAGAGG
pseudouridine	chr14:20633036(+)	DM-Ψ-seq (High)	Human	lnc-RNASE4-1,tRNA-Pro-TGG-1-1	rs1280592730	chr14:20633036..20633036	dbSNP153	RBP 24		CTGGCTCGTTGGTCTAGTGGTATGATTCTCGCTTTGGGTGCGAGAGGTCCCGGGTTCAAATCCCG	CTGGCTCGTTGGTCTAGTGGTATGATTCTCGCCTTGGGTGCGAGAGGTCCCGGGTTCAAATCCCG
pseudouridine	chr14:20633036(+)	DM-Ψ-seq (High)	Human	lnc-RNASE4-1,tRNA-Pro-TGG-1-1	rs1280592730	chr14:20633036..20633036	dbSNP153	RBP 24		CTGGCTCGTTGGTCTAGTGGTATGATTCTCGCTTTGGGTGCGAGAGGTCCCGGGTTCAAATCCCG	CTGGCTCGTTGGTCTAGTGGTATGATTCTCGCGTTGGGTGCGAGAGGTCCCGGGTTCAAATCCCG
pseudouridine	chr14:20633058(+)	DM-Ψ-seq (High)	Human	lnc-RNASE4-1,tRNA-Pro-TGG-1-1	rs1403442416	chr14:20633058..20633058	dbSNP153	RBP 4		TGATTCTCGCTTTGGGTGCGAGAGGTCCCGGGTTCAAATCCCGGACGAGCCCCTTTACTTTCCTT	TGATTCTCGCTTTGGGTGCGAGAGGTCCCGGGGTCAAATCCCGGACGAGCCCCTTTACTTTCCTT
pseudouridine	chr14:20633059(+)	DM-Ψ-seq (High)	Human	lnc-RNASE4-1,tRNA-Pro-TGG-1-1	rs1395503297	chr14:20633059..20633059	dbSNP153	RBP 4		GATTCTCGCTTTGGGTGCGAGAGGTCCCGGGTTCAAATCCCGGACGAGCCCCTTTACTTTCCTTT	GATTCTCGCTTTGGGTGCGAGAGGTCCCGGGTCCAAATCCCGGACGAGCCCCTTTACTTTCCTTT
pseudouridine	chr14:20659992(-)	DM-Ψ-seq (High)	Human	tRNA-Tyr,lnc-OR6S1-2,tRNA-Tyr-GTA-7-1,TRY-GTA1-1,TRY-GTA7-1	rs1256129152	chr14:20659992..20659992	dbSNP153	RBP 10		AGGACTGTAGACTGCGGAAACGTTTGTGGACATCCTTAGGTCGCTGGTTCAATTCCGGCTCGAAG	AGGACTGTAGACTGCGGAAACGTTTGTGGACAACCTTAGGTCGCTGGTTCAATTCCGGCTCGAAG
pseudouridine	chr14:22929739(+)	DM-Ψ-seq (High)	Human	AL132780.1	rs1461446956	chr14:22929739..22929739	dbSNP153	RBP 13 Splice 3		GTGGCGCAATGGATAACGCGTCTGACTACGGATCAGAAGATTCCAGGTTCGACTCCTGGCTGGCT	GTGGCGCAATGGATAACGCGTCTGACTACGGAGCAGAAGATTCCAGGTTCGACTCCTGGCTGGCT
pseudouridine	chr14:22929754(+)	DM-Ψ-seq (High)	Human	AL132780.1	rs1008126984	chr14:22929754..22929754	dbSNP153	RBP 18		ACGCGTCTGACTACGGATCAGAAGATTCCAGGTTCGACTCCTGGCTGGCTCGGTGGGGTTCCTCG	ACGCGTCTGACTACGGATCAGAAGATTCCAGGATCGACTCCTGGCTGGCTCGGTGGGGTTCCTCG
pseudouridine	chr14:22929755(+)	DM-Ψ-seq (High)	Human	AL132780.1	rs1030243260	chr14:22929755..22929755	dbSNP153	RBP 18		CGCGTCTGACTACGGATCAGAAGATTCCAGGTTCGACTCCTGGCTGGCTCGGTGGGGTTCCTCGC	CGCGTCTGACTACGGATCAGAAGATTCCAGGTGCGACTCCTGGCTGGCTCGGTGGGGTTCCTCGC
pseudouridine	chr14:23970531(-)	CeU-seq (High)	Human	DHRS4-AS1	rs1003898780	chr14:23970530..23970532	dbSNP153			CGCTGCCTTTTGTTCAGATATGCCCTGGCCCCTGAGGTGGAATCTGGAGAGGCAGTAGGCCTTGC	CGCTGCCTTTTGTTCAGATATGCCCTGGCCC__GAGGTGGAATCTGGAGAGGCAGTAGGCCTTGC
pseudouridine	chr15:45198658(-)	DM-Ψ-seq (High)	Human	SHF,AC051619.6	rs536809854	chr15:45198658..45198658	dbSNP153	RBP 20		TCCCCGGTAGCTCGCCGTGATCGTATAGTGGTTAGTACTCTGCGTTGTGGCCGCAGCAACCTCGG	TCCCCGGTAGCTCGCCGTGATCGTATAGTGGTGAGTACTCTGCGTTGTGGCCGCAGCAACCTCGG
pseudouridine	chr15:45200466(-)	DM-Ψ-seq (High)	Human	SHF,AC051619.7	rs940326243	chr15:45200466..45200466	dbSNP153	RBP 24		GTCCCTAGTAGCTCGCCGTGATCGTATAGTGGTTAGTACTCTGCGTTGTGGCCGCAGCAACCTCG	GTCCCTAGTAGCTCGCCGTGATCGTATAGTGGCTAGTACTCTGCGTTGTGGCCGCAGCAACCTCG
pseudouridine	chr15:45201163(+)	DM-Ψ-seq (High)	Human	tRNA-His-GTG-1-1,piR-44984,tRNA-His-GTG-2-1,lnc-DUOX1-2	rs1182475474	chr15:45201161..45201161	dbSNP153	RBP 12		TCGTGGCGTCCCGGTAGCTCGCCGTGATCGTATAGTGGTTAGTACTCTGCGTTGTGGCCGCAGCA	TCGTGGCGTCCCGGTAGCTCGCCGTGATCGCATAGTGGTTAGTACTCTGCGTTGTGGCCGCAGCA
pseudouridine	chr15:45201163(+)	DM-Ψ-seq (High)	Human	tRNA-His-GTG-1-1,piR-44984,tRNA-His-GTG-2-1,lnc-DUOX1-2	rs532031225	chr15:45201163..45201163	dbSNP153	RBP 12		TCGTGGCGTCCCGGTAGCTCGCCGTGATCGTATAGTGGTTAGTACTCTGCGTTGTGGCCGCAGCA	TCGTGGCGTCCCGGTAGCTCGCCGTGATCGTACAGTGGTTAGTACTCTGCGTTGTGGCCGCAGCA
pseudouridine	chr15:45201163(+)	DM-Ψ-seq (High)	Human	tRNA-His-GTG-1-1,piR-44984,tRNA-His-GTG-2-1,lnc-DUOX1-2	rs532031225	chr15:45201163..45201163	dbSNP153	RBP 12		TCGTGGCGTCCCGGTAGCTCGCCGTGATCGTATAGTGGTTAGTACTCTGCGTTGTGGCCGCAGCA	TCGTGGCGTCCCGGTAGCTCGCCGTGATCGTAGAGTGGTTAGTACTCTGCGTTGTGGCCGCAGCA
pseudouridine	chr15:45201163(+)	DM-Ψ-seq (High)	Human	tRNA-His-GTG-1-1,piR-44984,tRNA-His-GTG-2-1,lnc-DUOX1-2	rs1014978711	chr15:45201164..45201164	dbSNP153	RBP 12		TCGTGGCGTCCCGGTAGCTCGCCGTGATCGTATAGTGGTTAGTACTCTGCGTTGTGGCCGCAGCA	TCGTGGCGTCCCGGTAGCTCGCCGTGATCGTATGGTGGTTAGTACTCTGCGTTGTGGCCGCAGCA
pseudouridine	chr15:45201178(+)	DM-Ψ-seq (High)	Human	tRNA-His-GTG-1-1,piR-44984,tRNA-His-GTG-2-1,lnc-DUOX1-2	rs1373799801	chr15:45201178..45201178	dbSNP153	RBP 9		AGCTCGCCGTGATCGTATAGTGGTTAGTACTCTGCGTTGTGGCCGCAGCAACCTCGGTTCGAATC	AGCTCGCCGTGATCGTATAGTGGTTAGTACTCCGCGTTGTGGCCGCAGCAACCTCGGTTCGAATC
pseudouridine	chr15:45201203(+)	DM-Ψ-seq (High)	Human	tRNA-His-GTG-1-1,tRNA-His-GTG-2-1,lnc-DUOX1-2	rs555263499	chr15:45201203..45201203	dbSNP153	RBP 10		AGTACTCTGCGTTGTGGCCGCAGCAACCTCGGTTCGAATCCGAGTCACGGCATTGTGGAAACAAT	AGTACTCTGCGTTGTGGCCGCAGCAACCTCGGCTCGAATCCGAGTCACGGCATTGTGGAAACAAT
pseudouridine	chr15:45201204(+)	DM-Ψ-seq (High)	Human	tRNA-His-GTG-1-1,tRNA-His-GTG-2-1,lnc-DUOX1-2	rs943770565	chr15:45201204..45201204	dbSNP153	RBP 10		GTACTCTGCGTTGTGGCCGCAGCAACCTCGGTTCGAATCCGAGTCACGGCATTGTGGAAACAATG	GTACTCTGCGTTGTGGCCGCAGCAACCTCGGTCCGAATCCGAGTCACGGCATTGTGGAAACAATG
pseudouridine	chr15:72344046(+)	Ψ-seq (High)	Human	AC009690.2	rs1171320931	chr15:72344046..72344046	dbSNP153			GCAGTGGAAGCCTGGCTCCACTACCATTCACCTACAGCCAGCACCCTCCTCGGTGCCTGGGGCTC	GCAGTGGAAGCCTGGCTCCACTACCATTCACCCACAGCCAGCACCCTCCTCGGTGCCTGGGGCTC
pseudouridine	chr15:89335111(+)	DM-Ψ-seq (High)	Human	AC124068.2	rs1186956056	chr15:89335111..89335111	dbSNP153	RBP 25		GTGGCCTAATGGATAAGGCGTCTGACTTCGGATCAGAAGATTGCAGGTTCGAGTCCTGCCGCGGT	GTGGCCTAATGGATAAGGCGTCTGACTTCGGAACAGAAGATTGCAGGTTCGAGTCCTGCCGCGGT
pseudouridine	chr15:89335111(+)	DM-Ψ-seq (High)	Human	AC124068.2	rs1186956056	chr15:89335111..89335111	dbSNP153	RBP 25		GTGGCCTAATGGATAAGGCGTCTGACTTCGGATCAGAAGATTGCAGGTTCGAGTCCTGCCGCGGT	GTGGCCTAATGGATAAGGCGTCTGACTTCGGAGCAGAAGATTGCAGGTTCGAGTCCTGCCGCGGT
pseudouridine	chr15:89335126(+)	DM-Ψ-seq (High)	Human	AC124068.2	rs768207675	chr15:89335126..89335126	dbSNP153	RBP 25 miRNA 1		AGGCGTCTGACTTCGGATCAGAAGATTGCAGGTTCGAGTCCTGCCGCGGTCGAAGGGAGGTTATG	AGGCGTCTGACTTCGGATCAGAAGATTGCAGGCTCGAGTCCTGCCGCGGTCGAAGGGAGGTTATG
pseudouridine	chr16:3152926(+)	DM-Ψ-seq (High)	Human	TRR-CCT3-1,tRNA-Arg-CCT-3-1,lnc-ZNF213-3	rs921066518	chr16:3152926..3152926	dbSNP153	RBP 24		TTATCCGCCCCGGTGGCCTAATGGATAAGGCATTGGCCTCCTAAGCCAGGGATTGTGGGTTCGAG	TTATCCGCCCCGGTGGCCTAATGGATAAGGCACTGGCCTCCTAAGCCAGGGATTGTGGGTTCGAG
pseudouridine	chr16:3152926(+)	DM-Ψ-seq (High)	Human	TRR-CCT3-1,tRNA-Arg-CCT-3-1,lnc-ZNF213-3	rs921066518	chr16:3152926..3152926	dbSNP153	RBP 24		TTATCCGCCCCGGTGGCCTAATGGATAAGGCATTGGCCTCCTAAGCCAGGGATTGTGGGTTCGAG	TTATCCGCCCCGGTGGCCTAATGGATAAGGCAGTGGCCTCCTAAGCCAGGGATTGTGGGTTCGAG
pseudouridine	chr16:3152927(+)	DM-Ψ-seq (High)	Human	TRR-CCT3-1,tRNA-Arg-CCT-3-1,lnc-ZNF213-3	rs1180424306	chr16:3152927..3152927	dbSNP153	RBP 24		TATCCGCCCCGGTGGCCTAATGGATAAGGCATTGGCCTCCTAAGCCAGGGATTGTGGGTTCGAGT	TATCCGCCCCGGTGGCCTAATGGATAAGGCATGGGCCTCCTAAGCCAGGGATTGTGGGTTCGAGT
pseudouridine	chr16:3157431(-)	DM-Ψ-seq (High)	Human	AC108134.2	rs1362991097	chr16:3157431..3157431	dbSNP153	RBP 24 miRNA 3		GTCGGTAGAGCATGAGACCCTTAATCTCAGGGTCGTGGGTTCGAGCCCCACGTTGGGCGTGAGAT	GTCGGTAGAGCATGAGACCCTTAATCTCAGGGCCGTGGGTTCGAGCCCCACGTTGGGCGTGAGAT
pseudouridine	chr16:3157443(-)	DM-Ψ-seq (High)	Human	AC108134.2	rs1231125134	chr16:3157441..3157443	dbSNP153	RBP 25 miRNA 3		CCGGCTAGCTCAGTCGGTAGAGCATGAGACCCTTAATCTCAGGGTCGTGGGTTCGAGCCCCACGT	CCGGCTAGCTCAGTCGGTAGAGCATGAGACCC__AATCTCAGGGTCGTGGGTTCGAGCCCCACGT
pseudouridine	chr16:3189646(+)	DM-Ψ-seq (High)	Human	AJ003147.2	rs895382739	chr16:3189644..3189644	dbSNP153	RBP 3		CCTTAATGCGTAAATCGTGTGGCTCGTTGGTCTAGGGGTATGATTCTCGCTTAGGGTGCGAGAGG	CCTTAATGCGTAAATCGTGTGGCTCGTTGGCCTAGGGGTATGATTCTCGCTTAGGGTGCGAGAGG
pseudouridine	chr16:3189646(+)	DM-Ψ-seq (High)	Human	AJ003147.2	rs1356475661	chr16:3189646..3189646	dbSNP153	RBP 3		CCTTAATGCGTAAATCGTGTGGCTCGTTGGTCTAGGGGTATGATTCTCGCTTAGGGTGCGAGAGG	CCTTAATGCGTAAATCGTGTGGCTCGTTGGTCCAGGGGTATGATTCTCGCTTAGGGTGCGAGAGG
pseudouridine	chr16:3189646(+)	DM-Ψ-seq (High)	Human	AJ003147.2	rs1356475661	chr16:3189646..3189646	dbSNP153	RBP 3		CCTTAATGCGTAAATCGTGTGGCTCGTTGGTCTAGGGGTATGATTCTCGCTTAGGGTGCGAGAGG	CCTTAATGCGTAAATCGTGTGGCTCGTTGGTCGAGGGGTATGATTCTCGCTTAGGGTGCGAGAGG
pseudouridine	chr16:3189646(+)	DM-Ψ-seq (High)	Human	AJ003147.2	rs1028453266	chr16:3189647..3189647	dbSNP153	RBP 3		CCTTAATGCGTAAATCGTGTGGCTCGTTGGTCTAGGGGTATGATTCTCGCTTAGGGTGCGAGAGG	CCTTAATGCGTAAATCGTGTGGCTCGTTGGTCTGGGGGTATGATTCTCGCTTAGGGTGCGAGAGG
pseudouridine	chr16:3189686(+)	DM-Ψ-seq (High)	Human	AJ003147.2	rs749717814	chr16:3189686..3189686	dbSNP153	RBP 15		TGATTCTCGCTTAGGGTGCGAGAGGTCCCGGGTTCAAATCCCGGACGAGCCCGGCTTTTGGTGCA	TGATTCTCGCTTAGGGTGCGAGAGGTCCCGGGATCAAATCCCGGACGAGCCCGGCTTTTGGTGCA
pseudouridine	chr16:3189686(+)	DM-Ψ-seq (High)	Human	AJ003147.2	rs749717814	chr16:3189686..3189686	dbSNP153	RBP 15		TGATTCTCGCTTAGGGTGCGAGAGGTCCCGGGTTCAAATCCCGGACGAGCCCGGCTTTTGGTGCA	TGATTCTCGCTTAGGGTGCGAGAGGTCCCGGGCTCAAATCCCGGACGAGCCCGGCTTTTGGTGCA
pseudouridine	chr16:3191527(+)	DM-Ψ-seq (High)	Human	AJ003147.2	rs139156010	chr16:3191527..3191527	dbSNP153	RBP 24		AGGGAAGCCCGGCTAGCTCAGTCGGTAGAGCATGGGACTCTTAATCTCAGGGTCGTGGGTTCGAG	AGGGAAGCCCGGCTAGCTCAGTCGGTAGAGCAGGGGACTCTTAATCTCAGGGTCGTGGGTTCGAG
pseudouridine	chr16:3192001(+)	DM-Ψ-seq (High)	Human	AJ003147.2	rs2238394	chr16:3191999..3191999	dbSNP153	RBP 13		AGTAAAGGGCCTGCTGCTGTGGCTCGTTGGTCTAGGGGTATGATTCTCGCTTAGGATGCGAGAGG	AGTAAAGGGCCTGCTGCTGTGGCTCGTTGGCCTAGGGGTATGATTCTCGCTTAGGATGCGAGAGG
pseudouridine	chr16:3192001(+)	DM-Ψ-seq (High)	Human	AJ003147.2	rs2238394	chr16:3191999..3191999	dbSNP153	RBP 13		AGTAAAGGGCCTGCTGCTGTGGCTCGTTGGTCTAGGGGTATGATTCTCGCTTAGGATGCGAGAGG	AGTAAAGGGCCTGCTGCTGTGGCTCGTTGGGCTAGGGGTATGATTCTCGCTTAGGATGCGAGAGG
pseudouridine	chr16:3192001(+)	DM-Ψ-seq (High)	Human	AJ003147.2	rs569222812	chr16:3192001..3192001	dbSNP153	RBP 13		AGTAAAGGGCCTGCTGCTGTGGCTCGTTGGTCTAGGGGTATGATTCTCGCTTAGGATGCGAGAGG	AGTAAAGGGCCTGCTGCTGTGGCTCGTTGGTCAAGGGGTATGATTCTCGCTTAGGATGCGAGAGG
pseudouridine	chr16:3192001(+)	DM-Ψ-seq (High)	Human	AJ003147.2	rs569222812	chr16:3192001..3192001	dbSNP153	RBP 13		AGTAAAGGGCCTGCTGCTGTGGCTCGTTGGTCTAGGGGTATGATTCTCGCTTAGGATGCGAGAGG	AGTAAAGGGCCTGCTGCTGTGGCTCGTTGGTCCAGGGGTATGATTCTCGCTTAGGATGCGAGAGG
pseudouridine	chr16:3192001(+)	DM-Ψ-seq (High)	Human	AJ003147.2	rs569222812	chr16:3192001..3192001	dbSNP153	RBP 13		AGTAAAGGGCCTGCTGCTGTGGCTCGTTGGTCTAGGGGTATGATTCTCGCTTAGGATGCGAGAGG	AGTAAAGGGCCTGCTGCTGTGGCTCGTTGGTCGAGGGGTATGATTCTCGCTTAGGATGCGAGAGG
pseudouridine	chr16:3192001(+)	DM-Ψ-seq (High)	Human	AJ003147.2	rs111246815	chr16:3192002..3192002	dbSNP153	RBP 13		AGTAAAGGGCCTGCTGCTGTGGCTCGTTGGTCTAGGGGTATGATTCTCGCTTAGGATGCGAGAGG	AGTAAAGGGCCTGCTGCTGTGGCTCGTTGGTCTCGGGGTATGATTCTCGCTTAGGATGCGAGAGG
pseudouridine	chr16:3192001(+)	DM-Ψ-seq (High)	Human	AJ003147.2	rs111246815	chr16:3192002..3192002	dbSNP153	RBP 13		AGTAAAGGGCCTGCTGCTGTGGCTCGTTGGTCTAGGGGTATGATTCTCGCTTAGGATGCGAGAGG	AGTAAAGGGCCTGCTGCTGTGGCTCGTTGGTCTGGGGGTATGATTCTCGCTTAGGATGCGAGAGG
pseudouridine	chr16:3192001(+)	DM-Ψ-seq (High)	Human	AJ003147.2	rs1039773280	chr16:3192003..3192003	dbSNP153	RBP 13		AGTAAAGGGCCTGCTGCTGTGGCTCGTTGGTCTAGGGGTATGATTCTCGCTTAGGATGCGAGAGG	AGTAAAGGGCCTGCTGCTGTGGCTCGTTGGTCTACGGGTATGATTCTCGCTTAGGATGCGAGAGG
pseudouridine	chr16:3192025(+)	DM-Ψ-seq (High)	Human	AJ003147.2	rs1368880585	chr16:3192025..3192025	dbSNP153	RBP 23		CGTTGGTCTAGGGGTATGATTCTCGCTTAGGATGCGAGAGGTCCCGGGTTCAAATCCCGGACGAG	CGTTGGTCTAGGGGTATGATTCTCGCTTAGGAGGCGAGAGGTCCCGGGTTCAAATCCCGGACGAG
pseudouridine	chr16:3192041(+)	DM-Ψ-seq (High)	Human	AJ003147.2	rs1198402837	chr16:3192041..3192041	dbSNP153	RBP 19		TGATTCTCGCTTAGGATGCGAGAGGTCCCGGGTTCAAATCCCGGACGAGCCCCTCTTCTTATTTT	TGATTCTCGCTTAGGATGCGAGAGGTCCCGGGATCAAATCCCGGACGAGCCCCTCTTCTTATTTT
pseudouridine	chr16:3192041(+)	DM-Ψ-seq (High)	Human	AJ003147.2	rs1198402837	chr16:3192041..3192041	dbSNP153	RBP 19		TGATTCTCGCTTAGGATGCGAGAGGTCCCGGGTTCAAATCCCGGACGAGCCCCTCTTCTTATTTT	TGATTCTCGCTTAGGATGCGAGAGGTCCCGGGGTCAAATCCCGGACGAGCCCCTCTTCTTATTTT
pseudouridine	chr16:3193971(+)	DM-Ψ-seq (High)	Human	AJ003147.2	rs1251128228	chr16:3193971..3193971	dbSNP153	RBP 14		AGGTACTGGCCTCCTAAGCCAGGGATTGTGGGTTCGAGTTCCACCTGGGGTAAGACAACACCGAC	AGGTACTGGCCTCCTAAGCCAGGGATTGTGGGGTCGAGTTCCACCTGGGGTAAGACAACACCGAC
pseudouridine	chr16:89712087(+)	CeU-seq (High)	Human	VPS9D1-AS1	rs559390809	chr16:89712087..89712087	dbSNP153	RBP 5		GGCCTCCTGGAGCCGCAGCCGGCGCTCCTCCATCTTTCTCTGGAGCTGGGTGCAGAGTCAAGGGG	GGCCTCCTGGAGCCGCAGCCGGCGCTCCTCCAACTTTCTCTGGAGCTGGGTGCAGAGTCAAGGGG
pseudouridine	chr17:8220922(-)	DM-Ψ-seq (High)	Human	LINC00324	rs1442728801	chr17:8220922..8220922	dbSNP153	miRNA 1 RBP 16		CACGCTGTTGGACAGGCCTCGTGGCGCAACGGTAGCGCGTCTGACTCCAGATCAGAAGGTTGCGT	CACGCTGTTGGACAGGCCTCGTGGCGCAACGGAAGCGCGTCTGACTCCAGATCAGAAGGTTGCGT
pseudouridine	chr17:8222291(-)	DM-Ψ-seq (High)	Human	LINC00324	rs539660985	chr17:8222291..8222291	dbSNP153	RBP 24		TCTCTACAGGTCCCTCCTCGTTAGTATAGTGGTGAGTATCCCCGCCTGTCACGCGGGAGACCGGG	TCTCTACAGGTCCCTCCTCGTTAGTATAGTGGGGAGTATCCCCGCCTGTCACGCGGGAGACCGGG
pseudouridine	chr17:8222291(-)	DM-Ψ-seq (High)	Human	LINC00324	rs539660985	chr17:8222291..8222291	dbSNP153	RBP 24		TCTCTACAGGTCCCTCCTCGTTAGTATAGTGGTGAGTATCCCCGCCTGTCACGCGGGAGACCGGG	TCTCTACAGGTCCCTCCTCGTTAGTATAGTGGCGAGTATCCCCGCCTGTCACGCGGGAGACCGGG
pseudouridine	chr17:8222291(-)	DM-Ψ-seq (High)	Human	LINC00324	rs539660985	chr17:8222291..8222291	dbSNP153	RBP 24		TCTCTACAGGTCCCTCCTCGTTAGTATAGTGGTGAGTATCCCCGCCTGTCACGCGGGAGACCGGG	TCTCTACAGGTCCCTCCTCGTTAGTATAGTGGAGAGTATCCCCGCCTGTCACGCGGGAGACCGGG
pseudouridine	chr17:8222886(-)	DM-Ψ-seq (High)	Human	LINC00324	rs922256008	chr17:8222886..8222886	dbSNP153	RBP 13 miRNA 2		AACGTCCGCACGTCGGCTCGTTGGTCTAGGGGTATGATTCTCGCTTCGGGTGCGAGAGGTCCCGG	AACGTCCGCACGTCGGCTCGTTGGTCTAGGGGAATGATTCTCGCTTCGGGTGCGAGAGGTCCCGG
pseudouridine	chr17:16536989(+)	pseudo-seq (High)	Human	lnc-TRPV2-4,lnc-TRPV2-4:2,lnc-TRPV2-4:3,lnc-TRPV2-4:4,lnc-TRPV2-4:5,lnc-TRPV2-4:6,lnc-TRPV2-4:7	rs948970138	chr17:16536989..16536989	dbSNP153		Detail	AACTCCTCCCGCAGGCTCTACGTTCGAATGCCTCCACCCTGATTTTAGAAGGTTATAGGCGCACA	AACTCCTCCCGCAGGCTCTACGTTCGAATGCCCCCACCCTGATTTTAGAAGGTTATAGGCGCACA
pseudouridine	chr17:29394166(+)	CeU-seq (High)	Human	AC068025.2,TAOK1	rs910271522	chr17:29394166..29394166	dbSNP153	circRNA 5		TTTTAATAATTTGCCAGTTTTTTTTTTTTTTTTTTTTTTTTTTTTTTTTTGAGACGGAGTCTTGC	TTTTAATAATTTGCCAGTTTTTTTTTTTTTTTGTTTTTTTTTTTTTTTTTGAGACGGAGTCTTGC
pseudouridine	chr17:68206790(+)	CeU-seq (High)	Human	AC005332.4	rs1468674121	chr17:68206790..68206790	dbSNP153	RBP 1		TTTTCACATCCCTAGCTGTGGTTTTAAAATTGTGTTAAGGAAATGGATCATTTGGGTTAGTAGGG	TTTTCACATCCCTAGCTGTGGTTTTAAAATTGCGTTAAGGAAATGGATCATTTGGGTTAGTAGGG
pseudouridine	chr17:80881380(-)	pseudo-seq (High)	Human	lnc-TMEM105-1	rs1441416306	chr17:80881380..80881380	dbSNP153		Detail	ACTTCTTCATGTGGGATTTGCTTTCTTCCTTATTCTTAAGAATGGGAAGTGATGGTTTCCAAAAC	ACTTCTTCATGTGGGATTTGCTTTCTTCCTTAGTCTTAAGAATGGGAAGTGATGGTTTCCAAAAC
pseudouridine	chr19:39412222(-)	DM-Ψ-seq (High)	Human	tRNA-Ile-TAT-1-1,TRI-TAT1-1,lnc-RPS16-3	rs1318735970	chr19:39412222..39412222	dbSNP153	RBP 22		GTGGCGCAATCGGTTAGCGCGCGGTACTTATATGACAGTGCGAGCGGAGCAATGCCGAGGTTGTG	GTGGCGCAATCGGTTAGCGCGCGGTACTTATAGGACAGTGCGAGCGGAGCAATGCCGAGGTTGTG
pseudouridine	chr19:51922166(-)	DM-Ψ-seq (High)	Human	lnc-ZNF649-2,TRK-CTT11-1-001,TRK-CTT11-1-001:2,tRNA-Lys-CTT-11-1	rs1166627137	chr19:51922166..51922166	dbSNP153	RBP 15		GGTAGAGCATGAGACTCTTAATCTCAGGGTCATGGGTTCGTGCCCCATGTTGGGTGCCAGATGAA	GGTAGAGCATGAGACTCTTAATCTCAGGGTCAGGGGTTCGTGCCCCATGTTGGGTGCCAGATGAA
pseudouridine	chr1:6222864(+)	Ψ-seq (High)	Human	NONHSAG000233.2	rs1258175723	chr1:6222863..6222863	dbSNP153		Detail	CCTCAAAGAGCCGGGGCAGGATGCCAGAATC_TAACTACATCCTCTCCCGGTTTGCAGTTCTAGG	CCTCAAAGAGCCGGGGCAGGATGCCAGAATCTTAACTACATCCTCTCCCGGTTTGCAGTTCTAGG
pseudouridine	chr1:145459670(+)	DM-Ψ-seq (High)	Human	HSALNG0006752-001,tRNA-Gln-CTG-3-1	rs1329500654	chr1:145459667..145459668	dbSNP153	RBP 1 miRNA 9		CCGGCAAACTTGCACGATGAGGTTCCATGGTGTAATGGTGAGCACTCTGGACTCTGAATCCAGCG	CCGGCAAACTTGCACGATGAGGTTCCATGG_GTAATGGTGAGCACTCTGGACTCTGAATCCAGCG
pseudouridine	chr1:145459670(+)	DM-Ψ-seq (High)	Human	HSALNG0006752-001,tRNA-Gln-CTG-3-1	rs1463896735	chr1:145459672..145459672	dbSNP153	RBP 1 miRNA 9		CCGGCAAACTTGCACGATGAGGTTCCATGGTGTAATGGTGAGCACTCTGGACTCTGAATCCAGCG	CCGGCAAACTTGCACGATGAGGTTCCATGGTGTATTGGTGAGCACTCTGGACTCTGAATCCAGCG
pseudouridine	chr1:148281417(+)	DM-Ψ-seq (High)	Human	tRNA-His-GTG-1-1,lnc-GPR89B-11,lnc-GPR89B-11:2,tRNA-His-GTG-2-1	rs1380247536	chr1:148281417..148281417	dbSNP153		Detail	AGTACTCTGCGTTGTGGCCGCAGCAACCTCGGTTCGAATCCGAGTCACGGCAATGTCGTTAGTCT	AGTACTCTGCGTTGTGGCCGCAGCAACCTCGGCTCGAATCCGAGTCACGGCAATGTCGTTAGTCT
pseudouridine	chr1:148302761(+)	DM-Ψ-seq (High)	Human	AC245100.1	rs1251123328	chr1:148302761..148302761	dbSNP153		Detail	GACATTGCCGTGACTCGGATTCGAACCGAGGTTGCTGCGGCCACAACGCAGAGTACTAACCACTA	GACATTGCCGTGACTCGGATTCGAACCGAGGTCGCTGCGGCCACAACGCAGAGTACTAACCACTA
pseudouridine	chr1:148302786(-)	DM-Ψ-seq (High)	Human	LINC01138	rs1476266215	chr1:148302786..148302786	dbSNP153	RBP 11		TAGCCTGTGGCTCGCCGTGATCGTATAGTGGTTAGTACTCTGCGTTGTGGCCGCAGCAACCTCGG	TAGCCTGTGGCTCGCCGTGATCGTATAGTGGTAAGTACTCTGCGTTGTGGCCGCAGCAACCTCGG
pseudouridine	chr1:148308929(-)	DM-Ψ-seq (High)	Human	LINC01138	rs1458513023	chr1:148308929..148308929	dbSNP153	RBP 1		TTTCACCCGTGCGGCCCGGGTTCAATTCCCGATGAAGGAATACATTTTGTAACATCCCCAAATTG	TTTCACCCGTGCGGCCCGGGTTCAATTCCCGACGAAGGAATACATTTTGTAACATCCCCAAATTG
pseudouridine	chr1:148308929(-)	DM-Ψ-seq (High)	Human	LINC01138	rs1458513023	chr1:148308929..148308929	dbSNP153	RBP 1		TTTCACCCGTGCGGCCCGGGTTCAATTCCCGATGAAGGAATACATTTTGTAACATCCCCAAATTG	TTTCACCCGTGCGGCCCGGGTTCAATTCCCGAAGAAGGAATACATTTTGTAACATCCCCAAATTG
pseudouridine	chr1:161422100(-)	DM-Ψ-seq (High)	Human	AL592295.3	rs900500297	chr1:161422100..161422100	dbSNP153	RBP 15		TTTCACCGCCGCGGCCCGGGTTCGATTCCCGGTCAGGGAAGTTTGCTTTTTTCCTTTCTGATATC	TTTCACCGCCGCGGCCCGGGTTCGATTCCCGGGCAGGGAAGTTTGCTTTTTTCCTTTCTGATATC
pseudouridine	chr1:161422100(-)	DM-Ψ-seq (High)	Human	AL592295.3	rs900500297	chr1:161422100..161422100	dbSNP153	RBP 15		TTTCACCGCCGCGGCCCGGGTTCGATTCCCGGTCAGGGAAGTTTGCTTTTTTCCTTTCTGATATC	TTTCACCGCCGCGGCCCGGGTTCGATTCCCGGCCAGGGAAGTTTGCTTTTTTCCTTTCTGATATC
pseudouridine	chr1:161523898(+)	DM-Ψ-seq (High)	Human	AL590385.2,FCGR2A	rs1327456961	chr1:161523898..161523898	dbSNP153	RBP 1 circRNA 2		ACCCGGGCCTCCCGCGTGGCAGGCGAGAATTCTACCACTGAACCACCAATGCTACTGTCAGCTAA	ACCCGGGCCTCCCGCGTGGCAGGCGAGAATTCCACCACTGAACCACCAATGCTACTGTCAGCTAA
pseudouridine	chr1:161523899(-)	DM-Ψ-seq (High)	Human	piR-31924,piR-61648,piR-31925,MF281432-001,tRNA-Gly-GCC-2-1,piR-61646,TRG2,piR-31068,piR-57498,piR-61645,piR-30456,piR-61644,piR-35221,piR-61647,piR-32679,lnc-FCGR3A-2	rs560531224	chr1:161523899..161523899	dbSNP153	RBP 24		TTTAGCTGACAGTAGCATTGGTGGTTCAGTGGTAGAATTCTCGCCTGCCACGCGGGAGGCCCGGG	TTTAGCTGACAGTAGCATTGGTGGTTCAGTGGGAGAATTCTCGCCTGCCACGCGGGAGGCCCGGG
pseudouridine	chr1:161523899(-)	DM-Ψ-seq (High)	Human	piR-31924,piR-61648,piR-31925,MF281432-001,tRNA-Gly-GCC-2-1,piR-61646,TRG2,piR-31068,piR-57498,piR-61645,piR-30456,piR-61644,piR-35221,piR-61647,piR-32679,lnc-FCGR3A-2	rs560531224	chr1:161523899..161523899	dbSNP153	RBP 24		TTTAGCTGACAGTAGCATTGGTGGTTCAGTGGTAGAATTCTCGCCTGCCACGCGGGAGGCCCGGG	TTTAGCTGACAGTAGCATTGGTGGTTCAGTGGCAGAATTCTCGCCTGCCACGCGGGAGGCCCGGG
pseudouridine	chr1:161523899(-)	DM-Ψ-seq (High)	Human	piR-31924,piR-61648,piR-31925,MF281432-001,tRNA-Gly-GCC-2-1,piR-61646,TRG2,piR-31068,piR-57498,piR-61645,piR-30456,piR-61644,piR-35221,piR-61647,piR-32679,lnc-FCGR3A-2	rs560531224	chr1:161523899..161523899	dbSNP153	RBP 24		TTTAGCTGACAGTAGCATTGGTGGTTCAGTGGTAGAATTCTCGCCTGCCACGCGGGAGGCCCGGG	TTTAGCTGACAGTAGCATTGGTGGTTCAGTGGAAGAATTCTCGCCTGCCACGCGGGAGGCCCGGG
pseudouridine	chr1:161530380(-)	DM-Ψ-seq (High)	Human	lnc-FCGR3A-4,tRNA-Leu-CAG-1-1,lnc-FCGR3A-2	rs190917738	chr1:161530380..161530380	dbSNP153	RBP 8		GAGCGGTCTAAGGCGCTGCGTTCAGGTCGCAGTCTCCCCTGGAGGCGTGGGTTCGAATCCCACTC	GAGCGGTCTAAGGCGCTGCGTTCAGGTCGCAGGCTCCCCTGGAGGCGTGGGTTCGAATCCCACTC
pseudouridine	chr1:161530380(-)	DM-Ψ-seq (High)	Human	lnc-FCGR3A-4,tRNA-Leu-CAG-1-1,lnc-FCGR3A-2	rs190917738	chr1:161530380..161530380	dbSNP153	RBP 8		GAGCGGTCTAAGGCGCTGCGTTCAGGTCGCAGTCTCCCCTGGAGGCGTGGGTTCGAATCCCACTC	GAGCGGTCTAAGGCGCTGCGTTCAGGTCGCAGCCTCCCCTGGAGGCGTGGGTTCGAATCCCACTC
pseudouridine	chr1:161530406(-)	DM-Ψ-seq (High)	Human	lnc-FCGR3A-4,tRNA-Leu-CAG-1-1,lnc-FCGR3A-2	rs1027828524	chr1:161530406..161530406	dbSNP153	RBP 17		ATGGTAAAACATGTGTCAGGATGGCCGAGCGGTCTAAGGCGCTGCGTTCAGGTCGCAGTCTCCCC	ATGGTAAAACATGTGTCAGGATGGCCGAGCGGCCTAAGGCGCTGCGTTCAGGTCGCAGTCTCCCC
pseudouridine	chr1:161531120(+)	DM-Ψ-seq (High)	Human	AL590385.2	rs1000487784	chr1:161531120..161531120	dbSNP153	RBP 24, miRNA 1, circRNA 2	Detail	ATATCTAAAACTCCAAACCGGGTACGCGTTGGTGGTATAGTGGTGAGCATAGCTGCCTTCCAAGC	ATATCTAAAACTCCAAACCGGGTACGCGTTGGCGGTATAGTGGTGAGCATAGCTGCCTTCCAAGC
pseudouridine	chr1:161531125(+)	DM-Ψ-seq (High)	Human	AL590385.2	rs1461364209	chr1:161531123..161531123	dbSNP153	RBP 24, miRNA 1, circRNA 2	Detail	TAAAACTCCAAACCGGGTACGCGTTGGTGGTATAGTGGTGAGCATAGCTGCCTTCCAAGCAGTTG	TAAAACTCCAAACCGGGTACGCGTTGGTGGAATAGTGGTGAGCATAGCTGCCTTCCAAGCAGTTG
pseudouridine	chr1:161531125(+)	DM-Ψ-seq (High)	Human	AL590385.2	rs1461364209	chr1:161531123..161531123	dbSNP153	RBP 24, miRNA 1, circRNA 2	Detail	TAAAACTCCAAACCGGGTACGCGTTGGTGGTATAGTGGTGAGCATAGCTGCCTTCCAAGCAGTTG	TAAAACTCCAAACCGGGTACGCGTTGGTGGGATAGTGGTGAGCATAGCTGCCTTCCAAGCAGTTG
pseudouridine	chr1:161531125(+)	DM-Ψ-seq (High)	Human	AL590385.2	rs1425068639	chr1:161531125..161531125	dbSNP153	RBP 24, miRNA 1, circRNA 2	Detail	TAAAACTCCAAACCGGGTACGCGTTGGTGGTATAGTGGTGAGCATAGCTGCCTTCCAAGCAGTTG	TAAAACTCCAAACCGGGTACGCGTTGGTGGTACAGTGGTGAGCATAGCTGCCTTCCAAGCAGTTG
pseudouridine	chr1:161531125(+)	DM-Ψ-seq (High)	Human	AL590385.2	rs1414004538	chr1:161531126..161531126	dbSNP153	RBP 24, miRNA 1, circRNA 2	Detail	TAAAACTCCAAACCGGGTACGCGTTGGTGGTATAGTGGTGAGCATAGCTGCCTTCCAAGCAGTTG	TAAAACTCCAAACCGGGTACGCGTTGGTGGTATGGTGGTGAGCATAGCTGCCTTCCAAGCAGTTG
pseudouridine	chr1:161531126(-)	Ψ-seq (High)	Human	lnc-FCGR3A-2	rs1414004538	chr1:161531126..161531126	dbSNP153		Detail	TCAACTGCTTGGAAGGCAGCTATGCTCACCACTATACCACCAACGCGTACCCGGTTTGGAGTTTT	TCAACTGCTTGGAAGGCAGCTATGCTCACCACCATACCACCAACGCGTACCCGGTTTGGAGTTTT
pseudouridine	chr1:161531166(+)	DM-Ψ-seq (High)	Human	AL590385.2	rs949807361	chr1:161531166..161531166	dbSNP153	RBP 14, circRNA 2		GCATAGCTGCCTTCCAAGCAGTTGACCCGGGTTCGATTCCCGGCCAACGCAAGGGTTTTTGTCTT	GCATAGCTGCCTTCCAAGCAGTTGACCCGGGTGCGATTCCCGGCCAACGCAAGGGTTTTTGTCTT
pseudouridine	chr1:161540268(+)	DM-Ψ-seq (High)	Human	AL590385.2	rs1167594057	chr1:161540268..161540268	dbSNP153	RBP 24, miRNA 1, circRNA 2	Detail	CGCCCGTCTCTGTGGCGCAATCGGTTAGCGCGTTCGGCTGTTAACCGAAAGGTTGGTGGTTCGAT	CGCCCGTCTCTGTGGCGCAATCGGTTAGCGCGGTCGGCTGTTAACCGAAAGGTTGGTGGTTCGAT
pseudouridine	chr1:161540296(+)	DM-Ψ-seq (High)	Human	AL590385.2	rs1233620085	chr1:161540296..161540296	dbSNP153	RBP 24, circRNA 2		CGCGTTCGGCTGTTAACCGAAAGGTTGGTGGTTCGATCCCACCCAGGGACGGAAGTCGCATTTTG	CGCGTTCGGCTGTTAACCGAAAGGTTGGTGGTACGATCCCACCCAGGGACGGAAGTCGCATTTTG
pseudouridine	chr1:161540296(+)	DM-Ψ-seq (High)	Human	AL590385.2	rs1233620085	chr1:161540296..161540296	dbSNP153	RBP 24, circRNA 2		CGCGTTCGGCTGTTAACCGAAAGGTTGGTGGTTCGATCCCACCCAGGGACGGAAGTCGCATTTTG	CGCGTTCGGCTGTTAACCGAAAGGTTGGTGGTCCGATCCCACCCAGGGACGGAAGTCGCATTTTG
pseudouridine	chr1:16535286(-)	DM-Ψ-seq (High)	Human	LINC01783	rs373548915	chr1:16535286..16535286	dbSNP153	RBP 24, circRNA 2		TTTCACCGCCGCGGCCCGGGTTCGATTCCCGGTCAGGGAATTGTTTTACACTGGCCGCCCTCCCG	TTTCACCGCCGCGGCCCGGGTTCGATTCCCGGCCAGGGAATTGTTTTACACTGGCCGCCCTCCCG
pseudouridine	chr1:16872590(+)	DM-Ψ-seq (High)	Human	CROCC,BX284668.2	rs1477151014	chr1:16872590..16872590	dbSNP153	RBP 8		GGGAGACAAAGCTCCCTCCTGTGTGTCCCTGGTGGTCTAGTGGCTAGGATTCGGCGCTTTCACCG	GGGAGACAAAGCTCCCTCCTGTGTGTCCCTGGCGGTCTAGTGGCTAGGATTCGGCGCTTTCACCG
pseudouridine	chr1:16872590(+)	DM-Ψ-seq (High)	Human	CROCC,BX284668.2	rs1477151014	chr1:16872590..16872590	dbSNP153	RBP 8		GGGAGACAAAGCTCCCTCCTGTGTGTCCCTGGTGGTCTAGTGGCTAGGATTCGGCGCTTTCACCG	GGGAGACAAAGCTCCCTCCTGTGTGTCCCTGGGGGTCTAGTGGCTAGGATTCGGCGCTTTCACCG
pseudouridine	chr1:16872595(+)	DM-Ψ-seq (High)	Human	CROCC,BX284668.2	rs1273703841	chr1:16872593..16872593	dbSNP153	RBP 8		ACAAAGCTCCCTCCTGTGTGTCCCTGGTGGTCTAGTGGCTAGGATTCGGCGCTTTCACCGCCGCG	ACAAAGCTCCCTCCTGTGTGTCCCTGGTGGCCTAGTGGCTAGGATTCGGCGCTTTCACCGCCGCG
pseudouridine	chr1:16872595(+)	DM-Ψ-seq (High)	Human	CROCC,BX284668.2	rs1211662661	chr1:16872595..16872595	dbSNP153	RBP 8		ACAAAGCTCCCTCCTGTGTGTCCCTGGTGGTCTAGTGGCTAGGATTCGGCGCTTTCACCGCCGCG	ACAAAGCTCCCTCCTGTGTGTCCCTGGTGGTCCAGTGGCTAGGATTCGGCGCTTTCACCGCCGCG
pseudouridine	chr1:16872595(+)	DM-Ψ-seq (High)	Human	CROCC,BX284668.2	rs1430068366	chr1:16872596..16872596	dbSNP153	RBP 8		ACAAAGCTCCCTCCTGTGTGTCCCTGGTGGTCTAGTGGCTAGGATTCGGCGCTTTCACCGCCGCG	ACAAAGCTCCCTCCTGTGTGTCCCTGGTGGTCTGGTGGCTAGGATTCGGCGCTTTCACCGCCGCG
pseudouridine	chr1:16872595(+)	DM-Ψ-seq (High)	Human	CROCC,BX284668.2	rs1430068366	chr1:16872596..16872596	dbSNP153	RBP 8		ACAAAGCTCCCTCCTGTGTGTCCCTGGTGGTCTAGTGGCTAGGATTCGGCGCTTTCACCGCCGCG	ACAAAGCTCCCTCCTGTGTGTCCCTGGTGGTCTTGTGGCTAGGATTCGGCGCTTTCACCGCCGCG
pseudouridine	chr1:16872636(+)	DM-Ψ-seq (High)	Human	CROCC,BX284668.2	rs1407146794	chr1:16872636..16872636	dbSNP153	RBP 24		GGATTCGGCGCTTTCACCGCCGCGGCCCGGGTTCGATTCCCGGCCAGGGAATTGTTTTACACTGG	GGATTCGGCGCTTTCACCGCCGCGGCCCGGGTGCGATTCCCGGCCAGGGAATTGTTTTACACTGG
pseudouridine	chr1:167715541(-)	DM-Ψ-seq (High)	Human	lnc-ADCY10-2,TRP2,TRP-AGG1-1	rs925568680	chr1:167715541..167715541	dbSNP153	RBP 11		GTGGAGTTTGTGTCGGCTCGTTGGTCTAGGGGTATGATTCTCGCTTAGGGTGCGAGAGGTCCCGG	GTGGAGTTTGTGTCGGCTCGTTGGTCTAGGGGGATGATTCTCGCTTAGGGTGCGAGAGGTCCCGG
pseudouridine	chr1:204506553(+)	DM-Ψ-seq (High)	Human	TRK1,TRK-TTT3-1,lnc-MDM4-11,tRNA-Lys-TTT-3-1	rs543277627	chr1:204506553..204506553	dbSNP153	RBP 24		GGGAGCGCCCGGATAGCTCAGTCGGTAGAGCATCAGACTTTTAATCTGAGGGTCCAGGGTTCAAG	GGGAGCGCCCGGATAGCTCAGTCGGTAGAGCAACAGACTTTTAATCTGAGGGTCCAGGGTTCAAG
pseudouridine	chr1:204506553(+)	DM-Ψ-seq (High)	Human	TRK1,TRK-TTT3-1,lnc-MDM4-11,tRNA-Lys-TTT-3-1	rs543277627	chr1:204506553..204506553	dbSNP153	RBP 24		GGGAGCGCCCGGATAGCTCAGTCGGTAGAGCATCAGACTTTTAATCTGAGGGTCCAGGGTTCAAG	GGGAGCGCCCGGATAGCTCAGTCGGTAGAGCACCAGACTTTTAATCTGAGGGTCCAGGGTTCAAG
pseudouridine	chr1:204506553(+)	DM-Ψ-seq (High)	Human	TRK1,TRK-TTT3-1,lnc-MDM4-11,tRNA-Lys-TTT-3-1	rs543277627	chr1:204506553..204506553	dbSNP153	RBP 24		GGGAGCGCCCGGATAGCTCAGTCGGTAGAGCATCAGACTTTTAATCTGAGGGTCCAGGGTTCAAG	GGGAGCGCCCGGATAGCTCAGTCGGTAGAGCAGCAGACTTTTAATCTGAGGGTCCAGGGTTCAAG
pseudouridine	chr1:204506565(+)	DM-Ψ-seq (High)	Human	TRK1,TRK-TTT3-1,lnc-MDM4-11,tRNA-Lys-TTT-3-1	rs571183373	chr1:204506565..204506565	dbSNP153	RBP 16		ATAGCTCAGTCGGTAGAGCATCAGACTTTTAATCTGAGGGTCCAGGGTTCAAGTCCCTGTTCGGG	ATAGCTCAGTCGGTAGAGCATCAGACTTTTAACCTGAGGGTCCAGGGTTCAAGTCCCTGTTCGGG
pseudouridine	chr1:204506565(+)	DM-Ψ-seq (High)	Human	TRK1,TRK-TTT3-1,lnc-MDM4-11,tRNA-Lys-TTT-3-1	rs571183373	chr1:204506565..204506565	dbSNP153	RBP 16		ATAGCTCAGTCGGTAGAGCATCAGACTTTTAATCTGAGGGTCCAGGGTTCAAGTCCCTGTTCGGG	ATAGCTCAGTCGGTAGAGCATCAGACTTTTAAGCTGAGGGTCCAGGGTTCAAGTCCCTGTTCGGG
pseudouridine	chr1:204506581(+)	DM-Ψ-seq (High)	Human	TRK1,TRK-TTT3-1,lnc-MDM4-11,tRNA-Lys-TTT-3-1	rs1301674508	chr1:204506581..204506581	dbSNP153	RBP 24		AGCATCAGACTTTTAATCTGAGGGTCCAGGGTTCAAGTCCCTGTTCGGGCGTTTGTAGTTTTCGT	AGCATCAGACTTTTAATCTGAGGGTCCAGGGTCCAAGTCCCTGTTCGGGCGTTTGTAGTTTTCGT
pseudouridine	chr1:204506581(+)	DM-Ψ-seq (High)	Human	TRK1,TRK-TTT3-1,lnc-MDM4-11,tRNA-Lys-TTT-3-1	rs1301674508	chr1:204506581..204506581	dbSNP153	RBP 24		AGCATCAGACTTTTAATCTGAGGGTCCAGGGTTCAAGTCCCTGTTCGGGCGTTTGTAGTTTTCGT	AGCATCAGACTTTTAATCTGAGGGTCCAGGGTGCAAGTCCCTGTTCGGGCGTTTGTAGTTTTCGT
pseudouridine	chr1:33009335(+)	CeU-seq (High)	Human	AL020995.1	rs1210509745	chr1:33009335..33009335	dbSNP153		Detail	TCACTTTTGCTGGAGAGGAAATGAATTTAAACTAGGACACACAGAGAAGCAACAAAGAGTGTTAA	TCACTTTTGCTGGAGAGGAAATGAATTTAAACCAGGACACACAGAGAAGCAACAAAGAGTGTTAA
pseudouridine	chr1:93847608(+)	DM-Ψ-seq (High)	Human	AL049796.1	rs892507048	chr1:93847610..93847610	dbSNP153	RBP 24, miRNA 1		TCCGTGGCGCAATGGATAGCGCATTGGACTTCTAGAGGCTGAAGGCATTCAAAGGTTCCGGGTTC	TCCGTGGCGCAATGGATAGCGCATTGGACTTCTACAGGCTGAAGGCATTCAAAGGTTCCGGGTTC
pseudouridine	chr1:93847638(+)	DM-Ψ-seq (High)	Human	AL049796.1	rs1557710113	chr1:93847638..93847638	dbSNP153	RBP 25		TCTAGAGGCTGAAGGCATTCAAAGGTTCCGGGTTCGAGTCCCGGCGGAGTCGTAACGCTTTTTTC	TCTAGAGGCTGAAGGCATTCAAAGGTTCCGGGCTCGAGTCCCGGCGGAGTCGTAACGCTTTTTTC
pseudouridine	chr1:99008287(+)	RBS_seq (High)	Human	AL445433.2,AL445433.1	rs1238653376	chr1:99008287..99008287	dbSNP153	miRNA 1		TCAATACATAAAGAACAGTGTAACTCCAGACATGATGGAGGAGATGTATAAGAAAGCTCATGCTG	TCAATACATAAAGAACAGTGTAACTCCAGACACGATGGAGGAGATGTATAAGAAAGCTCATGCTG
pseudouridine	chr21:24509539(+)	pseudo-seq (High)	Human	LINC01684	rs909629241	chr21:24509539..24509539	dbSNP153		Detail	ATTTTAAACATATATAATTATTTAGATTTCAGTGTTCTATAAATCCTAATGAGAGATGAAGCCAG	ATTTTAAACATATATAATTATTTAGATTTCAGCGTTCTATAAATCCTAATGAGAGATGAAGCCAG
pseudouridine	chr22:26445915(+)	CeU-seq (High)	Human	lnc-ASPHD2-1	rs530451635	chr22:26445915..26445915	dbSNP153		Detail	TTTTCCCTTTAGAAGAGAGGGAGACAGGGGGGTCTCCCAGCCAGGAGCCCTAGAAGCAGCCGGGC	TTTTCCCTTTAGAAGAGAGGGAGACAGGGGGGCCTCCCAGCCAGGAGCCCTAGAAGCAGCCGGGC
pseudouridine	chr22:30924328(+)	CeU-seq (High)	Human	MORC2-AS1	rs958532947	chr22:30924328..30924328	dbSNP153		Detail	CCTTGCTTTTCATGGTCCAGCCTTTTAGACGGTTTTAATGTTTACCATGTGCATGTTTCACTTAA	CCTTGCTTTTCATGGTCCAGCCTTTTAGACGGCTTTAATGTTTACCATGTGCATGTTTCACTTAA
pseudouridine	chr2:215634227(+)	pseudo-seq (High)	Human	AC012668.3	rs1394870474	chr2:215634226..215634227	dbSNP153		Detail	ATATGTTTTCCAAGTTGCTTCCTTTCTCTCCCTCTCTTTCAAGGAGGCTTATAAGTCATAAATTT	ATATGTTTTCCAAGTTGCTTCCTTTCTCTCCC_CTCTTTCAAGGAGGCTTATAAGTCATAAATTT
pseudouridine	chr2:42810571(-)	Ψ-seq (High)	Human	lnc-HAAO-1,lnc-HAAO-1:2	rs1428585860	chr2:42810569..42810569	dbSNP153		Detail	AACCTCGGCATTGCTCTGCATGTACTGCTGTATAAGTACCGCGCGCTAACCGATTGCGCCACTGG	AACCTCGGCATTGCTCTGCATGTACTGCTGTATATGTACCGCGCGCTAACCGATTGCGCCACTGG
pseudouridine	chr2:42810575(-)	DM-Ψ-seq (High)	Human	lnc-HAAO-1,lnc-HAAO-1:2	rs1558690754	chr2:42810575..42810575	dbSNP153		Detail	TCACAACCTCGGCATTGCTCTGCATGTACTGCTGTATAAGTACCGCGCGCTAACCGATTGCGCCA	TCACAACCTCGGCATTGCTCTGCATGTACTGCCGTATAAGTACCGCGCGCTAACCGATTGCGCCA
pseudouridine	chr2:42810594(+)	DM-Ψ-seq (High)	Human	lnc-MTA3-5,lnc-MTA3-6,TRI-TAT2-1,tRNA-Ile-TAT-2-1	rs1475461726	chr2:42810594..42810594	dbSNP153	RBP 24		GCGGTACTTATACAGCAGTACATGCAGAGCAATGCCGAGGTTGTGAGTTCGAGCCTCACCTGGAG	GCGGTACTTATACAGCAGTACATGCAGAGCAACGCCGAGGTTGTGAGTTCGAGCCTCACCTGGAG
pseudouridine	chr3:121771188(+)	CeU-seq (High)	Human	lnc-EAF2-2	rs920614117	chr3:121771188..121771188	dbSNP153		Detail	AGACGGGCGTTTCACCATGTTGGTCAGGCTGGTCTCGAACTCCTGACCTCAGATGATCCACCTAC	AGACGGGCGTTTCACCATGTTGGTCAGGCTGGCCTCGAACTCCTGACCTCAGATGATCCACCTAC
pseudouridine	chr3:45689025(-)	DM-Ψ-seq (High)	Human	LIMD1-AS1	rs1237746401	chr3:45689025..45689025	dbSNP153	RBP 24, Splice 1		ATGGATAACGCGTCTGACTACGGATCAGAAGATTCTAGGTTCGACTCCTGGCTGGCTCGCGATGT	ATGGATAACGCGTCTGACTACGGATCAGAAGAGTCTAGGTTCGACTCCTGGCTGGCTCGCGATGT
pseudouridine	chr4:151670660(+)	CeU-seq (High)	Human	lnc-FAM160A1-1	rs1342012747	chr4:151670660..151670660	dbSNP153		Detail	TTGAGACCTCCTTAAACAAACAAATGTGTTTATACTGTGCCAGTTTATTTGGTTGTATTTTCATC	TTGAGACCTCCTTAAACAAACAAATGTGTTTACACTGTGCCAGTTTATTTGGTTGTATTTTCATC
pseudouridine	chr5:178055673(+)	RBS_seq (High)	Human	AC136632.1,FAM153CP	rs1009377452	chr5:178055673..178055673	dbSNP153	RBP 1		GTGTCCTCCGCTGTGGCAAGAAGAAGGTCTGGTTAGACCCCAGTGAGACCAATGAAATCGCCAAT	GTGTCCTCCGCTGTGGCAAGAAGAAGGTCTGGCTAGACCCCAGTGAGACCAATGAAATCGCCAAT
pseudouridine	chr5:181188442(-)	DM-Ψ-seq (High)	Human	LINC01962	rs910480298	chr5:181188442..181188442	dbSNP153	RBP 24		GTGGTCATCACGTTCGCCTAACACGCGAAAGGTCCCCGGTTCGAAACCGGGCGGAAACATGCCAC	GTGGTCATCACGTTCGCCTAACACGCGAAAGGCCCCCGGTTCGAAACCGGGCGGAAACATGCCAC
pseudouridine	chr5:181188470(-)	DM-Ψ-seq (High)	Human	LINC01962	rs767303298	chr5:181188470..181188470	dbSNP153	RBP 24		AGAGGTAGGTGTGGGTTTCCGTAGTGTAGTGGTCATCACGTTCGCCTAACACGCGAAAGGTCCCC	AGAGGTAGGTGTGGGTTTCCGTAGTGTAGTGGGCATCACGTTCGCCTAACACGCGAAAGGTCCCC
pseudouridine	chr5:181188470(-)	DM-Ψ-seq (High)	Human	LINC01962	rs767303298	chr5:181188470..181188470	dbSNP153	RBP 24		AGAGGTAGGTGTGGGTTTCCGTAGTGTAGTGGTCATCACGTTCGCCTAACACGCGAAAGGTCCCC	AGAGGTAGGTGTGGGTTTCCGTAGTGTAGTGGCCATCACGTTCGCCTAACACGCGAAAGGTCCCC
pseudouridine	chr5:181188907(-)	DM-Ψ-seq (High)	Human	LINC01962	rs1158399097	chr5:181188907..181188907	dbSNP153	RBP 20		GCAACTAGACAGCCGGCTCGTTGGTCTAGGGGTATGATTCTCGCTTTGGGTGCGAGAGGTCCCGG	GCAACTAGACAGCCGGCTCGTTGGTCTAGGGGCATGATTCTCGCTTTGGGTGCGAGAGGTCCCGG
pseudouridine	chr5:181191739(-)	DM-Ψ-seq (High)	Human	LINC01962	rs919150078	chr5:181191739..181191739	dbSNP153	RBP 24		GAAACCAACAGCCGGCTCCATAGCTCAGGGGTTAGAGCACTGGTCTTGTAAACCAGGGTCGCGAG	GAAACCAACAGCCGGCTCCATAGCTCAGGGGTCAGAGCACTGGTCTTGTAAACCAGGGTCGCGAG
pseudouridine	chr5:181191739(-)	DM-Ψ-seq (High)	Human	LINC01962	rs919150078	chr5:181191739..181191739	dbSNP153	RBP 24		GAAACCAACAGCCGGCTCCATAGCTCAGGGGTTAGAGCACTGGTCTTGTAAACCAGGGTCGCGAG	GAAACCAACAGCCGGCTCCATAGCTCAGGGGTAAGAGCACTGGTCTTGTAAACCAGGGTCGCGAG
pseudouridine	chr6:125780300(-)	DM-Ψ-seq (High)	Human	tRNA-Glu-CTC-1-1,piR-60565,tRNA-Glu-CTC-2-1,AB330770-001,lnc-HDDC2-15,AB330770-001:2,lnc-HDDC2-11,piR-33123	rs1245605054	chr6:125780300..125780300	dbSNP153	RBP 21		AGCGTTGTGCAAGTTCCCTGGTGGTCTAGTGGTTAGGATTCGGCGCTCTCACCGCCGCGGCCCGG	AGCGTTGTGCAAGTTCCCTGGTGGTCTAGTGGCTAGGATTCGGCGCTCTCACCGCCGCGGCCCGG
pseudouridine	chr6:26299703(+)	DM-Ψ-seq (High)	Human	tRNA-Arg-TCG-4-1,tRNA-Arg,lnc-HIST1H2BI-2	rs1334809964	chr6:26299703..26299703	dbSNP153	RBP 8		GCGGGGGACCACGTGGCCTAATGGATAAGGCGTCTGACTTCGGATCAGAAGATTGAGGGTTCGAA	GCGGGGGACCACGTGGCCTAATGGATAAGGCGCCTGACTTCGGATCAGAAGATTGAGGGTTCGAA
pseudouridine	chr6:26299715(+)	DM-Ψ-seq (High)	Human	tRNA-Arg-TCG-4-1,tRNA-Arg,lnc-HIST1H2BI-2	rs1261990400	chr6:26299715..26299715	dbSNP153	RBP 10		GTGGCCTAATGGATAAGGCGTCTGACTTCGGATCAGAAGATTGAGGGTTCGAATCCCTTCGTGGT	GTGGCCTAATGGATAAGGCGTCTGACTTCGGAACAGAAGATTGAGGGTTCGAATCCCTTCGTGGT
pseudouridine	chr6:26319154(+)	DM-Ψ-seq (High)	Human	lnc-BTN3A2-3,lnc-HIST1H2BI-3	rs955356391	chr6:26319154..26319154	dbSNP153		Detail	CACGCAACCTTCTGATCTGGAGTCAGACGCGCTACCGTTGCGCCACGAGGTCACGGAGACCCTCC	CACGCAACCTTCTGATCTGGAGTCAGACGCGCCACCGTTGCGCCACGAGGTCACGGAGACCCTCC
pseudouridine	chr6:26328166(+)	DM-Ψ-seq (High)	Human	lnc-BTN3A2-1,tRNA-Arg,tRNA-Arg-ACG-1-3	rs1045920961	chr6:26328166..26328166	dbSNP153	RBP 8		GTCAGAGGGCCAGTGGCGCAATGGATAACGCGTCTGACTACGGATCAGAAGATTCCAGGTTCGAC	GTCAGAGGGCCAGTGGCGCAATGGATAACGCGCCTGACTACGGATCAGAAGATTCCAGGTTCGAC
pseudouridine	chr6:26328178(+)	DM-Ψ-seq (High)	Human	lnc-BTN3A2-1,tRNA-Arg,piR-41435,tRNA-Arg-ACG-1-3	rs1020303971	chr6:26328178..26328178	dbSNP153	RBP 17		GTGGCGCAATGGATAACGCGTCTGACTACGGATCAGAAGATTCCAGGTTCGACTCCTGGCTGGCT	GTGGCGCAATGGATAACGCGTCTGACTACGGACCAGAAGATTCCAGGTTCGACTCCTGGCTGGCT
pseudouridine	chr6:26328194(+)	DM-Ψ-seq (High)	Human	lnc-BTN3A2-1,tRNA-Arg,piR-41435,piR-42844,tRNA-Arg-ACG-1-3	rs1157770016	chr6:26328194..26328194	dbSNP153	RBP 24		CGCGTCTGACTACGGATCAGAAGATTCCAGGTTCGACTCCTGGCTGGCTCGTTCGACTTTAGTGG	CGCGTCTGACTACGGATCAGAAGATTCCAGGTGCGACTCCTGGCTGGCTCGTTCGACTTTAGTGG
pseudouridine	chr6:26756587(-)	DM-Ψ-seq (High)	Human	HSALNG0050851-001	rs1554159529	chr6:26756587..26756587	dbSNP153	RBP 2		GTACGGGGATCGAACCCGCGACCTTAGCGTTATTAGCACCACGCTCTAACCAACTGAGCTAACCG	GTACGGGGATCGAACCCGCGACCTTAGCGTTACTAGCACCACGCTCTAACCAACTGAGCTAACCG
pseudouridine	chr6:26756596(-)	DM-Ψ-seq (High)	Human	HSALNG0050851-001	rs1382240273	chr6:26756596..26756596	dbSNP153	RBP 2		GTCTGGCCAGTACGGGGATCGAACCCGCGACCTTAGCGTTATTAGCACCACGCTCTAACCAACTG	GTCTGGCCAGTACGGGGATCGAACCCGCGACCGTAGCGTTATTAGCACCACGCTCTAACCAACTG
pseudouridine	chr6:27020376(+)	DM-Ψ-seq (High)	Human	LINC00240	rs1306734259	chr6:27020376..27020376	dbSNP153	RBP 21, Splice 1		GTGCTCCAGTGGCGCAATCGGTTAGCGCGCGGTACTTATATGGCAGTATGTGTGCGAGTGATGCC	GTGCTCCAGTGGCGCAATCGGTTAGCGCGCGGCACTTATATGGCAGTATGTGTGCGAGTGATGCC
pseudouridine	chr6:27020421(+)	DM-Ψ-seq (High)	Human	LINC00240	rs936688016	chr6:27020421..27020421	dbSNP153	RBP 24		GTATGTGTGCGAGTGATGCCGAGGTTGTGAGTTCGAGCCTCACCTGGAGCATTGTTTTCCAACCC	GTATGTGTGCGAGTGATGCCGAGGTTGTGAGTGCGAGCCTCACCTGGAGCATTGTTTTCCAACCC
pseudouridine	chr6:27091754(+)	DM-Ψ-seq (High)	Human	lnc-HIST1H2AG-4,tRNA-Pro-CGG-2-1	rs756728563	chr6:27091752..27091752	dbSNP153	RBP 23		AGCAAAAGCCATTTCTAAGTGGCTCGTTGGTCTAGGGGTATGATTCTCGCTTCGGGTGTGAGAGG	AGCAAAAGCCATTTCTAAGTGGCTCGTTGGCCTAGGGGTATGATTCTCGCTTCGGGTGTGAGAGG
pseudouridine	chr6:27091754(+)	DM-Ψ-seq (High)	Human	lnc-HIST1H2AG-4,tRNA-Pro-CGG-2-1	rs756728563	chr6:27091752..27091752	dbSNP153	RBP 23		AGCAAAAGCCATTTCTAAGTGGCTCGTTGGTCTAGGGGTATGATTCTCGCTTCGGGTGTGAGAGG	AGCAAAAGCCATTTCTAAGTGGCTCGTTGGGCTAGGGGTATGATTCTCGCTTCGGGTGTGAGAGG
pseudouridine	chr6:27091754(+)	DM-Ψ-seq (High)	Human	lnc-HIST1H2AG-4,tRNA-Pro-CGG-2-1	rs929501700	chr6:27091754..27091754	dbSNP153	RBP 23		AGCAAAAGCCATTTCTAAGTGGCTCGTTGGTCTAGGGGTATGATTCTCGCTTCGGGTGTGAGAGG	AGCAAAAGCCATTTCTAAGTGGCTCGTTGGTCGAGGGGTATGATTCTCGCTTCGGGTGTGAGAGG
pseudouridine	chr6:27091754(+)	DM-Ψ-seq (High)	Human	lnc-HIST1H2AG-4,tRNA-Pro-CGG-2-1	rs994982765	chr6:27091755..27091755	dbSNP153	RBP 23		AGCAAAAGCCATTTCTAAGTGGCTCGTTGGTCTAGGGGTATGATTCTCGCTTCGGGTGTGAGAGG	AGCAAAAGCCATTTCTAAGTGGCTCGTTGGTCTGGGGGTATGATTCTCGCTTCGGGTGTGAGAGG
pseudouridine	chr6:27091795(+)	DM-Ψ-seq (High)	Human	lnc-HIST1H2AG-4,tRNA-Pro-CGG-2-1	rs930890214	chr6:27091795..27091795	dbSNP153	RBP 22		GATTCTCGCTTCGGGTGTGAGAGGTCCCGGGTTCAAATCCCGGACGAGCCCACTTCATTTTCGCC	GATTCTCGCTTCGGGTGTGAGAGGTCCCGGGTCCAAATCCCGGACGAGCCCACTTCATTTTCGCC
pseudouridine	chr6:27097344(+)	DM-Ψ-seq (High)	Human	tRNA-Ser-GCT-1-1,lnc-HIST1H2AG-4	rs1410809633	chr6:27097344..27097344	dbSNP153	RBP 10		GTGGCCGAGTGGTTAAGGCGATGGACTGCTAATCCATTGTGCTCTGCACGCGTGGGTTCGAATCC	GTGGCCGAGTGGTTAAGGCGATGGACTGCTAAGCCATTGTGCTCTGCACGCGTGGGTTCGAATCC
pseudouridine	chr6:27158139(+)	DM-Ψ-seq (High)	Human	tRNA-His-GTG-1-1,lnc-HIST1H2AH-5,tRNA-His-GTG-2-1	rs1023163476	chr6:27158140..27158140	dbSNP153	RBP 17		GCAGCGGCCTCTGGTGGCGTGCCGTGATCGTATAGTGGTTAGTACTCTGCGTTGTGGCCGCAGCA	GCAGCGGCCTCTGGTGGCGTGCCGTGATCGTATCGTGGTTAGTACTCTGCGTTGTGGCCGCAGCA
pseudouridine	chr6:27158158(+)	DM-Ψ-seq (High)	Human	tRNA-His-GTG-1-1,lnc-HIST1H2AH-5,tRNA-His-GTG-2-1	rs918332249	chr6:27158158..27158158	dbSNP153	RBP 9		TGCCGTGATCGTATAGTGGTTAGTACTCTGCGTTGTGGCCGCAGCAACCTCGGTTCGAATCCGAG	TGCCGTGATCGTATAGTGGTTAGTACTCTGCGCTGTGGCCGCAGCAACCTCGGTTCGAATCCGAG
pseudouridine	chr6:27158179(+)	DM-Ψ-seq (High)	Human	tRNA-His-GTG-1-1,lnc-HIST1H2AH-5,tRNA-His-GTG-2-1	rs549658996	chr6:27158179..27158179	dbSNP153	RBP 2		AGTACTCTGCGTTGTGGCCGCAGCAACCTCGGTTCGAATCCGAGTCACGGCAGTACCTTGATGTC	AGTACTCTGCGTTGTGGCCGCAGCAACCTCGGCTCGAATCCGAGTCACGGCAGTACCTTGATGTC
pseudouridine	chr6:27478839(+)	DM-Ψ-seq (High)	Human	AL021918.5	rs1033158624	chr6:27478839..27478839	dbSNP153	RBP 2		TTCGTGTAGTCGTGGCCGAGTGGTTAAGGCGATGGACTAGAAATCCATTGGGGTCTCCCCGCGCA	TTCGTGTAGTCGTGGCCGAGTGGTTAAGGCGACGGACTAGAAATCCATTGGGGTCTCCCCGCGCA
pseudouridine	chr6:27478839(+)	DM-Ψ-seq (High)	Human	AL021918.5	rs1033158624	chr6:27478839..27478839	dbSNP153	RBP 2		TTCGTGTAGTCGTGGCCGAGTGGTTAAGGCGATGGACTAGAAATCCATTGGGGTCTCCCCGCGCA	TTCGTGTAGTCGTGGCCGAGTGGTTAAGGCGAGGGACTAGAAATCCATTGGGGTCTCCCCGCGCA
pseudouridine	chr6:27479686(+)	DM-Ψ-seq (High)	Human	AL021918.5	rs949699622	chr6:27479684..27479684	dbSNP153	RBP 12		AGCTCCATTTTCACGTCAATTCCTCGTTAGTATAGTGGTGAGTATCCCCGCCTGTCACGCGGGAG	AGCTCCATTTTCACGTCAATTCCTCGTTAGCATAGTGGTGAGTATCCCCGCCTGTCACGCGGGAG
pseudouridine	chr6:27479686(+)	DM-Ψ-seq (High)	Human	AL021918.5	rs949699622	chr6:27479684..27479684	dbSNP153	RBP 12		AGCTCCATTTTCACGTCAATTCCTCGTTAGTATAGTGGTGAGTATCCCCGCCTGTCACGCGGGAG	AGCTCCATTTTCACGTCAATTCCTCGTTAGGATAGTGGTGAGTATCCCCGCCTGTCACGCGGGAG
pseudouridine	chr6:27479686(+)	DM-Ψ-seq (High)	Human	AL021918.5	rs983308146	chr6:27479686..27479686	dbSNP153	RBP 12		AGCTCCATTTTCACGTCAATTCCTCGTTAGTATAGTGGTGAGTATCCCCGCCTGTCACGCGGGAG	AGCTCCATTTTCACGTCAATTCCTCGTTAGTACAGTGGTGAGTATCCCCGCCTGTCACGCGGGAG
pseudouridine	chr6:27479686(+)	DM-Ψ-seq (High)	Human	AL021918.5	rs981041967	chr6:27479687..27479687	dbSNP153	RBP 12		AGCTCCATTTTCACGTCAATTCCTCGTTAGTATAGTGGTGAGTATCCCCGCCTGTCACGCGGGAG	AGCTCCATTTTCACGTCAATTCCTCGTTAGTATGGTGGTGAGTATCCCCGCCTGTCACGCGGGAG
pseudouridine	chr6:27479686(+)	DM-Ψ-seq (High)	Human	AL021918.5	rs981041967	chr6:27479687..27479687	dbSNP153	RBP 12		AGCTCCATTTTCACGTCAATTCCTCGTTAGTATAGTGGTGAGTATCCCCGCCTGTCACGCGGGAG	AGCTCCATTTTCACGTCAATTCCTCGTTAGTATTGTGGTGAGTATCCCCGCCTGTCACGCGGGAG
pseudouridine	chr6:27479727(+)	DM-Ψ-seq (High)	Human	AL021918.5	rs1263342550	chr6:27479727..27479727	dbSNP153	RBP 14		GTATCCCCGCCTGTCACGCGGGAGACCGGGGTTCGATTCCCCGACGGGGAGGAGGCTTAAACTTT	GTATCCCCGCCTGTCACGCGGGAGACCGGGGTGCGATTCCCCGACGGGGAGGAGGCTTAAACTTT
pseudouridine	chr6:27505866(-)	DM-Ψ-seq (High)	Human	AL021918.3	rs890633341	chr6:27505866..27505866	dbSNP153	RBP 12		CGAGTGGTTAAGGCGATGGACTTGAAATCCATTGGGGTTTCCCCGCGCAGGTTCGAATCCTGTCG	CGAGTGGTTAAGGCGATGGACTTGAAATCCATCGGGGTTTCCCCGCGCAGGTTCGAATCCTGTCG
pseudouridine	chr6:28478655(-)	DM-Ψ-seq (High)	Human	Z98745.2	rs920958228	chr6:28478655..28478655	dbSNP153	RBP 15		GTCTAAGACGCTGGATTAAGGCTCCAGTCTCTTCGGGGGCGTGGGTTTGAATCCCACCGCTGCCA	GTCTAAGACGCTGGATTAAGGCTCCAGTCTCTGCGGGGGCGTGGGTTTGAATCCCACCGCTGCCA
pseudouridine	chr6:28589386(+)	DM-Ψ-seq (High)	Human	AL049543.1	rs1158426960	chr6:28589386..28589386	dbSNP153	RBP 14 miRNA 1		ACTTACCTACTGTACCCTTGTGGTTGGTCCCATGGTGTAATGGTTAGCACTCTGGACTTTGAATC	ACTTACCTACTGTACCCTTGTGGTTGGTCCCACGGTGTAATGGTTAGCACTCTGGACTTTGAATC
pseudouridine	chr6:28589391(+)	DM-Ψ-seq (High)	Human	AL049543.1	rs1415013578	chr6:28589392..28589392	dbSNP153	RBP 16 miRNA 3		CCTACTGTACCCTTGTGGTTGGTCCCATGGTGTAATGGTTAGCACTCTGGACTTTGAATCCAGCA	CCTACTGTACCCTTGTGGTTGGTCCCATGGTGTCATGGTTAGCACTCTGGACTTTGAATCCAGCA
pseudouridine	chr6:28589391(+)	DM-Ψ-seq (High)	Human	AL049543.1	rs1415013578	chr6:28589392..28589392	dbSNP153	RBP 16 miRNA 3		CCTACTGTACCCTTGTGGTTGGTCCCATGGTGTAATGGTTAGCACTCTGGACTTTGAATCCAGCA	CCTACTGTACCCTTGTGGTTGGTCCCATGGTGTGATGGTTAGCACTCTGGACTTTGAATCCAGCA
pseudouridine	chr6:28589417(+)	DM-Ψ-seq (High)	Human	AL049543.1	rs1436829159	chr6:28589417..28589417	dbSNP153	RBP 24 miRNA 1		ATGGTGTAATGGTTAGCACTCTGGACTTTGAATCCAGCAATCCGAGTTCGAATCTCGGTGGGACC	ATGGTGTAATGGTTAGCACTCTGGACTTTGAACCCAGCAATCCGAGTTCGAATCTCGGTGGGACC
pseudouridine	chr6:28589432(+)	DM-Ψ-seq (High)	Human	AL049543.1	rs921913759	chr6:28589432..28589432	dbSNP153	RBP 24		GCACTCTGGACTTTGAATCCAGCAATCCGAGTTCGAATCTCGGTGGGACCTTTCAAAGGTGAACG	GCACTCTGGACTTTGAATCCAGCAATCCGAGTCCGAATCTCGGTGGGACCTTTCAAAGGTGAACG
pseudouridine	chr6:28643481(+)	DM-Ψ-seq (High)	Human	AL121932.2	rs1481579817	chr6:28643481..28643481	dbSNP153	RBP 11		ATGTAGCTCAGTGGTAGAGCGCATGCTTTGCATGTATGAGGTCCCGGGTTCGATCCCCGGCATCT	ATGTAGCTCAGTGGTAGAGCGCATGCTTTGCACGTATGAGGTCCCGGGTTCGATCCCCGGCATCT
pseudouridine	chr6:28695968(+)	DM-Ψ-seq (High)	Human	lnc-GPX5-3	rs139699428	chr6:28695968..28695968	dbSNP153			GGTACCAGGGATTGAACCAGGGACCTCGTACATGCGAAGCATGCGCTCTACCACTGATCTACACC	GGTACCAGGGATTGAACCAGGGACCTCGTACAAGCGAAGCATGCGCTCTACCACTGATCTACACC
pseudouridine	chr6:28695968(+)	DM-Ψ-seq (High)	Human	lnc-GPX5-3	rs139699428	chr6:28695968..28695968	dbSNP153			GGTACCAGGGATTGAACCAGGGACCTCGTACATGCGAAGCATGCGCTCTACCACTGATCTACACC	GGTACCAGGGATTGAACCAGGGACCTCGTACACGCGAAGCATGCGCTCTACCACTGATCTACACC
pseudouridine	chr6:28812125(-)	DM-Ψ-seq (High)	Human	lnc-TRIM27-18,TRA-AGC6-1,tRNA-Ala-AGC-6-1	rs1297025114	chr6:28812125..28812125	dbSNP153	RBP 24		GCAAGTCTTCCAGAGGGGGTATAGCTCAGCGGTAGAGCGCGTGCTTAGCATGCACGAGGTCCTGG	GCAAGTCTTCCAGAGGGGGTATAGCTCAGCGGAAGAGCGCGTGCTTAGCATGCACGAGGTCCTGG
pseudouridine	chr6:28817288(-)	DM-Ψ-seq (High)	Human	lnc-TRIM27-18,tRNA-Ala-TGC-5-1,TRA-TGC1-1,tRNA-Ala-TGC-7-1	rs1561957445	chr6:28817288..28817288	dbSNP153	RBP 16		AGACCTTATAGTGAGGGGGTGTAGCTCAGTGGTAGAGCGCATGCTTTGCATGTATGAGGCCTCGG	AGACCTTATAGTGAGGGGGTGTAGCTCAGTGGAAGAGCGCATGCTTTGCATGTATGAGGCCTCGG
pseudouridine	chr6:28838497(-)	DM-Ψ-seq (High)	Human	AL662890.1	rs1231579367	chr6:28838497..28838497	dbSNP153	RBP 15		AACCGTTTCAGTACGGGGGTGTAGCTCAGTGGTAGAGCGCGTGCTTAGCATGCACGAGGCCCCGG	AACCGTTTCAGTACGGGGGTGTAGCTCAGTGGCAGAGCGCGTGCTTAGCATGCACGAGGCCCCGG
pseudouridine	chr6:28863738(-)	DM-Ψ-seq (High)	Human	LINC01623	rs1029298040	chr6:28863738..28863738	dbSNP153	RBP 17		CACGTTGAGCGTTGGGGGGTGTAGCTCAGTGGTAGAGCGCGTGCTTAGCATGCACGAGGCCCCGG	CACGTTGAGCGTTGGGGGGTGTAGCTCAGTGGGAGAGCGCGTGCTTAGCATGCACGAGGCCCCGG
pseudouridine	chr6:28863738(-)	DM-Ψ-seq (High)	Human	LINC01623	rs1029298040	chr6:28863738..28863738	dbSNP153	RBP 17		CACGTTGAGCGTTGGGGGGTGTAGCTCAGTGGTAGAGCGCGTGCTTAGCATGCACGAGGCCCCGG	CACGTTGAGCGTTGGGGGGTGTAGCTCAGTGGCAGAGCGCGTGCTTAGCATGCACGAGGCCCCGG
pseudouridine	chr6:28941073(+)	DM-Ψ-seq (High)	Human	lnc-OR2J1-12,TRL-CAA1-2,TRL-CAA1-1-001,tRNA-Leu,tRNA-Leu:2,tRNA-Leu:3,TRL-CAA1-2:2,tRNA-Leu-CAA-1-1	rs767306107	chr6:28941071..28941071	dbSNP153	RBP 21		AGTGTCCCAGGTGTCAGGATGGCCGAGTGGTCTAAGGCGCCAGACTCAAGCTTGGCTTCCTCGTG	AGTGTCCCAGGTGTCAGGATGGCCGAGTGGGCTAAGGCGCCAGACTCAAGCTTGGCTTCCTCGTG
pseudouridine	chr6:28941092(+)	DM-Ψ-seq (High)	Human	lnc-OR2J1-12,TRL-CAA1-2,TRL-CAA1-1-001,tRNA-Leu,tRNA-Leu:2,tRNA-Leu:3,TRL-CAA1-2:2,tRNA-Leu-CAA-1-1	rs1287538337	chr6:28941092..28941092	dbSNP153	RBP 24		TGGCCGAGTGGTCTAAGGCGCCAGACTCAAGCTTGGCTTCCTCGTGTTGAGGATTCTGGTCTCCA	TGGCCGAGTGGTCTAAGGCGCCAGACTCAAGCCTGGCTTCCTCGTGTTGAGGATTCTGGTCTCCA
pseudouridine	chr6:28941092(+)	DM-Ψ-seq (High)	Human	lnc-OR2J1-12,TRL-CAA1-2,TRL-CAA1-1-001,tRNA-Leu,tRNA-Leu:2,tRNA-Leu:3,TRL-CAA1-2:2,tRNA-Leu-CAA-1-1	rs1287538337	chr6:28941092..28941092	dbSNP153	RBP 24		TGGCCGAGTGGTCTAAGGCGCCAGACTCAAGCTTGGCTTCCTCGTGTTGAGGATTCTGGTCTCCA	TGGCCGAGTGGTCTAAGGCGCCAGACTCAAGCGTGGCTTCCTCGTGTTGAGGATTCTGGTCTCCA
pseudouridine	chr6:28941113(+)	DM-Ψ-seq (High)	Human	lnc-OR2J1-12,TRL-CAA1-2,TRL-CAA1-1-001,tRNA-Leu,tRNA-Leu:2,tRNA-Leu:3,TRL-CAA1-2:2,tRNA-Leu-CAA-1-1	rs1364796897	chr6:28941113..28941113	dbSNP153	RBP 24		CAGACTCAAGCTTGGCTTCCTCGTGTTGAGGATTCTGGTCTCCAATGGAGGCGTGGGTTCGAATC	CAGACTCAAGCTTGGCTTCCTCGTGTTGAGGACTCTGGTCTCCAATGGAGGCGTGGGTTCGAATC
pseudouridine	chr6:28941114(+)	DM-Ψ-seq (High)	Human	lnc-OR2J1-12,TRL-CAA1-2,TRL-CAA1-1-001,tRNA-Leu,tRNA-Leu:2,tRNA-Leu:3,TRL-CAA1-2:2,tRNA-Leu-CAA-1-1	rs1007372444	chr6:28941114..28941114	dbSNP153	RBP 24		AGACTCAAGCTTGGCTTCCTCGTGTTGAGGATTCTGGTCTCCAATGGAGGCGTGGGTTCGAATCC	AGACTCAAGCTTGGCTTCCTCGTGTTGAGGATCCTGGTCTCCAATGGAGGCGTGGGTTCGAATCC
pseudouridine	chr6:28941114(+)	DM-Ψ-seq (High)	Human	lnc-OR2J1-12,TRL-CAA1-2,TRL-CAA1-1-001,tRNA-Leu,tRNA-Leu:2,tRNA-Leu:3,TRL-CAA1-2:2,tRNA-Leu-CAA-1-1	rs1007372444	chr6:28941114..28941114	dbSNP153	RBP 24		AGACTCAAGCTTGGCTTCCTCGTGTTGAGGATTCTGGTCTCCAATGGAGGCGTGGGTTCGAATCC	AGACTCAAGCTTGGCTTCCTCGTGTTGAGGATGCTGGTCTCCAATGGAGGCGTGGGTTCGAATCC
pseudouridine	chr7:141003085(+)	CeU-seq (High)	Human	lnc-TMEM178B-3	rs528321266	chr7:141003085..141003085	dbSNP153			ATAATCAGTAAGTACACTGTATCACAAACCCATGACTTTTGAATCTAAAACCCAGTCTTTTTACT	ATAATCAGTAAGTACACTGTATCACAAACCCAGGACTTTTGAATCTAAAACCCAGTCTTTTTACT
pseudouridine	chr7:149556737(+)	DM-Ψ-seq (High)	Human	TRC-GCA22-1-001,tRNA-Cys-GCA-22-1,lnc-KRBA1-1	rs879696025	chr7:149556737..149556737	dbSNP153	RBP 2		CAAGCAGGGCGTATAGCTCAGGGGTAGAGCATTTGACTGCAGATCAAGAGGTCCCCAGTTCAAAT	CAAGCAGGGCGTATAGCTCAGGGGTAGAGCATCTGACTGCAGATCAAGAGGTCCCCAGTTCAAAT
pseudouridine	chr7:149584750(+)	DM-Ψ-seq (High)	Human	tRNA-Cys-GCA-15-1,lnc-KRBA1-1	rs1002980287	chr7:149584750..149584750	dbSNP153	RBP 5		TATGACTGGGGGTATAGCTCAGGGGTAGAGCATTTGACTGCAGATCAAGAGGTCTCTGGTTCAAA	TATGACTGGGGGTATAGCTCAGGGGTAGAGCACTTGACTGCAGATCAAGAGGTCTCTGGTTCAAA
pseudouridine	chr7:149584751(+)	DM-Ψ-seq (High)	Human	tRNA-Cys-GCA-15-1,lnc-KRBA1-1	rs1384480097	chr7:149584751..149584751	dbSNP153	RBP 5		ATGACTGGGGGTATAGCTCAGGGGTAGAGCATTTGACTGCAGATCAAGAGGTCTCTGGTTCAAAT	ATGACTGGGGGTATAGCTCAGGGGTAGAGCATCTGACTGCAGATCAAGAGGTCTCTGGTTCAAAT
pseudouridine	chr7:149584751(+)	DM-Ψ-seq (High)	Human	tRNA-Cys-GCA-15-1,lnc-KRBA1-1	rs1384480097	chr7:149584751..149584751	dbSNP153	RBP 5		ATGACTGGGGGTATAGCTCAGGGGTAGAGCATTTGACTGCAGATCAAGAGGTCTCTGGTTCAAAT	ATGACTGGGGGTATAGCTCAGGGGTAGAGCATGTGACTGCAGATCAAGAGGTCTCTGGTTCAAAT
pseudouridine	chr7:149584778(+)	DM-Ψ-seq (High)	Human	tRNA-Cys-GCA-15-1,lnc-KRBA1-1	rs1017022194	chr7:149584778..149584778	dbSNP153	RBP 3		AGCATTTGACTGCAGATCAAGAGGTCTCTGGTTCAAATCCAGGTGCCCCCTACACTGTTCTACTT	AGCATTTGACTGCAGATCAAGAGGTCTCTGGTACAAATCCAGGTGCCCCCTACACTGTTCTACTT
pseudouridine	chr8:129841021(+)	CeU-seq (High)	Human	AC022973.5	rs1038406126	chr8:129841021..129841021	dbSNP153			TAGTTTGTTCCAACCATGAGATTTAGATTTCATGATTTAGGTTTTATGATCTTAAACTGAAACCT	TAGTTTGTTCCAACCATGAGATTTAGATTTCACGATTTAGGTTTTATGATCTTAAACTGAAACCT
pseudouridine	chr8:66113401(+)	DM-Ψ-seq (High)	Human	AC084082.1	rs1402749253	chr8:66113402..66113402	dbSNP153	RBP 19 miRNA 3		TTCGATAGCTCAGCTGGTAGAGCGGAGGACTGTAGCTACTTCCTCAGCAGGAGACATCCTTAGGT	TTCGATAGCTCAGCTGGTAGAGCGGAGGACTGTGGCTACTTCCTCAGCAGGAGACATCCTTAGGT
pseudouridine	chr8:66113405(+)	DM-Ψ-seq (High)	Human	AC084082.1	rs1401978345	chr8:66113405..66113405	dbSNP153	RBP 24 miRNA 2		ATAGCTCAGCTGGTAGAGCGGAGGACTGTAGCTACTTCCTCAGCAGGAGACATCCTTAGGTCGCT	ATAGCTCAGCTGGTAGAGCGGAGGACTGTAGCGACTTCCTCAGCAGGAGACATCCTTAGGTCGCT
pseudouridine	chr8:66113441(+)	DM-Ψ-seq (High)	Human	AC084082.1	rs1476401658	chr8:66113441..66113441	dbSNP153	RBP 25		TCCTCAGCAGGAGACATCCTTAGGTCGCTGGTTCGATTCCGGCTCGAAGGAGACAAGTGCGGTTT	TCCTCAGCAGGAGACATCCTTAGGTCGCTGGTGCGATTCCGGCTCGAAGGAGACAAGTGCGGTTT
pseudouridine	chr8:66114042(+)	DM-Ψ-seq (High)	Human	AC084082.1	rs1434752257	chr8:66114042..66114042	dbSNP153	RBP 18		AGCGGAGGACTGTAGGCGCGCGCCCGTGGCCATCCTTAGGTCGCTGGTTCGATTCCGGCTCGAAG	AGCGGAGGACTGTAGGCGCGCGCCCGTGGCCAGCCTTAGGTCGCTGGTTCGATTCCGGCTCGAAG
pseudouridine	chr8:66114243(+)	DM-Ψ-seq (High)	Human	AC084082.1	rs1279450418	chr8:66114243..66114243	dbSNP153	RBP 8		AGCGCTCGCTTAGCATGCGAGAGGTAGCGGGATCGATGCCCGCATCCTCCAGTTTTCCTTCCTGT	AGCGCTCGCTTAGCATGCGAGAGGTAGCGGGACCGATGCCCGCATCCTCCAGTTTTCCTTCCTGT
pseudouridine	chr9:136724885(-)	CeU-seq (High)	Human	SNHG7	rs1359229337	chr9:136724885..136724885	dbSNP153	RBP 10 Splice 2 miRNA 1		GCAGCCGCTGCCCCTGCCTGGGTGTTGCTGTGTATTCCTGCCGGCCAGGGGCCACTGCCAGGACC	GCAGCCGCTGCCCCTGCCTGGGTGTTGCTGTGCATTCCTGCCGGCCAGGGGCCACTGCCAGGACC
pseudouridine	chrX:3838407(+)	DM-Ψ-seq (High)	Human	lnc-ARSF-6	rs1436654495	chrX:3838407..3838407	dbSNP153			CGTGGCCGGTGCGGGAGTCGAGCCCGCGACCTTGGTGTTATCAGCACCACGCTCTTACCAACTGA	CGTGGCCGGTGCGGGAGTCGAGCCCGCGACCTCGGTGTTATCAGCACCACGCTCTTACCAACTGA

## Sheet: m5C
Modification Type	Chromosome Position	Source	Species	Gene	Genetic Variant(s)	SNP Position	Database	Transcriptome Regulation	Disease	Nucleotide Ref Seq	Nucleotide Alt Seq
m5C	chr1:23085532(-)	BS-Seq (High)	Human	AL031428.1,LUZP1	rs868134335	chr1:23085532..23085532	dbSNP153	RBP 2 miRNA 1 circRNA 2		AATAAAGGAATGGGGACCCAGAGGCTGGGTCCCTGGCTACCTTGTTATGAGGTTTTGTTATTTCT	AATAAAGGAATGGGGACCCAGAGGCTGGGTCCTTGGCTACCTTGTTATGAGGTTTTGTTATTTCT
m5C	chr1:23085532(-)	BS-Seq (High)	Human	AL031428.1,LUZP1	rs868134335	chr1:23085532..23085532	dbSNP153	RBP 2 miRNA 1 circRNA 2		AATAAAGGAATGGGGACCCAGAGGCTGGGTCCCTGGCTACCTTGTTATGAGGTTTTGTTATTTCT	AATAAAGGAATGGGGACCCAGAGGCTGGGTCCGTGGCTACCTTGTTATGAGGTTTTGTTATTTCT
m5C	chr1:23085546(-)	BS-Seq (High)	Human	AL031428.1,LUZP1	rs1004331713	chr1:23085546..23085546	dbSNP153	RBP 2 miRNA 4 circRNA 2		TGCTACCACTTCCCAATAAAGGAATGGGGACCCAGAGGCTGGGTCCCTGGCTACCTTGTTATGAG	TGCTACCACTTCCCAATAAAGGAATGGGGACCTAGAGGCTGGGTCCCTGGCTACCTTGTTATGAG
m5C	chr1:23085548(-)	BS-Seq (High)	Human	AL031428.1,LUZP1	rs1017097223	chr1:23085548..23085548	dbSNP153	RBP 2 miRNA 4 circRNA 2		AGTGCTACCACTTCCCAATAAAGGAATGGGGACCCAGAGGCTGGGTCCCTGGCTACCTTGTTATG	AGTGCTACCACTTCCCAATAAAGGAATGGGGATCCAGAGGCTGGGTCCCTGGCTACCTTGTTATG
m5C	chr1:23086087(-)	BS-Seq (High)	Human	AL031428.1,LUZP1	rs1223114758	chr1:23086087..23086087	dbSNP153	RBP 3 circRNA 2		TCCTGGAGGAAGCCTCCAAGTAGAGGGGAGACCTGGTAGTTGAATAGTTGTTTAATCAAGCCAAA	TCCTGGAGGAAGCCTCCAAGTAGAGGGGAGACTTGGTAGTTGAATAGTTGTTTAATCAAGCCAAA
m5C	chr1:28095104(-)	m5C-RIP-seq (High)	Human	lnc-EYA3-2	rs1411777087	chr1:28095104..28095104	dbSNP153			CCACTAGTATATCCCTGTTGATTTGTTTGTGCCTTTTATTAACTGCCATTTTCTAAAATTTTTTT	CCACTAGTATATCCCTGTTGATTTGTTTGTGCTTTTTATTAACTGCCATTTTCTAAAATTTTTTT
m5C	chr1:28095105(-)	m5C-RIP-seq (High)	Human	lnc-EYA3-2	rs1236784298	chr1:28095105..28095105	dbSNP153			CCCACTAGTATATCCCTGTTGATTTGTTTGTGCCTTTTATTAACTGCCATTTTCTAAAATTTTTT	CCCACTAGTATATCCCTGTTGATTTGTTTGTGTCTTTTATTAACTGCCATTTTCTAAAATTTTTT
m5C	chr1:28509358(+)	BS-Seq (High)	Human	RCC1,SNHG3	rs1171599330	chr1:28509358..28509358	dbSNP153	RBP 3 miRNA 4 circRNA 10		CCGCCTCCCAGGTTCAGGCGATTCTCCTGCCTCAGCCTCCCAAGTAGCTGCGACTACAGGCGTGT	CCGCCTCCCAGGTTCAGGCGATTCTCCTGCCTTAGCCTCCCAAGTAGCTGCGACTACAGGCGTGT
m5C	chr1:28509364(+)	BS-Seq (High)	Human	RCC1,SNHG3	rs1030062214	chr1:28509364..28509364	dbSNP153	RBP 3 miRNA 4 circRNA 10		CCCAGGTTCAGGCGATTCTCCTGCCTCAGCCTCCCAAGTAGCTGCGACTACAGGCGTGTAGCACC	CCCAGGTTCAGGCGATTCTCCTGCCTCAGCCTTCCAAGTAGCTGCGACTACAGGCGTGTAGCACC
m5C	chr1:28580689(-)	BS-Seq (High)	Human	SNHG12	rs538357972	chr1:28580689..28580689	dbSNP153	RBP 3 circRNA 4		TTTGTATCATTCTGAGGACCAAATGATGGGAACAATAAAATTGTTCATGACAGTTGTTCTCATTT	TTTGTATCATTCTGAGGACCAAATGATGGGAATAATAAAATTGTTCATGACAGTTGTTCTCATTT
m5C	chr1:84506152(-)	BS-Seq (High)	Human	GNG5,AL359762.3	rs1469213485	chr1:84506152..84506152	dbSNP153	RBP 9 miRNA 6 circRNA 2		CGCCCCCGCCGCGCGCCGCTGAGTTGTCTGGCCCCGCCGACCCACGGCCCACGACCCACCGACCC	CGCCCCCGCCGCGCGCCGCTGAGTTGTCTGGCTCCGCCGACCCACGGCCCACGACCCACCGACCC
m5C	chr1:84506152(-)	BS-Seq (High)	Human	GNG5,AL359762.3	rs1469213485	chr1:84506152..84506152	dbSNP153	RBP 9 miRNA 6 circRNA 2		CGCCCCCGCCGCGCGCCGCTGAGTTGTCTGGCCCCGCCGACCCACGGCCCACGACCCACCGACCC	CGCCCCCGCCGCGCGCCGCTGAGTTGTCTGGCACCGCCGACCCACGGCCCACGACCCACCGACCC
m5C	chr1:998004(-)	BS-Seq (High)	Human	AL645608.7	rs1392229713	chr1:998004..998004	dbSNP153			AGTTCACCAGGGCCCACGGGAGGCGAGCGAGCCCTCCCACCAGCACTGGCCCTCCAGGCCCCAGT	AGTTCACCAGGGCCCACGGGAGGCGAGCGAGCTCTCCCACCAGCACTGGCCCTCCAGGCCCCAGT
m5C	chr1:1355584(+)	BS-Seq (High)	Human	NONHSAG000093.2	rs770467449	chr1:1355584..1355584	dbSNP153			ACAAGTCCAGCAGGCGCCGCGCGGGGCCACCCCCGGGGCCGCGCAGGTCCCAGTGGAGCACGCGC	ACAAGTCCAGCAGGCGCCGCGCGGGGCCACCCGCGGGGCCGCGCAGGTCCCAGTGGAGCACGCGC
m5C	chr1:1511736(-)	BS-Seq (High)	Human	lnc-TMEM240-2	rs1165335646	chr1:1511736..1511736	dbSNP153			GCGGGAACCTCACCCGAGGCGGCACCGGCGCCCGGGCAAGCCGAGCCCTTCCGCGATGAGTCGGC	GCGGGAACCTCACCCGAGGCGGCACCGGCGCCTGGGCAAGCCGAGCCCTTCCGCGATGAGTCGGC
m5C	chr1:1703855(-)	BS-Seq (High)	Human	AL031282.2,CDK11A	rs757293035	chr1:1703855..1703855	dbSNP153	RBP 12 Splice 23 circRNA 2		GCTGACTCAGAAGCCTCTGTTCCCCGGGAATTCGGAAATCGATCAGATCAACAAAGTGTTCAAGG	GCTGACTCAGAAGCCTCTGTTCCCCGGGAATTTGGAAATCGATCAGATCAACAAAGTGTTCAAGG
m5C	chr1:1703855(-)	BS-Seq (High)	Human	AL031282.2,CDK11A	rs757293035	chr1:1703855..1703855	dbSNP153	RBP 12 Splice 23 circRNA 2		GCTGACTCAGAAGCCTCTGTTCCCCGGGAATTCGGAAATCGATCAGATCAACAAAGTGTTCAAGG	GCTGACTCAGAAGCCTCTGTTCCCCGGGAATTGGGAAATCGATCAGATCAACAAAGTGTTCAAGG
m5C	chr1:1703855(-)	BS-Seq (High)	Human	AL031282.2,CDK11A	rs757293035	chr1:1703855..1703855	dbSNP153	RBP 12 Splice 23 circRNA 2		GCTGACTCAGAAGCCTCTGTTCCCCGGGAATTCGGAAATCGATCAGATCAACAAAGTGTTCAAGG	GCTGACTCAGAAGCCTCTGTTCCCCGGGAATTAGGAAATCGATCAGATCAACAAAGTGTTCAAGG
m5C	chr1:7820535(-)	BS-Seq (High)	Human	Z98884.1	rs1307084466	chr1:7820535..7820535	dbSNP153			CATCGCCGTGGACAGGATCTGTGGAGCTCCTCCTCCTGTGTCTATGGACCGTCCATTTGTTGGCA	CATCGCCGTGGACAGGATCTGTGGAGCTCCTCTTCCTGTGTCTATGGACCGTCCATTTGTTGGCA
m5C	chr1:201464908(-)	BS-Seq (High)	Human	PHLDA3,AC096677.2	rs1215530952	chr1:201464908..201464908	dbSNP153			TGGGGGAGGCTGAGGCAGGAGAATTGCTTGAACCTGGGAGGCAGAGGTTACAGTGAGCTGAGATG	TGGGGGAGGCTGAGGCAGGAGAATTGCTTGAATCTGGGAGGCAGAGGTTACAGTGAGCTGAGATG
m5C	chr1:201464931(-)	BS-Seq (High)	Human	PHLDA3,AC096677.2	rs1369657311	chr1:201464931..201464931	dbSNP153			CACACACCTATAGCCCCAGCTACTGGGGGAGGCTGAGGCAGGAGAATTGCTTGAACCTGGGAGGC	CACACACCTATAGCCCCAGCTACTGGGGGAGGTTGAGGCAGGAGAATTGCTTGAACCTGGGAGGC
m5C	chr1:202013971(+)	BS-Seq (High)	Human	AL691482.4,ELF3	rs766167510	chr1:202013971..202013971	dbSNP153	RBP 1 Splice 4 circRNA 3		CTGCGCTCCGAGGCTGTGGCCCAACTATGGGGCCAAAAGAAAAAGAACAGCAACATGACCTACGA	CTGCGCTCCGAGGCTGTGGCCCAACTATGGGGTCAAAAGAAAAAGAACAGCAACATGACCTACGA
m5C	chr1:147270935(+)	BS-Seq (High)	Human	CHD1L,AC242426.2	rs782725787	chr1:147270935..147270935	dbSNP153	RBP 5 Splice 21 circRNA 18		GCAGTGTTTCCTTTTCTTTTTCTTGCCAGGGGCCATCGGGTTTTACTTTTCTCCCAAATGACCCA	GCAGTGTTTCCTTTTCTTTTTCTTGCCAGGGGTCATCGGGTTTTACTTTTCTCCCAAATGACCCA
m5C	chr1:147275387(+)	BS-Seq (High)	Human	CHD1L,AC242426.2	rs1437131416	chr1:147275387..147275387	dbSNP153	RBP 7 Splice 21 miRNA 16 circRNA 24		TGGAGTTGGCATGAACTTAACAGCAGCAGATACTGTGATTTTTGTTGACAGTGACTTTAATCCTC	TGGAGTTGGCATGAACTTAACAGCAGCAGATAGTGTGATTTTTGTTGACAGTGACTTTAATCCTC
m5C	chr1:32175533(+)	BS-Seq (High)	Human	KPNA6,AL049795.2	rs1443864850	chr1:32175533..32175533	dbSNP153	RBP 1 miRNA 22 circRNA 2		CTGGCCAGGCGCGGTGGCACATGCCTGTAATCCCAGCACTTTGGGAGGCCGAGGCGGGTGGATCA	CTGGCCAGGCGCGGTGGCACATGCCTGTAATCGCAGCACTTTGGGAGGCCGAGGCGGGTGGATCA
m5C	chr1:32175589(+)	BS-Seq (High)	Human	KPNA6,AL049795.2	rs1428382251	chr1:32175589..32175589	dbSNP153	RBP 1 miRNA 1 circRNA 2		GGTGGATCACGAGGTCAGGAGTTTGAGACCAGCCTGGCAACATAGTGAAACCCCATCTCTAATAA	GGTGGATCACGAGGTCAGGAGTTTGAGACCAGGCTGGCAACATAGTGAAACCCCATCTCTAATAA
m5C	chr1:32175643(+)	BS-Seq (High)	Human	KPNA6,AL049795.2	rs1005734534	chr1:32175638..32175644	dbSNP153	circRNA 2		ATCTCTAATAAAAATACAAAAAATTAGCTGGGCGTGGTGGCAGGCGCCTGTAATCCCAGCTACTT	ATCTCTAATAAAAATACAAAAAATTAGC______TGGTGGCAGGCGCCTGTAATCCCAGCTACTT
m5C	chr1:32175643(+)	BS-Seq (High)	Human	KPNA6,AL049795.2	rs1432304190	chr1:32175643..32175643	dbSNP153	circRNA 2		ATCTCTAATAAAAATACAAAAAATTAGCTGGGCGTGGTGGCAGGCGCCTGTAATCCCAGCTACTT	ATCTCTAATAAAAATACAAAAAATTAGCTGGGTGTGGTGGCAGGCGCCTGTAATCCCAGCTACTT
m5C	chr1:32175714(+)	BS-Seq (High)	Human	KPNA6,AL049795.2	rs973351959	chr1:32175714..32175714	dbSNP153	circRNA 2		CTGAGACAGGAGAATCACTTGAACCCAGGAGGCGGAGGTTGCAGTGAGCCAAGATCATGCCACTG	CTGAGACAGGAGAATCACTTGAACCCAGGAGGTGGAGGTTGCAGTGAGCCAAGATCATGCCACTG
m5C	chr1:150877078(+)	BS-Seq (High)	Human	lnc-CTXND2-8	rs995295794	chr1:150877078..150877078	dbSNP153			TGTGGCCAGGGGTTCGAAACCAGCCTGGCCAACATGGCGAAACCCCGTCTCTACTAAAAATACAA	TGTGGCCAGGGGTTCGAAACCAGCCTGGCCAAAATGGCGAAACCCCGTCTCTACTAAAAATACAA
m5C	chr1:150877078(+)	BS-Seq (High)	Human	lnc-CTXND2-8	rs995295794	chr1:150877078..150877078	dbSNP153			TGTGGCCAGGGGTTCGAAACCAGCCTGGCCAACATGGCGAAACCCCGTCTCTACTAAAAATACAA	TGTGGCCAGGGGTTCGAAACCAGCCTGGCCAATATGGCGAAACCCCGTCTCTACTAAAAATACAA
m5C	chr1:150877184(+)	BS-Seq (High)	Human	lnc-CTXND2-8	rs1279681372	chr1:150877184..150877184	dbSNP153			CTTGGGAGGCTGAGGCAGGAGAATCGCTTGAACCTGGGAGGCAGAGGTTGCAGTGAGCCGAGATA	CTTGGGAGGCTGAGGCAGGAGAATCGCTTGAATCTGGGAGGCAGAGGTTGCAGTGAGCCGAGATA
m5C	chr1:150877202(+)	BS-Seq (High)	Human	lnc-CTXND2-8	rs1226289932	chr1:150877202..150877202	dbSNP153			GAGAATCGCTTGAACCTGGGAGGCAGAGGTTGCAGTGAGCCGAGATAGCGCCACTGCACGCCAGT	GAGAATCGCTTGAACCTGGGAGGCAGAGGTTGTAGTGAGCCGAGATAGCGCCACTGCACGCCAGT
m5C	chr1:155054198(-)	BS-Seq (High)	Human	DCST1-AS1,DCST1-AS1:2,DCST1-AS1:3	rs769371744	chr1:155054198..155054198	dbSNP153			ATACCTGAGCCCAGAGCAGGTGCAGATGGACACCCAGGAGCCTGCATATCCCCGCACTCTTCCCT	ATACCTGAGCCCAGAGCAGGTGCAGATGGACATCCAGGAGCCTGCATATCCCCGCACTCTTCCCT
m5C	chr1:155057864(-)	BS-Seq (High)	Human	DCST1-AS1,DCST1-AS1:2,DCST1-AS1:3	rs917102665	chr1:155057864..155057864	dbSNP153			CACAATCCCCTCTGGTAGGACGACACTGCCAGCCAGACGGGCGCAGCTGTGGAGGGTGGATGAGC	CACAATCCCCTCTGGTAGGACGACACTGCCAGTCAGACGGGCGCAGCTGTGGAGGGTGGATGAGC
m5C	chr1:155199826(+)	BS-Seq (High)	Human	AC234582.1	rs1403958183	chr1:155199824..155199826	dbSNP153			AAGACCTTACCTGTCTTCATTAGTATCACAGACATCCCCCACCAGGTCGCTGTCTGCATCTGTCT	AAGACCTTACCTGTCTTCATTAGTATCACAG__ATCCCCCACCAGGTCGCTGTCTGCATCTGTCT
m5C	chr1:155204915(+)	BS-Seq (High)	Human	AC234582.1	rs1034346891	chr1:155204915..155204915	dbSNP153			GAATGGACACTCACTCAGGGCTCCTACCCGGGCCATGGACCCACCCAGAATAATTTTCATAGATT	GAATGGACACTCACTCAGGGCTCCTACCCGGGTCATGGACCCACCCAGAATAATTTTCATAGATT
m5C	chr1:155204922(+)	BS-Seq (High)	Human	AC234582.1	rs1320652042	chr1:155204922..155204922	dbSNP153			CACTCACTCAGGGCTCCTACCCGGGCCATGGACCCACCCAGAATAATTTTCATAGATTCCACAAA	CACTCACTCAGGGCTCCTACCCGGGCCATGGATCCACCCAGAATAATTTTCATAGATTCCACAAA
m5C	chr1:156652351(-)	BS-Seq (High)	Human	AL590666.2	rs377376223	chr1:156652351..156652351	dbSNP153	RBP 1		GCCTCATCCTCCACCTCCTCCTCTTCTTCTTCCTCCTCTTTCTCTTCTTCATCTTCATATTTCTC	GCCTCATCCTCCACCTCCTCCTCTTCTTCTTCTTCCTCTTTCTCTTCTTCATCTTCATATTTCTC
m5C	chr1:247332920(+)	BS-Seq (High)	Human	lnc-NLRP3-1,lnc-NLRP3-1:2,lnc-NLRP3-1:3,lnc-NLRP3-1:4,lnc-NLRP3-1:5	rs952924252	chr1:247332920..247332920	dbSNP153	RBP 1		CGATTTCCTTCGGATCCCCTTTCAAGGGCAAGCAGAAGGAAATCAGTTTCTCCAAAGAAAGTGGC	CGATTTCCTTCGGATCCCCTTTCAAGGGCAAGGAGAAGGAAATCAGTTTCTCCAAAGAAAGTGGC
m5C	chr1:99008479(+)	BS-Seq (High)	Human	AL445433.2	rs972378315	chr1:99008479..99008479	dbSNP153	RBP 1		CAGAGCTTAGGAGCGGGCTGCTGAGAGCCAAACCAAACAATTTTCTATGATGATTTTTCAGATAT	CAGAGCTTAGGAGCGGGCTGCTGAGAGCCAAATCAAACAATTTTCTATGATGATTTTTCAGATAT
m5C	chr1:84506152(-)	BS-Seq (High)	Human	GNG5,AL359762.3	rs1469213485	chr1:84506152..84506152	TCGA,ICGC,COSMIC	RBP 9 miRNA 6 circRNA 2		CGCCCCCGCCGCGCGCCGCTGAGTTGTCTGGCCCCGCCGACCCACGGCCCACGACCCACCGACCC	CGCCCCCGCCGCGCGCCGCTGAGTTGTCTGGCTCCGCCGACCCACGGCCCACGACCCACCGACCC
m5C	chr1:155199820(+)	BS-Seq (High)	Human	AC234582.1	-	chr1:155199819..155199821	TCGA,ICGC			TTGACCAAGACCTTACCTGTCTTCATTAGTATCACAGACATCCCCCACCAGGTCGCTGTCTGCAT	TTGACCAAGACCTTACCTGTCTTCATTAGTAT__CAGACATCCCCCACCAGGTCGCTGTCTGCAT
m5C	chr1:216196645(+)	BS-Seq (High)	Human	AC138024.1	-	chr1:216196645..216196645	TCGA	RBP 1		ATACCCCACAACTTTTCCTCTTGTAACATTATCTGCTGGCTTCTCCCAGGAGATATTGAGAGAGT	ATACCCCACAACTTTTCCTCTTGTAACATTATATGCTGGCTTCTCCCAGGAGATATTGAGAGAGT
m5C	chr1:155199820(+)	BS-Seq (High)	Human	AC234582.1	-	chr1:155199820..155199820	ICGC,COSMIC			TTGACCAAGACCTTACCTGTCTTCATTAGTATCACAGACATCCCCCACCAGGTCGCTGTCTGCAT	TTGACCAAGACCTTACCTGTCTTCATTAGTATGACAGACATCCCCCACCAGGTCGCTGTCTGCAT
m5C	chr1:64836139(+)	BS-Seq (High)	Human	lnc-AK4-1	-	chr1:64836139..64836139	ICGC			ACTAGAATCTGAATCACAGTAAGTCAGCAGCTCATGCAGAGTGACTCCAAAAGACCAGACGTCAG	ACTAGAATCTGAATCACAGTAAGTCAGCAGCTAATGCAGAGTGACTCCAAAAGACCAGACGTCAG
m5C	chr1:1703855(-)	BS-Seq (High)	Human	AL031282.2,CDK11A	rs757293035	chr1:1703855..1703855	ICGC	RBP 12 Splice 23 circRNA 2		GCTGACTCAGAAGCCTCTGTTCCCCGGGAATTCGGAAATCGATCAGATCAACAAAGTGTTCAAGG	GCTGACTCAGAAGCCTCTGTTCCCCGGGAATTAGGAAATCGATCAGATCAACAAAGTGTTCAAGG
m5C	chr1:1703855(-)	BS-Seq (High)	Human	AL031282.2,CDK11A	rs757293035	chr1:1703855..1703855	COSMIC	RBP 12 Splice 23 circRNA 2		GCTGACTCAGAAGCCTCTGTTCCCCGGGAATTCGGAAATCGATCAGATCAACAAAGTGTTCAAGG	GCTGACTCAGAAGCCTCTGTTCCCCGGGAATTTGGAAATCGATCAGATCAACAAAGTGTTCAAGG
m5C	chr1:155199826(+)	BS-Seq (High)	Human	AC234582.1	-	chr1:155199826..155199826	COSMIC			AAGACCTTACCTGTCTTCATTAGTATCACAGACATCCCCCACCAGGTCGCTGTCTGCATCTGTCT	AAGACCTTACCTGTCTTCATTAGTATCACAGATATCCCCCACCAGGTCGCTGTCTGCATCTGTCT
m5C	chr1:32175533(+)	BS-Seq (High)	Human	KPNA6,AL049795.2	-	chr1:32175533..32175533	ICGC	RBP 1 miRNA 22 circRNA 2		CTGGCCAGGCGCGGTGGCACATGCCTGTAATCCCAGCACTTTGGGAGGCCGAGGCGGGTGGATCA	CTGGCCAGGCGCGGTGGCACATGCCTGTAATCTCAGCACTTTGGGAGGCCGAGGCGGGTGGATCA
m5C	chr2:126557380(-)	BS-Seq (High)	Human	HSALNG0018571	rs562608769	chr2:126557380..126557380	dbSNP153			GTCTGCCTCATTCTAAAATTTACACAGTAGACCATTTGTCATCCATGCTGTCCCACAAATAGTTT	GTCTGCCTCATTCTAAAATTTACACAGTAGACTATTTGTCATCCATGCTGTCCCACAAATAGTTT
m5C	chr2:126558233(-)	BS-Seq (High)	Human	HSALNG0018571	rs1209866092	chr2:126558233..126558233	dbSNP153			TAGAGTCTCAGCCTCGCCGCTGCTGCCGCCGCCGCCCAGAGACTGCTGAGCCCCTGTTCGTCCAC	TAGAGTCTCAGCCTCGCCGCTGCTGCCGCCGCTGCCCAGAGACTGCTGAGCCCCTGTTCGTCCAC
m5C	chr2:126558234(-)	BS-Seq (High)	Human	HSALNG0018571	rs1270122900	chr2:126558234..126558234	dbSNP153			CTAGAGTCTCAGCCTCGCCGCTGCTGCCGCCGCCGCCCAGAGACTGCTGAGCCCCTGTTCGTCCA	CTAGAGTCTCAGCCTCGCCGCTGCTGCCGCCGTCGCCCAGAGACTGCTGAGCCCCTGTTCGTCCA
m5C	chr2:127634617(-)	BS-Seq (High)	Human	lnc-LIMS2-1	rs1228220933	chr2:127634617..127634617	dbSNP153			AGACACCTCCCTCAAGGAATCAAAGAAGAAGTCTCCCTCCTTCTGGCTGATGACCTGGGGAAGGG	AGACACCTCCCTCAAGGAATCAAAGAAGAAGTGTCCCTCCTTCTGGCTGATGACCTGGGGAAGGG
m5C	chr2:11641619(-)	BS-Seq (High)	Human	lnc-NTSR2-6	rs1450735139	chr2:11641619..11641619	dbSNP153			TAGCCGGGCGTGGTGGTGGGCGCCTGTAGTCCCAGCTACTCGGGAGGCTGAGGCAGGAGAATGGT	TAGCCGGGCGTGGTGGTGGGCGCCTGTAGTCCTAGCTACTCGGGAGGCTGAGGCAGGAGAATGGT
m5C	chr2:199459239(+)	BS-Seq (High)	Human	SATB2-AS1	rs1272309053	chr2:199459220..199459240	dbSNP153	RBP 1		CCAACAGAGCTGTGCCCTGAGGACCCGGCCTCCCCGCCCGGGGGGAGGCCGCACAGGAGCGTCCC	CCAACAGAGCTGTG____________________CGCCCGGGGGGAGGCCGCACAGGAGCGTCCC
m5C	chr2:199459240(+)	BS-Seq (High)	Human	SATB2-AS1	rs1272309053	chr2:199459220..199459240	dbSNP153	RBP 1		CAACAGAGCTGTGCCCTGAGGACCCGGCCTCCCCGCCCGGGGGGAGGCCGCACAGGAGCGTCCCC	CAACAGAGCTGTG____________________CGCCCGGGGGGAGGCCGCACAGGAGCGTCCCC
m5C	chr2:199459235(+)	BS-Seq (High)	Human	SATB2-AS1	rs1416947161	chr2:199459234..199459235	dbSNP153	RBP 1		GGCGCCAACAGAGCTGTGCCCTGAGGACCCGGCCTCCCCGCCCGGGGGGAGGCCGCACAGGAGCG	GGCGCCAACAGAGCTGTGCCCTGAGGACCCGG_CTCCCCGCCCGGGGGGAGGCCGCACAGGAGCG
m5C	chr2:206085410(+)	BS-Seq (High)	Human	AC007383.1	rs992514571	chr2:206085410..206085410	dbSNP153	RBP 1		CACTCCCCACTCCTAGGCCCTGACGCCCCTGTCCCGGCAGCCCGGGCCTGCCGCCCCGCGGGAAA	CACTCCCCACTCCTAGGCCCTGACGCCCCTGTACCGGCAGCCCGGGCCTGCCGCCCCGCGGGAAA
m5C	chr2:206085418(+)	BS-Seq (High)	Human	AC007383.1	rs1306699468	chr2:206085418..206085418	dbSNP153	RBP 1		ACTCCTAGGCCCTGACGCCCCTGTCCCGGCAGCCCGGGCCTGCCGCCCCGCGGGAAAGCCTCCGG	ACTCCTAGGCCCTGACGCCCCTGTCCCGGCAGTCCGGGCCTGCCGCCCCGCGGGAAAGCCTCCGG
m5C	chr2:24975772(+)	BS-Seq (High)	Human	DNAJC27-AS1	rs1180835033	chr2:24975772..24975772	dbSNP153			GCCTGTAATCCCAGCACTCTGGGAGGCCGAGGCGGGCGGATCACGAGGTCAGGAGATCGAGACCA	GCCTGTAATCCCAGCACTCTGGGAGGCCGAGGTGGGCGGATCACGAGGTCAGGAGATCGAGACCA
m5C	chr2:24975776(+)	BS-Seq (High)	Human	DNAJC27-AS1	rs139859138	chr2:24975776..24975776	dbSNP153			GTAATCCCAGCACTCTGGGAGGCCGAGGCGGGCGGATCACGAGGTCAGGAGATCGAGACCATTCT	GTAATCCCAGCACTCTGGGAGGCCGAGGCGGGTGGATCACGAGGTCAGGAGATCGAGACCATTCT
m5C	chr2:24975781(+)	BS-Seq (High)	Human	DNAJC27-AS1	rs1013666552	chr2:24975781..24975781	dbSNP153			CCCAGCACTCTGGGAGGCCGAGGCGGGCGGATCACGAGGTCAGGAGATCGAGACCATTCTGGCTA	CCCAGCACTCTGGGAGGCCGAGGCGGGCGGATTACGAGGTCAGGAGATCGAGACCATTCTGGCTA
m5C	chr2:24975983(+)	BS-Seq (High)	Human	DNAJC27-AS1	rs1214695776	chr2:24975983..24975983	dbSNP153			GAGATAGCACCACTGCACTCCAGCCTGGGTGACAGAGCGAGACTCCCTCTCAAAACAAAACAAAA	GAGATAGCACCACTGCACTCCAGCCTGGGTGATAGAGCGAGACTCCCTCTCAAAACAAAACAAAA
m5C	chr2:227261108(-)	BS-Seq (High)	Human	MFF-DT	rs776998364	chr2:227261107..227261108	dbSNP153	circRNA 2		TACCCCAAGAAACATGGACATACCAGGACTTCCAGGAACTCCGGGGGGACCACTGGGACCTGGGA	TACCCCAAGAAACATGGACATACCAGGACTTC_AGGAACTCCGGGGGGACCACTGGGACCTGGGA
m5C	chr2:227261108(-)	BS-Seq (High)	Human	MFF-DT	rs1559876538	chr2:227261108..227261108	dbSNP153	circRNA 2		TACCCCAAGAAACATGGACATACCAGGACTTCCAGGAACTCCGGGGGGACCACTGGGACCTGGGA	TACCCCAAGAAACATGGACATACCAGGACTTCGAGGAACTCCGGGGGGACCACTGGGACCTGGGA
m5C	chr2:233462695(-)	BS-Seq (High)	Human	lnc-USP40-2	rs778819654	chr2:233462695..233462695	dbSNP153			TCTTCCCAGACAGCAGCAGCTCCGTCTCACTGCGCAGAGCTCTGAAGTTATTCACCATTTCCAGG	TCTTCCCAGACAGCAGCAGCTCCGTCTCACTGTGCAGAGCTCTGAAGTTATTCACCATTTCCAGG
m5C	chr2:233462698(-)	BS-Seq (High)	Human	lnc-USP40-2	rs1458489731	chr2:233462698..233462698	dbSNP153			CCATCTTCCCAGACAGCAGCAGCTCCGTCTCACTGCGCAGAGCTCTGAAGTTATTCACCATTTCC	CCATCTTCCCAGACAGCAGCAGCTCCGTCTCAGTGCGCAGAGCTCTGAAGTTATTCACCATTTCC
m5C	chr2:174719803(+)	BS-Seq (High)	Human	AC010894.3	rs904343987	chr2:174719803..174719803	dbSNP153			TTTTTTACTAGTAGAAAATGTTGGTATAGGTTCGCAGCCGCCGCCGCGCCGCCGTCGCTCTCCAA	TTTTTTACTAGTAGAAAATGTTGGTATAGGTTTGCAGCCGCCGCCGCGCCGCCGTCGCTCTCCAA
m5C	chr2:174719817(+)	BS-Seq (High)	Human	AC010894.3	rs1403688129	chr2:174719817..174719817	dbSNP153			AAAATGTTGGTATAGGTTCGCAGCCGCCGCCGCGCCGCCGTCGCTCTCCAACGCCAGCGCCGCCT	AAAATGTTGGTATAGGTTCGCAGCCGCCGCCGTGCCGCCGTCGCTCTCCAACGCCAGCGCCGCCT
m5C	chr2:176136795(-)	m5C-RIP-seq (High)	Human	HOXD-AS2	rs1380563275	chr2:176136794..176136795	dbSNP153			GCGGTGTCGGCGCCGGCGGGGGACTCGGCGCCCAGGGCCCCTTCCAGGCCCTCCCTCGCCGGGCT	GCGGTGTCGGCGCCGGCGGGGGACTCGGCGCC_AGGGCCCCTTCCAGGCCCTCCCTCGCCGGGCT
m5C	chr2:176136795(-)	m5C-RIP-seq (High)	Human	HOXD-AS2	rs890732282	chr2:176136795..176136795	dbSNP153			GCGGTGTCGGCGCCGGCGGGGGACTCGGCGCCCAGGGCCCCTTCCAGGCCCTCCCTCGCCGGGCT	GCGGTGTCGGCGCCGGCGGGGGACTCGGCGCCTAGGGCCCCTTCCAGGCCCTCCCTCGCCGGGCT
m5C	chr2:178729846(+)	BS-Seq (High)	Human	TTN-AS1	rs117551279	chr2:178729846..178729846	dbSNP153,HGVD		Clinvar_Rec_947	TTATTTCATTCCCGTCTAGATACCAAGACACTCGGATTTTAGGAGTGCCTGTTATTTGGCATTCA	TTATTTCATTCCCGTCTAGATACCAAGACACTTGGATTTTAGGAGTGCCTGTTATTTGGCATTCA
m5C	chr2:85539027(-)	BS-Seq (High)	Human	PARTICL	rs752703865	chr2:85539027..85539027	dbSNP153			GGGGGAGGAAGGGCAGCTCGCCCCGCGGAGTCCGGGCTGAACCACACTGCGCGGCCGCGGGAGGT	GGGGGAGGAAGGGCAGCTCGCCCCGCGGAGTCTGGGCTGAACCACACTGCGCGGCCGCGGGAGGT
m5C	chr2:65206023(+)	BS-Seq (High)	Human	lnc-ACTR2-11	rs891983348	chr2:65206023..65206023	dbSNP153			TCCAGCTGAAAGAAACCTTTGGGAATGGATATCAGAAGATTTGGCCTTAATATATTTCCATTGTG	TCCAGCTGAAAGAAACCTTTGGGAATGGATATTAGAAGATTTGGCCTTAATATATTTCCATTGTG
m5C	chr2:65601475(-)	BS-Seq (High)	Human	AC007389.3	rs1375914539	chr2:65601475..65601475	dbSNP153			ACCTCCACCTCCCAGCTGCCTGCCTTGGCCCCCCAAAGTGCCGAGATTGCAGCCTCTGCCTGGCC	ACCTCCACCTCCCAGCTGCCTGCCTTGGCCCCGCAAAGTGCCGAGATTGCAGCCTCTGCCTGGCC
m5C	chr2:65601475(-)	BS-Seq (High)	Human	AC007389.3	rs1375914539	chr2:65601475..65601475	dbSNP153			ACCTCCACCTCCCAGCTGCCTGCCTTGGCCCCCCAAAGTGCCGAGATTGCAGCCTCTGCCTGGCC	ACCTCCACCTCCCAGCTGCCTGCCTTGGCCCCACAAAGTGCCGAGATTGCAGCCTCTGCCTGGCC
m5C	chr2:65601479(-)	BS-Seq (High)	Human	AC007389.3	rs1325864428	chr2:65601479..65601479	dbSNP153			TACAACCTCCACCTCCCAGCTGCCTGCCTTGGCCCCCCAAAGTGCCGAGATTGCAGCCTCTGCCT	TACAACCTCCACCTCCCAGCTGCCTGCCTTGGTCCCCCAAAGTGCCGAGATTGCAGCCTCTGCCT
m5C	chr2:65601488(-)	BS-Seq (High)	Human	AC007389.3	rs570290801	chr2:65601488..65601488	dbSNP153			TCGGCTCGCTACAACCTCCACCTCCCAGCTGCCTGCCTTGGCCCCCCAAAGTGCCGAGATTGCAG	TCGGCTCGCTACAACCTCCACCTCCCAGCTGCTTGCCTTGGCCCCCCAAAGTGCCGAGATTGCAG
m5C	chr2:126557380(-)	BS-Seq (High)	Human	HSALNG0018571	rs562608769	chr2:126557380..126557380	ICGC			GTCTGCCTCATTCTAAAATTTACACAGTAGACCATTTGTCATCCATGCTGTCCCACAAATAGTTT	GTCTGCCTCATTCTAAAATTTACACAGTAGACTATTTGTCATCCATGCTGTCCCACAAATAGTTT
m5C	chr2:127634617(-)	BS-Seq (High)	Human	lnc-LIMS2-1	-	chr2:127634617..127634617	TCGA,ICGC			AGACACCTCCCTCAAGGAATCAAAGAAGAAGTCTCCCTCCTTCTGGCTGATGACCTGGGGAAGGG	AGACACCTCCCTCAAGGAATCAAAGAAGAAGTTTCCCTCCTTCTGGCTGATGACCTGGGGAAGGG
m5C	chr2:233462698(-)	BS-Seq (High)	Human	lnc-USP40-2	-	chr2:233462698..233462698	COSMIC			CCATCTTCCCAGACAGCAGCAGCTCCGTCTCACTGCGCAGAGCTCTGAAGTTATTCACCATTTCC	CCATCTTCCCAGACAGCAGCAGCTCCGTCTCATTGCGCAGAGCTCTGAAGTTATTCACCATTTCC
m5C	chr2:127634654(-)	BS-Seq (High)	Human	lnc-LIMS2-1	-	chr2:127634654..127634654	ICGC,COSMIC			CACCTTCTTTCTGGGGCTTGTTCTTCTTCACCCAGTCAGACACCTCCCTCAAGGAATCAAAGAAG	CACCTTCTTTCTGGGGCTTGTTCTTCTTCACCAAGTCAGACACCTCCCTCAAGGAATCAAAGAAG
m5C	chr2:233462695(-)	BS-Seq (High)	Human	lnc-USP40-2	rs778819654	chr2:233462695..233462695	TCGA,ICGC,COSMIC			TCTTCCCAGACAGCAGCAGCTCCGTCTCACTGCGCAGAGCTCTGAAGTTATTCACCATTTCCAGG	TCTTCCCAGACAGCAGCAGCTCCGTCTCACTGTGCAGAGCTCTGAAGTTATTCACCATTTCCAGG
m5C	chr2:227305083(-)	BS-Seq (High)	Human	MFF-DT	-	chr2:227305083..227305083	ICGC			TTCTTCGGTGAGGAAACAAGCTGGGGGTTTACCTGGCTCTCCTTTAGAACCTTTGTTGCCTTTTT	TTCTTCGGTGAGGAAACAAGCTGGGGGTTTACATGGCTCTCCTTTAGAACCTTTGTTGCCTTTTT
m5C	chr3:4814509(-)	BS-Seq (High)	Human	AC018816.1	rs1553757628	chr3:4814509..4814509	dbSNP153		Clinvar_Rec_753	TACATCTCCTACTCCACCCCCGCTCCGCAGCCCGTGACTCAGCACAGTGACAATGCACATCAGCA	TACATCTCCTACTCCACCCCCGCTCCGCAGCCTGTGACTCAGCACAGTGACAATGCACATCAGCA
m5C	chr3:6773345(-)	BS-Seq (High)	Human	GRM7-AS3	rs777271134	chr3:6773345..6773345	dbSNP153			CAAGACTGGAAACTGCCCCTTCTCAGGGGTGACGATTGGCAGCAAGATGGCGTCTGCCAGTAGGG	CAAGACTGGAAACTGCCCCTTCTCAGGGGTGATGATTGGCAGCAAGATGGCGTCTGCCAGTAGGG
m5C	chr3:6773345(-)	BS-Seq (High)	Human	GRM7-AS3	rs777271134	chr3:6773345..6773345	dbSNP153			CAAGACTGGAAACTGCCCCTTCTCAGGGGTGACGATTGGCAGCAAGATGGCGTCTGCCAGTAGGG	CAAGACTGGAAACTGCCCCTTCTCAGGGGTGAGGATTGGCAGCAAGATGGCGTCTGCCAGTAGGG
m5C	chr3:9931640(-)	BS-Seq (High)	Human	lnc-PRRT3-3,lnc-PRRT3-3:2,lnc-PRRT3-3:3	rs1453971398	chr3:9931640..9931640	dbSNP153			TAGCAGGGCATGGTGGCAGGCGCCTATTAATCCCAGCTACCCGGGAGGCTGAGGTAGAGAATTGC	TAGCAGGGCATGGTGGCAGGCGCCTATTAATCGCAGCTACCCGGGAGGCTGAGGTAGAGAATTGC
m5C	chr3:9933058(-)	BS-Seq (High)	Human	lnc-PRRT3-3,lnc-PRRT3-3:2,lnc-PRRT3-3:3	rs1447568508	chr3:9933040..9933059	dbSNP153			GTTCACGACGGCTCCACAGGTCTACGGCCACGCGCAGCGGCAGCTGGCACAGGGCCGACGCCAGG	GTTCACGACGGCTCCACAGGTCTACGGCCAC___________________AGGGCCGACGCCAGG
m5C	chr3:9933056(-)	BS-Seq (High)	Human	lnc-PRRT3-3,lnc-PRRT3-3:2,lnc-PRRT3-3:3	rs759393049	chr3:9933055..9933057	dbSNP153			TCACGACGGCTCCACAGGTCTACGGCCACGCGCAGCGGCAGCTGGCACAGGGCCGACGCCAGGGC	TCACGACGGCTCCACAGGTCTACGGCCACGC__AGCGGCAGCTGGCACAGGGCCGACGCCAGGGC
m5C	chr3:9933056(-)	BS-Seq (High)	Human	lnc-PRRT3-3,lnc-PRRT3-3:2,lnc-PRRT3-3:3	rs1318881863	chr3:9933056..9933056	dbSNP153			TCACGACGGCTCCACAGGTCTACGGCCACGCGCAGCGGCAGCTGGCACAGGGCCGACGCCAGGGC	TCACGACGGCTCCACAGGTCTACGGCCACGCGTAGCGGCAGCTGGCACAGGGCCGACGCCAGGGC
m5C	chr3:9933058(-)	BS-Seq (High)	Human	lnc-PRRT3-3,lnc-PRRT3-3:2,lnc-PRRT3-3:3	rs776236793	chr3:9933058..9933058	dbSNP153			GTTCACGACGGCTCCACAGGTCTACGGCCACGCGCAGCGGCAGCTGGCACAGGGCCGACGCCAGG	GTTCACGACGGCTCCACAGGTCTACGGCCACGTGCAGCGGCAGCTGGCACAGGGCCGACGCCAGG
m5C	chr3:9933058(-)	BS-Seq (High)	Human	lnc-PRRT3-3,lnc-PRRT3-3:2,lnc-PRRT3-3:3	rs776236793	chr3:9933058..9933058	dbSNP153			GTTCACGACGGCTCCACAGGTCTACGGCCACGCGCAGCGGCAGCTGGCACAGGGCCGACGCCAGG	GTTCACGACGGCTCCACAGGTCTACGGCCACGAGCAGCGGCAGCTGGCACAGGGCCGACGCCAGG
m5C	chr3:9933125(-)	BS-Seq (High)	Human	lnc-PRRT3-3,lnc-PRRT3-3:2,lnc-PRRT3-3:3	rs76999397	chr3:9933125..9933125	dbSNP153,HGVD			ACGCCGCCCTCCTGCAGGGTCTGGCGCCGCTGCGCGTGAAACCAAGCCACGGGCCCCTGCGCGCT	ACGCCGCCCTCCTGCAGGGTCTGGCGCCGCTGTGCGTGAAACCAAGCCACGGGCCCCTGCGCGCT
m5C	chr3:9933125(-)	BS-Seq (High)	Human	lnc-PRRT3-3,lnc-PRRT3-3:2,lnc-PRRT3-3:3	rs76999397	chr3:9933125..9933125	dbSNP153			ACGCCGCCCTCCTGCAGGGTCTGGCGCCGCTGCGCGTGAAACCAAGCCACGGGCCCCTGCGCGCT	ACGCCGCCCTCCTGCAGGGTCTGGCGCCGCTGGGCGTGAAACCAAGCCACGGGCCCCTGCGCGCT
m5C	chr3:9933128(-)	BS-Seq (High)	Human	lnc-PRRT3-3,lnc-PRRT3-3:2,lnc-PRRT3-3:3	rs1183028616	chr3:9933128..9933128	dbSNP153			ACCACGCCGCCCTCCTGCAGGGTCTGGCGCCGCTGCGCGTGAAACCAAGCCACGGGCCCCTGCGC	ACCACGCCGCCCTCCTGCAGGGTCTGGCGCCGGTGCGCGTGAAACCAAGCCACGGGCCCCTGCGC
m5C	chr3:9933130(-)	BS-Seq (High)	Human	lnc-PRRT3-3,lnc-PRRT3-3:2,lnc-PRRT3-3:3	rs1418096457	chr3:9933130..9933130	dbSNP153			CCACCACGCCGCCCTCCTGCAGGGTCTGGCGCCGCTGCGCGTGAAACCAAGCCACGGGCCCCTGC	CCACCACGCCGCCCTCCTGCAGGGTCTGGCGCTGCTGCGCGTGAAACCAAGCCACGGGCCCCTGC
m5C	chr3:11206233(-)	BS-Seq (High)	Human	AC083855.2	rs1159774387	chr3:11206233..11206233	dbSNP153			TGTGCCTGTAGTCCCGGCTACTCCTCGGGAGGCTGAGGCAGGAGAATCACTTGAACCTGGGAGGC	TGTGCCTGTAGTCCCGGCTACTCCTCGGGAGGTTGAGGCAGGAGAATCACTTGAACCTGGGAGGC
m5C	chr3:11225828(-)	BS-Seq (High)	Human	AC083855.2	rs1038952508	chr3:11225828..11225828	dbSNP153			AGCTGGGTTGTGGTCGGGTGCGGTGGCTCATGCCTGTAATCCCAGCACTTGGGAGACTGAGGCAT	AGCTGGGTTGTGGTCGGGTGCGGTGGCTCATGTCTGTAATCCCAGCACTTGGGAGACTGAGGCAT
m5C	chr3:11225828(-)	BS-Seq (High)	Human	AC083855.2	rs1038952508	chr3:11225828..11225828	dbSNP153			AGCTGGGTTGTGGTCGGGTGCGGTGGCTCATGCCTGTAATCCCAGCACTTGGGAGACTGAGGCAT	AGCTGGGTTGTGGTCGGGTGCGGTGGCTCATGACTGTAATCCCAGCACTTGGGAGACTGAGGCAT
m5C	chr3:11225846(-)	BS-Seq (High)	Human	AC083855.2	rs1017406368	chr3:11225846..11225846	dbSNP153			CAATTACAACCCTTATAAAGCTGGGTTGTGGTCGGGTGCGGTGGCTCATGCCTGTAATCCCAGCA	CAATTACAACCCTTATAAAGCTGGGTTGTGGTTGGGTGCGGTGGCTCATGCCTGTAATCCCAGCA
m5C	chr3:14944634(-)	BS-Seq (High)	Human	FGD5-AS1	rs1454850619	chr3:14944634..14944634	dbSNP153	RBP 4		TGTGTTGACCAGGCTGGTCTCGAACTCCTGGCCTCAAGTGATCCTCCCATCTTGGCCTCCCAAAG	TGTGTTGACCAGGCTGGTCTCGAACTCCTGGCTTCAAGTGATCCTCCCATCTTGGCCTCCCAAAG
m5C	chr3:14944635(-)	BS-Seq (High)	Human	FGD5-AS1	rs1466234266	chr3:14944635..14944635	dbSNP153	RBP 4		CTGTGTTGACCAGGCTGGTCTCGAACTCCTGGCCTCAAGTGATCCTCCCATCTTGGCCTCCCAAA	CTGTGTTGACCAGGCTGGTCTCGAACTCCTGGTCTCAAGTGATCCTCCCATCTTGGCCTCCCAAA
m5C	chr3:14944639(-)	BS-Seq (High)	Human	FGD5-AS1	rs1052331902	chr3:14944639..14944639	dbSNP153	RBP 4		CTCGCTGTGTTGACCAGGCTGGTCTCGAACTCCTGGCCTCAAGTGATCCTCCCATCTTGGCCTCC	CTCGCTGTGTTGACCAGGCTGGTCTCGAACTCTTGGCCTCAAGTGATCCTCCCATCTTGGCCTCC
m5C	chr3:14944640(-)	BS-Seq (High)	Human	FGD5-AS1	rs1364776404	chr3:14944640..14944640	dbSNP153	RBP 4		TCTCGCTGTGTTGACCAGGCTGGTCTCGAACTCCTGGCCTCAAGTGATCCTCCCATCTTGGCCTC	TCTCGCTGTGTTGACCAGGCTGGTCTCGAACTTCTGGCCTCAAGTGATCCTCCCATCTTGGCCTC
m5C	chr3:14944642(-)	BS-Seq (High)	Human	FGD5-AS1	rs893455555	chr3:14944642..14944642	dbSNP153	RBP 5		GGTCTCGCTGTGTTGACCAGGCTGGTCTCGAACTCCTGGCCTCAAGTGATCCTCCCATCTTGGCC	GGTCTCGCTGTGTTGACCAGGCTGGTCTCGAAGTCCTGGCCTCAAGTGATCCTCCCATCTTGGCC
m5C	chr3:14944884(-)	BS-Seq (High)	Human	FGD5-AS1	rs781093299	chr3:14944884..14944884	dbSNP153	RBP 1 circRNA 2		TGGATCACCTGAGGTCAGGAGTTCAAGACCAGCCTGACTAACATGGTAAAACCCCATCTCTACTA	TGGATCACCTGAGGTCAGGAGTTCAAGACCAGTCTGACTAACATGGTAAAACCCCATCTCTACTA
m5C	chr3:14944893(-)	BS-Seq (High)	Human	FGD5-AS1	rs569872247	chr3:14944893..14944893	dbSNP153	RBP 1 circRNA 2		TGAGGTGGGTGGATCACCTGAGGTCAGGAGTTCAAGACCAGCCTGACTAACATGGTAAAACCCCA	TGAGGTGGGTGGATCACCTGAGGTCAGGAGTTGAAGACCAGCCTGACTAACATGGTAAAACCCCA
m5C	chr3:14944893(-)	BS-Seq (High)	Human	FGD5-AS1	rs569872247	chr3:14944893..14944893	dbSNP153	RBP 1 circRNA 2		TGAGGTGGGTGGATCACCTGAGGTCAGGAGTTCAAGACCAGCCTGACTAACATGGTAAAACCCCA	TGAGGTGGGTGGATCACCTGAGGTCAGGAGTTAAAGACCAGCCTGACTAACATGGTAAAACCCCA
m5C	chr3:14944901(-)	BS-Seq (High)	Human	FGD5-AS1	rs529213907	chr3:14944901..14944901	dbSNP153	RBP 2 circRNA 2		TGGGAAGGTGAGGTGGGTGGATCACCTGAGGTCAGGAGTTCAAGACCAGCCTGACTAACATGGTA	TGGGAAGGTGAGGTGGGTGGATCACCTGAGGTGAGGAGTTCAAGACCAGCCTGACTAACATGGTA
m5C	chr3:14944909(-)	BS-Seq (High)	Human	FGD5-AS1	rs956531934	chr3:14944909..14944909	dbSNP153	RBP 2 circRNA 2		CAGCATTTTGGGAAGGTGAGGTGGGTGGATCACCTGAGGTCAGGAGTTCAAGACCAGCCTGACTA	CAGCATTTTGGGAAGGTGAGGTGGGTGGATCATCTGAGGTCAGGAGTTCAAGACCAGCCTGACTA
m5C	chr3:14944909(-)	BS-Seq (High)	Human	FGD5-AS1	rs956531934	chr3:14944909..14944909	dbSNP153	RBP 2 circRNA 2		CAGCATTTTGGGAAGGTGAGGTGGGTGGATCACCTGAGGTCAGGAGTTCAAGACCAGCCTGACTA	CAGCATTTTGGGAAGGTGAGGTGGGTGGATCAACTGAGGTCAGGAGTTCAAGACCAGCCTGACTA
m5C	chr3:14944942(-)	BS-Seq (High)	Human	FGD5-AS1	rs1401723779	chr3:14944942..14944942	dbSNP153	RBP 5 circRNA 2		TTGGCCGGGCATGGTGGCTCATGCCTGTAATCCCAGCATTTTGGGAAGGTGAGGTGGGTGGATCA	TTGGCCGGGCATGGTGGCTCATGCCTGTAATCGCAGCATTTTGGGAAGGTGAGGTGGGTGGATCA
m5C	chr3:75214598(+)	BS-Seq (High)	Human	AC117481.1	rs777260309	chr3:75214592..75214598	dbSNP153	RBP 6		CGCCCAGTCGCCCCCAGCCCGACTCCGGCCGTCGCCGTCGCCGCCGGGGGGAGGAGGGCCATGAT	CGCCCAGTCGCCCCCAGCCCGACTCCG______GCCGTCGCCGCCGGGGGGAGGAGGGCCATGAT
m5C	chr3:75214594(+)	BS-Seq (High)	Human	AC117481.1	rs553537851	chr3:75214594..75214594	dbSNP153	RBP 4		CCGCCGCCCAGTCGCCCCCAGCCCGACTCCGGCCGTCGCCGTCGCCGCCGGGGGGAGGAGGGCCA	CCGCCGCCCAGTCGCCCCCAGCCCGACTCCGGACGTCGCCGTCGCCGCCGGGGGGAGGAGGGCCA
m5C	chr3:75214598(+)	BS-Seq (High)	Human	AC117481.1	rs752328973	chr3:75214598..75214598	dbSNP153	RBP 6		CGCCCAGTCGCCCCCAGCCCGACTCCGGCCGTCGCCGTCGCCGCCGGGGGGAGGAGGGCCATGAT	CGCCCAGTCGCCCCCAGCCCGACTCCGGCCGTGGCCGTCGCCGCCGGGGGGAGGAGGGCCATGAT
m5C	chr3:75214598(+)	BS-Seq (High)	Human	AC117481.1	rs752328973	chr3:75214598..75214598	dbSNP153	RBP 6		CGCCCAGTCGCCCCCAGCCCGACTCCGGCCGTCGCCGTCGCCGCCGGGGGGAGGAGGGCCATGAT	CGCCCAGTCGCCCCCAGCCCGACTCCGGCCGTTGCCGTCGCCGCCGGGGGGAGGAGGGCCATGAT
m5C	chr3:75214600(+)	BS-Seq (High)	Human	AC117481.1	rs1559573778	chr3:75214599..75214600	dbSNP153	RBP 5		CCCAGTCGCCCCCAGCCCGACTCCGGCCGTCGCCGTCGCCGCCGGGGGGAGGAGGGCCATGATCC	CCCAGTCGCCCCCAGCCCGACTCCGGCCGTCG_CGTCGCCGCCGGGGGGAGGAGGGCCATGATCC
m5C	chr3:75214604(+)	BS-Seq (High)	Human	AC117481.1	rs1342578764	chr3:75214604..75214604	dbSNP153	RBP 5		GTCGCCCCCAGCCCGACTCCGGCCGTCGCCGTCGCCGCCGGGGGGAGGAGGGCCATGATCCAAAG	GTCGCCCCCAGCCCGACTCCGGCCGTCGCCGTTGCCGCCGGGGGGAGGAGGGCCATGATCCAAAG
m5C	chr3:169764738(-)	BS-Seq (High)	Human	TERC,AC078802.2	rs199422281	chr3:169764738..169764738	dbSNP153	RBP 10	Clinvar_Rec_885	TGCCACCGCGAAGAGTTGGGCTCTGTCAGCCGCGGGTCTCTCGGGGGCGAGGGCGAGGTTCAGGC	TGCCACCGCGAAGAGTTGGGCTCTGTCAGCCGTGGGTCTCTCGGGGGCGAGGGCGAGGTTCAGGC
m5C	chr3:169764850(-)	BS-Seq (High)	Human	TERC,AC078802.2	rs1346505603	chr3:169764850..169764850	dbSNP153	RBP 23		TCAGCTGCTGGCCCGTTCGCCCCTCCCGGGGACCTGCGGCGGGTCGCCTGCCCAGCCCCCGAACC	TCAGCTGCTGGCCCGTTCGCCCCTCCCGGGGATCTGCGGCGGGTCGCCTGCCCAGCCCCCGAACC
m5C	chr3:51971716(-)	BS-Seq (High)	Human	PCBP4,ABHD14B,AC115284.1	rs78583983	chr3:51971716..51971716	dbSNP153	RBP 2		CCTGGGCAGGGTGTTCTGTGGCCCCTCATCATCGTGGTTTTGAACCACAGGCCCTTCACCAGCAC	CCTGGGCAGGGTGTTCTGTGGCCCCTCATCATTGTGGTTTTGAACCACAGGCCCTTCACCAGCAC
m5C	chr3:51971716(-)	BS-Seq (High)	Human	PCBP4,ABHD14B,AC115284.1	rs78583983	chr3:51971716..51971716	dbSNP153	RBP 2		CCTGGGCAGGGTGTTCTGTGGCCCCTCATCATCGTGGTTTTGAACCACAGGCCCTTCACCAGCAC	CCTGGGCAGGGTGTTCTGTGGCCCCTCATCATGGTGGTTTTGAACCACAGGCCCTTCACCAGCAC
m5C	chr3:134250574(+)	BS-Seq (High)	Human	lnc-CEP63-4	rs1322312931	chr3:134250574..134250574	dbSNP153			AGCGGCAACAGCGCAAGCAGAAGCAGCAGCGGCGGCGGCGGCGGGGCCCTCAGGCCGCGGGCCCC	AGCGGCAACAGCGCAAGCAGAAGCAGCAGCGGTGGCGGCGGCGGGGCCCTCAGGCCGCGGGCCCC
m5C	chr3:134250577(+)	BS-Seq (High)	Human	lnc-CEP63-4	rs1245605014	chr3:134250577..134250577	dbSNP153			GGCAACAGCGCAAGCAGAAGCAGCAGCGGCGGCGGCGGCGGGGCCCTCAGGCCGCGGGCCCCCGG	GGCAACAGCGCAAGCAGAAGCAGCAGCGGCGGAGGCGGCGGGGCCCTCAGGCCGCGGGCCCCCGG
m5C	chr3:134250577(+)	BS-Seq (High)	Human	lnc-CEP63-4	rs1245605014	chr3:134250577..134250577	dbSNP153			GGCAACAGCGCAAGCAGAAGCAGCAGCGGCGGCGGCGGCGGGGCCCTCAGGCCGCGGGCCCCCGG	GGCAACAGCGCAAGCAGAAGCAGCAGCGGCGGTGGCGGCGGGGCCCTCAGGCCGCGGGCCCCCGG
m5C	chr3:134250583(+)	BS-Seq (High)	Human	lnc-CEP63-4	rs550024418	chr3:134250583..134250583	dbSNP153			AGCGCAAGCAGAAGCAGCAGCGGCGGCGGCGGCGGGGCCCTCAGGCCGCGGGCCCCCGGGAGGCA	AGCGCAAGCAGAAGCAGCAGCGGCGGCGGCGGGGGGGCCCTCAGGCCGCGGGCCCCCGGGAGGCA
m5C	chr3:40761829(+)	BS-Seq (High)	Human	AC099560.1	rs1398120043	chr3:40761829..40761829	dbSNP153			TAAAAGCACTCTGAGTCAAGATGAGTGGGAAACCATCTCAATAAACACATTTTGGATTAAAAAAA	TAAAAGCACTCTGAGTCAAGATGAGTGGGAAAACATCTCAATAAACACATTTTGGATTAAAAAAA
m5C	chr3:42013742(+)	BS-Seq (High)	Human	lnc-TRAK1-1	rs1419887060	chr3:42013740..42013743	dbSNP153	RBP 1		CGCCCCCGCCCGCCGCCCCGGGGCCCACCCGGCCGCCGCCCCCGCGCGCCCCGAGCCCTTGACGC	CGCCCCCGCCCGCCGCCCCGGGGCCCACCCG___GCCGCCCCCGCGCGCCCCGAGCCCTTGACGC
m5C	chr3:42013748(+)	BS-Seq (High)	Human	lnc-TRAK1-1	rs1186484924	chr3:42013747..42013748	dbSNP153			CGCCCGCCGCCCCGGGGCCCACCCGGCCGCCGCCCCCGCGCGCCCCGAGCCCTTGACGCCCGCGC	CGCCCGCCGCCCCGGGGCCCACCCGGCCGCCG_CCCCGCGCGCCCCGAGCCCTTGACGCCCGCGC
m5C	chr3:101676698(+)	BS-Seq (High)	Human	ZBTB11-AS1	rs746380859	chr3:101676698..101676698	dbSNP153			GCCGGGACCCAGGTGCGCCGCCTCGATGAGGTCCCGGCGTCGCTCCGGCTGCAGCACCACCTCCA	GCCGGGACCCAGGTGCGCCGCCTCGATGAGGTTCCGGCGTCGCTCCGGCTGCAGCACCACCTCCA
m5C	chr3:9933125(-)	BS-Seq (High)	Human	lnc-PRRT3-3,lnc-PRRT3-3:2,lnc-PRRT3-3:3	rs76999397	chr3:9933125..9933125	ICGC			ACGCCGCCCTCCTGCAGGGTCTGGCGCCGCTGCGCGTGAAACCAAGCCACGGGCCCCTGCGCGCT	ACGCCGCCCTCCTGCAGGGTCTGGCGCCGCTGTGCGTGAAACCAAGCCACGGGCCCCTGCGCGCT
m5C	chr3:4814509(-)	BS-Seq (High)	Human	AC018816.1	-	chr3:4814509..4814509	ICGC			TACATCTCCTACTCCACCCCCGCTCCGCAGCCCGTGACTCAGCACAGTGACAATGCACATCAGCA	TACATCTCCTACTCCACCCCCGCTCCGCAGCCAGTGACTCAGCACAGTGACAATGCACATCAGCA
m5C	chr4:1252232(+)	BS-Seq (High)	Human	CTBP1-DT	rs563964472	chr4:1252232..1252232	dbSNP153	RBP 1		CCGGATTCAAGCAATTCTCCTGTCTCAGCCTCCCGAGTAGCTGGAATTGCAGACACCCATCACCA	CCGGATTCAAGCAATTCTCCTGTCTCAGCCTCTCGAGTAGCTGGAATTGCAGACACCCATCACCA
m5C	chr4:2941289(+)	m5C-RIP-seq (High)	Human	NOP14-AS1	rs1294539016	chr4:2941289..2941289	dbSNP153			AGCGCGGCTCAGAGCTGACTGTCCAGGCCTGGCAGGGGCTGACCCCTGGGCGCTGGTGCACCCTC	AGCGCGGCTCAGAGCTGACTGTCCAGGCCTGGGAGGGGCTGACCCCTGGGCGCTGGTGCACCCTC
m5C	chr5:442290(-)	BS-Seq (High)	Human	EXOC3-AS1	rs1437480154	chr5:442290..442290	dbSNP153	RBP 1		TAGGTTGGAGCTGCTAGGTTGTGCCCCTGCCCCTCCTGAAAATTAGCCACACGAAAGGAAGGGTC	TAGGTTGGAGCTGCTAGGTTGTGCCCCTGCCCTTCCTGAAAATTAGCCACACGAAAGGAAGGGTC
m5C	chr5:442292(-)	BS-Seq (High)	Human	EXOC3-AS1	rs192190441	chr5:442292..442292	dbSNP153	RBP 1		CATAGGTTGGAGCTGCTAGGTTGTGCCCCTGCCCCTCCTGAAAATTAGCCACACGAAAGGAAGGG	CATAGGTTGGAGCTGCTAGGTTGTGCCCCTGCTCCTCCTGAAAATTAGCCACACGAAAGGAAGGG
m5C	chr5:442296(-)	BS-Seq (High)	Human	EXOC3-AS1	rs1425143138	chr5:442296..442296	dbSNP153	RBP 1		CTTTCATAGGTTGGAGCTGCTAGGTTGTGCCCCTGCCCCTCCTGAAAATTAGCCACACGAAAGGA	CTTTCATAGGTTGGAGCTGCTAGGTTGTGCCCGTGCCCCTCCTGAAAATTAGCCACACGAAAGGA
m5C	chr5:442299(-)	BS-Seq (High)	Human	EXOC3-AS1	rs965067839	chr5:442299..442299	dbSNP153			AGTCTTTCATAGGTTGGAGCTGCTAGGTTGTGCCCCTGCCCCTCCTGAAAATTAGCCACACGAAA	AGTCTTTCATAGGTTGGAGCTGCTAGGTTGTGGCCCTGCCCCTCCTGAAAATTAGCCACACGAAA
m5C	chr5:472743(-)	BS-Seq (High)	Human	AC010442.1,SLC9A3	rs1344130307	chr5:472719..472743	dbSNP153	RBP 3 Splice 4		ACTCAGGGCCCGACCTGCAGCGGCTGCAGGCCCAGCGCCCGCAAGCGGCCTGGGCCGAGCGCCGT	ACTCAGGGCCCGACCTGCAGCGGCTGCAGGCC________________________GAGCGCCGT
m5C	chr5:472720(-)	BS-Seq (High)	Human	AC010442.1,SLC9A3	rs1204867837	chr5:472720..472720	dbSNP153	RBP 2 Splice 4		CTGCAGGCCCAGCGCCCGCAAGCGGCCTGGGCCGAGCGCCGTTTCCAGGCCCTCGCCAGGTCTTT	CTGCAGGCCCAGCGCCCGCAAGCGGCCTGGGCTGAGCGCCGTTTCCAGGCCCTCGCCAGGTCTTT
m5C	chr5:472736(-)	BS-Seq (High)	Human	AC010442.1,SLC9A3	rs1188553986	chr5:472736..472736	dbSNP153	RBP 3 Splice 4		GCCCGACCTGCAGCGGCTGCAGGCCCAGCGCCCGCAAGCGGCCTGGGCCGAGCGCCGTTTCCAGG	GCCCGACCTGCAGCGGCTGCAGGCCCAGCGCCGGCAAGCGGCCTGGGCCGAGCGCCGTTTCCAGG
m5C	chr5:472738(-)	BS-Seq (High)	Human	AC010442.1,SLC9A3	rs969230935	chr5:472738..472738	dbSNP153	RBP 3 Splice 4		GGGCCCGACCTGCAGCGGCTGCAGGCCCAGCGCCCGCAAGCGGCCTGGGCCGAGCGCCGTTTCCA	GGGCCCGACCTGCAGCGGCTGCAGGCCCAGCGTCCGCAAGCGGCCTGGGCCGAGCGCCGTTTCCA
m5C	chr5:472743(-)	BS-Seq (High)	Human	AC010442.1,SLC9A3	rs1367555689	chr5:472743..472743	dbSNP153	RBP 3 Splice 4		ACTCAGGGCCCGACCTGCAGCGGCTGCAGGCCCAGCGCCCGCAAGCGGCCTGGGCCGAGCGCCGT	ACTCAGGGCCCGACCTGCAGCGGCTGCAGGCCTAGCGCCCGCAAGCGGCCTGGGCCGAGCGCCGT
m5C	chr5:472744(-)	BS-Seq (High)	Human	AC010442.1,SLC9A3	rs1228126484	chr5:472744..472744	dbSNP153	RBP 3 Splice 4		GACTCAGGGCCCGACCTGCAGCGGCTGCAGGCCCAGCGCCCGCAAGCGGCCTGGGCCGAGCGCCG	GACTCAGGGCCCGACCTGCAGCGGCTGCAGGCGCAGCGCCCGCAAGCGGCCTGGGCCGAGCGCCG
m5C	chr5:676443(+)	BS-Seq (High)	Human	AC026740.1	rs1359521861	chr5:676443..676443	dbSNP153			GGTGGGCCCCACAGCCTTCCACACAGGGGCATCTGACCCACGGCCCGGCCCCTTGCAAAGCCAAG	GGTGGGCCCCACAGCCTTCCACACAGGGGCATTTGACCCACGGCCCGGCCCCTTGCAAAGCCAAG
m5C	chr5:1598806(-)	BS-Seq (High)	Human	lnc-LPCAT1-4-002,lnc-LPCAT1-4-002:2,lnc-LPCAT1-4-002:3,lnc-LPCAT1-4-002:4,lnc-LPCAT1-4-002:5,lnc-LPCAT1-4-002:6,lnc-LPCAT1-4-002:7,lnc-LPCAT1-4-002:8,lnc-LPCAT1-4-002:9	rs186410644	chr5:1598806..1598806	dbSNP153	RBP 1		CTCCCAGGCTCCACTGATCTTCCCACCTCAGCCTCCTGAGTAGCTGGGACTACAGGTGTGCACCG	CTCCCAGGCTCCACTGATCTTCCCACCTCAGCGTCCTGAGTAGCTGGGACTACAGGTGTGCACCG
m5C	chr5:1598810(-)	BS-Seq (High)	Human	lnc-LPCAT1-4-002,lnc-LPCAT1-4-002:2,lnc-LPCAT1-4-002:3,lnc-LPCAT1-4-002:4,lnc-LPCAT1-4-002:5,lnc-LPCAT1-4-002:6,lnc-LPCAT1-4-002:7,lnc-LPCAT1-4-002:8,lnc-LPCAT1-4-002:9	rs1329928839	chr5:1598810..1598810	dbSNP153			CGACCTCCCAGGCTCCACTGATCTTCCCACCTCAGCCTCCTGAGTAGCTGGGACTACAGGTGTGC	CGACCTCCCAGGCTCCACTGATCTTCCCACCTTAGCCTCCTGAGTAGCTGGGACTACAGGTGTGC
m5C	chr5:178055902(+)	BS-Seq (High)	Human	AC136632.1,FAM153CP	rs749606067	chr5:178055902..178055902	dbSNP153	RBP 2		GCCAGAGAAGGTCACATGGATGAGGAGAATGACGATTTTGCGCCGGCTGCTCAGAAGATACCGTG	GCCAGAGAAGGTCACATGGATGAGGAGAATGAGGATTTTGCGCCGGCTGCTCAGAAGATACCGTG
m5C	chr5:178055902(+)	BS-Seq (High)	Human	AC136632.1,FAM153CP	rs749606067	chr5:178055902..178055902	dbSNP153	RBP 2		GCCAGAGAAGGTCACATGGATGAGGAGAATGACGATTTTGCGCCGGCTGCTCAGAAGATACCGTG	GCCAGAGAAGGTCACATGGATGAGGAGAATGATGATTTTGCGCCGGCTGCTCAGAAGATACCGTG
m5C	chr5:91313656(-)	BS-Seq (High)	Human	LUCAT1	rs536900131	chr5:91313656..91313656	dbSNP153	Splice 21 circRNA 4		GCCTCAGCCTCCTGAGTAGCTGGGACTACAGGCGCCCGCCACCACACCCAGGTAATTTTTTGCAT	GCCTCAGCCTCCTGAGTAGCTGGGACTACAGGTGCCCGCCACCACACCCAGGTAATTTTTTGCAT
m5C	chr5:91313656(-)	BS-Seq (High)	Human	LUCAT1	rs536900131	chr5:91313656..91313656	dbSNP153	Splice 21 circRNA 4		GCCTCAGCCTCCTGAGTAGCTGGGACTACAGGCGCCCGCCACCACACCCAGGTAATTTTTTGCAT	GCCTCAGCCTCCTGAGTAGCTGGGACTACAGGGGCCCGCCACCACACCCAGGTAATTTTTTGCAT
m5C	chr5:91313663(-)	BS-Seq (High)	Human	LUCAT1	rs533470353	chr5:91313663..91313663	dbSNP153	Splice 21 circRNA 4		TTCTCCTGCCTCAGCCTCCTGAGTAGCTGGGACTACAGGCGCCCGCCACCACACCCAGGTAATTT	TTCTCCTGCCTCAGCCTCCTGAGTAGCTGGGATTACAGGCGCCCGCCACCACACCCAGGTAATTT
m5C	chr5:91313677(-)	BS-Seq (High)	Human	LUCAT1	rs1316007284	chr5:91313677..91313677	dbSNP153	Splice 21 circRNA 4		CCGGGTTCACGCCATTCTCCTGCCTCAGCCTCCTGAGTAGCTGGGACTACAGGCGCCCGCCACCA	CCGGGTTCACGCCATTCTCCTGCCTCAGCCTCTTGAGTAGCTGGGACTACAGGCGCCCGCCACCA
m5C	chr5:91313687(-)	BS-Seq (High)	Human	LUCAT1	rs1219623357	chr5:91313687..91313687	dbSNP153	Splice 21 circRNA 4		GCTCCACCTCCCGGGTTCACGCCATTCTCCTGCCTCAGCCTCCTGAGTAGCTGGGACTACAGGCG	GCTCCACCTCCCGGGTTCACGCCATTCTCCTGACTCAGCCTCCTGAGTAGCTGGGACTACAGGCG
m5C	chr5:32174696(+)	BS-Seq (High)	Human	AC025181.2	rs1267363026	chr5:32174696..32174696	dbSNP153			CGTCTTCGGAGGCGACTCCGCGGTCGTGTGGACGGGGTCCCATTTGGACTCCGGGGTCTGCAGGA	CGTCTTCGGAGGCGACTCCGCGGTCGTGTGGATGGGGTCCCATTTGGACTCCGGGGTCTGCAGGA
m5C	chr5:38556988(+)	BS-Seq (High)	Human	LIFR-AS1	rs992508369	chr5:38556988..38556988	dbSNP153	RBP 1		TGCGCGACGGCTCTGCGGGGAGGACCGCGCCTCCCCGAATGCGGCCGCTGCTGCCGCTGCAAACA	TGCGCGACGGCTCTGCGGGGAGGACCGCGCCTTCCCGAATGCGGCCGCTGCTGCCGCTGCAAACA
m5C	chr5:38556989(+)	BS-Seq (High)	Human	LIFR-AS1	rs1176707676	chr5:38556989..38556989	dbSNP153	RBP 1		GCGCGACGGCTCTGCGGGGAGGACCGCGCCTCCCCGAATGCGGCCGCTGCTGCCGCTGCAAACAG	GCGCGACGGCTCTGCGGGGAGGACCGCGCCTCGCCGAATGCGGCCGCTGCTGCCGCTGCAAACAG
m5C	chr5:38556989(+)	BS-Seq (High)	Human	LIFR-AS1	rs1176707676	chr5:38556989..38556989	dbSNP153	RBP 1		GCGCGACGGCTCTGCGGGGAGGACCGCGCCTCCCCGAATGCGGCCGCTGCTGCCGCTGCAAACAG	GCGCGACGGCTCTGCGGGGAGGACCGCGCCTCTCCGAATGCGGCCGCTGCTGCCGCTGCAAACAG
m5C	chr5:42992679(-)	BS-Seq (High)	Human	AC008875.3	rs937738802	chr5:42992679..42992679	dbSNP153			TGGAGGAGCGGCGGGCTCCCCTAGCCCAGCGCCGCCGCCGCCGCCCGGGAACGCCAGGCTCACCC	TGGAGGAGCGGCGGGCTCCCCTAGCCCAGCGCTGCCGCCGCCGCCCGGGAACGCCAGGCTCACCC
m5C	chr5:42992758(-)	BS-Seq (High)	Human	AC008875.3	rs1169811276	chr5:42992758..42992758	dbSNP153			CTGGAGGTCGAGCTGTTCTGCGGGTTCTGCGGCGGCGCTGGGAAGAGACGGCGCCCGGGCAGCTC	CTGGAGGTCGAGCTGTTCTGCGGGTTCTGCGGGGGCGCTGGGAAGAGACGGCGCCCGGGCAGCTC
m5C	chr5:43018715(-)	BS-Seq (High)	Human	AC025171.1	rs1360335858	chr5:43018715..43018715	dbSNP153			AGGAGCTGGGACTACAGGGACCCGCCACCACGCCCGGCTAATTTTTTTGTATTTTTAGTAGAGAC	AGGAGCTGGGACTACAGGGACCCGCCACCACGTCCGGCTAATTTTTTTGTATTTTTAGTAGAGAC
m5C	chr5:43018717(-)	BS-Seq (High)	Human	AC025171.1	rs776012636	chr5:43018717..43018717	dbSNP153			CGAGGAGCTGGGACTACAGGGACCCGCCACCACGCCCGGCTAATTTTTTTGTATTTTTAGTAGAG	CGAGGAGCTGGGACTACAGGGACCCGCCACCATGCCCGGCTAATTTTTTTGTATTTTTAGTAGAG
m5C	chr5:43018717(-)	BS-Seq (High)	Human	AC025171.1	rs776012636	chr5:43018717..43018717	dbSNP153			CGAGGAGCTGGGACTACAGGGACCCGCCACCACGCCCGGCTAATTTTTTTGTATTTTTAGTAGAG	CGAGGAGCTGGGACTACAGGGACCCGCCACCAAGCCCGGCTAATTTTTTTGTATTTTTAGTAGAG
m5C	chr5:43018719(-)	BS-Seq (High)	Human	AC025171.1	rs182370564	chr5:43018719..43018719	dbSNP153			CCCGAGGAGCTGGGACTACAGGGACCCGCCACCACGCCCGGCTAATTTTTTTGTATTTTTAGTAG	CCCGAGGAGCTGGGACTACAGGGACCCGCCACTACGCCCGGCTAATTTTTTTGTATTTTTAGTAG
m5C	chr5:43018719(-)	BS-Seq (High)	Human	AC025171.1	rs182370564	chr5:43018719..43018719	dbSNP153			CCCGAGGAGCTGGGACTACAGGGACCCGCCACCACGCCCGGCTAATTTTTTTGTATTTTTAGTAG	CCCGAGGAGCTGGGACTACAGGGACCCGCCACAACGCCCGGCTAATTTTTTTGTATTTTTAGTAG
m5C	chr5:43018720(-)	BS-Seq (High)	Human	AC025171.1	rs1371891969	chr5:43018720..43018720	dbSNP153			TCCCGAGGAGCTGGGACTACAGGGACCCGCCACCACGCCCGGCTAATTTTTTTGTATTTTTAGTA	TCCCGAGGAGCTGGGACTACAGGGACCCGCCAACACGCCCGGCTAATTTTTTTGTATTTTTAGTA
m5C	chr5:43018722(-)	BS-Seq (High)	Human	AC025171.1	rs1295771243	chr5:43018722..43018722	dbSNP153			CCTCCCGAGGAGCTGGGACTACAGGGACCCGCCACCACGCCCGGCTAATTTTTTTGTATTTTTAG	CCTCCCGAGGAGCTGGGACTACAGGGACCCGCTACCACGCCCGGCTAATTTTTTTGTATTTTTAG
m5C	chr5:43575780(-)	BS-Seq (High)	Human	NNT-AS1	rs1021795057	chr5:43575780..43575780	dbSNP153			CATTTGAGGTCAGGAGTTCGAGACCAGGCTGGCCAACATGGTGAAACCCCATCTCTACTAAAAAT	CATTTGAGGTCAGGAGTTCGAGACCAGGCTGGACAACATGGTGAAACCCCATCTCTACTAAAAAT
m5C	chr5:43575788(-)	BS-Seq (High)	Human	NNT-AS1	rs1364980953	chr5:43575788..43575788	dbSNP153			AGATGGATCATTTGAGGTCAGGAGTTCGAGACCAGGCTGGCCAACATGGTGAAACCCCATCTCTA	AGATGGATCATTTGAGGTCAGGAGTTCGAGACGAGGCTGGCCAACATGGTGAAACCCCATCTCTA
m5C	chr5:80483075(-)	BS-Seq (High)	Human	AC008771.1	rs1017828030	chr5:80483075..80483075	dbSNP153	RBP 1 Splice 2		CACCTGAGGTCAGGAGTTTGAGACCATCCTGACCAACATGGTGAAACTCGTCTCTACTACAAACA	CACCTGAGGTCAGGAGTTTGAGACCATCCTGAACAACATGGTGAAACTCGTCTCTACTACAAACA
m5C	chr5:80483084(-)	BS-Seq (High)	Human	AC008771.1	rs1418543797	chr5:80483084..80483084	dbSNP153	RBP 1 Splice 2 miRNA 1		CAGGCAGATCACCTGAGGTCAGGAGTTTGAGACCATCCTGACCAACATGGTGAAACTCGTCTCTA	CAGGCAGATCACCTGAGGTCAGGAGTTTGAGAACATCCTGACCAACATGGTGAAACTCGTCTCTA
m5C	chr5:80483132(-)	BS-Seq (High)	Human	AC008771.1	rs1272739945	chr5:80483132..80483132	dbSNP153	Splice 2 miRNA 22		AGGTATGGTGGCTCATGCCTCTAATCTCAGCACTTTGGGAGGCCGAAGCAGGCAGATCACCTGAG	AGGTATGGTGGCTCATGCCTCTAATCTCAGCAATTTGGGAGGCCGAAGCAGGCAGATCACCTGAG
m5C	chr5:112160882(+)	BS-Seq (High)	Human	EPB41L4A-AS1	rs866671475	chr5:112160882..112160882	dbSNP153	RBP 8 miRNA 1		GGACGGAAGCCTGTCCTTTCTTCCTTTTGGTGCGAGCTTGCTGTGGTTTTTGCTCTGGGTCCTCT	GGACGGAAGCCTGTCCTTTCTTCCTTTTGGTGGGAGCTTGCTGTGGTTTTTGCTCTGGGTCCTCT
m5C	chr5:112160882(+)	BS-Seq (High)	Human	EPB41L4A-AS1	rs866671475	chr5:112160882..112160882	dbSNP153	RBP 8 miRNA 1		GGACGGAAGCCTGTCCTTTCTTCCTTTTGGTGCGAGCTTGCTGTGGTTTTTGCTCTGGGTCCTCT	GGACGGAAGCCTGTCCTTTCTTCCTTTTGGTGTGAGCTTGCTGTGGTTTTTGCTCTGGGTCCTCT
m5C	chr5:112161135(+)	BS-Seq (High)	Human	EPB41L4A-AS1	rs1429188668	chr5:112161135..112161135	dbSNP153	RBP 6 miRNA 4		TGTGTTTACATCATCGACTATGCCAGGGAGTTCTCCAGATAAGCCTGGTTTTATTTTCGTCAGTG	TGTGTTTACATCATCGACTATGCCAGGGAGTTATCCAGATAAGCCTGGTTTTATTTTCGTCAGTG
m5C	chr5:55944649(+)	BS-Seq (High)	Human	lnc-IL31RA-2,RF00017-4495	rs368447098	chr5:55944649..55944649	dbSNP153	RBP 2		TCTCGGCCTTAGCGCCATTTTTTTGGAAACCTCGGCGCCATGAGAGCCAAGTGGAGGAAGAAGCG	TCTCGGCCTTAGCGCCATTTTTTTGGAAACCTAGGCGCCATGAGAGCCAAGTGGAGGAAGAAGCG
m5C	chr5:55944649(+)	BS-Seq (High)	Human	lnc-IL31RA-2,RF00017-4495	rs368447098	chr5:55944649..55944649	dbSNP153	RBP 2		TCTCGGCCTTAGCGCCATTTTTTTGGAAACCTCGGCGCCATGAGAGCCAAGTGGAGGAAGAAGCG	TCTCGGCCTTAGCGCCATTTTTTTGGAAACCTTGGCGCCATGAGAGCCAAGTGGAGGAAGAAGCG
m5C	chr5:180830758(-)	BS-Seq (High)	Human	HEIH	rs1376397918	chr5:180830758..180830758	dbSNP153	RBP 1 miRNA 5		CCTCTTCCCTGTGGCAAGCTGCTGAAGGAGACCTGCTGTTACTGCTTTAGCTGCTGTTCTGCTTA	CCTCTTCCCTGTGGCAAGCTGCTGAAGGAGACGTGCTGTTACTGCTTTAGCTGCTGTTCTGCTTA
m5C	chr5:121305820(+)	miCLIP (High)	Human	AC008568.1	rs747054084	chr5:121305816..121305820	dbSNP153			GCATAGCGGTGATATACAACTTCCTCCTTTCTCTATACCCCTAAAAAAAAAAAAAAAAAACAAAC	GCATAGCGGTGATATACAACTTCCTCCTT____TATACCCCTAAAAAAAAAAAAAAAAAACAAAC
m5C	chr5:127940575(-)	BS-Seq (High)	Human	LINC01184	rs551511392	chr5:127940575..127940575	dbSNP153			CGTGGTGGCAGGCGCCTGTAGTCCCAGCTACTCGGGAGGCTGAGGCAGGAGAATGGCGTGAACCC	CGTGGTGGCAGGCGCCTGTAGTCCCAGCTACTTGGGAGGCTGAGGCAGGAGAATGGCGTGAACCC
m5C	chr5:128082087(-)	BS-Seq (High)	Human	LINC01184	rs999110858	chr5:128082087..128082087	dbSNP153	RBP 1		CCAAGTGCTGGGATTACAGGCATGAGCCACCGCGCCCGGCCCTTGTATTTTTAAACTTTGACTTT	CCAAGTGCTGGGATTACAGGCATGAGCCACCGTGCCCGGCCCTTGTATTTTTAAACTTTGACTTT
m5C	chr5:128082099(-)	BS-Seq (High)	Human	LINC01184	rs1165219750	chr5:128082099..128082099	dbSNP153	Splice 4		ACCTCCGCCTCTCCAAGTGCTGGGATTACAGGCATGAGCCACCGCGCCCGGCCCTTGTATTTTTA	ACCTCCGCCTCTCCAAGTGCTGGGATTACAGGTATGAGCCACCGCGCCCGGCCCTTGTATTTTTA
m5C	chr5:132887961(+)	BS-Seq (High)	Human	NONHSAG041542.2	rs779638240	chr5:132887961..132887961	dbSNP153			AATGAAAGATACCACAGCATCAAGATAGTATACAGCTTTCTCAAACCTATCAGACTGAAGAAAGG	AATGAAAGATACCACAGCATCAAGATAGTATATAGCTTTCTCAAACCTATCAGACTGAAGAAAGG
m5C	chr5:132892163(+)	BS-Seq (High)	Human	NONHSAG041542.2,NONHSAG041543.2	rs1381375783	chr5:132892163..132892163	dbSNP153			ATTTTCAAAAGCCCCAGGCCCCCAACACTTTACCTTAACCTCCTTGGAGCTACTGGAAGTCTTCC	ATTTTCAAAAGCCCCAGGCCCCCAACACTTTATCTTAACCTCCTTGGAGCTACTGGAAGTCTTCC
m5C	chr5:134226089(-)	BS-Seq (High)	Human	AC104109.4	rs1561449198	chr5:134226089..134226089	dbSNP153	RBP 4		CGCCTCCTGACGCCGGGCGTGACGTCACCACGCCCGGCGGCCGCCATTACAGAGAGCCGAGCTCT	CGCCTCCTGACGCCGGGCGTGACGTCACCACGTCCGGCGGCCGCCATTACAGAGAGCCGAGCTCT
m5C	chr5:134226104(-)	BS-Seq (High)	Human	AC104109.4	rs1161712502	chr5:134226104..134226104	dbSNP153	RBP 2		CCCTCCGCTCCCCGCCGCCTCCTGACGCCGGGCGTGACGTCACCACGCCCGGCGGCCGCCATTAC	CCCTCCGCTCCCCGCCGCCTCCTGACGCCGGGGGTGACGTCACCACGCCCGGCGGCCGCCATTAC
m5C	chr5:134459969(+)	miCLIP (High)	Human	AC005355.1	rs1240976613	chr5:134459968..134459969	dbSNP153			TCCAGCCTGGTCAACAGAGTGAGACCCTGTCTCAAAAAAAAAAAAAAAAAAAACGGGAAGGGGGC	TCCAGCCTGGTCAACAGAGTGAGACCCTGTCT_AAAAAAAAAAAAAAAAAAAACGGGAAGGGGGC
m5C	chr5:134459969(+)	miCLIP (High)	Human	AC005355.1	rs1009491771	chr5:134459969..134459969	dbSNP153			TCCAGCCTGGTCAACAGAGTGAGACCCTGTCTCAAAAAAAAAAAAAAAAAAAACGGGAAGGGGGC	TCCAGCCTGGTCAACAGAGTGAGACCCTGTCTAAAAAAAAAAAAAAAAAAAAACGGGAAGGGGGC
m5C	chr5:139274760(+)	BS-Seq (High)	Human	MATR3,SNHG4	rs927101436	chr5:139274760..139274760	dbSNP153	circRNA 4		AGAAGAAGACCATCCTGGCCAACATGGTGAAACCCCGTCTCTACTAAAAATACAAAACTTAGCTG	AGAAGAAGACCATCCTGGCCAACATGGTGAAAACCCGTCTCTACTAAAAATACAAAACTTAGCTG
m5C	chr5:140564413(-)	m5C-RIP-seq (High)	Human	AC116353.5,APBB3	rs1561876770	chr5:140564412..140564413	dbSNP153			CCTGGGCGGGCTGTGCGGCTCAGGCCCTCCCCCGGGACCGGCCCGTGTCCCGCCCCGTGTCCCGC	CCTGGGCGGGCTGTGCGGCTCAGGCCCTCCCC_GGGACCGGCCCGTGTCCCGCCCCGTGTCCCGC
m5C	chr5:140564413(-)	m5C-RIP-seq (High)	Human	AC116353.5,APBB3	rs1013445991	chr5:140564413..140564413	dbSNP153			CCTGGGCGGGCTGTGCGGCTCAGGCCCTCCCCCGGGACCGGCCCGTGTCCCGCCCCGTGTCCCGC	CCTGGGCGGGCTGTGCGGCTCAGGCCCTCCCCTGGGACCGGCCCGTGTCCCGCCCCGTGTCCCGC
m5C	chr5:143333524(+)	BS-Seq (High)	Human	lnc-ARHGAP26-8	rs1448105415	chr5:143333524..143333524	dbSNP153			GGGCGCGGTGGCTCACGCCTGTAATCCCAGCACTTTGGGAGGCCAAGGCGGGCAGACCATGAGGT	GGGCGCGGTGGCTCACGCCTGTAATCCCAGCATTTTGGGAGGCCAAGGCGGGCAGACCATGAGGT
m5C	chr5:143333540(+)	BS-Seq (High)	Human	lnc-ARHGAP26-8	rs1314985503	chr5:143333540..143333540	dbSNP153			GCCTGTAATCCCAGCACTTTGGGAGGCCAAGGCGGGCAGACCATGAGGTCAGGAGATTGAGACCA	GCCTGTAATCCCAGCACTTTGGGAGGCCAAGGTGGGCAGACCATGAGGTCAGGAGATTGAGACCA
m5C	chr5:472736(-)	BS-Seq (High)	Human	AC010442.1,SLC9A3	-	chr5:472736..472736	ICGC	RBP 3 Splice 4		GCCCGACCTGCAGCGGCTGCAGGCCCAGCGCCCGCAAGCGGCCTGGGCCGAGCGCCGTTTCCAGG	GCCCGACCTGCAGCGGCTGCAGGCCCAGCGCCTGCAAGCGGCCTGGGCCGAGCGCCGTTTCCAGG
m5C	chr5:178055902(+)	BS-Seq (High)	Human	AC136632.1,FAM153CP	rs749606067	chr5:178055902..178055902	ICGC	RBP 2		GCCAGAGAAGGTCACATGGATGAGGAGAATGACGATTTTGCGCCGGCTGCTCAGAAGATACCGTG	GCCAGAGAAGGTCACATGGATGAGGAGAATGAGGATTTTGCGCCGGCTGCTCAGAAGATACCGTG
m5C	chr5:134206137(-)	BS-Seq (High)	Human	PPP2CA,AC104109.4,AC104109.3	-	chr5:134206137..134206137	ICGC	RBP 5		GCCAAATGTATTGCCTTATTTTTGTCTCCCATCTGTAGGCTAAAGAAATCCTGACAAAAGAATCC	GCCAAATGTATTGCCTTATTTTTGTCTCCCATATGTAGGCTAAAGAAATCCTGACAAAAGAATCC
m5C	chr5:472726(-)	BS-Seq (High)	Human	AC010442.1,SLC9A3	-	chr5:472726..472726	ICGC	RBP 3 Splice 4		CAGCGGCTGCAGGCCCAGCGCCCGCAAGCGGCCTGGGCCGAGCGCCGTTTCCAGGCCCTCGCCAG	CAGCGGCTGCAGGCCCAGCGCCCGCAAGCGGCATGGGCCGAGCGCCGTTTCCAGGCCCTCGCCAG
m5C	chr6:3752668(+)	BS-Seq (High)	Human	AL391422.4	rs369649673	chr6:3752668..3752668	dbSNP153			CAGGGTGAGCCCCTCACCTCACCCCGCCCCCGCCCCGGCAGCGCTCTGGAAAGCCTCAAAGCCCA	CAGGGTGAGCCCCTCACCTCACCCCGCCCCCGGCCCGGCAGCGCTCTGGAAAGCCTCAAAGCCCA
m5C	chr6:15244809(-)	BS-Seq (High)	Human	AL136162.1	rs1451565275	chr6:15244808..15244809	dbSNP153			GGGGGTCGCCGAGTGGAAAGGCCACGCCCCCCCACGCCCGGGCTCGGCACGCTGCCCCTGGGTCG	GGGGGTCGCCGAGTGGAAAGGCCACGCCCCCC_ACGCCCGGGCTCGGCACGCTGCCCCTGGGTCG
m5C	chr6:26286572(+)	miCLIP (High)	Human	tRNA-iMet-CAT-1-1,TRX-CAT1-1,lnc-HIST1H2BI-2,lnc-HIST1H2BI-2:2,lnc-HIST1H2BI-2:3,lnc-HIST1H2BI-2:4,piR-33543	rs768668633	chr6:26286572..26286572	dbSNP153	RBP 14		GCGGAAGCGTGCTGGGCCCATAACCCAGAGGTCGATGGATCGAAACCATCCTCTGCTAGGTCCTT	GCGGAAGCGTGCTGGGCCCATAACCCAGAGGTGGATGGATCGAAACCATCCTCTGCTAGGTCCTT
m5C	chr6:26286572(+)	miCLIP (High)	Human	tRNA-iMet-CAT-1-1,TRX-CAT1-1,lnc-HIST1H2BI-2,lnc-HIST1H2BI-2:2,lnc-HIST1H2BI-2:3,lnc-HIST1H2BI-2:4,piR-33543	rs768668633	chr6:26286572..26286572	dbSNP153	RBP 14		GCGGAAGCGTGCTGGGCCCATAACCCAGAGGTCGATGGATCGAAACCATCCTCTGCTAGGTCCTT	GCGGAAGCGTGCTGGGCCCATAACCCAGAGGTTGATGGATCGAAACCATCCTCTGCTAGGTCCTT
m5C	chr6:26286585(+)	miCLIP (High)	Human	tRNA-iMet-CAT-1-1,TRX-CAT1-1,lnc-HIST1H2BI-2,lnc-HIST1H2BI-2:2,lnc-HIST1H2BI-2:3,lnc-HIST1H2BI-2:4	rs1282709415	chr6:26286585..26286585	dbSNP153	RBP 10		GGGCCCATAACCCAGAGGTCGATGGATCGAAACCATCCTCTGCTAGGTCCTTTTTTTTTCTCCCC	GGGCCCATAACCCAGAGGTCGATGGATCGAAATCATCCTCTGCTAGGTCCTTTTTTTTTCTCCCC
m5C	chr6:26330313(-)	miCLIP (High)	Human	AL021917.1	rs1012180453	chr6:26330313..26330313	dbSNP153	RBP 8		GGGCCCATAACCCAGAGGTCGATGGATCGAAACCATCCTCTGCTAGGGAGCGTTTTGTGGATTTG	GGGCCCATAACCCAGAGGTCGATGGATCGAAATCATCCTCTGCTAGGGAGCGTTTTGTGGATTTG
m5C	chr6:26330313(-)	miCLIP (High)	Human	AL021917.1	rs1012180453	chr6:26330313..26330313	dbSNP153	RBP 8		GGGCCCATAACCCAGAGGTCGATGGATCGAAACCATCCTCTGCTAGGGAGCGTTTTGTGGATTTG	GGGCCCATAACCCAGAGGTCGATGGATCGAAAGCATCCTCTGCTAGGGAGCGTTTTGTGGATTTG
m5C	chr6:26330318(-)	miCLIP (High)	Human	AL021917.1	rs892908585	chr6:26330318..26330318	dbSNP153	RBP 10		GTGCTGGGCCCATAACCCAGAGGTCGATGGATCGAAACCATCCTCTGCTAGGGAGCGTTTTGTGG	GTGCTGGGCCCATAACCCAGAGGTCGATGGATTGAAACCATCCTCTGCTAGGGAGCGTTTTGTGG
m5C	chr6:26330318(-)	miCLIP (High)	Human	AL021917.1	rs892908585	chr6:26330318..26330318	dbSNP153	RBP 10		GTGCTGGGCCCATAACCCAGAGGTCGATGGATCGAAACCATCCTCTGCTAGGGAGCGTTTTGTGG	GTGCTGGGCCCATAACCCAGAGGTCGATGGATGGAAACCATCCTCTGCTAGGGAGCGTTTTGTGG
m5C	chr6:26330318(-)	miCLIP (High)	Human	AL021917.1	rs892908585	chr6:26330318..26330318	dbSNP153	RBP 10		GTGCTGGGCCCATAACCCAGAGGTCGATGGATCGAAACCATCCTCTGCTAGGGAGCGTTTTGTGG	GTGCTGGGCCCATAACCCAGAGGTCGATGGATAGAAACCATCCTCTGCTAGGGAGCGTTTTGTGG
m5C	chr6:26330326(-)	miCLIP (High)	Human	AL021917.1	rs542567620	chr6:26330326..26330326	dbSNP153	RBP 10		GCGGAAGCGTGCTGGGCCCATAACCCAGAGGTCGATGGATCGAAACCATCCTCTGCTAGGGAGCG	GCGGAAGCGTGCTGGGCCCATAACCCAGAGGTTGATGGATCGAAACCATCCTCTGCTAGGGAGCG
m5C	chr6:26330326(-)	miCLIP (High)	Human	AL021917.1	rs542567620	chr6:26330326..26330326	dbSNP153	RBP 10		GCGGAAGCGTGCTGGGCCCATAACCCAGAGGTCGATGGATCGAAACCATCCTCTGCTAGGGAGCG	GCGGAAGCGTGCTGGGCCCATAACCCAGAGGTGGATGGATCGAAACCATCCTCTGCTAGGGAGCG
m5C	chr6:26330326(-)	miCLIP (High)	Human	AL021917.1	rs542567620	chr6:26330326..26330326	dbSNP153	RBP 10		GCGGAAGCGTGCTGGGCCCATAACCCAGAGGTCGATGGATCGAAACCATCCTCTGCTAGGGAGCG	GCGGAAGCGTGCTGGGCCCATAACCCAGAGGTAGATGGATCGAAACCATCCTCTGCTAGGGAGCG
m5C	chr6:27230572(-)	miCLIP (High)	Human	tRNA-Leu-TAA-4-1,piR-53944,lnc-POM121L2-3	rs577952591	chr6:27230572..27230572	dbSNP153	RBP 20		TAAGATCCAATGGACAGGTGTCCGCGTGGGTTCGAGCCCCACTCCCGGTAAGCGTTGGTGTGTAC	TAAGATCCAATGGACAGGTGTCCGCGTGGGTTTGAGCCCCACTCCCGGTAAGCGTTGGTGTGTAC
m5C	chr6:27230572(-)	miCLIP (High)	Human	tRNA-Leu-TAA-4-1,piR-53944,lnc-POM121L2-3	rs577952591	chr6:27230572..27230572	dbSNP153	RBP 20		TAAGATCCAATGGACAGGTGTCCGCGTGGGTTCGAGCCCCACTCCCGGTAAGCGTTGGTGTGTAC	TAAGATCCAATGGACAGGTGTCCGCGTGGGTTGGAGCCCCACTCCCGGTAAGCGTTGGTGTGTAC
m5C	chr6:28123104(-)	BS-Seq (High)	Human	ZSCAN16-AS1	rs1373202600	chr6:28123104..28123104	dbSNP153	RBP 2		CCTGGGCTCAAGTGATCTTCTCGCCTCAGCCTCCTGAGTAGCTGGAGCTACAGGTGTGAGCTACC	CCTGGGCTCAAGTGATCTTCTCGCCTCAGCCTGCTGAGTAGCTGGAGCTACAGGTGTGAGCTACC
m5C	chr6:28123115(-)	BS-Seq (High)	Human	ZSCAN16-AS1	rs761165264	chr6:28123115..28123115	dbSNP153	RBP 1 Splice 3		AGCCTGAAACTCCTGGGCTCAAGTGATCTTCTCGCCTCAGCCTCCTGAGTAGCTGGAGCTACAGG	AGCCTGAAACTCCTGGGCTCAAGTGATCTTCTTGCCTCAGCCTCCTGAGTAGCTGGAGCTACAGG
m5C	chr6:28123117(-)	BS-Seq (High)	Human	ZSCAN16-AS1	rs1342451723	chr6:28123115..28123118	dbSNP153	RBP 2 Splice 3		GCAGCCTGAAACTCCTGGGCTCAAGTGATCTTCTCGCCTCAGCCTCCTGAGTAGCTGGAGCTACA	GCAGCCTGAAACTCCTGGGCTCAAGTGATCT___CGCCTCAGCCTCCTGAGTAGCTGGAGCTACA
m5C	chr6:28941087(+)	BS-Seq (High)	Human	lnc-OR2J1-12,TRL-CAA1-2,TRL-CAA1-1-001,tRNA-Leu,tRNA-Leu:2,tRNA-Leu:3,TRL-CAA1-2:2,tRNA-Leu-CAA-1-1	rs1477066063	chr6:28941087..28941087	dbSNP153	RBP 24		CAGGATGGCCGAGTGGTCTAAGGCGCCAGACTCAAGCTTGGCTTCCTCGTGTTGAGGATTCTGGT	CAGGATGGCCGAGTGGTCTAAGGCGCCAGACTTAAGCTTGGCTTCCTCGTGTTGAGGATTCTGGT
m5C	chr6:31742953(-)	BS-Seq (High)	Human	RF00017-4520,lnc-BBS5-6	rs1354900345	chr6:31742953..31742953	dbSNP153			TTCCCTCTATCCTTTACCAAGTCCTTACCAAGCTTTCCCAGAAATCGAGTCATATTCTCATCCTG	TTCCCTCTATCCTTTACCAAGTCCTTACCAAGTTTTCCCAGAAATCGAGTCATATTCTCATCCTG
m5C	chr6:31837422(+)	BS-Seq (High)	Human	SNHG32,AL671762.1	rs763178248	chr6:31837419..31837422	dbSNP153	RBP 13 Splice 11 circRNA 2		GGCTGGGAGAGGTGGAGAGCCATGCCTGTTCTCCTTCCTTGCTATGGTGAGTATCTTTTGTTTTG	GGCTGGGAGAGGTGGAGAGCCATGCCTGTT___CTTCCTTGCTATGGTGAGTATCTTTTGTTTTG
m5C	chr6:31837422(+)	BS-Seq (High)	Human	SNHG32,AL671762.1	rs1225083001	chr6:31837421..31837423	dbSNP153	RBP 13 Splice 11 circRNA 2		GGCTGGGAGAGGTGGAGAGCCATGCCTGTTCTCCTTCCTTGCTATGGTGAGTATCTTTTGTTTTG	GGCTGGGAGAGGTGGAGAGCCATGCCTGTTCT__TTCCTTGCTATGGTGAGTATCTTTTGTTTTG
m5C	chr6:31837422(+)	BS-Seq (High)	Human	SNHG32,AL671762.1	rs370329009	chr6:31837422..31837422	dbSNP153	RBP 13 Splice 11 circRNA 2		GGCTGGGAGAGGTGGAGAGCCATGCCTGTTCTCCTTCCTTGCTATGGTGAGTATCTTTTGTTTTG	GGCTGGGAGAGGTGGAGAGCCATGCCTGTTCTGCTTCCTTGCTATGGTGAGTATCTTTTGTTTTG
m5C	chr6:31839540(+)	BS-Seq (High)	Human	SNHG32,AL671762.1	rs1247833465	chr6:31839540..31839540	dbSNP153	RBP 6		CATATGGTTCTAATGTTCTTTTTATTATTTTTCAGGAATTTGCTGACACAATATCTTCCGCCTGG	CATATGGTTCTAATGTTCTTTTTATTATTTTTTAGGAATTTGCTGACACAATATCTTCCGCCTGG
m5C	chr6:149863657(+)	BS-Seq (High)	Human	AL355312.3	rs1350773996	chr6:149863657..149863657	dbSNP153			CGCCACGCATTGCCGCCAGCCCCGCACGGCCGCCGGCGCCCGCAGGAAGCTGGCACCCGCCGCCA	CGCCACGCATTGCCGCCAGCCCCGCACGGCCGTCGGCGCCCGCAGGAAGCTGGCACCCGCCGCCA
m5C	chr6:149863663(+)	BS-Seq (High)	Human	AL355312.3	rs1208695231	chr6:149863663..149863663	dbSNP153			GCATTGCCGCCAGCCCCGCACGGCCGCCGGCGCCCGCAGGAAGCTGGCACCCGCCGCCAGGGAGT	GCATTGCCGCCAGCCCCGCACGGCCGCCGGCGGCCGCAGGAAGCTGGCACCCGCCGCCAGGGAGT
m5C	chr6:71420194(-)	BS-Seq (High)	Human	LINC00472	rs1323688712	chr6:71420194..71420194	dbSNP153	RBP 1		GCGGCGCCTCCGCGGGGCGGCGCGACGCGGCCCGCCCCTCGCGTCCGCGGTCATCGCGGGTGACT	GCGGCGCCTCCGCGGGGCGGCGCGACGCGGCCGGCCCCTCGCGTCCGCGGTCATCGCGGGTGACT
m5C	chr6:151225981(-)	BS-Seq (High)	Human	AL138733.1	rs878955946	chr6:151225981..151225981	dbSNP153	RBP 3		GCCGAGTCGTGCGGAGGCGGAGGCTTGGGTGCCTTCAAGATTCAGCTTCACCCGTAATCCACCGC	GCCGAGTCGTGCGGAGGCGGAGGCTTGGGTGCGTTCAAGATTCAGCTTCACCCGTAATCCACCGC
m5C	chr6:158313025(+)	BS-Seq (High)	Human	AL360169.2,TULP4	rs555689146	chr6:158313025..158313025	dbSNP153	RBP 9 circRNA 10		TTTTCATCAAGATGGAAAAAGATCTTTAGGAGCAGAAAAGGGGAGTGCTAACTGGGGGAGCGAGA	TTTTCATCAAGATGGAAAAAGATCTTTAGGAGTAGAAAAGGGGAGTGCTAACTGGGGGAGCGAGA
m5C	chr6:136613170(+)	BS-Seq (High)	Human	MAP3K5-AS1,MAP3K5-AS1:2,MAP3K5-AS1:3	-	chr6:136613170..136613170	TCGA,ICGC,COSMIC			TATCTGATTGTCATGGAGATATTTTAATCCTTCCAGTATTTGCTTTGTATAAAAGCCAATTGTTT	TATCTGATTGTCATGGAGATATTTTAATCCTTACAGTATTTGCTTTGTATAAAAGCCAATTGTTT
m5C	chr6:31624519(-)	BS-Seq (High)	Human	lnc-BBS5-6	-	chr6:31624519..31624519	TCGA,ICGC,COSMIC			ACAGCTCCCCAATTAAGTGCTGCACTCACCATCTCCATGTGCTCCATGGGTGACGCTGGCTTGTG	ACAGCTCCCCAATTAAGTGCTGCACTCACCATGTCCATGTGCTCCATGGGTGACGCTGGCTTGTG
m5C	chr6:31742953(-)	BS-Seq (High)	Human	RF00017-4520,lnc-BBS5-6	rs1354900345	chr6:31742953..31742953	ICGC			TTCCCTCTATCCTTTACCAAGTCCTTACCAAGCTTTCCCAGAAATCGAGTCATATTCTCATCCTG	TTCCCTCTATCCTTTACCAAGTCCTTACCAAGTTTTCCCAGAAATCGAGTCATATTCTCATCCTG
m5C	chr6:27230572(-)	miCLIP (High)	Human	tRNA-Leu-TAA-4-1,piR-53944,lnc-POM121L2-3	rs577952591	chr6:27230572..27230572	ICGC	RBP 20		TAAGATCCAATGGACAGGTGTCCGCGTGGGTTCGAGCCCCACTCCCGGTAAGCGTTGGTGTGTAC	TAAGATCCAATGGACAGGTGTCCGCGTGGGTTTGAGCCCCACTCCCGGTAAGCGTTGGTGTGTAC
m5C	chr6:26286585(+)	miCLIP (High)	Human	tRNA-iMet-CAT-1-1,TRX-CAT1-1,lnc-HIST1H2BI-2,lnc-HIST1H2BI-2:2,lnc-HIST1H2BI-2:3,lnc-HIST1H2BI-2:4	rs1282709415	chr6:26286585..26286585	ICGC	RBP 10		GGGCCCATAACCCAGAGGTCGATGGATCGAAACCATCCTCTGCTAGGTCCTTTTTTTTTCTCCCC	GGGCCCATAACCCAGAGGTCGATGGATCGAAATCATCCTCTGCTAGGTCCTTTTTTTTTCTCCCC
m5C	chr7:106660374(-)	BS-Seq (High)	Human	AC004917.1,CCDC71L	rs1355606071	chr7:106660374..106660374	dbSNP153	RBP 3		AGCCCGTGGCCCCCGGGCCCTGCTTCGGGGGCCGCACCTTGGAGGAGATCTGGAGGGCGGCCACC	AGCCCGTGGCCCCCGGGCCCTGCTTCGGGGGCTGCACCTTGGAGGAGATCTGGAGGGCGGCCACC
m5C	chr7:106660393(-)	BS-Seq (High)	Human	AC004917.1,CCDC71L	rs750612620	chr7:106660393..106660393	dbSNP153	RBP 1		GAGGAGAGCTGCCCGGCCAAGCCCGTGGCCCCCGGGCCCTGCTTCGGGGGCCGCACCTTGGAGGA	GAGGAGAGCTGCCCGGCCAAGCCCGTGGCCCCTGGGCCCTGCTTCGGGGGCCGCACCTTGGAGGA
m5C	chr7:106660397(-)	BS-Seq (High)	Human	AC004917.1,CCDC71L	rs1244412506	chr7:106660397..106660397	dbSNP153	RBP 1		CCCCGAGGAGAGCTGCCCGGCCAAGCCCGTGGCCCCCGGGCCCTGCTTCGGGGGCCGCACCTTGG	CCCCGAGGAGAGCTGCCCGGCCAAGCCCGTGGTCCCCGGGCCCTGCTTCGGGGGCCGCACCTTGG
m5C	chr7:106660397(-)	BS-Seq (High)	Human	AC004917.1,CCDC71L	rs1244412506	chr7:106660397..106660397	dbSNP153	RBP 1		CCCCGAGGAGAGCTGCCCGGCCAAGCCCGTGGCCCCCGGGCCCTGCTTCGGGGGCCGCACCTTGG	CCCCGAGGAGAGCTGCCCGGCCAAGCCCGTGGACCCCGGGCCCTGCTTCGGGGGCCGCACCTTGG
m5C	chr7:106660428(-)	BS-Seq (High)	Human	AC004917.1,CCDC71L	rs1258722563	chr7:106660428..106660428	dbSNP153			AGCCCCGGCCGCCACCCCCACCGCCGCCGCCCCCCGAGGAGAGCTGCCCGGCCAAGCCCGTGGCC	AGCCCCGGCCGCCACCCCCACCGCCGCCGCCCTCCGAGGAGAGCTGCCCGGCCAAGCCCGTGGCC
m5C	chr7:106660831(-)	BS-Seq (High)	Human	AC004917.1,CCDC71L	rs1460001520	chr7:106660831..106660831	dbSNP153	RBP 1		CGCCCGGTCGCCCCGGCCACGGCCGCCCGGGGCGGCGACTTTAGGGCAGAAGACGGGGCTGGGTT	CGCCCGGTCGCCCCGGCCACGGCCGCCCGGGGTGGCGACTTTAGGGCAGAAGACGGGGCTGGGTT
m5C	chr7:106660846(-)	BS-Seq (High)	Human	AC004917.1,CCDC71L	rs1256680414	chr7:106660846..106660846	dbSNP153			AGGCGGCGGCGCCGGCGCCCGGTCGCCCCGGCCACGGCCGCCCGGGGCGGCGACTTTAGGGCAGA	AGGCGGCGGCGCCGGCGCCCGGTCGCCCCGGCTACGGCCGCCCGGGGCGGCGACTTTAGGGCAGA
m5C	chr7:106660847(-)	BS-Seq (High)	Human	AC004917.1,CCDC71L	rs1483498664	chr7:106660847..106660847	dbSNP153			GAGGCGGCGGCGCCGGCGCCCGGTCGCCCCGGCCACGGCCGCCCGGGGCGGCGACTTTAGGGCAG	GAGGCGGCGGCGCCGGCGCCCGGTCGCCCCGGACACGGCCGCCCGGGGCGGCGACTTTAGGGCAG
m5C	chr7:106660850(-)	BS-Seq (High)	Human	AC004917.1,CCDC71L	rs1210072165	chr7:106660850..106660850	dbSNP153			GAAGAGGCGGCGGCGCCGGCGCCCGGTCGCCCCGGCCACGGCCGCCCGGGGCGGCGACTTTAGGG	GAAGAGGCGGCGGCGCCGGCGCCCGGTCGCCCTGGCCACGGCCGCCCGGGGCGGCGACTTTAGGG
m5C	chr7:106660853(-)	BS-Seq (High)	Human	AC004917.1,CCDC71L	rs778266226	chr7:106660853..106660853	dbSNP153	RBP 1		TATGAAGAGGCGGCGGCGCCGGCGCCCGGTCGCCCCGGCCACGGCCGCCCGGGGCGGCGACTTTA	TATGAAGAGGCGGCGGCGCCGGCGCCCGGTCGTCCCGGCCACGGCCGCCCGGGGCGGCGACTTTA
m5C	chr7:106660853(-)	BS-Seq (High)	Human	AC004917.1,CCDC71L	rs778266226	chr7:106660853..106660853	dbSNP153	RBP 1		TATGAAGAGGCGGCGGCGCCGGCGCCCGGTCGCCCCGGCCACGGCCGCCCGGGGCGGCGACTTTA	TATGAAGAGGCGGCGGCGCCGGCGCCCGGTCGGCCCGGCCACGGCCGCCCGGGGCGGCGACTTTA
m5C	chr7:128457811(+)	BS-Seq (High)	Human	AC010655.2,AC010655.4,HILPDA	rs1479767186	chr7:128457781..128457812	dbSNP153	RBP 2 circRNA 4		GCAGAGGCCTGTAATCCCAGCTCCTTGGGAGGCTGAGGCGGGAGAATTGCTTGAACCCGGGGACG	GCA_______________________________GAGGCGGGAGAATTGCTTGAACCCGGGGACG
m5C	chr7:128657112(+)	BS-Seq (High)	Human	LINC01000,LINC01000:2	rs1473301501	chr7:128657112..128657112	dbSNP153			GGAAACAGGTCACCTTGGAAGGCGTCCCTGGGCCCCCATCCCCAGGGGTAGGGGCCGTAGGGGGC	GGAAACAGGTCACCTTGGAAGGCGTCCCTGGGACCCCATCCCCAGGGGTAGGGGCCGTAGGGGGC
m5C	chr7:131108220(-)	BS-Seq (High)	Human	LINC-PINT,AC016831.6	rs1178632644	chr7:131108220..131108220	dbSNP153	circRNA 5		GGTGGAGGTACGGACGCCGCTGCGGCCGCCGCCGCCAGTCCTGCTGCTGTTGTTGCTGCTGCAGT	GGTGGAGGTACGGACGCCGCTGCGGCCGCCGCTGCCAGTCCTGCTGCTGTTGTTGCTGCTGCAGT
m5C	chr7:131108233(-)	BS-Seq (High)	Human	LINC-PINT,AC016831.6	rs980506437	chr7:131108233..131108233	dbSNP153	RBP 1 circRNA 5		GGGGCTCCCGGTGGGTGGAGGTACGGACGCCGCTGCGGCCGCCGCCGCCAGTCCTGCTGCTGTTG	GGGGCTCCCGGTGGGTGGAGGTACGGACGCCGTTGCGGCCGCCGCCGCCAGTCCTGCTGCTGTTG
m5C	chr7:92458042(+)	BS-Seq (High)	Human	AC007566.1,GATAD1	rs1251702987	chr7:92458042..92458042	dbSNP153			GCCTGTAATCCCAGCTACTCGGGAGGCTGAGGCAGGAGAATTGCTTGAACTCGGGAGGTGGAGAT	GCCTGTAATCCCAGCTACTCGGGAGGCTGAGGTAGGAGAATTGCTTGAACTCGGGAGGTGGAGAT
m5C	chr7:94421045(-)	BS-Seq (High)	Human	lnc-SGCE-3,lnc-SGCE-3:2	rs72658186	chr7:94421045..94421045	dbSNP153		GWAS_ID_15589	ATTGTAAATACTCACAGGGGGGCCTCCATCACCACGACTTCCAGCAGGACCGGGGGGACCATTTG	ATTGTAAATACTCACAGGGGGGCCTCCATCACTACGACTTCCAGCAGGACCGGGGGGACCATTTG
m5C	chr7:99261577(-)	BS-Seq (High)	Human	AC004834.1	rs895271278	chr7:99261577..99261577	dbSNP153			GAAGTGGACCTCGGGCCCCTTGCTCTTGCCCCCCTTGGGCTTCAGGAAGTTGCTGGACTTGCCCA	GAAGTGGACCTCGGGCCCCTTGCTCTTGCCCCTCTTGGGCTTCAGGAAGTTGCTGGACTTGCCCA
m5C	chr7:99299525(-)	BS-Seq (High)	Human	AC004834.1	rs559624368	chr7:99299525..99299525	dbSNP153	Splice 1		TCTTCTTCTTGAGCCGAAGTGCCTCTGCCCGGCCCTTGGCCTCTGCCTCTAGGCTGGCCTGCAAG	TCTTCTTCTTGAGCCGAAGTGCCTCTGCCCGGTCCTTGGCCTCTGCCTCTAGGCTGGCCTGCAAG
m5C	chr7:100118555(-)	BS-Seq (High)	Human	TAF6,AC073842.2	rs528261074	chr7:100118555..100118555	dbSNP153	Splice 9		ACTCCTCAGTTCAAGCGATCCTCCTGCCTCAGCCTCCTAAGTAGCTGGGATGACAGGTTCACACC	ACTCCTCAGTTCAAGCGATCCTCCTGCCTCAGTCTCCTAAGTAGCTGGGATGACAGGTTCACACC
m5C	chr7:102637260(-)	BS-Seq (High)	Human	AC105052.1,AC105052.4,AC105052.3,UPK3BL1	rs1213089371	chr7:102637260..102637260	dbSNP153	circRNA 9		CCTGAGTAGCTGGGACTACAGGCACACGCCACCATGCCCAGCTCATTTTTGTATTTTTAGTAGAG	CCTGAGTAGCTGGGACTACAGGCACACGCCACTATGCCCAGCTCATTTTTGTATTTTTAGTAGAG
m5C	chr7:102637266(-)	BS-Seq (High)	Human	AC105052.1,AC105052.4,AC105052.3,UPK3BL1	rs1442790763	chr7:102637266..102637266	dbSNP153	circRNA 9		CAGCCTCCTGAGTAGCTGGGACTACAGGCACACGCCACCATGCCCAGCTCATTTTTGTATTTTTA	CAGCCTCCTGAGTAGCTGGGACTACAGGCACATGCCACCATGCCCAGCTCATTTTTGTATTTTTA
m5C	chr7:102637291(-)	BS-Seq (High)	Human	AC105052.1,AC105052.4,AC105052.3,UPK3BL1	rs1302168270	chr7:102637291..102637291	dbSNP153	circRNA 9		ACGGGTTCAAGCGATTTTCCTGCTTCAGCCTCCTGAGTAGCTGGGACTACAGGCACACGCCACCA	ACGGGTTCAAGCGATTTTCCTGCTTCAGCCTCGTGAGTAGCTGGGACTACAGGCACACGCCACCA
m5C	chr7:102637292(-)	BS-Seq (High)	Human	AC105052.1,AC105052.4,AC105052.3,UPK3BL1	rs1440533411	chr7:102637292..102637292	dbSNP153	circRNA 9		CACGGGTTCAAGCGATTTTCCTGCTTCAGCCTCCTGAGTAGCTGGGACTACAGGCACACGCCACC	CACGGGTTCAAGCGATTTTCCTGCTTCAGCCTTCTGAGTAGCTGGGACTACAGGCACACGCCACC
m5C	chr7:102637295(-)	BS-Seq (High)	Human	AC105052.1,AC105052.4,AC105052.3,UPK3BL1	rs1392359782	chr7:102637295..102637295	dbSNP153	circRNA 9		CCTCACGGGTTCAAGCGATTTTCCTGCTTCAGCCTCCTGAGTAGCTGGGACTACAGGCACACGCC	CCTCACGGGTTCAAGCGATTTTCCTGCTTCAGTCTCCTGAGTAGCTGGGACTACAGGCACACGCC
m5C	chr7:150397304(+)	BS-Seq (High)	Human	ZNF775,AC073111.3	rs781212238	chr7:150397304..150397304	dbSNP153			GGGCCCGGGCCGCGGTCTCCGGCCCCGAGGGGCCGGGCGAGCCGCGCCAGTTCATCTGCAACGAG	GGGCCCGGGCCGCGGTCTCCGGCCCCGAGGGGACGGGCGAGCCGCGCCAGTTCATCTGCAACGAG
m5C	chr7:66377100(-)	BS-Seq (High)	Human	LINC00174	rs936200145	chr7:66377100..66377100	dbSNP153			CGGCAGCCCCGGCAGGCCCGGCTCCCGCCTGCCGGGGGCCTCTTGAGGAGGCTCATCTCGTGCCC	CGGCAGCCCCGGCAGGCCCGGCTCCCGCCTGCTGGGGGCCTCTTGAGGAGGCTCATCTCGTGCCC
m5C	chr7:27097031(+)	BS-Seq (High)	Human	HOTAIRM1	rs553721686	chr7:27097031..27097031	dbSNP153	RBP 1		GAGAGAGATGACGCTGGCGGACGTGGCCAGCGCGGGGGCCGGGCGGTGCGCTGCAGGCCATCTGC	GAGAGAGATGACGCTGGCGGACGTGGCCAGCGTGGGGGCCGGGCGGTGCGCTGCAGGCCATCTGC
m5C	chr7:32728203(+)	BS-Seq (High)	Human	lnc-AVL9-6	rs1396704160	chr7:32728203..32728203	dbSNP153	circRNA 2		CGCCGGAGAGGAGGCGGTGGGGAGGCCCGGGGCGCCAAGCGCGACGGCAGAAAGCGGCAGCGGCC	CGCCGGAGAGGAGGCGGTGGGGAGGCCCGGGGTGCCAAGCGCGACGGCAGAAAGCGGCAGCGGCC
m5C	chr7:32754381(+)	BS-Seq (High)	Human	lnc-AVL9-6	rs117676244	chr7:32754381..32754381	dbSNP153	RBP 3 circRNA 2		TGTGGGGAAAAGAAAGAGAAATCAGATTGTTGCGGCGTCTGTGTAGAAAGAAGTAGATATAGGAG	TGTGGGGAAAAGAAAGAGAAATCAGATTGTTGGGGCGTCTGTGTAGAAAGAAGTAGATATAGGAG
m5C	chr7:32754381(+)	BS-Seq (High)	Human	lnc-AVL9-6	rs117676244	chr7:32754381..32754381	dbSNP153	RBP 3 circRNA 2		TGTGGGGAAAAGAAAGAGAAATCAGATTGTTGCGGCGTCTGTGTAGAAAGAAGTAGATATAGGAG	TGTGGGGAAAAGAAAGAGAAATCAGATTGTTGTGGCGTCTGTGTAGAAAGAAGTAGATATAGGAG
m5C	chr7:38378197(+)	BS-Seq (High)	Human	TRG-AS1	rs1349798313	chr7:38378197..38378197	dbSNP153			GCTTGAACCCAGGAGGCAGAAGCTGCAGTGAGCCAAGATCGCACCACTGCACTCTAGCCTGGGCA	GCTTGAACCCAGGAGGCAGAAGCTGCAGTGAGGCAAGATCGCACCACTGCACTCTAGCCTGGGCA
m5C	chr7:43986645(-)	BS-Seq (High)	Human	AC004951.2,POLR2J4,AC004951.4	rs907124465	chr7:43986645..43986645	dbSNP153	RBP 9 Splice 6 circRNA 21		GGTGAAGTTCCTGGTGATGAATGACAAAGGACCCGTGGCTGAAACAAAGTGGTCCAGCAACACTC	GGTGAAGTTCCTGGTGATGAATGACAAAGGACACGTGGCTGAAACAAAGTGGTCCAGCAACACTC
m5C	chr7:44007744(-)	BS-Seq (High)	Human	POLR2J4,AC004951.1,AC004951.4	rs1338740038	chr7:44007744..44007744	dbSNP153,HGVD	circRNA 15		CTGGAGCTCTAGGAAAGGCGAGCGCGATCTCGCGCCCACACCCAGTGCTCTGGGTCATAAGCCTG	CTGGAGCTCTAGGAAAGGCGAGCGCGATCTCGTGCCCACACCCAGTGCTCTGGGTCATAAGCCTG
m5C	chr7:44007744(-)	BS-Seq (High)	Human	POLR2J4,AC004951.1,AC004951.4	-	chr7:44007744..44007744	HGVD	circRNA 15		CTGGAGCTCTAGGAAAGGCGAGCGCGATCTCGCGCCCACACCCAGTGCTCTGGGTCATAAGCCTG	CTGGAGCTCTAGGAAAGGCGAGCGCGATCTCGGGCCCACACCCAGTGCTCTGGGTCATAAGCCTG
m5C	chr7:44007752(-)	BS-Seq (High)	Human	POLR2J4,AC004951.1,AC004951.4	rs540570255	chr7:44007752..44007752	dbSNP153	circRNA 15		CACGGTCCCTGGAGCTCTAGGAAAGGCGAGCGCGATCTCGCGCCCACACCCAGTGCTCTGGGTCA	CACGGTCCCTGGAGCTCTAGGAAAGGCGAGCGTGATCTCGCGCCCACACCCAGTGCTCTGGGTCA
m5C	chr7:44007754(-)	BS-Seq (High)	Human	POLR2J4,AC004951.1,AC004951.4	rs755154395	chr7:44007754..44007754	dbSNP153	RBP 1 circRNA 15		TCCACGGTCCCTGGAGCTCTAGGAAAGGCGAGCGCGATCTCGCGCCCACACCCAGTGCTCTGGGT	TCCACGGTCCCTGGAGCTCTAGGAAAGGCGAGTGCGATCTCGCGCCCACACCCAGTGCTCTGGGT
m5C	chr7:453182(+)	BS-Seq (High)	Human	HSALNG0055535	rs992010121	chr7:453182..453182	dbSNP153			AGAAGCTGCGTTTGAGGCACGCAGGGGAAGCCCCAGCCCCCTGAAGAGGAGGAGCCTCCACGGCC	AGAAGCTGCGTTTGAGGCACGCAGGGGAAGCCTCAGCCCCCTGAAGAGGAGGAGCCTCCACGGCC
m5C	chr7:453186(+)	BS-Seq (High)	Human	HSALNG0055535	rs772137756	chr7:453186..453186	dbSNP153			GCTGCGTTTGAGGCACGCAGGGGAAGCCCCAGCCCCCTGAAGAGGAGGAGCCTCCACGGCCAGCA	GCTGCGTTTGAGGCACGCAGGGGAAGCCCCAGGCCCCTGAAGAGGAGGAGCCTCCACGGCCAGCA
m5C	chr7:453186(+)	BS-Seq (High)	Human	HSALNG0055535	rs772137756	chr7:453186..453186	dbSNP153			GCTGCGTTTGAGGCACGCAGGGGAAGCCCCAGCCCCCTGAAGAGGAGGAGCCTCCACGGCCAGCA	GCTGCGTTTGAGGCACGCAGGGGAAGCCCCAGTCCCCTGAAGAGGAGGAGCCTCCACGGCCAGCA
m5C	chr7:453187(+)	BS-Seq (High)	Human	HSALNG0055535	rs1562466457	chr7:453187..453187	dbSNP153			CTGCGTTTGAGGCACGCAGGGGAAGCCCCAGCCCCCTGAAGAGGAGGAGCCTCCACGGCCAGCAC	CTGCGTTTGAGGCACGCAGGGGAAGCCCCAGCTCCCTGAAGAGGAGGAGCCTCCACGGCCAGCAC
m5C	chr7:453188(+)	BS-Seq (High)	Human	HSALNG0055535	rs917768855	chr7:453188..453188	dbSNP153			TGCGTTTGAGGCACGCAGGGGAAGCCCCAGCCCCCTGAAGAGGAGGAGCCTCCACGGCCAGCACA	TGCGTTTGAGGCACGCAGGGGAAGCCCCAGCCTCCTGAAGAGGAGGAGCCTCCACGGCCAGCACA
m5C	chr7:453210(+)	BS-Seq (High)	Human	HSALNG0055535	rs978254043	chr7:453210..453210	dbSNP153			AGCCCCAGCCCCCTGAAGAGGAGGAGCCTCCACGGCCAGCACAGGCCGTGGTCCCTGGAGACACT	AGCCCCAGCCCCCTGAAGAGGAGGAGCCTCCATGGCCAGCACAGGCCGTGGTCCCTGGAGACACT
m5C	chr7:7969448(+)	BS-Seq (High)	Human	AC007161.3,GLCCI1	rs1252511201	chr7:7969448..7969448	dbSNP153	RBP 3		GATGAGGCGCAGCGCCGCGGGGTCCCCGCCCGCCGTCGCCGCCGCCGGGAGCGGGAACGGTGCGG	GATGAGGCGCAGCGCCGCGGGGTCCCCGCCCGGCGTCGCCGCCGCCGGGAGCGGGAACGGTGCGG
m5C	chr7:7969448(+)	BS-Seq (High)	Human	AC007161.3,GLCCI1	rs1252511201	chr7:7969448..7969448	dbSNP153	RBP 3		GATGAGGCGCAGCGCCGCGGGGTCCCCGCCCGCCGTCGCCGCCGCCGGGAGCGGGAACGGTGCGG	GATGAGGCGCAGCGCCGCGGGGTCCCCGCCCGTCGTCGCCGCCGCCGGGAGCGGGAACGGTGCGG
m5C	chr7:7969452(+)	BS-Seq (High)	Human	AC007161.3,GLCCI1	rs1421172615	chr7:7969452..7969452	dbSNP153	RBP 3		AGGCGCAGCGCCGCGGGGTCCCCGCCCGCCGTCGCCGCCGCCGGGAGCGGGAACGGTGCGGGCGG	AGGCGCAGCGCCGCGGGGTCCCCGCCCGCCGTAGCCGCCGCCGGGAGCGGGAACGGTGCGGGCGG
m5C	chr7:7969482(+)	BS-Seq (High)	Human	AC007161.3,GLCCI1	rs530365789	chr7:7969479..7969482	dbSNP153	RBP 2		GTCGCCGCCGCCGGGAGCGGGAACGGTGCGGGCGGCGGCGGCGGCGTGGGCTGCGCCCCGGCTGC	GTCGCCGCCGCCGGGAGCGGGAACGGTGCG___GGCGGCGGCGGCGTGGGCTGCGCCCCGGCTGC
m5C	chr7:7969485(+)	BS-Seq (High)	Human	AC007161.3,GLCCI1	rs1019630165	chr7:7969485..7969485	dbSNP153	RBP 2		GCCGCCGCCGGGAGCGGGAACGGTGCGGGCGGCGGCGGCGGCGTGGGCTGCGCCCCGGCTGCGGG	GCCGCCGCCGGGAGCGGGAACGGTGCGGGCGGAGGCGGCGGCGTGGGCTGCGCCCCGGCTGCGGG
m5C	chr7:7969485(+)	BS-Seq (High)	Human	AC007161.3,GLCCI1	rs1019630165	chr7:7969485..7969485	dbSNP153	RBP 2		GCCGCCGCCGGGAGCGGGAACGGTGCGGGCGGCGGCGGCGGCGTGGGCTGCGCCCCGGCTGCGGG	GCCGCCGCCGGGAGCGGGAACGGTGCGGGCGGTGGCGGCGGCGTGGGCTGCGCCCCGGCTGCGGG
m5C	chr7:7969488(+)	BS-Seq (High)	Human	AC007161.3,GLCCI1	rs1236190732	chr7:7969488..7969488	dbSNP153	RBP 2		GCCGCCGGGAGCGGGAACGGTGCGGGCGGCGGCGGCGGCGTGGGCTGCGCCCCGGCTGCGGGAGC	GCCGCCGGGAGCGGGAACGGTGCGGGCGGCGGTGGCGGCGTGGGCTGCGCCCCGGCTGCGGGAGC
m5C	chr7:7969491(+)	BS-Seq (High)	Human	AC007161.3,GLCCI1	rs552933583	chr7:7969491..7969491	dbSNP153	RBP 2		GCCGGGAGCGGGAACGGTGCGGGCGGCGGCGGCGGCGTGGGCTGCGCCCCGGCTGCGGGAGCCGG	GCCGGGAGCGGGAACGGTGCGGGCGGCGGCGGAGGCGTGGGCTGCGCCCCGGCTGCGGGAGCCGG
m5C	chr7:7969491(+)	BS-Seq (High)	Human	AC007161.3,GLCCI1	rs552933583	chr7:7969491..7969491	dbSNP153	RBP 2		GCCGGGAGCGGGAACGGTGCGGGCGGCGGCGGCGGCGTGGGCTGCGCCCCGGCTGCGGGAGCCGG	GCCGGGAGCGGGAACGGTGCGGGCGGCGGCGGGGGCGTGGGCTGCGCCCCGGCTGCGGGAGCCGG
m5C	chr7:7969613(+)	BS-Seq (High)	Human	AC007161.3,GLCCI1	rs531112603	chr7:7969611..7969614	dbSNP153	RBP 1		GCACAGTCCCACGCGTCCGCCCGTCGCCGCTGCCGCCGCCTCGCTGGGCAGCCTCCCGGGGCCCG	GCACAGTCCCACGCGTCCGCCCGTCGCCGCT___GCCGCCTCGCTGGGCAGCCTCCCGGGGCCCG
m5C	chr7:7969613(+)	BS-Seq (High)	Human	AC007161.3,GLCCI1	rs1182940309	chr7:7969613..7969613	dbSNP153	RBP 1		GCACAGTCCCACGCGTCCGCCCGTCGCCGCTGCCGCCGCCTCGCTGGGCAGCCTCCCGGGGCCCG	GCACAGTCCCACGCGTCCGCCCGTCGCCGCTGTCGCCGCCTCGCTGGGCAGCCTCCCGGGGCCCG
m5C	chr7:7969653(+)	BS-Seq (High)	Human	AC007161.3,GLCCI1	rs1340687232	chr7:7969653..7969653	dbSNP153	miRNA 1		TCGCTGGGCAGCCTCCCGGGGCCCGGCGCGGCCCGCGGCCCCAGCCCGTCCAGCCCGACGCCGCC	TCGCTGGGCAGCCTCCCGGGGCCCGGCGCGGCTCGCGGCCCCAGCCCGTCCAGCCCGACGCCGCC
m5C	chr7:7969659(+)	BS-Seq (High)	Human	AC007161.3,GLCCI1	rs1216901817	chr7:7969659..7969659	dbSNP153	miRNA 2		GGCAGCCTCCCGGGGCCCGGCGCGGCCCGCGGCCCCAGCCCGTCCAGCCCGACGCCGCCGGCGGC	GGCAGCCTCCCGGGGCCCGGCGCGGCCCGCGGTCCCAGCCCGTCCAGCCCGACGCCGCCGGCGGC
m5C	chr7:11407314(+)	BS-Seq (High)	Human	AC004160.2,AC004160.1	rs1428450682	chr7:11407314..11407314	dbSNP153			ATATAAGTTATGGTACAAACAAACCTGTGAGGCCACATGTTTGAGAACATTCTGACCAAGGAGAC	ATATAAGTTATGGTACAAACAAACCTGTGAGGACACATGTTTGAGAACATTCTGACCAAGGAGAC
m5C	chr7:54811980(-)	BS-Seq (High)	Human	lnc-SEC61G-1	rs1328685116	chr7:54811980..54811980	dbSNP153			TTCTTCTCTTTGGCAGTGGGAGGCCATGAGAGCCGGAATTCTCACGAGCAGCAGCGGCCCTGTGG	TTCTTCTCTTTGGCAGTGGGAGGCCATGAGAGACGGAATTCTCACGAGCAGCAGCGGCCCTGTGG
m5C	chr7:43986645(-)	BS-Seq (High)	Human	AC004951.2,POLR2J4,AC004951.4	rs907124465	chr7:43986645..43986645	ICGC	RBP 9 Splice 6 circRNA 21		GGTGAAGTTCCTGGTGATGAATGACAAAGGACCCGTGGCTGAAACAAAGTGGTCCAGCAACACTC	GGTGAAGTTCCTGGTGATGAATGACAAAGGACACGTGGCTGAAACAAAGTGGTCCAGCAACACTC
m5C	chr7:44007742(-)	BS-Seq (High)	Human	POLR2J4,AC004951.1,AC004951.4	-	chr7:44007742..44007742	TCGA,ICGC	circRNA 15		GGAGCTCTAGGAAAGGCGAGCGCGATCTCGCGCCCACACCCAGTGCTCTGGGTCATAAGCCTGGA	GGAGCTCTAGGAAAGGCGAGCGCGATCTCGCGTCCACACCCAGTGCTCTGGGTCATAAGCCTGGA
m5C	chr7:44007752(-)	BS-Seq (High)	Human	POLR2J4,AC004951.1,AC004951.4	rs540570255	chr7:44007752..44007752	TCGA,ICGC	circRNA 15		CACGGTCCCTGGAGCTCTAGGAAAGGCGAGCGCGATCTCGCGCCCACACCCAGTGCTCTGGGTCA	CACGGTCCCTGGAGCTCTAGGAAAGGCGAGCGTGATCTCGCGCCCACACCCAGTGCTCTGGGTCA
m5C	chr7:94421046(-)	BS-Seq (High)	Human	lnc-SGCE-3,lnc-SGCE-3:2	-	chr7:94421046..94421046	TCGA,ICGC,COSMIC			CATTGTAAATACTCACAGGGGGGCCTCCATCACCACGACTTCCAGCAGGACCGGGGGGACCATTT	CATTGTAAATACTCACAGGGGGGCCTCCATCAGCACGACTTCCAGCAGGACCGGGGGGACCATTT
m5C	chr7:43986639(-)	BS-Seq (High)	Human	AC004951.2,POLR2J4,AC004951.4	-	chr7:43986639..43986639	TCGA,ICGC	RBP 8 Splice 6 circRNA 21		GTTCCTGGTGATGAATGACAAAGGACCCGTGGCTGAAACAAAGTGGTCCAGCAACACTCGCCTGC	GTTCCTGGTGATGAATGACAAAGGACCCGTGGATGAAACAAAGTGGTCCAGCAACACTCGCCTGC
m5C	chr7:11407314(+)	BS-Seq (High)	Human	AC004160.2,AC004160.1	-	chr7:11407314..11407314	TCGA,ICGC,COSMIC			ATATAAGTTATGGTACAAACAAACCTGTGAGGCCACATGTTTGAGAACATTCTGACCAAGGAGAC	ATATAAGTTATGGTACAAACAAACCTGTGAGGTCACATGTTTGAGAACATTCTGACCAAGGAGAC
m5C	chr7:44007744(-)	BS-Seq (High)	Human	POLR2J4,AC004951.1,AC004951.4	rs1338740038	chr7:44007744..44007744	ICGC	circRNA 15		CTGGAGCTCTAGGAAAGGCGAGCGCGATCTCGCGCCCACACCCAGTGCTCTGGGTCATAAGCCTG	CTGGAGCTCTAGGAAAGGCGAGCGCGATCTCGTGCCCACACCCAGTGCTCTGGGTCATAAGCCTG
m5C	chr7:29742181(-)	BS-Seq (High)	Human	LOC646762	-	chr7:29742181..29742181	TCGA			TAAGGGAGGGTTAGCTGCATTGGAAGGGTCTTCCACATCCCAGATTTCAAGCATACTGCAACCAG	TAAGGGAGGGTTAGCTGCATTGGAAGGGTCTTTCACATCCCAGATTTCAAGCATACTGCAACCAG
m5C	chr7:65179393(-)	BS-Seq (High)	Human	LOC441242,LOC441242:2	-	chr7:65179393..65179393	ICGC			ATGTATGGACTGCAGACGTACTTCCTCAATTTCATCGTTGAACATGTCAACTAGGAAATCAAGGC	ATGTATGGACTGCAGACGTACTTCCTCAATTTAATCGTTGAACATGTCAACTAGGAAATCAAGGC
m5C	chr8:141436062(+)	BS-Seq (High)	Human	AC100803.4	rs770015200	chr8:141436062..141436062	dbSNP153			GAACAGTGCCATGGCTGCCGCCCGAATCCCGTCCCGCTCCTGCAAGGCAGAGGCTCAGAGGCACG	GAACAGTGCCATGGCTGCCGCCCGAATCCCGTTCCGCTCCTGCAAGGCAGAGGCTCAGAGGCACG
m5C	chr8:143575089(+)	BS-Seq (High)	Human	AC067930.4	rs773247938	chr8:143575089..143575089	dbSNP153	Splice 2		CTCTAGACTCTGCCAGGGATGGGAGCGGCTCACACAGCTGCAGGGAGGAGGTAAGGAAAGAGAAG	CTCTAGACTCTGCCAGGGATGGGAGCGGCTCAAACAGCTGCAGGGAGGAGGTAAGGAAAGAGAAG
m5C	chr8:143575310(+)	BS-Seq (High)	Human	AC067930.4	rs141565399	chr8:143575310..143575310	dbSNP153			CCTCAGCTCCTGCCCAGCCTGTGGCACTGGCTCTTCTGCTAACTGCAGCATGTCCATGAGTGGAG	CCTCAGCTCCTGCCCAGCCTGTGGCACTGGCTGTTCTGCTAACTGCAGCATGTCCATGAGTGGAG
m5C	chr8:143575310(+)	BS-Seq (High)	Human	AC067930.4	rs141565399	chr8:143575310..143575310	dbSNP153			CCTCAGCTCCTGCCCAGCCTGTGGCACTGGCTCTTCTGCTAACTGCAGCATGTCCATGAGTGGAG	CCTCAGCTCCTGCCCAGCCTGTGGCACTGGCTTTTCTGCTAACTGCAGCATGTCCATGAGTGGAG
m5C	chr8:120812259(+)	m5C-RIP-seq (High)	Human	AC104958.2	rs980647626	chr8:120812259..120812259	dbSNP153			CGGCCGCTCACCTGTTCCAGCCGCCGCAGCCTCGGCGGTCACACGCCACCCGCCCGCCCAGACCT	CGGCCGCTCACCTGTTCCAGCCGCCGCAGCCTTGGCGGTCACACGCCACCCGCCCGCCCAGACCT
m5C	chr8:127213091(-)	BS-Seq (High)	Human	CASC19	rs1326334178	chr8:127213091..127213091	dbSNP153			CCTCAGGGGGCTCCCAGTCTGGGAGTGGGGAGCCCCTGGCTTCCAAGTAATAGAAAGATCAATAT	CCTCAGGGGGCTCCCAGTCTGGGAGTGGGGAGTCCCTGGCTTCCAAGTAATAGAAAGATCAATAT
m5C	chr8:33015230(+)	miCLIP (High)	Human	AC090204.1	rs1165864189	chr8:33015230..33015230	dbSNP153			TAGAGTAAGGTCAGCTAAATAAGCTGTTGGGCCCATACCCCAAAAATGTTGGTTACACCCTTCCC	TAGAGTAAGGTCAGCTAAATAAGCTGTTGGGCGCATACCCCAAAAATGTTGGTTACACCCTTCCC
m5C	chr9:33624259(+)	BS-Seq (High)	Human	RF00017-071,lnc-BBS5-6	rs569793160	chr9:33624259..33624259	dbSNP153	RBP 3		TTTGGGGACGCTCTCAGCTCTCGGCGCACGGCCCAGCTTCCTTCAAAATGTCTACTGTTCACGAA	TTTGGGGACGCTCTCAGCTCTCGGCGCACGGCTCAGCTTCCTTCAAAATGTCTACTGTTCACGAA
m5C	chr9:33975429(+)	miCLIP (High)	Human	lnc-BBS5-6	rs1317811221	chr9:33975429..33975429	dbSNP153			ACTCCAGCCTGGGTGACAGAGTGAGGCTCTATCTTTAAAAAAAAAAAACAAAAAAAAAACCAAGT	ACTCCAGCCTGGGTGACAGAGTGAGGCTCTATTTTTAAAAAAAAAAAACAAAAAAAAAACCAAGT
m5C	chr9:35657963(-)	BS-Seq (High)	Human	RMRP,RMRP:2	rs151011853	chr9:35657962..35657963	dbSNP153	RBP 25 circRNA 3		CTAGGCTACACACTGAGGACTCTGTTCCTCCCCTTTCCGCCTAGGGGAAAGTCCCCGGACCTCGG	CTAGGCTACACACTGAGGACTCTGTTCCTCCC_TTTCCGCCTAGGGGAAAGTCCCCGGACCTCGG
m5C	chr9:35657963(-)	BS-Seq (High)	Human	RMRP,RMRP:2	rs999349961	chr9:35657963..35657963	dbSNP153	RBP 25 circRNA 3		CTAGGCTACACACTGAGGACTCTGTTCCTCCCCTTTCCGCCTAGGGGAAAGTCCCCGGACCTCGG	CTAGGCTACACACTGAGGACTCTGTTCCTCCCTTTTCCGCCTAGGGGAAAGTCCCCGGACCTCGG
m5C	chr9:35657963(-)	BS-Seq (High)	Human	RMRP,RMRP:2	rs999349961	chr9:35657963..35657963	dbSNP153	RBP 25 circRNA 3		CTAGGCTACACACTGAGGACTCTGTTCCTCCCCTTTCCGCCTAGGGGAAAGTCCCCGGACCTCGG	CTAGGCTACACACTGAGGACTCTGTTCCTCCCGTTTCCGCCTAGGGGAAAGTCCCCGGACCTCGG
m5C	chr9:35657963(-)	BS-Seq (High)	Human	RMRP,RMRP:2	rs999349961	chr9:35657963..35657963	dbSNP153	RBP 25 circRNA 3		CTAGGCTACACACTGAGGACTCTGTTCCTCCCCTTTCCGCCTAGGGGAAAGTCCCCGGACCTCGG	CTAGGCTACACACTGAGGACTCTGTTCCTCCCATTTCCGCCTAGGGGAAAGTCCCCGGACCTCGG
m5C	chr9:35657964(-)	BS-Seq (High)	Human	RMRP,RMRP:2	rs1032219537	chr9:35657964..35657964	dbSNP153	RBP 24 miRNA 1 circRNA 3		CCTAGGCTACACACTGAGGACTCTGTTCCTCCCCTTTCCGCCTAGGGGAAAGTCCCCGGACCTCG	CCTAGGCTACACACTGAGGACTCTGTTCCTCCTCTTTCCGCCTAGGGGAAAGTCCCCGGACCTCG
m5C	chr9:35657964(-)	BS-Seq (High)	Human	RMRP,RMRP:2	rs1032219537	chr9:35657964..35657964	dbSNP153	RBP 24 miRNA 1 circRNA 3		CCTAGGCTACACACTGAGGACTCTGTTCCTCCCCTTTCCGCCTAGGGGAAAGTCCCCGGACCTCG	CCTAGGCTACACACTGAGGACTCTGTTCCTCCACTTTCCGCCTAGGGGAAAGTCCCCGGACCTCG
m5C	chr9:35657965(-)	BS-Seq (High)	Human	RMRP,RMRP:2	rs193117694	chr9:35657965..35657965	dbSNP153	RBP 24 miRNA 1 circRNA 3		TCCTAGGCTACACACTGAGGACTCTGTTCCTCCCCTTTCCGCCTAGGGGAAAGTCCCCGGACCTC	TCCTAGGCTACACACTGAGGACTCTGTTCCTCTCCTTTCCGCCTAGGGGAAAGTCCCCGGACCTC
m5C	chr9:38545193(-)	BS-Seq (High)	Human	AL390726.2,FAM95C	rs527330277	chr9:38545193..38545193	dbSNP153	circRNA 2		GCACCGGGCACCCACCATGGGCAGCACTGTCCCATCTCAGGACTGGACTTTCTCAGATCCTGCAG	GCACCGGGCACCCACCATGGGCAGCACTGTCCTATCTCAGGACTGGACTTTCTCAGATCCTGCAG
m5C	chr9:38545199(-)	BS-Seq (High)	Human	AL390726.2,FAM95C	rs1294953143	chr9:38545199..38545199	dbSNP153	circRNA 2		TGTCAGGCACCGGGCACCCACCATGGGCAGCACTGTCCCATCTCAGGACTGGACTTTCTCAGATC	TGTCAGGCACCGGGCACCCACCATGGGCAGCATTGTCCCATCTCAGGACTGGACTTTCTCAGATC
m5C	chr9:38545201(-)	BS-Seq (High)	Human	AL390726.2,FAM95C	rs1232307664	chr9:38545201..38545201	dbSNP153	circRNA 2		GCTGTCAGGCACCGGGCACCCACCATGGGCAGCACTGTCCCATCTCAGGACTGGACTTTCTCAGA	GCTGTCAGGCACCGGGCACCCACCATGGGCAGTACTGTCCCATCTCAGGACTGGACTTTCTCAGA
m5C	chr9:81689893(+)	BS-Seq (High)	Human	AL591368.1	rs1455627079	chr9:81689893..81689893	dbSNP153	Splice 1		CCGGGCTTGGTGAGGAACTGTTCCTGGAGGAGCCGCGGGACGCCAAAACCAGCCAATGGGAAGCG	CCGGGCTTGGTGAGGAACTGTTCCTGGAGGAGACGCGGGACGCCAAAACCAGCCAATGGGAAGCG
m5C	chr9:84604294(+)	BS-Seq (High)	Human	AL157886.1	rs1211683816	chr9:84604293..84604294	dbSNP153			GACATTTCTTTTCTGCTTTTATTTTTCTTCCTCTTTTTTTCTTATTTCTTTTTTTCTTTCTTTTT	GACATTTCTTTTCTGCTTTTATTTTTCTTCCT_TTTTTTTCTTATTTCTTTTTTTCTTTCTTTTT
m5C	chr9:84604294(+)	BS-Seq (High)	Human	AL157886.1	rs925453889	chr9:84604294..84604294	dbSNP153			GACATTTCTTTTCTGCTTTTATTTTTCTTCCTCTTTTTTTCTTATTTCTTTTTTTCTTTCTTTTT	GACATTTCTTTTCTGCTTTTATTTTTCTTCCTGTTTTTTTCTTATTTCTTTTTTTCTTTCTTTTT
m5C	chr9:84604327(+)	BS-Seq (High)	Human	AL157886.1	rs914005533	chr9:84604315..84604327	dbSNP153			TTTTTTTCTTATTTCTTTTTTTCTTTCTTTTTCTCTTTTTTCTCCTCCTCCTCCTCTCCCTACTT	TTTTTTTCTTATTTCTTTTTT____________TCTTTTTTCTCCTCCTCCTCCTCTCCCTACTT
m5C	chr9:84604317(+)	BS-Seq (High)	Human	AL157886.1	rs1397866224	chr9:84604317..84604317	dbSNP153			TTTCTTCCTCTTTTTTTCTTATTTCTTTTTTTCTTTCTTTTTCTCTTTTTTCTCCTCCTCCTCCT	TTTCTTCCTCTTTTTTTCTTATTTCTTTTTTTTTTTCTTTTTCTCTTTTTTCTCCTCCTCCTCCT
m5C	chr9:84604329(+)	BS-Seq (High)	Human	AL157886.1	rs944005745	chr9:84604329..84604329	dbSNP153			TTTTTCTTATTTCTTTTTTTCTTTCTTTTTCTCTTTTTTCTCCTCCTCCTCCTCTCCCTACTTTC	TTTTTCTTATTTCTTTTTTTCTTTCTTTTTCTGTTTTTTCTCCTCCTCCTCCTCTCCCTACTTTC
m5C	chr9:84604338(+)	BS-Seq (High)	Human	AL157886.1	rs1306304664	chr9:84604335..84604338	dbSNP153			TTTCTTTTTTTCTTTCTTTTTCTCTTTTTTCTCCTCCTCCTCCTCTCCCTACTTTCCCTCCTCCT	TTTCTTTTTTTCTTTCTTTTTCTCTTTTTT___CTCCTCCTCCTCTCCCTACTTTCCCTCCTCCT
m5C	chr9:84604336(+)	BS-Seq (High)	Human	AL157886.1	rs1347600302	chr9:84604336..84604336	dbSNP153			TATTTCTTTTTTTCTTTCTTTTTCTCTTTTTTCTCCTCCTCCTCCTCTCCCTACTTTCCCTCCTC	TATTTCTTTTTTTCTTTCTTTTTCTCTTTTTTTTCCTCCTCCTCCTCTCCCTACTTTCCCTCCTC
m5C	chr9:84604347(+)	BS-Seq (High)	Human	AL157886.1	rs1461141750	chr9:84604347..84604347	dbSNP153			TTCTTTCTTTTTCTCTTTTTTCTCCTCCTCCTCCTCTCCCTACTTTCCCTCCTCCTCCTTCTTCT	TTCTTTCTTTTTCTCTTTTTTCTCCTCCTCCTTCTCTCCCTACTTTCCCTCCTCCTCCTTCTTCT
m5C	chr9:84604361(+)	BS-Seq (High)	Human	AL157886.1	rs1486708545	chr9:84604361..84604361	dbSNP153			CTTTTTTCTCCTCCTCCTCCTCTCCCTACTTTCCCTCCTCCTCCTTCTTCTTTTCTTCTTCCTCT	CTTTTTTCTCCTCCTCCTCCTCTCCCTACTTTTCCTCCTCCTCCTTCTTCTTTTCTTCTTCCTCT
m5C	chr9:84604365(+)	BS-Seq (High)	Human	AL157886.1	rs1563967099	chr9:84604365..84604365	dbSNP153			TTTCTCCTCCTCCTCCTCTCCCTACTTTCCCTCCTCCTCCTTCTTCTTTTCTTCTTCCTCTTCTT	TTTCTCCTCCTCCTCCTCTCCCTACTTTCCCTGCTCCTCCTTCTTCTTTTCTTCTTCCTCTTCTT
m5C	chr9:84604375(+)	BS-Seq (High)	Human	AL157886.1	rs767170300	chr9:84604375..84604375	dbSNP153			TCCTCCTCTCCCTACTTTCCCTCCTCCTCCTTCTTCTTTTCTTCTTCCTCTTCTTCTTCCTCTTC	TCCTCCTCTCCCTACTTTCCCTCCTCCTCCTTATTCTTTTCTTCTTCCTCTTCTTCTTCCTCTTC
m5C	chr9:84604375(+)	BS-Seq (High)	Human	AL157886.1	rs767170300	chr9:84604375..84604375	dbSNP153			TCCTCCTCTCCCTACTTTCCCTCCTCCTCCTTCTTCTTTTCTTCTTCCTCTTCTTCTTCCTCTTC	TCCTCCTCTCCCTACTTTCCCTCCTCCTCCTTTTTCTTTTCTTCTTCCTCTTCTTCTTCCTCTTC
m5C	chr9:84604383(+)	BS-Seq (High)	Human	AL157886.1	rs1563967142	chr9:84604380..84604383	dbSNP153			TCCCTACTTTCCCTCCTCCTCCTTCTTCTTTTCTTCTTCCTCTTCTTCTTCCTCTTCCTCCTCTT	TCCCTACTTTCCCTCCTCCTCCTTCTTCTT___TTCTTCCTCTTCTTCTTCCTCTTCCTCCTCTT
m5C	chr9:84604389(+)	BS-Seq (High)	Human	AL157886.1	rs1460220481	chr9:84604387..84604390	dbSNP153			CTTTCCCTCCTCCTCCTTCTTCTTTTCTTCTTCCTCTTCTTCTTCCTCTTCCTCCTCTTCTTCCT	CTTTCCCTCCTCCTCCTTCTTCTTTTCTTCT___TCTTCTTCTTCCTCTTCCTCCTCTTCTTCCT
m5C	chr9:110256623(-)	BS-Seq (High)	Human	lnc-C9orf152-4	rs1396851638	chr9:110256623..110256623	dbSNP153	RBP 1		CCGCCCCGATCCCGGCTCGCAGGCTCCAGGGGCGGGGCGTGGCCGGGGCGCAGCGACGGGCGCGG	CCGCCCCGATCCCGGCTCGCAGGCTCCAGGGGTGGGGCGTGGCCGGGGCGCAGCGACGGGCGCGG
m5C	chr9:110256649(-)	BS-Seq (High)	Human	lnc-C9orf152-4	rs1425117986	chr9:110256649..110256649	dbSNP153			AGCTCCGCCCCACGCTTGCGCCAGCCCCGCCCCGATCCCGGCTCGCAGGCTCCAGGGGCGGGGCG	AGCTCCGCCCCACGCTTGCGCCAGCCCCGCCCGGATCCCGGCTCGCAGGCTCCAGGGGCGGGGCG
m5C	chr9:110256650(-)	BS-Seq (High)	Human	lnc-C9orf152-4	rs1256679929	chr9:110256650..110256650	dbSNP153			GAGCTCCGCCCCACGCTTGCGCCAGCCCCGCCCCGATCCCGGCTCGCAGGCTCCAGGGGCGGGGC	GAGCTCCGCCCCACGCTTGCGCCAGCCCCGCCTCGATCCCGGCTCGCAGGCTCCAGGGGCGGGGC
m5C	chr9:110256657(-)	BS-Seq (High)	Human	lnc-C9orf152-4	rs1274736710	chr9:110256657..110256657	dbSNP153			AGCCCTGGAGCTCCGCCCCACGCTTGCGCCAGCCCCGCCCCGATCCCGGCTCGCAGGCTCCAGGG	AGCCCTGGAGCTCCGCCCCACGCTTGCGCCAGTCCCGCCCCGATCCCGGCTCGCAGGCTCCAGGG
m5C	chr9:135908075(+)	BS-Seq (High)	Human	AL355574.1	rs111615730	chr9:135908075..135908075	dbSNP153	RBP 2		CGCCCTGGGGACCTCGTGGGTGTGGCCGGCGGCGACCTCGGCAGGCGACAGCCCAGCAGACGGGC	CGCCCTGGGGACCTCGTGGGTGTGGCCGGCGGTGACCTCGGCAGGCGACAGCCCAGCAGACGGGC
m5C	chr9:136728120(-)	BS-Seq (High)	Human	SNHG7	rs1025393278	chr9:136728120..136728120	dbSNP153	RBP 18 miRNA 3		GGGCCGCCTGACTTCTCCTCCCGGCCAGTTCTCGAGCGCCTCACCGGGCCTCGCCCTGCAGCCTC	GGGCCGCCTGACTTCTCCTCCCGGCCAGTTCTTGAGCGCCTCACCGGGCCTCGCCCTGCAGCCTC
m5C	chr9:136728120(-)	BS-Seq (High)	Human	SNHG7	rs1025393278	chr9:136728120..136728120	dbSNP153	RBP 18 miRNA 3		GGGCCGCCTGACTTCTCCTCCCGGCCAGTTCTCGAGCGCCTCACCGGGCCTCGCCCTGCAGCCTC	GGGCCGCCTGACTTCTCCTCCCGGCCAGTTCTGGAGCGCCTCACCGGGCCTCGCCCTGCAGCCTC
m5C	chr9:136728127(-)	BS-Seq (High)	Human	SNHG7	rs530862580	chr9:136728127..136728127	dbSNP153	RBP 19 miRNA 5		GGCGGGTGGGCCGCCTGACTTCTCCTCCCGGCCAGTTCTCGAGCGCCTCACCGGGCCTCGCCCTG	GGCGGGTGGGCCGCCTGACTTCTCCTCCCGGCTAGTTCTCGAGCGCCTCACCGGGCCTCGCCCTG
m5C	chr9:136728127(-)	BS-Seq (High)	Human	SNHG7	rs530862580	chr9:136728127..136728127	dbSNP153	RBP 19 miRNA 5		GGCGGGTGGGCCGCCTGACTTCTCCTCCCGGCCAGTTCTCGAGCGCCTCACCGGGCCTCGCCCTG	GGCGGGTGGGCCGCCTGACTTCTCCTCCCGGCGAGTTCTCGAGCGCCTCACCGGGCCTCGCCCTG
m5C	chr9:136802384(-)	BS-Seq (High)	Human	CCDC183-AS1,CCDC183-AS1:2,CCDC183-AS1:3,CCDC183-AS1:4,CCDC183-AS1:5,CCDC183-AS1:6,CCDC183-AS1:7,CCDC183-AS1:8,CCDC183-AS1:9	rs1035189310	chr9:136802384..136802384	dbSNP153	RBP 1		GAAATGCTCTGCAGAAAAGGCTGACTGAAACCCGGGGAGGTTTGGGGACAGTTCTGCTTTGAAGT	GAAATGCTCTGCAGAAAAGGCTGACTGAAACCTGGGGAGGTTTGGGGACAGTTCTGCTTTGAAGT
m5C	chr9:136802384(-)	BS-Seq (High)	Human	CCDC183-AS1,CCDC183-AS1:2,CCDC183-AS1:3,CCDC183-AS1:4,CCDC183-AS1:5,CCDC183-AS1:6,CCDC183-AS1:7,CCDC183-AS1:8,CCDC183-AS1:9	rs1035189310	chr9:136802384..136802384	dbSNP153	RBP 1		GAAATGCTCTGCAGAAAAGGCTGACTGAAACCCGGGGAGGTTTGGGGACAGTTCTGCTTTGAAGT	GAAATGCTCTGCAGAAAAGGCTGACTGAAACCGGGGGAGGTTTGGGGACAGTTCTGCTTTGAAGT
m5C	chr9:136802811(-)	BS-Seq (High)	Human	CCDC183-AS1,CCDC183-AS1:2,CCDC183-AS1:3,CCDC183-AS1:4,CCDC183-AS1:5,CCDC183-AS1:6,CCDC183-AS1:7,CCDC183-AS1:8,CCDC183-AS1:9	rs1564349809	chr9:136802806..136802812	dbSNP153			CCGAAGATCCAAGAGGGCTGGCCCTGGGGGGCCCCCAGCCCTGGGCCCTGAGCTCACCTTGACCT	CCGAAGATCCAAGAGGGCTGGCCCTGGGGGG______GCCCTGGGCCCTGAGCTCACCTTGACCT
m5C	chr9:136802812(-)	BS-Seq (High)	Human	CCDC183-AS1,CCDC183-AS1:2,CCDC183-AS1:3,CCDC183-AS1:4,CCDC183-AS1:5,CCDC183-AS1:6,CCDC183-AS1:7,CCDC183-AS1:8,CCDC183-AS1:9	rs1564349809	chr9:136802806..136802812	dbSNP153			TCCGAAGATCCAAGAGGGCTGGCCCTGGGGGGCCCCCAGCCCTGGGCCCTGAGCTCACCTTGACC	TCCGAAGATCCAAGAGGGCTGGCCCTGGGGGG______GCCCTGGGCCCTGAGCTCACCTTGACC
m5C	chr9:136802808(-)	BS-Seq (High)	Human	CCDC183-AS1,CCDC183-AS1:2,CCDC183-AS1:3,CCDC183-AS1:4,CCDC183-AS1:5,CCDC183-AS1:6,CCDC183-AS1:7,CCDC183-AS1:8,CCDC183-AS1:9	rs770930945	chr9:136802807..136802808	dbSNP153			AAGATCCAAGAGGGCTGGCCCTGGGGGGCCCCCAGCCCTGGGCCCTGAGCTCACCTTGACCTCAT	AAGATCCAAGAGGGCTGGCCCTGGGGGGCCCC_AGCCCTGGGCCCTGAGCTCACCTTGACCTCAT
m5C	chr9:136802808(-)	BS-Seq (High)	Human	CCDC183-AS1,CCDC183-AS1:2,CCDC183-AS1:3,CCDC183-AS1:4,CCDC183-AS1:5,CCDC183-AS1:6,CCDC183-AS1:7,CCDC183-AS1:8,CCDC183-AS1:9	rs752331775	chr9:136802808..136802808	dbSNP153			AAGATCCAAGAGGGCTGGCCCTGGGGGGCCCCCAGCCCTGGGCCCTGAGCTCACCTTGACCTCAT	AAGATCCAAGAGGGCTGGCCCTGGGGGGCCCCTAGCCCTGGGCCCTGAGCTCACCTTGACCTCAT
m5C	chr9:136802808(-)	BS-Seq (High)	Human	CCDC183-AS1,CCDC183-AS1:2,CCDC183-AS1:3,CCDC183-AS1:4,CCDC183-AS1:5,CCDC183-AS1:6,CCDC183-AS1:7,CCDC183-AS1:8,CCDC183-AS1:9	rs752331775	chr9:136802808..136802808	dbSNP153			AAGATCCAAGAGGGCTGGCCCTGGGGGGCCCCCAGCCCTGGGCCCTGAGCTCACCTTGACCTCAT	AAGATCCAAGAGGGCTGGCCCTGGGGGGCCCCGAGCCCTGGGCCCTGAGCTCACCTTGACCTCAT
m5C	chr9:136802808(-)	BS-Seq (High)	Human	CCDC183-AS1,CCDC183-AS1:2,CCDC183-AS1:3,CCDC183-AS1:4,CCDC183-AS1:5,CCDC183-AS1:6,CCDC183-AS1:7,CCDC183-AS1:8,CCDC183-AS1:9	rs752331775	chr9:136802808..136802808	dbSNP153			AAGATCCAAGAGGGCTGGCCCTGGGGGGCCCCCAGCCCTGGGCCCTGAGCTCACCTTGACCTCAT	AAGATCCAAGAGGGCTGGCCCTGGGGGGCCCCAAGCCCTGGGCCCTGAGCTCACCTTGACCTCAT
m5C	chr9:136802809(-)	BS-Seq (High)	Human	CCDC183-AS1,CCDC183-AS1:2,CCDC183-AS1:3,CCDC183-AS1:4,CCDC183-AS1:5,CCDC183-AS1:6,CCDC183-AS1:7,CCDC183-AS1:8,CCDC183-AS1:9	rs200690071	chr9:136802809..136802809	dbSNP153			GAAGATCCAAGAGGGCTGGCCCTGGGGGGCCCCCAGCCCTGGGCCCTGAGCTCACCTTGACCTCA	GAAGATCCAAGAGGGCTGGCCCTGGGGGGCCCTCAGCCCTGGGCCCTGAGCTCACCTTGACCTCA
m5C	chr9:136802810(-)	BS-Seq (High)	Human	CCDC183-AS1,CCDC183-AS1:2,CCDC183-AS1:3,CCDC183-AS1:4,CCDC183-AS1:5,CCDC183-AS1:6,CCDC183-AS1:7,CCDC183-AS1:8,CCDC183-AS1:9	rs1046963700	chr9:136802810..136802810	dbSNP153			CGAAGATCCAAGAGGGCTGGCCCTGGGGGGCCCCCAGCCCTGGGCCCTGAGCTCACCTTGACCTC	CGAAGATCCAAGAGGGCTGGCCCTGGGGGGCCTCCAGCCCTGGGCCCTGAGCTCACCTTGACCTC
m5C	chr9:136802812(-)	BS-Seq (High)	Human	CCDC183-AS1,CCDC183-AS1:2,CCDC183-AS1:3,CCDC183-AS1:4,CCDC183-AS1:5,CCDC183-AS1:6,CCDC183-AS1:7,CCDC183-AS1:8,CCDC183-AS1:9	rs1491336417	chr9:136802811..136802813	dbSNP153			TCCGAAGATCCAAGAGGGCTGGCCCTGGGGGGCCCCCAGCCCTGGGCCCTGAGCTCACCTTGACC	TCCGAAGATCCAAGAGGGCTGGCCCTGGGGG__CCCCAGCCCTGGGCCCTGAGCTCACCTTGACC
m5C	chr9:136802811(-)	BS-Seq (High)	Human	CCDC183-AS1,CCDC183-AS1:2,CCDC183-AS1:3,CCDC183-AS1:4,CCDC183-AS1:5,CCDC183-AS1:6,CCDC183-AS1:7,CCDC183-AS1:8,CCDC183-AS1:9	rs905278860	chr9:136802811..136802811	dbSNP153			CCGAAGATCCAAGAGGGCTGGCCCTGGGGGGCCCCCAGCCCTGGGCCCTGAGCTCACCTTGACCT	CCGAAGATCCAAGAGGGCTGGCCCTGGGGGGCGCCCAGCCCTGGGCCCTGAGCTCACCTTGACCT
m5C	chr9:136802811(-)	BS-Seq (High)	Human	CCDC183-AS1,CCDC183-AS1:2,CCDC183-AS1:3,CCDC183-AS1:4,CCDC183-AS1:5,CCDC183-AS1:6,CCDC183-AS1:7,CCDC183-AS1:8,CCDC183-AS1:9	rs905278860	chr9:136802811..136802811	dbSNP153			CCGAAGATCCAAGAGGGCTGGCCCTGGGGGGCCCCCAGCCCTGGGCCCTGAGCTCACCTTGACCT	CCGAAGATCCAAGAGGGCTGGCCCTGGGGGGCACCCAGCCCTGGGCCCTGAGCTCACCTTGACCT
m5C	chr9:136802812(-)	BS-Seq (High)	Human	CCDC183-AS1,CCDC183-AS1:2,CCDC183-AS1:3,CCDC183-AS1:4,CCDC183-AS1:5,CCDC183-AS1:6,CCDC183-AS1:7,CCDC183-AS1:8,CCDC183-AS1:9	rs777698499	chr9:136802812..136802812	dbSNP153			TCCGAAGATCCAAGAGGGCTGGCCCTGGGGGGCCCCCAGCCCTGGGCCCTGAGCTCACCTTGACC	TCCGAAGATCCAAGAGGGCTGGCCCTGGGGGGTCCCCAGCCCTGGGCCCTGAGCTCACCTTGACC
m5C	chr9:136802812(-)	BS-Seq (High)	Human	CCDC183-AS1,CCDC183-AS1:2,CCDC183-AS1:3,CCDC183-AS1:4,CCDC183-AS1:5,CCDC183-AS1:6,CCDC183-AS1:7,CCDC183-AS1:8,CCDC183-AS1:9	rs777698499	chr9:136802812..136802812	dbSNP153			TCCGAAGATCCAAGAGGGCTGGCCCTGGGGGGCCCCCAGCCCTGGGCCCTGAGCTCACCTTGACC	TCCGAAGATCCAAGAGGGCTGGCCCTGGGGGGGCCCCAGCCCTGGGCCCTGAGCTCACCTTGACC
m5C	chr9:136802812(-)	BS-Seq (High)	Human	CCDC183-AS1,CCDC183-AS1:2,CCDC183-AS1:3,CCDC183-AS1:4,CCDC183-AS1:5,CCDC183-AS1:6,CCDC183-AS1:7,CCDC183-AS1:8,CCDC183-AS1:9	rs777698499	chr9:136802812..136802812	dbSNP153			TCCGAAGATCCAAGAGGGCTGGCCCTGGGGGGCCCCCAGCCCTGGGCCCTGAGCTCACCTTGACC	TCCGAAGATCCAAGAGGGCTGGCCCTGGGGGGACCCCAGCCCTGGGCCCTGAGCTCACCTTGACC
m5C	chr9:136802880(-)	BS-Seq (High)	Human	CCDC183-AS1,CCDC183-AS1:2,CCDC183-AS1:3,CCDC183-AS1:4,CCDC183-AS1:5,CCDC183-AS1:6,CCDC183-AS1:7,CCDC183-AS1:8,CCDC183-AS1:9	rs1564349879	chr9:136802874..136802880	dbSNP153			TCCGAAGATCCAAGAGGGCTGGCCCTGGGGGGCCCCCAGCCCTGGGCCCTGAGCTCACCTTGACC	TCCGAAGATCCAAGAGGGCTGGCCCTGGGGGG______GCCCTGGGCCCTGAGCTCACCTTGACC
m5C	chr9:136802879(-)	BS-Seq (High)	Human	CCDC183-AS1,CCDC183-AS1:2,CCDC183-AS1:3,CCDC183-AS1:4,CCDC183-AS1:5,CCDC183-AS1:6,CCDC183-AS1:7,CCDC183-AS1:8,CCDC183-AS1:9	rs1564349879	chr9:136802874..136802880	dbSNP153			CCGAAGATCCAAGAGGGCTGGCCCTGGGGGGCCCCCAGCCCTGGGCCCTGAGCTCACCTTGACCC	CCGAAGATCCAAGAGGGCTGGCCCTGGGGGG______GCCCTGGGCCCTGAGCTCACCTTGACCC
m5C	chr9:136802876(-)	BS-Seq (High)	Human	CCDC183-AS1,CCDC183-AS1:2,CCDC183-AS1:3,CCDC183-AS1:4,CCDC183-AS1:5,CCDC183-AS1:6,CCDC183-AS1:7,CCDC183-AS1:8,CCDC183-AS1:9	rs1245896910	chr9:136802875..136802876	dbSNP153			AAGATCCAAGAGGGCTGGCCCTGGGGGGCCCCCAGCCCTGGGCCCTGAGCTCACCTTGACCCCAT	AAGATCCAAGAGGGCTGGCCCTGGGGGGCCCC_AGCCCTGGGCCCTGAGCTCACCTTGACCCCAT
m5C	chr9:136802876(-)	BS-Seq (High)	Human	CCDC183-AS1,CCDC183-AS1:2,CCDC183-AS1:3,CCDC183-AS1:4,CCDC183-AS1:5,CCDC183-AS1:6,CCDC183-AS1:7,CCDC183-AS1:8,CCDC183-AS1:9	rs1421974042	chr9:136802876..136802876	dbSNP153			AAGATCCAAGAGGGCTGGCCCTGGGGGGCCCCCAGCCCTGGGCCCTGAGCTCACCTTGACCCCAT	AAGATCCAAGAGGGCTGGCCCTGGGGGGCCCCTAGCCCTGGGCCCTGAGCTCACCTTGACCCCAT
m5C	chr9:136802876(-)	BS-Seq (High)	Human	CCDC183-AS1,CCDC183-AS1:2,CCDC183-AS1:3,CCDC183-AS1:4,CCDC183-AS1:5,CCDC183-AS1:6,CCDC183-AS1:7,CCDC183-AS1:8,CCDC183-AS1:9	rs1421974042	chr9:136802876..136802876	dbSNP153			AAGATCCAAGAGGGCTGGCCCTGGGGGGCCCCCAGCCCTGGGCCCTGAGCTCACCTTGACCCCAT	AAGATCCAAGAGGGCTGGCCCTGGGGGGCCCCGAGCCCTGGGCCCTGAGCTCACCTTGACCCCAT
m5C	chr9:136802878(-)	BS-Seq (High)	Human	CCDC183-AS1,CCDC183-AS1:2,CCDC183-AS1:3,CCDC183-AS1:4,CCDC183-AS1:5,CCDC183-AS1:6,CCDC183-AS1:7,CCDC183-AS1:8,CCDC183-AS1:9	rs1162848714	chr9:136802878..136802878	dbSNP153			CGAAGATCCAAGAGGGCTGGCCCTGGGGGGCCCCCAGCCCTGGGCCCTGAGCTCACCTTGACCCC	CGAAGATCCAAGAGGGCTGGCCCTGGGGGGCCTCCAGCCCTGGGCCCTGAGCTCACCTTGACCCC
m5C	chr9:136802944(-)	BS-Seq (High)	Human	CCDC183-AS1,CCDC183-AS1:2,CCDC183-AS1:3,CCDC183-AS1:4,CCDC183-AS1:5,CCDC183-AS1:6,CCDC183-AS1:7,CCDC183-AS1:8,CCDC183-AS1:9	rs1564349890	chr9:136802881..136802944	dbSNP153			AAGATCCAAGAGGGCTGGCCCTGGGGGGCCCCCGGCCCTGGGCCCTGAGCTCACCTTGACCCCAT	AAGATCCAAGAGGGCTGGCCCTGGGGGGCCCC_________________________________
m5C	chr9:136802944(-)	BS-Seq (High)	Human	CCDC183-AS1,CCDC183-AS1:2,CCDC183-AS1:3,CCDC183-AS1:4,CCDC183-AS1:5,CCDC183-AS1:6,CCDC183-AS1:7,CCDC183-AS1:8,CCDC183-AS1:9	rs66759913	chr9:136802943..136802944	dbSNP153			AAGATCCAAGAGGGCTGGCCCTGGGGGGCCCCCGGCCCTGGGCCCTGAGCTCACCTTGACCCCAT	AAGATCCAAGAGGGCTGGCCCTGGGGGGCCCC_GGCCCTGGGCCCTGAGCTCACCTTGACCCCAT
m5C	chr9:136802944(-)	BS-Seq (High)	Human	CCDC183-AS1,CCDC183-AS1:2,CCDC183-AS1:3,CCDC183-AS1:4,CCDC183-AS1:5,CCDC183-AS1:6,CCDC183-AS1:7,CCDC183-AS1:8,CCDC183-AS1:9	rs878953924	chr9:136802944..136802944	dbSNP153			AAGATCCAAGAGGGCTGGCCCTGGGGGGCCCCCGGCCCTGGGCCCTGAGCTCACCTTGACCCCAT	AAGATCCAAGAGGGCTGGCCCTGGGGGGCCCCTGGCCCTGGGCCCTGAGCTCACCTTGACCCCAT
m5C	chr9:136802944(-)	BS-Seq (High)	Human	CCDC183-AS1,CCDC183-AS1:2,CCDC183-AS1:3,CCDC183-AS1:4,CCDC183-AS1:5,CCDC183-AS1:6,CCDC183-AS1:7,CCDC183-AS1:8,CCDC183-AS1:9	rs878953924	chr9:136802944..136802944	dbSNP153			AAGATCCAAGAGGGCTGGCCCTGGGGGGCCCCCGGCCCTGGGCCCTGAGCTCACCTTGACCCCAT	AAGATCCAAGAGGGCTGGCCCTGGGGGGCCCCAGGCCCTGGGCCCTGAGCTCACCTTGACCCCAT
m5C	chr9:136803012(-)	BS-Seq (High)	Human	CCDC183-AS1,CCDC183-AS1:2,CCDC183-AS1:3,CCDC183-AS1:4,CCDC183-AS1:5,CCDC183-AS1:6,CCDC183-AS1:7,CCDC183-AS1:8,CCDC183-AS1:9	rs775616087	chr9:136803011..136803012	dbSNP153			AAGATCCAAGAGGGCTGGCCCTGGGGGGCCCCCAGCCCTGGGCCCTGAGCTCACCTTGACCCCAT	AAGATCCAAGAGGGCTGGCCCTGGGGGGCCCC_AGCCCTGGGCCCTGAGCTCACCTTGACCCCAT
m5C	chr9:136803012(-)	BS-Seq (High)	Human	CCDC183-AS1,CCDC183-AS1:2,CCDC183-AS1:3,CCDC183-AS1:4,CCDC183-AS1:5,CCDC183-AS1:6,CCDC183-AS1:7,CCDC183-AS1:8,CCDC183-AS1:9	rs1482237265	chr9:136803012..136803012	dbSNP153			AAGATCCAAGAGGGCTGGCCCTGGGGGGCCCCCAGCCCTGGGCCCTGAGCTCACCTTGACCCCAT	AAGATCCAAGAGGGCTGGCCCTGGGGGGCCCCTAGCCCTGGGCCCTGAGCTCACCTTGACCCCAT
m5C	chr9:136803012(-)	BS-Seq (High)	Human	CCDC183-AS1,CCDC183-AS1:2,CCDC183-AS1:3,CCDC183-AS1:4,CCDC183-AS1:5,CCDC183-AS1:6,CCDC183-AS1:7,CCDC183-AS1:8,CCDC183-AS1:9	rs1482237265	chr9:136803012..136803012	dbSNP153			AAGATCCAAGAGGGCTGGCCCTGGGGGGCCCCCAGCCCTGGGCCCTGAGCTCACCTTGACCCCAT	AAGATCCAAGAGGGCTGGCCCTGGGGGGCCCCGAGCCCTGGGCCCTGAGCTCACCTTGACCCCAT
m5C	chr9:136803080(-)	BS-Seq (High)	Human	CCDC183-AS1,CCDC183-AS1:2,CCDC183-AS1:3,CCDC183-AS1:4,CCDC183-AS1:5,CCDC183-AS1:6,CCDC183-AS1:7,CCDC183-AS1:8,CCDC183-AS1:9	rs67636182	chr9:136803079..136803080	dbSNP153			AAGATCCAAGAGGGCTGGCCCTGGGGGGCCCCCGGCCCTGGGCCCTGAGCTCACCTTGACCCCAT	AAGATCCAAGAGGGCTGGCCCTGGGGGGCCCC_GGCCCTGGGCCCTGAGCTCACCTTGACCCCAT
m5C	chr9:136803080(-)	BS-Seq (High)	Human	CCDC183-AS1,CCDC183-AS1:2,CCDC183-AS1:3,CCDC183-AS1:4,CCDC183-AS1:5,CCDC183-AS1:6,CCDC183-AS1:7,CCDC183-AS1:8,CCDC183-AS1:9	rs1329713154	chr9:136803080..136803080	dbSNP153			AAGATCCAAGAGGGCTGGCCCTGGGGGGCCCCCGGCCCTGGGCCCTGAGCTCACCTTGACCCCAT	AAGATCCAAGAGGGCTGGCCCTGGGGGGCCCCTGGCCCTGGGCCCTGAGCTCACCTTGACCCCAT
m5C	chr9:136803084(-)	BS-Seq (High)	Human	CCDC183-AS1,CCDC183-AS1:2,CCDC183-AS1:3,CCDC183-AS1:4,CCDC183-AS1:5,CCDC183-AS1:6,CCDC183-AS1:7,CCDC183-AS1:8,CCDC183-AS1:9	rs1317922941	chr9:136803084..136803084	dbSNP153			TCCGAAGATCCAAGAGGGCTGGCCCTGGGGGGCCCCCGGCCCTGGGCCCTGAGCTCACCTTGACC	TCCGAAGATCCAAGAGGGCTGGCCCTGGGGGGGCCCCGGCCCTGGGCCCTGAGCTCACCTTGACC
m5C	chr9:136803150(-)	BS-Seq (High)	Human	CCDC183-AS1,CCDC183-AS1:2,CCDC183-AS1:3,CCDC183-AS1:4,CCDC183-AS1:5,CCDC183-AS1:6,CCDC183-AS1:7,CCDC183-AS1:8,CCDC183-AS1:9	rs1564350035	chr9:136803146..136803151	dbSNP153			CCGAAGATCCAAGAGGGCTGGCCCTGGGGGGCCCCAGCCCTGGGCCCTGAGCTCACCTTGACCCC	CCGAAGATCCAAGAGGGCTGGCCCTGGGGGG_____GCCCTGGGCCCTGAGCTCACCTTGACCCC
m5C	chr9:136803151(-)	BS-Seq (High)	Human	CCDC183-AS1,CCDC183-AS1:2,CCDC183-AS1:3,CCDC183-AS1:4,CCDC183-AS1:5,CCDC183-AS1:6,CCDC183-AS1:7,CCDC183-AS1:8,CCDC183-AS1:9	rs1564350035	chr9:136803146..136803151	dbSNP153			TCCGAAGATCCAAGAGGGCTGGCCCTGGGGGGCCCCAGCCCTGGGCCCTGAGCTCACCTTGACCC	TCCGAAGATCCAAGAGGGCTGGCCCTGGGGGG_____GCCCTGGGCCCTGAGCTCACCTTGACCC
m5C	chr9:136803148(-)	BS-Seq (High)	Human	CCDC183-AS1,CCDC183-AS1:2,CCDC183-AS1:3,CCDC183-AS1:4,CCDC183-AS1:5,CCDC183-AS1:6,CCDC183-AS1:7,CCDC183-AS1:8,CCDC183-AS1:9	rs1219992978	chr9:136803148..136803148	dbSNP153	RBP 1		GAAGATCCAAGAGGGCTGGCCCTGGGGGGCCCCAGCCCTGGGCCCTGAGCTCACCTTGACCCCAT	GAAGATCCAAGAGGGCTGGCCCTGGGGGGCCCTAGCCCTGGGCCCTGAGCTCACCTTGACCCCAT
m5C	chr9:136803150(-)	BS-Seq (High)	Human	CCDC183-AS1,CCDC183-AS1:2,CCDC183-AS1:3,CCDC183-AS1:4,CCDC183-AS1:5,CCDC183-AS1:6,CCDC183-AS1:7,CCDC183-AS1:8,CCDC183-AS1:9	rs1334708298	chr9:136803150..136803150	dbSNP153			CCGAAGATCCAAGAGGGCTGGCCCTGGGGGGCCCCAGCCCTGGGCCCTGAGCTCACCTTGACCCC	CCGAAGATCCAAGAGGGCTGGCCCTGGGGGGCTCCAGCCCTGGGCCCTGAGCTCACCTTGACCCC
m5C	chr9:136803151(-)	BS-Seq (High)	Human	CCDC183-AS1,CCDC183-AS1:2,CCDC183-AS1:3,CCDC183-AS1:4,CCDC183-AS1:5,CCDC183-AS1:6,CCDC183-AS1:7,CCDC183-AS1:8,CCDC183-AS1:9	rs1294453124	chr9:136803151..136803151	dbSNP153			TCCGAAGATCCAAGAGGGCTGGCCCTGGGGGGCCCCAGCCCTGGGCCCTGAGCTCACCTTGACCC	TCCGAAGATCCAAGAGGGCTGGCCCTGGGGGGTCCCAGCCCTGGGCCCTGAGCTCACCTTGACCC
m5C	chr9:136807544(-)	BS-Seq (High)	Human	CCDC183-AS1	rs770047231	chr9:136807544..136807544	dbSNP153	circRNA 2		GGTGTCTGCGGGCGGAGGCGGCGGCTCGCACACGGGGCTAGCCCAGCTAGGCGCAGCCGCCCGAC	GGTGTCTGCGGGCGGAGGCGGCGGCTCGCACATGGGGCTAGCCCAGCTAGGCGCAGCCGCCCGAC
m5C	chr9:136807544(-)	BS-Seq (High)	Human	CCDC183-AS1	rs770047231	chr9:136807544..136807544	dbSNP153	circRNA 2		GGTGTCTGCGGGCGGAGGCGGCGGCTCGCACACGGGGCTAGCCCAGCTAGGCGCAGCCGCCCGAC	GGTGTCTGCGGGCGGAGGCGGCGGCTCGCACAGGGGGCTAGCCCAGCTAGGCGCAGCCGCCCGAC
m5C	chr9:136807939(+)	BS-Seq (High)	Human	AL355987.4,AL355987.2	rs925065199	chr9:136807939..136807939	dbSNP153	RBP 3 circRNA 2		CCGTAGCCGCGCACCCCTCCCGTCCCGCCGAGCCGGCGCCAAGATGGCGGCGCTGACTCCTGGAG	CCGTAGCCGCGCACCCCTCCCGTCCCGCCGAGTCGGCGCCAAGATGGCGGCGCTGACTCCTGGAG
m5C	chr9:136808004(+)	BS-Seq (High)	Human	AL355987.4,AL355987.2,RABL6	rs1379581014	chr9:136808004..136808004	dbSNP153	RBP 15 circRNA 2		AGCGGTCGCGCCGGAGGCCGCGGGGGCCGGAGCGGAGCAGCCGCGGCTGAGGTTCCCGAGTCGCC	AGCGGTCGCGCCGGAGGCCGCGGGGGCCGGAGGGGAGCAGCCGCGGCTGAGGTTCCCGAGTCGCC
m5C	chr9:136808026(+)	BS-Seq (High)	Human	AL355987.4,AL355987.2,RABL6	rs985228219	chr9:136808026..136808026	dbSNP153	RBP 10 circRNA 2		GGGGCCGGAGCGGAGCAGCCGCGGCTGAGGTTCCCGAGTCGCCGCTCGGGGCTGCGCTCCGCCGC	GGGGCCGGAGCGGAGCAGCCGCGGCTGAGGTTGCCGAGTCGCCGCTCGGGGCTGCGCTCCGCCGC
m5C	chr9:136808064(+)	BS-Seq (High)	Human	AL355987.4,AL355987.2,RABL6	rs1418638435	chr9:136808064..136808064	dbSNP153	RBP 10 circRNA 2		TCGCCGCTCGGGGCTGCGCTCCGCCGCCGGGACCCCGGCCTCTGGCCGCGCCGGCTCCGGCCTCC	TCGCCGCTCGGGGCTGCGCTCCGCCGCCGGGATCCCGGCCTCTGGCCGCGCCGGCTCCGGCCTCC
m5C	chr9:136808065(+)	BS-Seq (High)	Human	AL355987.4,AL355987.2,RABL6	rs984555337	chr9:136808065..136808065	dbSNP153	RBP 10 circRNA 2		CGCCGCTCGGGGCTGCGCTCCGCCGCCGGGACCCCGGCCTCTGGCCGCGCCGGCTCCGGCCTCCG	CGCCGCTCGGGGCTGCGCTCCGCCGCCGGGACGCCGGCCTCTGGCCGCGCCGGCTCCGGCCTCCG
m5C	chr9:136808086(+)	BS-Seq (High)	Human	AL355987.4,AL355987.2,RABL6	rs1178519433	chr9:136808065..136808087	dbSNP153	RBP 9 circRNA 2		GCCGCCGGGACCCCGGCCTCTGGCCGCGCCGGCTCCGGCCTCCGGGGGGGCCGGGGCCGCCGGGA	GCCGCCGGGACC______________________CCGGCCTCCGGGGGGGCCGGGGCCGCCGGGA
m5C	chr9:136808110(+)	BS-Seq (High)	Human	AL355987.4,AL355987.2,RABL6	rs1237077500	chr9:136808079..136808110	dbSNP153	RBP 8 circRNA 2		CGCGCCGGCTCCGGCCTCCGGGGGGGCCGGGGCCGCCGGGACATGGTGCCAGTCGCACCCCTTCC	CG_______________________________CGCCGGGACATGGTGCCAGTCGCACCCCTTCC
m5C	chr9:136808088(+)	BS-Seq (High)	Human	AL355987.4,AL355987.2,RABL6	rs1483795609	chr9:136808088..136808088	dbSNP153	RBP 8 circRNA 2		CGCCGGGACCCCGGCCTCTGGCCGCGCCGGCTCCGGCCTCCGGGGGGGCCGGGGCCGCCGGGACA	CGCCGGGACCCCGGCCTCTGGCCGCGCCGGCTTCGGCCTCCGGGGGGGCCGGGGCCGCCGGGACA
m5C	chr9:136836324(-)	BS-Seq (High)	Human	CCDC183-AS1	rs759593295	chr9:136836324..136836324	dbSNP153	RBP 1		GAACGGGCCAGCTGTCCCACTGGCCGCAACCCCGGGGCTATGCACTGCCCAGGCCCACTCAGGAG	GAACGGGCCAGCTGTCCCACTGGCCGCAACCCTGGGGCTATGCACTGCCCAGGCCCACTCAGGAG
m5C	chr9:136836960(-)	BS-Seq (High)	Human	CCDC183-AS1	rs1035340618	chr9:136836960..136836960	dbSNP153			CTGAGGCAGGAGAATGGCGTGAACCCGGGAGGCGGAGCTTGCGGTGAGCCGAGATCACACCACTG	CTGAGGCAGGAGAATGGCGTGAACCCGGGAGGTGGAGCTTGCGGTGAGCCGAGATCACACCACTG
m5C	chr9:136836960(-)	BS-Seq (High)	Human	CCDC183-AS1	rs1035340618	chr9:136836960..136836960	dbSNP153			CTGAGGCAGGAGAATGGCGTGAACCCGGGAGGCGGAGCTTGCGGTGAGCCGAGATCACACCACTG	CTGAGGCAGGAGAATGGCGTGAACCCGGGAGGGGGAGCTTGCGGTGAGCCGAGATCACACCACTG
m5C	chr9:136836986(-)	BS-Seq (High)	Human	CCDC183-AS1	rs988465173	chr9:136836986..136836986	dbSNP153			GCCTGTAGCCCCAGCTACTTGGGAGGCTGAGGCAGGAGAATGGCGTGAACCCGGGAGGCGGAGCT	GCCTGTAGCCCCAGCTACTTGGGAGGCTGAGGGAGGAGAATGGCGTGAACCCGGGAGGCGGAGCT
m5C	chr9:136840542(-)	BS-Seq (High)	Human	CCDC183-AS1	rs150248429	chr9:136840542..136840542	dbSNP153,HGVD			AGGCAGTGACAGGCACGCCCCCCGCCCCAGGGCGGCCACTGCCCACGCCGGCCTAGAGCTCCTCG	AGGCAGTGACAGGCACGCCCCCCGCCCCAGGGTGGCCACTGCCCACGCCGGCCTAGAGCTCCTCG
m5C	chr9:137615486(-)	BS-Seq (High)	Human	ARRDC1-AS1	rs1443672452	chr9:137615486..137615486	dbSNP153			GCTCCGCCCAGGCATGGTAGCCTGAGCGCGCCCCCAGGGTAGTAGGGGGCACCTGAGGAGCAGGG	GCTCCGCCCAGGCATGGTAGCCTGAGCGCGCCTCCAGGGTAGTAGGGGGCACCTGAGGAGCAGGG
m5C	chr9:137615488(-)	BS-Seq (High)	Human	ARRDC1-AS1	rs1376426820	chr9:137615488..137615488	dbSNP153			CGGCTCCGCCCAGGCATGGTAGCCTGAGCGCGCCCCCAGGGTAGTAGGGGGCACCTGAGGAGCAG	CGGCTCCGCCCAGGCATGGTAGCCTGAGCGCGTCCCCAGGGTAGTAGGGGGCACCTGAGGAGCAG
m5C	chr9:137616111(-)	BS-Seq (High)	Human	ARRDC1-AS1	rs1387264863	chr9:137616111..137616111	dbSNP153	RBP 1 Splice 3		ACCTGCCTCAGCCTCCCAAAGTACTGGGATTACAGGAGGGAGCCACCGTGCCCGGCCTGGTCCTG	ACCTGCCTCAGCCTCCCAAAGTACTGGGATTATAGGAGGGAGCCACCGTGCCCGGCCTGGTCCTG
m5C	chr9:137616131(-)	BS-Seq (High)	Human	ARRDC1-AS1	rs1170646058	chr9:137616131..137616131	dbSNP153	Splice 3		CTCCTGACCTCAAGCAATCCACCTGCCTCAGCCTCCCAAAGTACTGGGATTACAGGAGGGAGCCA	CTCCTGACCTCAAGCAATCCACCTGCCTCAGCATCCCAAAGTACTGGGATTACAGGAGGGAGCCA
m5C	chr9:124356079(+)	BS-Seq (High)	Human	LOC100129034,LOC100129034:2,LOC100129034:3	rs1456826172	chr9:124356079..124356079	dbSNP153			GCACTCAGGGAGCCCATCCTGACCTGCCCGGGCTCCCAGAAGAGGTCAGGAGCCACAGGATGGTC	GCACTCAGGGAGCCCATCCTGACCTGCCCGGGTTCCCAGAAGAGGTCAGGAGCCACAGGATGGTC
m5C	chr9:126145993(+)	miCLIP (High)	Human	AL589923.1	rs1232210570	chr9:126145992..126145993	dbSNP153			CACTCCAGCCTGGTGACAGAGCAAGATTCCGTCAAAAAAAAAAAAAACAAAAAAAAAACAATATG	CACTCCAGCCTGGTGACAGAGCAAGATTCCGT_AAAAAAAAAAAAAACAAAAAAAAAACAATATG
m5C	chr9:126145993(+)	miCLIP (High)	Human	AL589923.1	rs1334895180	chr9:126145993..126145993	dbSNP153			CACTCCAGCCTGGTGACAGAGCAAGATTCCGTCAAAAAAAAAAAAAACAAAAAAAAAACAATATG	CACTCCAGCCTGGTGACAGAGCAAGATTCCGTAAAAAAAAAAAAAAACAAAAAAAAAACAATATG
m5C	chr9:128115100(-)	BS-Seq (High)	Human	SLC25A25-AS1	rs949042657	chr9:128115100..128115100	dbSNP153	RBP 6 Splice 1 circRNA 4		CTCTCTGTGGCCTCCTGGCTGCGAGGAGGCAGCCAGGGACCAGGTGCCACCCTTCTGAGGTGAGG	CTCTCTGTGGCCTCCTGGCTGCGAGGAGGCAGACAGGGACCAGGTGCCACCCTTCTGAGGTGAGG
m5C	chr9:128115111(-)	BS-Seq (High)	Human	SLC25A25-AS1	rs191932098	chr9:128115111..128115111	dbSNP153	RBP 6 Splice 1 circRNA 4		GCCTGCCCAGGCTCTCTGTGGCCTCCTGGCTGCGAGGAGGCAGCCAGGGACCAGGTGCCACCCTT	GCCTGCCCAGGCTCTCTGTGGCCTCCTGGCTGTGAGGAGGCAGCCAGGGACCAGGTGCCACCCTT
m5C	chr9:128115111(-)	BS-Seq (High)	Human	SLC25A25-AS1	rs191932098	chr9:128115111..128115111	dbSNP153	RBP 6 Splice 1 circRNA 4		GCCTGCCCAGGCTCTCTGTGGCCTCCTGGCTGCGAGGAGGCAGCCAGGGACCAGGTGCCACCCTT	GCCTGCCCAGGCTCTCTGTGGCCTCCTGGCTGAGAGGAGGCAGCCAGGGACCAGGTGCCACCCTT
m5C	chr9:128115114(-)	BS-Seq (High)	Human	SLC25A25-AS1	rs1291375472	chr9:128115114..128115114	dbSNP153	RBP 6 Splice 1 circRNA 4		CAGGCCTGCCCAGGCTCTCTGTGGCCTCCTGGCTGCGAGGAGGCAGCCAGGGACCAGGTGCCACC	CAGGCCTGCCCAGGCTCTCTGTGGCCTCCTGGTTGCGAGGAGGCAGCCAGGGACCAGGTGCCACC
m5C	chr9:129098114(+)	BS-Seq (High)	Human	AL158151.2	rs1564158252	chr9:129098113..129098114	dbSNP153			GGTGCGGCCCAGGTGAAACATGCGCAGGGAGGCACTTTCATAGGTGGCACATGCCTGTCCGTAGA	GGTGCGGCCCAGGTGAAACATGCGCAGGGAGG_ACTTTCATAGGTGGCACATGCCTGTCCGTAGA
m5C	chr9:129503513(+)	BS-Seq (High)	Human	LINC00963	rs146469064	chr9:129503513..129503513	dbSNP153	RBP 3 circRNA 9		GAGTCATTTTGATTCTGTAACTGGCTTCCTCTCGGCGGGCAGGCTCACACCCTCCACCCCCAGCT	GAGTCATTTTGATTCTGTAACTGGCTTCCTCTTGGCGGGCAGGCTCACACCCTCCACCCCCAGCT
m5C	chr9:129503592(+)	BS-Seq (High)	Human	LINC00963	rs548617086	chr9:129503592..129503592	dbSNP153	RBP 3 Splice 21 circRNA 9		GATGCTCACCGCCCATTCCTCATGCAGGCCATCGATGGAAATGTCAGACAGTGCGAGTCCACGCC	GATGCTCACCGCCCATTCCTCATGCAGGCCATTGATGGAAATGTCAGACAGTGCGAGTCCACGCC
m5C	chr9:129505802(+)	BS-Seq (High)	Human	LINC00963	rs964613272	chr9:129505802..129505802	dbSNP153	RBP 4		AGCCATCATGAGCGCTGGCTCTGGGGGTTGGGCGTTGGGGAGCAGTTTGCTCAGCTGTAAAATGG	AGCCATCATGAGCGCTGGCTCTGGGGGTTGGGTGTTGGGGAGCAGTTTGCTCAGCTGTAAAATGG
m5C	chr9:129506572(+)	BS-Seq (High)	Human	LINC00963	rs1023543551	chr9:129506572..129506572	dbSNP153			AGGCTGGAGTGCAGTGGCACGATATTGGCTCACTGCAAGCTCCGCCTCCTGGGTTCACACCATTC	AGGCTGGAGTGCAGTGGCACGATATTGGCTCATTGCAAGCTCCGCCTCCTGGGTTCACACCATTC
m5C	chr9:129506581(+)	BS-Seq (High)	Human	LINC00963	rs1225605369	chr9:129506581..129506581	dbSNP153			TGCAGTGGCACGATATTGGCTCACTGCAAGCTCCGCCTCCTGGGTTCACACCATTCTCCTGCCTC	TGCAGTGGCACGATATTGGCTCACTGCAAGCTTCGCCTCCTGGGTTCACACCATTCTCCTGCCTC
m5C	chr9:129506616(+)	BS-Seq (High)	Human	LINC00963	rs1183474196	chr9:129506616..129506616	dbSNP153			CCTCCTGGGTTCACACCATTCTCCTGCCTCAGCCTCCCGAGTAGCTGGGACTACAGGCGCCCGCC	CCTCCTGGGTTCACACCATTCTCCTGCCTCAGTCTCCCGAGTAGCTGGGACTACAGGCGCCCGCC
m5C	chr9:129506620(+)	BS-Seq (High)	Human	LINC00963	rs1245291124	chr9:129506620..129506620	dbSNP153			CTGGGTTCACACCATTCTCCTGCCTCAGCCTCCCGAGTAGCTGGGACTACAGGCGCCCGCCACCT	CTGGGTTCACACCATTCTCCTGCCTCAGCCTCACGAGTAGCTGGGACTACAGGCGCCCGCCACCT
m5C	chr9:129506620(+)	BS-Seq (High)	Human	LINC00963	rs1245291124	chr9:129506620..129506620	dbSNP153			CTGGGTTCACACCATTCTCCTGCCTCAGCCTCCCGAGTAGCTGGGACTACAGGCGCCCGCCACCT	CTGGGTTCACACCATTCTCCTGCCTCAGCCTCTCGAGTAGCTGGGACTACAGGCGCCCGCCACCT
m5C	chr9:129506637(+)	BS-Seq (High)	Human	LINC00963	rs1031196069	chr9:129506637..129506637	dbSNP153			TCCTGCCTCAGCCTCCCGAGTAGCTGGGACTACAGGCGCCCGCCACCTCGCCCGTCTAATTTTTT	TCCTGCCTCAGCCTCCCGAGTAGCTGGGACTATAGGCGCCCGCCACCTCGCCCGTCTAATTTTTT
m5C	chr9:129506641(+)	BS-Seq (High)	Human	LINC00963	rs956466947	chr9:129506641..129506641	dbSNP153			GCCTCAGCCTCCCGAGTAGCTGGGACTACAGGCGCCCGCCACCTCGCCCGTCTAATTTTTTGTAT	GCCTCAGCCTCCCGAGTAGCTGGGACTACAGGAGCCCGCCACCTCGCCCGTCTAATTTTTTGTAT
m5C	chr9:129506641(+)	BS-Seq (High)	Human	LINC00963	rs956466947	chr9:129506641..129506641	dbSNP153			GCCTCAGCCTCCCGAGTAGCTGGGACTACAGGCGCCCGCCACCTCGCCCGTCTAATTTTTTGTAT	GCCTCAGCCTCCCGAGTAGCTGGGACTACAGGTGCCCGCCACCTCGCCCGTCTAATTTTTTGTAT
m5C	chr9:129506762(+)	BS-Seq (High)	Human	LINC00963	rs1249753298	chr9:129506762..129506762	dbSNP153	Splice 2		TCGTCATCCGCCCGTCTCGGCCTCCCATAGTGCTGGGATTACAGGCATGAGCCACCACGCCCGGC	TCGTCATCCGCCCGTCTCGGCCTCCCATAGTGTTGGGATTACAGGCATGAGCCACCACGCCCGGC
m5C	chr9:84604338(+)	BS-Seq (High)	Human	AL157886.1	-	chr9:84604338..84604338	ICGC			TTTCTTTTTTTCTTTCTTTTTCTCTTTTTTCTCCTCCTCCTCCTCTCCCTACTTTCCCTCCTCCT	TTTCTTTTTTTCTTTCTTTTTCTCTTTTTTCTTCTCCTCCTCCTCTCCCTACTTTCCCTCCTCCT
m5C	chr9:84604338(+)	BS-Seq (High)	Human	AL157886.1	-	chr9:84604338..84604338	ICGC			TTTCTTTTTTTCTTTCTTTTTCTCTTTTTTCTCCTCCTCCTCCTCTCCCTACTTTCCCTCCTCCT	TTTCTTTTTTTCTTTCTTTTTCTCTTTTTTCTACTCCTCCTCCTCTCCCTACTTTCCCTCCTCCT
m5C	chr9:137616128(-)	BS-Seq (High)	Human	ARRDC1-AS1	-	chr9:137616128..137616128	TCGA	Splice 3		CTGACCTCAAGCAATCCACCTGCCTCAGCCTCCCAAAGTACTGGGATTACAGGAGGGAGCCACCG	CTGACCTCAAGCAATCCACCTGCCTCAGCCTCTCAAAGTACTGGGATTACAGGAGGGAGCCACCG
m5C	chr9:110256656(-)	BS-Seq (High)	Human	lnc-C9orf152-4	-	chr9:110256656..110256656	ICGC			GCCCTGGAGCTCCGCCCCACGCTTGCGCCAGCCCCGCCCCGATCCCGGCTCGCAGGCTCCAGGGG	GCCCTGGAGCTCCGCCCCACGCTTGCGCCAGCTCCGCCCCGATCCCGGCTCGCAGGCTCCAGGGG
m5C	chr9:122404679(+)	BS-Seq (High)	Human	AL359636.2	-	chr9:122404679..122404679	ICGC	Splice 1		TTGAACTTTTTTTTTTTTGAGACAGGGTCTTGCTCTGTCATTCCAGCTGGAGTGCAGAGGTGTGT	TTGAACTTTTTTTTTTTTGAGACAGGGTCTTGTTCTGTCATTCCAGCTGGAGTGCAGAGGTGTGT
m5C	chr9:136802944(-)	BS-Seq (High)	Human	CCDC183-AS1,CCDC183-AS1:2,CCDC183-AS1:3,CCDC183-AS1:4,CCDC183-AS1:5,CCDC183-AS1:6,CCDC183-AS1:7,CCDC183-AS1:8,CCDC183-AS1:9	rs878953924	chr9:136802944..136802944	COSMIC			AAGATCCAAGAGGGCTGGCCCTGGGGGGCCCCCGGCCCTGGGCCCTGAGCTCACCTTGACCCCAT	AAGATCCAAGAGGGCTGGCCCTGGGGGGCCCCTGGCCCTGGGCCCTGAGCTCACCTTGACCCCAT
m5C	chr9:84604344(+)	BS-Seq (High)	Human	AL157886.1	-	chr9:84604344..84604344	ICGC			TTTTTCTTTCTTTTTCTCTTTTTTCTCCTCCTCCTCCTCTCCCTACTTTCCCTCCTCCTCCTTCT	TTTTTCTTTCTTTTTCTCTTTTTTCTCCTCCTACTCCTCTCCCTACTTTCCCTCCTCCTCCTTCT
m5C	chr9:129506641(+)	BS-Seq (High)	Human	LINC00963	rs956466947	chr9:129506641..129506641	ICGC			GCCTCAGCCTCCCGAGTAGCTGGGACTACAGGCGCCCGCCACCTCGCCCGTCTAATTTTTTGTAT	GCCTCAGCCTCCCGAGTAGCTGGGACTACAGGTGCCCGCCACCTCGCCCGTCTAATTTTTTGTAT
m5C	chr10:45972168(-)	BS-Seq (High)	Human	HSALNG0077912	rs1554911751	chr10:45972168..45972168	dbSNP153			TCTCCGCCCGGGGCCGGCCCGGGGACAGTGCGCTGCTGGTCCCAGCATGAATGCGGGCCCCGGCT	TCTCCGCCCGGGGCCGGCCCGGGGACAGTGCGTTGCTGGTCCCAGCATGAATGCGGGCCCCGGCT
m5C	chr10:46414829(+)	BS-Seq (High)	Human	LINC00842,AC244230.2	rs1323798363	chr10:46414829..46414829	dbSNP153			ACCTGTAATCCCAGCACTTTCGGAGGCTGAGGCAGGAGGATCGCTTGAGGACAGGAATTCAAGCC	ACCTGTAATCCCAGCACTTTCGGAGGCTGAGGGAGGAGGATCGCTTGAGGACAGGAATTCAAGCC
m5C	chr10:68544482(-)	BS-Seq (High)	Human	HSALNG0078530	rs1280622093	chr10:68544480..68544483	dbSNP153			TTCGTATGTTGATGACATCTGATTAGCAGAATCAGATGTTCCAGCTTGGACTCATGAAGGATTAA	TTCGTATGTTGATGACATCTGATTAGCAGAA___GATGTTCCAGCTTGGACTCATGAAGGATTAA
m5C	chr10:68544482(-)	BS-Seq (High)	Human	HSALNG0078530	rs201796494	chr10:68544482..68544482	dbSNP153			TTCGTATGTTGATGACATCTGATTAGCAGAATCAGATGTTCCAGCTTGGACTCATGAAGGATTAA	TTCGTATGTTGATGACATCTGATTAGCAGAATGAGATGTTCCAGCTTGGACTCATGAAGGATTAA
m5C	chr10:95869336(-)	BS-Seq (High)	Human	ENTPD1-AS1	rs377105171	chr10:95869336..95869336	dbSNP153	circRNA 2		CTGAGGCAGGAGAATTGCTTGAACCCAGGAGGCGGAGGTTGCAGTGAGCCGAGATAGCACCACTG	CTGAGGCAGGAGAATTGCTTGAACCCAGGAGGTGGAGGTTGCAGTGAGCCGAGATAGCACCACTG
m5C	chr10:96587146(+)	BS-Seq (High)	Human	lnc-LCOR-4,lnc-LCOR-4:2,lnc-LCOR-4:3,lnc-LCOR-4:4,lnc-LCOR-4:5	rs969289668	chr10:96587146..96587146	dbSNP153			CGCCACCGCCGCCGGGCCGAGGGAGGGCCCGGCAACCGCCGCCTGCGCGCCGGCTGCCCCTCGGC	CGCCACCGCCGCCGGGCCGAGGGAGGGCCCGGAAACCGCCGCCTGCGCGCCGGCTGCCCCTCGGC
m5C	chr10:96587146(+)	BS-Seq (High)	Human	lnc-LCOR-4,lnc-LCOR-4:2,lnc-LCOR-4:3,lnc-LCOR-4:4,lnc-LCOR-4:5	rs969289668	chr10:96587146..96587146	dbSNP153			CGCCACCGCCGCCGGGCCGAGGGAGGGCCCGGCAACCGCCGCCTGCGCGCCGGCTGCCCCTCGGC	CGCCACCGCCGCCGGGCCGAGGGAGGGCCCGGTAACCGCCGCCTGCGCGCCGGCTGCCCCTCGGC
m5C	chr10:101729891(-)	BS-Seq (High)	Human	AC010789.1	rs147648086	chr10:101729891..101729891	dbSNP153			TCGTGATCCACCCGCCTCGGCCTCCCAAAGTGCTGGGATTACAAAATGCGTGAGCCACCACGCCC	TCGTGATCCACCCGCCTCGGCCTCCCAAAGTGTTGGGATTACAAAATGCGTGAGCCACCACGCCC
m5C	chr10:101729900(-)	BS-Seq (High)	Human	AC010789.1	rs1242421412	chr10:101729900..101729900	dbSNP153			CTCCTGACCTCGTGATCCACCCGCCTCGGCCTCCCAAAGTGCTGGGATTACAAAATGCGTGAGCC	CTCCTGACCTCGTGATCCACCCGCCTCGGCCTTCCAAAGTGCTGGGATTACAAAATGCGTGAGCC
m5C	chr10:101729903(-)	BS-Seq (High)	Human	AC010789.1	rs1303494143	chr10:101729903..101729903	dbSNP153			TGTCTCCTGACCTCGTGATCCACCCGCCTCGGCCTCCCAAAGTGCTGGGATTACAAAATGCGTGA	TGTCTCCTGACCTCGTGATCCACCCGCCTCGGACTCCCAAAGTGCTGGGATTACAAAATGCGTGA
m5C	chr10:102230990(+)	BS-Seq (High)	Human	lnc-ELOVL3-1	rs771168903	chr10:102230990..102230990	dbSNP153			GTTGCCGTACGAGTAGCCGGGGTACACCTCCTCGTAGGGCGGCACCAGCCCCCCGAGCGGCGCCG	GTTGCCGTACGAGTAGCCGGGGTACACCTCCTTGTAGGGCGGCACCAGCCCCCCGAGCGGCGCCG
m5C	chr10:102450750(+)	BS-Seq (High)	Human	RPARP-AS1	rs866539750	chr10:102450750..102450750	dbSNP153	RBP 3 circRNA 4		GGCCCCAGCGCAGCTCGGTTTGCAGGCTCCCGCCCTCCGGCCACGGCGCCCAGCTCTCGGCCACC	GGCCCCAGCGCAGCTCGGTTTGCAGGCTCCCGACCTCCGGCCACGGCGCCCAGCTCTCGGCCACC
m5C	chr10:102450750(+)	BS-Seq (High)	Human	RPARP-AS1	rs866539750	chr10:102450750..102450750	dbSNP153	RBP 3 circRNA 4		GGCCCCAGCGCAGCTCGGTTTGCAGGCTCCCGCCCTCCGGCCACGGCGCCCAGCTCTCGGCCACC	GGCCCCAGCGCAGCTCGGTTTGCAGGCTCCCGTCCTCCGGCCACGGCGCCCAGCTCTCGGCCACC
m5C	chr10:102450758(+)	BS-Seq (High)	Human	RPARP-AS1	rs748248739	chr10:102450757..102450758	dbSNP153	RBP 3 circRNA 4		CGCAGCTCGGTTTGCAGGCTCCCGCCCTCCGGCCACGGCGCCCAGCTCTCGGCCACCGCCGCGGG	CGCAGCTCGGTTTGCAGGCTCCCGCCCTCCGG_CACGGCGCCCAGCTCTCGGCCACCGCCGCGGG
m5C	chr10:21495871(-)	BS-Seq (High)	Human	MIR1915HG	rs1178719381	chr10:21495871..21495871	dbSNP153,HGVD	Splice 1		GCCCGCTGCACGCGGCGGCGCGGGAGAAACCACGGGGCAGCAGCGCCCCCTGCAGGTGCCGGGCG	GCCCGCTGCACGCGGCGGCGCGGGAGAAACCATGGGGCAGCAGCGCCCCCTGCAGGTGCCGGGCG
m5C	chr10:21495871(-)	BS-Seq (High)	Human	MIR1915HG	rs1178719381	chr10:21495871..21495871	dbSNP153	Splice 1		GCCCGCTGCACGCGGCGGCGCGGGAGAAACCACGGGGCAGCAGCGCCCCCTGCAGGTGCCGGGCG	GCCCGCTGCACGCGGCGGCGCGGGAGAAACCAGGGGGCAGCAGCGCCCCCTGCAGGTGCCGGGCG
m5C	chr10:28523707(-)	BS-Seq (High)	Human	WAC-AS1	rs1024853277	chr10:28523707..28523707	dbSNP153			TGTGGTGGCACGTGCCTGTGGTCCCAGCTACTCGAGAGGCTAAGGCAGGAAAATCGCTTGAACCC	TGTGGTGGCACGTGCCTGTGGTCCCAGCTACTTGAGAGGCTAAGGCAGGAAAATCGCTTGAACCC
m5C	chr10:28523707(-)	BS-Seq (High)	Human	WAC-AS1	rs1024853277	chr10:28523707..28523707	dbSNP153			TGTGGTGGCACGTGCCTGTGGTCCCAGCTACTCGAGAGGCTAAGGCAGGAAAATCGCTTGAACCC	TGTGGTGGCACGTGCCTGTGGTCCCAGCTACTGGAGAGGCTAAGGCAGGAAAATCGCTTGAACCC
m5C	chr10:75399223(-)	BS-Seq (High)	Human	AC010997.3,ZNF503	rs1414656967	chr10:75399223..75399223	dbSNP153	RBP 4		CACTCCTCGCTAACGGCCGCCGCGGCTGCTGGCGCCACACCGCCCTCCCTGGCCGGCCACCCCCT	CACTCCTCGCTAACGGCCGCCGCGGCTGCTGGAGCCACACCGCCCTCCCTGGCCGGCCACCCCCT
m5C	chr10:75399227(-)	BS-Seq (High)	Human	AC010997.3,ZNF503	rs1225928412	chr10:75399227..75399227	dbSNP153	RBP 5		TGTGCACTCCTCGCTAACGGCCGCCGCGGCTGCTGGCGCCACACCGCCCTCCCTGGCCGGCCACC	TGTGCACTCCTCGCTAACGGCCGCCGCGGCTGTTGGCGCCACACCGCCCTCCCTGGCCGGCCACC
m5C	chr10:75399233(-)	BS-Seq (High)	Human	AC010997.3,ZNF503	rs200222246	chr10:75399233..75399233	dbSNP153	RBP 4		GCACGGTGTGCACTCCTCGCTAACGGCCGCCGCGGCTGCTGGCGCCACACCGCCCTCCCTGGCCG	GCACGGTGTGCACTCCTCGCTAACGGCCGCCGTGGCTGCTGGCGCCACACCGCCCTCCCTGGCCG
m5C	chr10:75399233(-)	BS-Seq (High)	Human	AC010997.3,ZNF503	rs200222246	chr10:75399233..75399233	dbSNP153	RBP 4		GCACGGTGTGCACTCCTCGCTAACGGCCGCCGCGGCTGCTGGCGCCACACCGCCCTCCCTGGCCG	GCACGGTGTGCACTCCTCGCTAACGGCCGCCGAGGCTGCTGGCGCCACACCGCCCTCCCTGGCCG
m5C	chr10:75399538(-)	BS-Seq (High)	Human	AC010997.3,ZNF503	rs1193980390	chr10:75399538..75399538	dbSNP153	RBP 7		TTCCTGCCACACGGCGTGGCACTTGACCCCACCAAGCCGGGCAGCCTGGTGGGGGCGCAGCTGGC	TTCCTGCCACACGGCGTGGCACTTGACCCCACTAAGCCGGGCAGCCTGGTGGGGGCGCAGCTGGC
m5C	chr10:86970159(-)	BS-Seq (High)	Human	ADIRF-AS1	rs376712291	chr10:86970159..86970159	dbSNP153			GAGAGATGTGGCTTTTAGCCCCTGTTGAGGCACCACCGACTACAGGTGCCCCACCATTGCCATGC	GAGAGATGTGGCTTTTAGCCCCTGTTGAGGCATCACCGACTACAGGTGCCCCACCATTGCCATGC
m5C	chr10:32346865(+)	BS-Seq (High)	Human	AL391839.2	rs750531881	chr10:32346865..32346865	dbSNP153	Splice 1		AGGTCGGGCAGATCCTCACAGCGGAAAACCGGCAGCGGCTTCGAGGCGTCTAGCGCCCGCGCCCG	AGGTCGGGCAGATCCTCACAGCGGAAAACCGGGAGCGGCTTCGAGGCGTCTAGCGCCCGCGCCCG
m5C	chr10:46414829(+)	BS-Seq (High)	Human	LINC00842,AC244230.2	-	chr10:46414829..46414829	ICGC			ACCTGTAATCCCAGCACTTTCGGAGGCTGAGGCAGGAGGATCGCTTGAGGACAGGAATTCAAGCC	ACCTGTAATCCCAGCACTTTCGGAGGCTGAGGTAGGAGGATCGCTTGAGGACAGGAATTCAAGCC
m5C	chr10:78961375(-)	BS-Seq (High)	Human	ZMIZ1-AS1	-	chr10:78961375..78961375	ICGC	RBP 1 Splice 1		GTCTTGGAAACGCCCCTGTACCCCAGAAACTTCCTGATCAGTCCCTGGTCAGTGTATATCATGCT	GTCTTGGAAACGCCCCTGTACCCCAGAAACTTTCTGATCAGTCCCTGGTCAGTGTATATCATGCT
m5C	chr10:75399233(-)	BS-Seq (High)	Human	AC010997.3,ZNF503	rs200222246	chr10:75399233..75399233	ICGC,COSMIC	RBP 4		GCACGGTGTGCACTCCTCGCTAACGGCCGCCGCGGCTGCTGGCGCCACACCGCCCTCCCTGGCCG	GCACGGTGTGCACTCCTCGCTAACGGCCGCCGTGGCTGCTGGCGCCACACCGCCCTCCCTGGCCG
m5C	chr11:62771466(-)	BS-Seq (High)	Human	AP001160.2	rs964079527	chr11:62771466..62771466	dbSNP153	circRNA 1		CTGCTCACCTGAAGACCCCGGCGTGGCGAAGGCTGCTACCGAGACGACGGCGGCGGGGGCGGTGG	CTGCTCACCTGAAGACCCCGGCGTGGCGAAGGGTGCTACCGAGACGACGGCGGCGGGGGCGGTGG
m5C	chr11:64184413(-)	BS-Seq (High)	Human	lnc-MACROD1-1,lnc-MACROD1-1:2,lnc-MACROD1-1:3,lnc-MACROD1-1:4,lnc-MACROD1-1:5,lnc-MACROD1-1:6,lnc-MACROD1-1:7	rs919405484	chr11:64184413..64184413	dbSNP153			GGGCAATCTCGGCTCCCTGCAACCTCTGCCTCCTGGGTTCAAGCAATTATCCTGCCTCAGCCTAC	GGGCAATCTCGGCTCCCTGCAACCTCTGCCTCTTGGGTTCAAGCAATTATCCTGCCTCAGCCTAC
m5C	chr11:64184414(-)	BS-Seq (High)	Human	lnc-MACROD1-1,lnc-MACROD1-1:2,lnc-MACROD1-1:3,lnc-MACROD1-1:4,lnc-MACROD1-1:5,lnc-MACROD1-1:6,lnc-MACROD1-1:7	rs1307513707	chr11:64184414..64184414	dbSNP153			GGGGCAATCTCGGCTCCCTGCAACCTCTGCCTCCTGGGTTCAAGCAATTATCCTGCCTCAGCCTA	GGGGCAATCTCGGCTCCCTGCAACCTCTGCCTTCTGGGTTCAAGCAATTATCCTGCCTCAGCCTA
m5C	chr11:64184417(-)	BS-Seq (High)	Human	lnc-MACROD1-1,lnc-MACROD1-1:2,lnc-MACROD1-1:3,lnc-MACROD1-1:4,lnc-MACROD1-1:5,lnc-MACROD1-1:6,lnc-MACROD1-1:7	rs1001735341	chr11:64184417..64184417	dbSNP153			AGTGGGGCAATCTCGGCTCCCTGCAACCTCTGCCTCCTGGGTTCAAGCAATTATCCTGCCTCAGC	AGTGGGGCAATCTCGGCTCCCTGCAACCTCTGTCTCCTGGGTTCAAGCAATTATCCTGCCTCAGC
m5C	chr11:65423403(+)	BS-Seq (High)	Human	NEAT1	rs778354197	chr11:65423403..65423403	dbSNP153	RBP 24 miRNA 2		CTGGCCCAGGGTGGTATGTAATTTTCGCTCGGCCTGGGACGGGGCCCAGGCCGGGCCCAGCCTGG	CTGGCCCAGGGTGGTATGTAATTTTCGCTCGGTCTGGGACGGGGCCCAGGCCGGGCCCAGCCTGG
m5C	chr11:65423416(+)	BS-Seq (High)	Human	NEAT1	rs79376422	chr11:65423416..65423416	dbSNP153	RBP 17 miRNA 1		GTATGTAATTTTCGCTCGGCCTGGGACGGGGCCCAGGCCGGGCCCAGCCTGGTGGAGCGTCCAGG	GTATGTAATTTTCGCTCGGCCTGGGACGGGGCACAGGCCGGGCCCAGCCTGGTGGAGCGTCCAGG
m5C	chr11:65425306(+)	BS-Seq (High)	Human	NEAT1	rs1027991265	chr11:65425306..65425306	dbSNP153	RBP 10 miRNA 6		CAGGTGACACAGAGTCACCAGTTTTCCGAGAACCAAAGGGAGGGGTGTGTGATGCCATCTCACAG	CAGGTGACACAGAGTCACCAGTTTTCCGAGAAACAAAGGGAGGGGTGTGTGATGCCATCTCACAG
m5C	chr11:68028035(-)	BS-Seq (High)	Human	AC004923.4	rs760340602	chr11:68028035..68028035	dbSNP153			TGCTTTGAGGGGTGCCCTGGAGCCTTGGCAATCCTTTTCCTCCTCGGGCCCGGGAGCCCAGGCCC	TGCTTTGAGGGGTGCCCTGGAGCCTTGGCAATTCTTTTCCTCCTCGGGCCCGGGAGCCCAGGCCC
m5C	chr11:722758(-)	BS-Seq (High)	Human	AP006621.4	rs1313759203	chr11:722758..722758	dbSNP153			AGACGCCAGCCCCTCCACCTCCCAGGGGGCCTCCTGCAGCACATCCACAGGAGGCTCCCAGCCGC	AGACGCCAGCCCCTCCACCTCCCAGGGGGCCTTCTGCAGCACATCCACAGGAGGCTCCCAGCCGC
m5C	chr11:1995228(-)	BS-Seq (High)	Human	H19	rs755331373	chr11:1995228..1995228	dbSNP153	RBP 2 miRNA 6 circRNA 4		TACGCCCCATCTCGCTCTGTGCCCCTCCCCACCAGGGCTTCAGCAGGAGCCCTGGACTCATCATC	TACGCCCCATCTCGCTCTGTGCCCCTCCCCACTAGGGCTTCAGCAGGAGCCCTGGACTCATCATC
m5C	chr11:1995503(-)	BS-Seq (High)	Human	H19	rs551634894	chr11:1995503..1995503	dbSNP153	RBP 2 miRNA 4 circRNA 4		GAGATTCAAAGCCTCCACGACTCTGTTTCCCCCGTCCCTTCTGAATTTAATTTGCACTAAGTCAT	GAGATTCAAAGCCTCCACGACTCTGTTTCCCCTGTCCCTTCTGAATTTAATTTGCACTAAGTCAT
m5C	chr11:1996003(-)	BS-Seq (High)	Human	H19	rs111714200	chr11:1996003..1996003	dbSNP153	RBP 1 miRNA 3 circRNA 6		GGAGCTGAGTGGGACCTCACTCCTTCCCCATCCACAGAAATGGTGCTACCCAGCTCAAGCCTGGG	GGAGCTGAGTGGGACCTCACTCCTTCCCCATCGACAGAAATGGTGCTACCCAGCTCAAGCCTGGG
m5C	chr11:1996427(-)	BS-Seq (High)	Human	H19	rs758648106	chr11:1996427..1996427	dbSNP153	miRNA 6 circRNA 4		CACGTTCTCCCCACACGACTCTCTCGTTCTCCCCACAGCCAGGTCTCCAGCTGGGGTGGACGTGC	CACGTTCTCCCCACACGACTCTCTCGTTCTCCTCACAGCCAGGTCTCCAGCTGGGGTGGACGTGC
m5C	chr11:1996890(-)	BS-Seq (High)	Human	H19	rs945977096	chr11:1996890..1996890	dbSNP153	RBP 1 circRNA 4		AGCGGCCACGGGAGGGGGGCCCCGGGACATTGCGCAGCAAGGAGGCTGCAGGGGCTCGGCCTGCG	AGCGGCCACGGGAGGGGGGCCCCGGGACATTGTGCAGCAAGGAGGCTGCAGGGGCTCGGCCTGCG
m5C	chr11:1996890(-)	BS-Seq (High)	Human	H19	rs945977096	chr11:1996890..1996890	dbSNP153	RBP 1 circRNA 4		AGCGGCCACGGGAGGGGGGCCCCGGGACATTGCGCAGCAAGGAGGCTGCAGGGGCTCGGCCTGCG	AGCGGCCACGGGAGGGGGGCCCCGGGACATTGAGCAGCAAGGAGGCTGCAGGGGCTCGGCCTGCG
m5C	chr11:2167446(+)	BS-Seq (High)	Human	NONHSAG007414.2	rs11564716	chr11:2167446..2167446	dbSNP153		Clinvar_Rec_764	CTAGCTGCACGGAGGTCTCACCAGGTGGCAATCTCCTCGGCGGTGTACTCCACACGGGGAATCGG	CTAGCTGCACGGAGGTCTCACCAGGTGGCAATTTCCTCGGCGGTGTACTCCACACGGGGAATCGG
m5C	chr11:2885223(+)	BS-Seq (High)	Human	NONHSAG007437.2	rs1416751869	chr11:2885223..2885223	dbSNP153			CAGCGCCCCACCTGCACCGTCTCGCGGTAGAACGCGGGCACCGAGTCGCTGTCCACTTCGGTCCA	CAGCGCCCCACCTGCACCGTCTCGCGGTAGAAGGCGGGCACCGAGTCGCTGTCCACTTCGGTCCA
m5C	chr11:6563125(-)	BS-Seq (High)	Human	lnc-RRP8-5	rs1460574118	chr11:6563125..6563125	dbSNP153			CAGGGCAGGCGGCAGGAAGAGCCCACCTGCTCCAGGAAAGCCTCTCGCTGAGCTTGCAGGGCATC	CAGGGCAGGCGGCAGGAAGAGCCCACCTGCTCTAGGAAAGCCTCTCGCTGAGCTTGCAGGGCATC
m5C	chr11:6611822(-)	BS-Seq (High)	Human	AC091564.7,TAF10	rs747279291	chr11:6611820..6611823	dbSNP153	RBP 6 circRNA 2		CCACCTCTGTGTCTCATTTTGCTGGTTCTCCTCCAGCTCCGGTGTCGGCGGGTGGCGCGGCGCCC	CCACCTCTGTGTCTCATTTTGCTGGTTCTCC___AGCTCCGGTGTCGGCGGGTGGCGCGGCGCCC
m5C	chr11:6611824(-)	BS-Seq (High)	Human	AC091564.7,TAF10	rs750600414	chr11:6611824..6611824	dbSNP153,HGVD	RBP 5 circRNA 2		TCCCACCTCTGTGTCTCATTTTGCTGGTTCTCCTCCAGCTCCGGTGTCGGCGGGTGGCGCGGCGC	TCCCACCTCTGTGTCTCATTTTGCTGGTTCTCTTCCAGCTCCGGTGTCGGCGGGTGGCGCGGCGC
m5C	chr11:6611825(-)	BS-Seq (High)	Human	AC091564.7,TAF10	rs763371213	chr11:6611825..6611825	dbSNP153	RBP 5 circRNA 2		CTCCCACCTCTGTGTCTCATTTTGCTGGTTCTCCTCCAGCTCCGGTGTCGGCGGGTGGCGCGGCG	CTCCCACCTCTGTGTCTCATTTTGCTGGTTCTTCTCCAGCTCCGGTGTCGGCGGGTGGCGCGGCG
m5C	chr11:6612137(-)	BS-Seq (High)	Human	AC091564.7,TAF10	rs1378893609	chr11:6612129..6612138	dbSNP153	RBP 4 miRNA 2 circRNA 2		CGCGGACCCCGAGGCGGCGCCGGCCTCCGCCGCCTCGGCCCCGGGCCCCGCGCCCCCGGTCTCGG	CGCGGACCCCGAGGCGGCGCCGGCCTCCGCC_________CCGGGCCCCGCGCCCCCGGTCTCGG
m5C	chr11:6612134(-)	BS-Seq (High)	Human	AC091564.7,TAF10	rs1469062169	chr11:6612134..6612134	dbSNP153	RBP 3 miRNA 2 circRNA 2		GGACCCCGAGGCGGCGCCGGCCTCCGCCGCCTCGGCCCCGGGCCCCGCGCCCCCGGTCTCGGCTC	GGACCCCGAGGCGGCGCCGGCCTCCGCCGCCTTGGCCCCGGGCCCCGCGCCCCCGGTCTCGGCTC
m5C	chr11:6612139(-)	BS-Seq (High)	Human	AC091564.7,TAF10	rs903912208	chr11:6612139..6612139	dbSNP153	RBP 4 miRNA 2 circRNA 2		GGCGCGGACCCCGAGGCGGCGCCGGCCTCCGCCGCCTCGGCCCCGGGCCCCGCGCCCCCGGTCTC	GGCGCGGACCCCGAGGCGGCGCCGGCCTCCGCTGCCTCGGCCCCGGGCCCCGCGCCCCCGGTCTC
m5C	chr11:6612140(-)	BS-Seq (High)	Human	AC091564.7,TAF10	rs943447900	chr11:6612140..6612140	dbSNP153	RBP 5 miRNA 1 circRNA 2		CGGCGCGGACCCCGAGGCGGCGCCGGCCTCCGCCGCCTCGGCCCCGGGCCCCGCGCCCCCGGTCT	CGGCGCGGACCCCGAGGCGGCGCCGGCCTCCGTCGCCTCGGCCCCGGGCCCCGCGCCCCCGGTCT
m5C	chr11:6612152(-)	BS-Seq (High)	Human	AC091564.7,TAF10	-	chr11:6612152..6612152	HGVD	RBP 4 circRNA 2		CTGCAGCGGCTCCGGCGCGGACCCCGAGGCGGCGCCGGCCTCCGCCGCCTCGGCCCCGGGCCCCG	CTGCAGCGGCTCCGGCGCGGACCCCGAGGCGGTGCCGGCCTCCGCCGCCTCGGCCCCGGGCCCCG
m5C	chr11:6612155(-)	BS-Seq (High)	Human	AC091564.7,TAF10	rs1183401585	chr11:6612155..6612155	dbSNP153	RBP 4 circRNA 2		GAGCTGCAGCGGCTCCGGCGCGGACCCCGAGGCGGCGCCGGCCTCCGCCGCCTCGGCCCCGGGCC	GAGCTGCAGCGGCTCCGGCGCGGACCCCGAGGTGGCGCCGGCCTCCGCCGCCTCGGCCCCGGGCC
m5C	chr11:6612191(-)	BS-Seq (High)	Human	AC091564.7,TAF10	rs191153660	chr11:6612191..6612191	dbSNP153	RBP 7 circRNA 2		AGCGGCTCTGTTCGCCGCCTCTCCCACCGGCCCGATGAGCTGCAGCGGCTCCGGCGCGGACCCCG	AGCGGCTCTGTTCGCCGCCTCTCCCACCGGCCTGATGAGCTGCAGCGGCTCCGGCGCGGACCCCG
m5C	chr11:6612191(-)	BS-Seq (High)	Human	AC091564.7,TAF10	rs191153660	chr11:6612191..6612191	dbSNP153	RBP 7 circRNA 2		AGCGGCTCTGTTCGCCGCCTCTCCCACCGGCCCGATGAGCTGCAGCGGCTCCGGCGCGGACCCCG	AGCGGCTCTGTTCGCCGCCTCTCCCACCGGCCGGATGAGCTGCAGCGGCTCCGGCGCGGACCCCG
m5C	chr11:6612191(-)	BS-Seq (High)	Human	AC091564.7,TAF10	rs191153660	chr11:6612191..6612191	dbSNP153	RBP 7 circRNA 2		AGCGGCTCTGTTCGCCGCCTCTCCCACCGGCCCGATGAGCTGCAGCGGCTCCGGCGCGGACCCCG	AGCGGCTCTGTTCGCCGCCTCTCCCACCGGCCAGATGAGCTGCAGCGGCTCCGGCGCGGACCCCG
m5C	chr11:6612192(-)	BS-Seq (High)	Human	AC091564.7,TAF10	rs1424853799	chr11:6612192..6612192	dbSNP153	RBP 7 circRNA 2		AAGCGGCTCTGTTCGCCGCCTCTCCCACCGGCCCGATGAGCTGCAGCGGCTCCGGCGCGGACCCC	AAGCGGCTCTGTTCGCCGCCTCTCCCACCGGCTCGATGAGCTGCAGCGGCTCCGGCGCGGACCCC
m5C	chr11:6612192(-)	BS-Seq (High)	Human	AC091564.7,TAF10	rs1424853799	chr11:6612192..6612192	dbSNP153	RBP 7 circRNA 2		AAGCGGCTCTGTTCGCCGCCTCTCCCACCGGCCCGATGAGCTGCAGCGGCTCCGGCGCGGACCCC	AAGCGGCTCTGTTCGCCGCCTCTCCCACCGGCACGATGAGCTGCAGCGGCTCCGGCGCGGACCCC
m5C	chr11:6612197(-)	BS-Seq (High)	Human	AC091564.7,TAF10	rs1304546359	chr11:6612197..6612197	dbSNP153	RBP 6 circRNA 2		AGCGGAAGCGGCTCTGTTCGCCGCCTCTCCCACCGGCCCGATGAGCTGCAGCGGCTCCGGCGCGG	AGCGGAAGCGGCTCTGTTCGCCGCCTCTCCCAGCGGCCCGATGAGCTGCAGCGGCTCCGGCGCGG
m5C	chr11:12962277(-)	BS-Seq (High)	Human	LINC00958	rs965293656	chr11:12962277..12962277	dbSNP153			CGGGCTCAGGTGATCCTCCCACCTGAGCCTCCCGAGTAGCTGGGACTACAGATGCACACCACCAT	CGGGCTCAGGTGATCCTCCCACCTGAGCCTCCTGAGTAGCTGGGACTACAGATGCACACCACCAT
m5C	chr11:12962281(-)	BS-Seq (High)	Human	LINC00958	rs1344684510	chr11:12962281..12962281	dbSNP153			CTCCCGGGCTCAGGTGATCCTCCCACCTGAGCCTCCCGAGTAGCTGGGACTACAGATGCACACCA	CTCCCGGGCTCAGGTGATCCTCCCACCTGAGCTTCCCGAGTAGCTGGGACTACAGATGCACACCA
m5C	chr11:12965193(-)	BS-Seq (High)	Human	LINC00958	rs1253126638	chr11:12965193..12965193	dbSNP153	Splice 2		TTCTGAGACAGGGTCTTGCTCTGTCACCCAGGCTGGAGTGCAGTGACACAATGCTGGCTCAACCT	TTCTGAGACAGGGTCTTGCTCTGTCACCCAGGTTGGAGTGCAGTGACACAATGCTGGCTCAACCT
m5C	chr11:12979790(-)	BS-Seq (High)	Human	LINC00958	rs891744045	chr11:12979790..12979790	dbSNP153	circRNA 2		GTACGCACCTGTAATCCCAGCTACTCCGGAGGCTGAGGCAGCAGAATCGCTTGAACCCAGGAGGC	GTACGCACCTGTAATCCCAGCTACTCCGGAGGGTGAGGCAGCAGAATCGCTTGAACCCAGGAGGC
m5C	chr11:18012966(-)	BS-Seq (High)	Human	SERGEF,AC055860.1	rs968193055	chr11:18012966..18012966	dbSNP153	Splice 4		CCCAGCGCCTCGGAGGCCGCCCCCGCGGCGGCCGCGCTCTTCGCCTGGGTACGTGACTCCGCCCC	CCCAGCGCCTCGGAGGCCGCCCCCGCGGCGGCGGCGCTCTTCGCCTGGGTACGTGACTCCGCCCC
m5C	chr11:19235049(+)	BS-Seq (High)	Human	CSRP3-AS1	rs1212690643	chr11:19235049..19235049	dbSNP153			CTAGGACGTTCACGATATCGTAAATGCGTCGACGTTCAACATCTACAAAGAATGTGCAATTGTGT	CTAGGACGTTCACGATATCGTAAATGCGTCGATGTTCAACATCTACAAAGAATGTGCAATTGTGT
m5C	chr11:46868085(+)	BS-Seq (High)	Human	LRP4-AS1	rs768284053	chr11:46868085..46868085	dbSNP153			TAGCACTGGGCTCTTTTCACTCATGCCAGTAGCCCTAGGAGCTGGTGGTACCAGGCCAGGCACTA	TAGCACTGGGCTCTTTTCACTCATGCCAGTAGTCCTAGGAGCTGGTGGTACCAGGCCAGGCACTA
m5C	chr11:73308583(-)	BS-Seq (High)	Human	AP002761.3	rs946366814	chr11:73308582..73308583	dbSNP153	RBP 1		GGCTGGCCTCGGGCAGCCGCGGCCAACCCCCCCTGCGCCCCCACTCCCTAGGAGCGCAGCGGCCC	GGCTGGCCTCGGGCAGCCGCGGCCAACCCCCC_TGCGCCCCCACTCCCTAGGAGCGCAGCGGCCC
m5C	chr11:73308586(-)	BS-Seq (High)	Human	AP002761.3	rs1043354963	chr11:73308586..73308586	dbSNP153	RBP 1		GGGGGCTGGCCTCGGGCAGCCGCGGCCAACCCCCCCTGCGCCCCCACTCCCTAGGAGCGCAGCGG	GGGGGCTGGCCTCGGGCAGCCGCGGCCAACCCTCCCTGCGCCCCCACTCCCTAGGAGCGCAGCGG
m5C	chr11:73308586(-)	BS-Seq (High)	Human	AP002761.3	rs1043354963	chr11:73308586..73308586	dbSNP153	RBP 1		GGGGGCTGGCCTCGGGCAGCCGCGGCCAACCCCCCCTGCGCCCCCACTCCCTAGGAGCGCAGCGG	GGGGGCTGGCCTCGGGCAGCCGCGGCCAACCCACCCTGCGCCCCCACTCCCTAGGAGCGCAGCGG
m5C	chr11:73308588(-)	BS-Seq (High)	Human	AP002761.3	rs770447675	chr11:73308588..73308588	dbSNP153	RBP 1		GGGGGGGCTGGCCTCGGGCAGCCGCGGCCAACCCCCCCTGCGCCCCCACTCCCTAGGAGCGCAGC	GGGGGGGCTGGCCTCGGGCAGCCGCGGCCAACGCCCCCTGCGCCCCCACTCCCTAGGAGCGCAGC
m5C	chr11:73308589(-)	BS-Seq (High)	Human	AP002761.3	rs1310332976	chr11:73308589..73308589	dbSNP153	RBP 1		CGGGGGGGCTGGCCTCGGGCAGCCGCGGCCAACCCCCCCTGCGCCCCCACTCCCTAGGAGCGCAG	CGGGGGGGCTGGCCTCGGGCAGCCGCGGCCAAACCCCCCTGCGCCCCCACTCCCTAGGAGCGCAG
m5C	chr11:73308609(-)	BS-Seq (High)	Human	AP002761.3	rs759051845	chr11:73308609..73308609	dbSNP153	RBP 1		CATAGTGGCGTAACTCACTCCGGGGGGGCTGGCCTCGGGCAGCCGCGGCCAACCCCCCCTGCGCC	CATAGTGGCGTAACTCACTCCGGGGGGGCTGGTCTCGGGCAGCCGCGGCCAACCCCCCCTGCGCC
m5C	chr11:73308613(-)	BS-Seq (High)	Human	AP002761.3	rs765152390	chr11:73308613..73308613	dbSNP153			CCGCCATAGTGGCGTAACTCACTCCGGGGGGGCTGGCCTCGGGCAGCCGCGGCCAACCCCCCCTG	CCGCCATAGTGGCGTAACTCACTCCGGGGGGGTTGGCCTCGGGCAGCCGCGGCCAACCCCCCCTG
m5C	chr11:73308790(-)	BS-Seq (High)	Human	AP002761.3	rs774330282	chr11:73308790..73308790	dbSNP153	RBP 1		CCAGCTTGGACACGCGCCGAGAGGGCTGGCCCCGGGCAGCCGTGGTCGGCCGGCACGAGGCGCGT	CCAGCTTGGACACGCGCCGAGAGGGCTGGCCCTGGGCAGCCGTGGTCGGCCGGCACGAGGCGCGT
m5C	chr11:73308790(-)	BS-Seq (High)	Human	AP002761.3	rs774330282	chr11:73308790..73308790	dbSNP153	RBP 1		CCAGCTTGGACACGCGCCGAGAGGGCTGGCCCCGGGCAGCCGTGGTCGGCCGGCACGAGGCGCGT	CCAGCTTGGACACGCGCCGAGAGGGCTGGCCCGGGGCAGCCGTGGTCGGCCGGCACGAGGCGCGT
m5C	chr11:73308791(-)	BS-Seq (High)	Human	AP002761.3	rs1160766170	chr11:73308791..73308791	dbSNP153	RBP 1		GCCAGCTTGGACACGCGCCGAGAGGGCTGGCCCCGGGCAGCCGTGGTCGGCCGGCACGAGGCGCG	GCCAGCTTGGACACGCGCCGAGAGGGCTGGCCGCGGGCAGCCGTGGTCGGCCGGCACGAGGCGCG
m5C	chr11:73308792(-)	BS-Seq (High)	Human	AP002761.3	rs1345422793	chr11:73308792..73308792	dbSNP153	RBP 1		CGCCAGCTTGGACACGCGCCGAGAGGGCTGGCCCCGGGCAGCCGTGGTCGGCCGGCACGAGGCGC	CGCCAGCTTGGACACGCGCCGAGAGGGCTGGCTCCGGGCAGCCGTGGTCGGCCGGCACGAGGCGC
m5C	chr11:73308928(-)	BS-Seq (High)	Human	AP002761.3	rs1363483645	chr11:73308928..73308928	dbSNP153			GTAAGACGCCTCCGTCTCGGGTCCCAGCGGAGCCGTCGTCCAGACGCGGCGCGTCGAAGCGCCGG	GTAAGACGCCTCCGTCTCGGGTCCCAGCGGAGTCGTCGTCCAGACGCGGCGCGTCGAAGCGCCGG
m5C	chr11:90283823(+)	BS-Seq (High)	Human	DISC1FP1,TUBAP2	rs1226133770	chr11:90283823..90283823	dbSNP153	RBP 1		ACAGCCATTGCTGAGGCCTGGGCTCGCCTGGACCACAAGTTTGACCTGATGTATGCCAAGCGTGC	ACAGCCATTGCTGAGGCCTGGGCTCGCCTGGATCACAAGTTTGACCTGATGTATGCCAAGCGTGC
m5C	chr11:59136173(-)	BS-Seq (High)	Human	FAM111A-DT	rs534570319	chr11:59136173..59136173	dbSNP153	RBP 1		GTGGCAGCCCCCTTTCAGGACAGCTCCCGAGACGAGACGCGAGAGCAGCCCCTAAATCTCACCCA	GTGGCAGCCCCCTTTCAGGACAGCTCCCGAGATGAGACGCGAGAGCAGCCCCTAAATCTCACCCA
m5C	chr11:59136173(-)	BS-Seq (High)	Human	FAM111A-DT	rs534570319	chr11:59136173..59136173	dbSNP153	RBP 1		GTGGCAGCCCCCTTTCAGGACAGCTCCCGAGACGAGACGCGAGAGCAGCCCCTAAATCTCACCCA	GTGGCAGCCCCCTTTCAGGACAGCTCCCGAGAGGAGACGCGAGAGCAGCCCCTAAATCTCACCCA
m5C	chr11:31816630(+)	BS-Seq (High)	Human	AL035078.4,PAUPAR	rs1438208835	chr11:31816630..31816630	dbSNP153	Splice 13		CTCCAGGGAGAGGAACCCGCGGAGGAGAGGATCCCGGCCCAGGTAAGGCGTGCGGCCGGACTGCC	CTCCAGGGAGAGGAACCCGCGGAGGAGAGGATTCCGGCCCAGGTAAGGCGTGCGGCCGGACTGCC
m5C	chr11:31816631(+)	BS-Seq (High)	Human	AL035078.4,PAUPAR	rs1320416937	chr11:31816631..31816631	dbSNP153	Splice 13		TCCAGGGAGAGGAACCCGCGGAGGAGAGGATCCCGGCCCAGGTAAGGCGTGCGGCCGGACTGCCA	TCCAGGGAGAGGAACCCGCGGAGGAGAGGATCTCGGCCCAGGTAAGGCGTGCGGCCGGACTGCCA
m5C	chr11:31816635(+)	BS-Seq (High)	Human	AL035078.4,PAUPAR	rs770835374	chr11:31816635..31816635	dbSNP153	Splice 13		GGGAGAGGAACCCGCGGAGGAGAGGATCCCGGCCCAGGTAAGGCGTGCGGCCGGACTGCCACTGC	GGGAGAGGAACCCGCGGAGGAGAGGATCCCGGTCCAGGTAAGGCGTGCGGCCGGACTGCCACTGC
m5C	chr11:33076978(+)	BS-Seq (High)	Human	TCP11L1,LINC00294	rs1299219699	chr11:33076978..33076978	dbSNP153	circRNA 2		GATCTCCTGACCTCGTGATCCACCCGCCTTGGCCTCCCAAAGTGCTGGGATTGTAGGCGTGAGCC	GATCTCCTGACCTCGTGATCCACCCGCCTTGGACTCCCAAAGTGCTGGGATTGTAGGCGTGAGCC
m5C	chr11:33076982(+)	BS-Seq (High)	Human	TCP11L1,LINC00294	rs912391534	chr11:33076982..33076982	dbSNP153	RBP 1 circRNA 2		TCCTGACCTCGTGATCCACCCGCCTTGGCCTCCCAAAGTGCTGGGATTGTAGGCGTGAGCCACTG	TCCTGACCTCGTGATCCACCCGCCTTGGCCTCGCAAAGTGCTGGGATTGTAGGCGTGAGCCACTG
m5C	chr11:33076982(+)	BS-Seq (High)	Human	TCP11L1,LINC00294	rs912391534	chr11:33076982..33076982	dbSNP153	RBP 1 circRNA 2		TCCTGACCTCGTGATCCACCCGCCTTGGCCTCCCAAAGTGCTGGGATTGTAGGCGTGAGCCACTG	TCCTGACCTCGTGATCCACCCGCCTTGGCCTCTCAAAGTGCTGGGATTGTAGGCGTGAGCCACTG
m5C	chr11:1995503(-)	BS-Seq (High)	Human	H19	rs551634894	chr11:1995503..1995503	ICGC	RBP 2 miRNA 4 circRNA 4		GAGATTCAAAGCCTCCACGACTCTGTTTCCCCCGTCCCTTCTGAATTTAATTTGCACTAAGTCAT	GAGATTCAAAGCCTCCACGACTCTGTTTCCCCTGTCCCTTCTGAATTTAATTTGCACTAAGTCAT
m5C	chr11:73308587(-)	BS-Seq (High)	Human	AP002761.3	-	chr11:73308587..73308587	ICGC	RBP 1		GGGGGGCTGGCCTCGGGCAGCCGCGGCCAACCCCCCCTGCGCCCCCACTCCCTAGGAGCGCAGCG	GGGGGGCTGGCCTCGGGCAGCCGCGGCCAACCTCCCCTGCGCCCCCACTCCCTAGGAGCGCAGCG
m5C	chr11:6612134(-)	BS-Seq (High)	Human	AC091564.7,TAF10	-	chr11:6612120..6612135	ICGC	RBP 3 miRNA 2 circRNA 2		GGACCCCGAGGCGGCGCCGGCCTCCGCCGCCTCGGCCCCGGGCCCCGCGCCCCCGGTCTCGGCTC	GGACCCCGAGGCGGCGCCGGCCTCCGCCGCC_______________GCGCCCCCGGTCTCGGCTC
m5C	chr11:46869078(+)	BS-Seq (High)	Human	LRP4-AS1	-	chr11:46869078..46869078	TCGA,ICGC			CACTGTCTCCTTGTTCCGGCCTGAGTATTTGTCAACACGCTGGATTGACTTGGTCTGCCAGTCTG	CACTGTCTCCTTGTTCCGGCCTGAGTATTTGTTAACACGCTGGATTGACTTGGTCTGCCAGTCTG
m5C	chr11:6611822(-)	BS-Seq (High)	Human	AC091564.7,TAF10	rs747279291	chr11:6611820..6611823	ICGC	RBP 6 circRNA 2		CCACCTCTGTGTCTCATTTTGCTGGTTCTCCTCCAGCTCCGGTGTCGGCGGGTGGCGCGGCGCCC	CCACCTCTGTGTCTCATTTTGCTGGTTCTCC___AGCTCCGGTGTCGGCGGGTGGCGCGGCGCCC
m5C	chr11:19235049(+)	BS-Seq (High)	Human	CSRP3-AS1	rs1212690643	chr11:19235049..19235049	TCGA,ICGC,COSMIC			CTAGGACGTTCACGATATCGTAAATGCGTCGACGTTCAACATCTACAAAGAATGTGCAATTGTGT	CTAGGACGTTCACGATATCGTAAATGCGTCGATGTTCAACATCTACAAAGAATGTGCAATTGTGT
m5C	chr11:1997387(-)	BS-Seq (High)	Human	H19	-	chr11:1997387..1997387	ICGC	RBP 1 miRNA 4 circRNA 4		GGACCCCATCTGCCGGGCAGGTGAGTCCCTTCCCTCCCCAGGCCTCGCTTCCCCAGCCTTCTGAA	GGACCCCATCTGCCGGGCAGGTGAGTCCCTTCTCTCCCCAGGCCTCGCTTCCCCAGCCTTCTGAA
m5C	chr11:12962277(-)	BS-Seq (High)	Human	LINC00958	rs965293656	chr11:12962277..12962277	ICGC			CGGGCTCAGGTGATCCTCCCACCTGAGCCTCCCGAGTAGCTGGGACTACAGATGCACACCACCAT	CGGGCTCAGGTGATCCTCCCACCTGAGCCTCCTGAGTAGCTGGGACTACAGATGCACACCACCAT
m5C	chr12:103759228(-)	BS-Seq (High)	Human	AC025265.1	rs2271636	chr12:103759228..103759228	dbSNP153,HGVD	RBP 1	GWAS_ID_15415	TCCTGGCTGGCAGTGATGAGCAGCTTGCTTCCCAGCCTCGTTTGCAGGGTGGTGCCATTGACAAG	TCCTGGCTGGCAGTGATGAGCAGCTTGCTTCCAAGCCTCGTTTGCAGGGTGGTGCCATTGACAAG
m5C	chr12:103761342(-)	BS-Seq (High)	Human	AC025265.1	rs1370210941	chr12:103761342..103761342	dbSNP153			GACATGAATGATCCCATTGGAGGCAAAGATGTCCCACTGCAGAATGGCTCTTCCATCAACAAACC	GACATGAATGATCCCATTGGAGGCAAAGATGTGCCACTGCAGAATGGCTCTTCCATCAACAAACC
m5C	chr12:95473957(-)	BS-Seq (High)	Human	lnc-USP44-3	rs1358424755	chr12:95473957..95473957	dbSNP153			CCCGCCTGGCTGGAGTCGACTGGGGCCAGACCCGACTGCTTCGTCCGGTGCCTCGGGCATTCCCG	CCCGCCTGGCTGGAGTCGACTGGGGCCAGACCAGACTGCTTCGTCCGGTGCCTCGGGCATTCCCG
m5C	chr12:98515819(-)	BS-Seq (High)	Human	TMPO-AS1	rs954222614	chr12:98515808..98515820	dbSNP153	RBP 1 Splice 2		GCCCCCTCCCCACAGCCTTTGCCGCCGCCGCTCACGCCGGCGCGCTTGCTCCTGGCCGGGGACCG	GCCCCCTCCCCACAGCCTTTGCCGCCGCCGC____________GCTTGCTCCTGGCCGGGGACCG
m5C	chr12:98515824(-)	BS-Seq (High)	Human	TMPO-AS1	rs1226741666	chr12:98515812..98515824	dbSNP153	RBP 2 Splice 2		GCGAAGCCCCCTCCCCACAGCCTTTGCCGCCGCCGCTCACGCCGGCGCGCTTGCTCCTGGCCGGG	GCGAAGCCCCCTCCCCACAGCCTTTGCCGCCG____________GCGCGCTTGCTCCTGGCCGGG
m5C	chr12:98515823(-)	BS-Seq (High)	Human	TMPO-AS1	rs1226741666	chr12:98515812..98515824	dbSNP153	RBP 2 Splice 2		CGAAGCCCCCTCCCCACAGCCTTTGCCGCCGCCGCTCACGCCGGCGCGCTTGCTCCTGGCCGGGG	CGAAGCCCCCTCCCCACAGCCTTTGCCGCCG____________GCGCGCTTGCTCCTGGCCGGGG
m5C	chr12:98515815(-)	BS-Seq (High)	Human	TMPO-AS1	rs1389793385	chr12:98515815..98515815	dbSNP153	RBP 1 Splice 2		CCTCCCCACAGCCTTTGCCGCCGCCGCTCACGCCGGCGCGCTTGCTCCTGGCCGGGGACCGCGCT	CCTCCCCACAGCCTTTGCCGCCGCCGCTCACGGCGGCGCGCTTGCTCCTGGCCGGGGACCGCGCT
m5C	chr12:98515817(-)	BS-Seq (High)	Human	TMPO-AS1	rs1565801046	chr12:98515817..98515817	dbSNP153	RBP 2 Splice 2		CCCCTCCCCACAGCCTTTGCCGCCGCCGCTCACGCCGGCGCGCTTGCTCCTGGCCGGGGACCGCG	CCCCTCCCCACAGCCTTTGCCGCCGCCGCTCAGGCCGGCGCGCTTGCTCCTGGCCGGGGACCGCG
m5C	chr12:98515821(-)	BS-Seq (High)	Human	TMPO-AS1	rs755207935	chr12:98515821..98515821	dbSNP153	RBP 1 Splice 2		AAGCCCCCTCCCCACAGCCTTTGCCGCCGCCGCTCACGCCGGCGCGCTTGCTCCTGGCCGGGGAC	AAGCCCCCTCCCCACAGCCTTTGCCGCCGCCGGTCACGCCGGCGCGCTTGCTCCTGGCCGGGGAC
m5C	chr12:98515948(-)	BS-Seq (High)	Human	TMPO-AS1	rs549257131	chr12:98515948..98515948	dbSNP153		Clinvar_Rec_911,Clinvar_Rec_14381	ACGTACACGTCTTTGCGCTGCTCCCCGGCCGGCAGCGTCACATTGTTGGCGACCAACTCACTCTT	ACGTACACGTCTTTGCGCTGCTCCCCGGCCGGTAGCGTCACATTGTTGGCGACCAACTCACTCTT
m5C	chr12:98515948(-)	BS-Seq (High)	Human	TMPO-AS1	rs549257131	chr12:98515948..98515948	dbSNP153		Clinvar_Rec_911,Clinvar_Rec_14381	ACGTACACGTCTTTGCGCTGCTCCCCGGCCGGCAGCGTCACATTGTTGGCGACCAACTCACTCTT	ACGTACACGTCTTTGCGCTGCTCCCCGGCCGGAAGCGTCACATTGTTGGCGACCAACTCACTCTT
m5C	chr12:98515951(-)	BS-Seq (High)	Human	TMPO-AS1	rs199549942	chr12:98515951..98515951	dbSNP153	RBP 1		TGGACGTACACGTCTTTGCGCTGCTCCCCGGCCGGCAGCGTCACATTGTTGGCGACCAACTCACT	TGGACGTACACGTCTTTGCGCTGCTCCCCGGCTGGCAGCGTCACATTGTTGGCGACCAACTCACT
m5C	chr12:98515952(-)	BS-Seq (High)	Human	TMPO-AS1	rs1174108011	chr12:98515952..98515952	dbSNP153	RBP 1		CTGGACGTACACGTCTTTGCGCTGCTCCCCGGCCGGCAGCGTCACATTGTTGGCGACCAACTCAC	CTGGACGTACACGTCTTTGCGCTGCTCCCCGGTCGGCAGCGTCACATTGTTGGCGACCAACTCAC
m5C	chr12:98515955(-)	BS-Seq (High)	Human	TMPO-AS1	rs1555201569	chr12:98515955..98515955	dbSNP153	RBP 1	Clinvar_Rec_912	GAGCTGGACGTACACGTCTTTGCGCTGCTCCCCGGCCGGCAGCGTCACATTGTTGGCGACCAACT	GAGCTGGACGTACACGTCTTTGCGCTGCTCCCGGGCCGGCAGCGTCACATTGTTGGCGACCAACT
m5C	chr12:98515960(-)	BS-Seq (High)	Human	TMPO-AS1	rs1460262714	chr12:98515960..98515960	dbSNP153	RBP 1		AGGTAGAGCTGGACGTACACGTCTTTGCGCTGCTCCCCGGCCGGCAGCGTCACATTGTTGGCGAC	AGGTAGAGCTGGACGTACACGTCTTTGCGCTGTTCCCCGGCCGGCAGCGTCACATTGTTGGCGAC
m5C	chr12:98516020(-)	BS-Seq (High)	Human	TMPO-AS1	rs755323971	chr12:98516020..98516020	dbSNP153	RBP 5 Splice 2		GGCCCCTTGCTGTTGGTGCCGGCGGGGAGCGGCGGCCGGTTGCGAGCCGTGAGGTGCTGCAGGTA	GGCCCCTTGCTGTTGGTGCCGGCGGGGAGCGGTGGCCGGTTGCGAGCCGTGAGGTGCTGCAGGTA
m5C	chr12:98516030(-)	BS-Seq (High)	Human	TMPO-AS1	rs868495691	chr12:98516030..98516030	dbSNP153	RBP 5 Splice 2		GAAGTCCGGGGGCCCCTTGCTGTTGGTGCCGGCGGGGAGCGGCGGCCGGTTGCGAGCCGTGAGGT	GAAGTCCGGGGGCCCCTTGCTGTTGGTGCCGGTGGGGAGCGGCGGCCGGTTGCGAGCCGTGAGGT
m5C	chr12:52180959(+)	BS-Seq (High)	Human	LINC00592	rs1162979144	chr12:52180959..52180959	dbSNP153			CTCCATGTCTGTGCGCTTGGAGATCTCATCCTCATACCTGGGAGGGAGAGAGGGGTTGCTCAGCT	CTCCATGTCTGTGCGCTTGGAGATCTCATCCTTATACCTGGGAGGGAGAGAGGGGTTGCTCAGCT
m5C	chr12:52206581(+)	BS-Seq (High)	Human	LINC00592	rs564899613	chr12:52206581..52206581	dbSNP153			TGGAAATGTGGTGTGGCCTTGAGCCAGGTCCCCCTCTCCAGGGTTTTGGCCCAGTTTTGGCCTGT	TGGAAATGTGGTGTGGCCTTGAGCCAGGTCCCGCTCTCCAGGGTTTTGGCCCAGTTTTGGCCTGT
m5C	chr12:52206581(+)	BS-Seq (High)	Human	LINC00592	rs564899613	chr12:52206581..52206581	dbSNP153			TGGAAATGTGGTGTGGCCTTGAGCCAGGTCCCCCTCTCCAGGGTTTTGGCCCAGTTTTGGCCTGT	TGGAAATGTGGTGTGGCCTTGAGCCAGGTCCCTCTCTCCAGGGTTTTGGCCCAGTTTTGGCCTGT
m5C	chr12:52208194(-)	BS-Seq (High)	Human	LINC02874	rs765786413	chr12:52208194..52208194	dbSNP153	Splice 3		GGCGCCAAGCCCAGAGCTCCAACATGCACCTGCCACAGCTCCAGGGGAGATCGGGGGCCTGCCAA	GGCGCCAAGCCCAGAGCTCCAACATGCACCTGTCACAGCTCCAGGGGAGATCGGGGGCCTGCCAA
m5C	chr12:52208194(-)	BS-Seq (High)	Human	LINC02874	rs765786413	chr12:52208194..52208194	dbSNP153	Splice 3		GGCGCCAAGCCCAGAGCTCCAACATGCACCTGCCACAGCTCCAGGGGAGATCGGGGGCCTGCCAA	GGCGCCAAGCCCAGAGCTCCAACATGCACCTGACACAGCTCCAGGGGAGATCGGGGGCCTGCCAA
m5C	chr12:52212089(-)	BS-Seq (High)	Human	LINC02874	rs1456174819	chr12:52212089..52212089	dbSNP153			TCTTCAGATGAGAACACTGAGGCTCGGCGAGGCGACAAGTCTTTCTGAGGGCCAGTGGAGCAGAC	TCTTCAGATGAGAACACTGAGGCTCGGCGAGGTGACAAGTCTTTCTGAGGGCCAGTGGAGCAGAC
m5C	chr12:52245517(-)	BS-Seq (High)	Human	KRT7-AS	rs1199443524	chr12:52245517..52245517	dbSNP153			CTCACGCAGCTGCCGTGCCATATCCTGCTTGCCCCGCTGCAGGGCGGCTTCCAGCTCCTCCTGCT	CTCACGCAGCTGCCGTGCCATATCCTGCTTGCTCCGCTGCAGGGCGGCTTCCAGCTCCTCCTGCT
m5C	chr12:52308358(-)	BS-Seq (High)	Human	AC121757.1	rs781724720	chr12:52308357..52308358	dbSNP153	circRNA 4		AGACGGAGGCGCGCGTCAGGCGCAGCCGCGACCTGGGTGAGTGGCTTTGCTGCGAGCCCACGCGC	AGACGGAGGCGCGCGTCAGGCGCAGCCGCGAC_TGGGTGAGTGGCTTTGCTGCGAGCCCACGCGC
m5C	chr12:52308479(-)	BS-Seq (High)	Human	lnc-KRT81-1	rs1389790138	chr12:52308479..52308479	dbSNP153			CCACGTTGCTGTTGCTGGGGACGCTACTGACTCTGGTGGAGACAACAGGGGCAGTAGTGGAGGCG	CCACGTTGCTGTTGCTGGGGACGCTACTGACTTTGGTGGAGACAACAGGGGCAGTAGTGGAGGCG
m5C	chr12:53452156(+)	BS-Seq (High)	Human	PCBP2,AC023509.1	rs1224183875	chr12:53452156..53452156	dbSNP153	RBP 2 circRNA 2		CCGGAGCAGCCGCAGCCTGCGCCCTCTCCCGCCCGCCCGCCCTCCGCCCGCCCGCCCGCCCTCCG	CCGGAGCAGCCGCAGCCTGCGCCCTCTCCCGCTCGCCCGCCCTCCGCCCGCCCGCCCGCCCTCCG
m5C	chr12:53452352(+)	BS-Seq (High)	Human	PCBP2,AC023509.1	rs1224803225	chr12:53452352..53452352	dbSNP153	RBP 24 Splice 8 circRNA 2		CCGCCCTTCCCCTTCCCGCCCGCTCCCCTTTTCCCCTCAGTCGCCTCGCGCCTGCAGGTAAGCCT	CCGCCCTTCCCCTTCCCGCCCGCTCCCCTTTTTCCCTCAGTCGCCTCGCGCCTGCAGGTAAGCCT
m5C	chr12:53452357(+)	BS-Seq (High)	Human	PCBP2,AC023509.1	rs553682361	chr12:53452357..53452357	dbSNP153	RBP 24 Splice 8 circRNA 2		CTTCCCCTTCCCGCCCGCTCCCCTTTTCCCCTCAGTCGCCTCGCGCCTGCAGGTAAGCCTAAAAA	CTTCCCCTTCCCGCCCGCTCCCCTTTTCCCCTAAGTCGCCTCGCGCCTGCAGGTAAGCCTAAAAA
m5C	chr12:53452357(+)	BS-Seq (High)	Human	PCBP2,AC023509.1	rs553682361	chr12:53452357..53452357	dbSNP153	RBP 24 Splice 8 circRNA 2		CTTCCCCTTCCCGCCCGCTCCCCTTTTCCCCTCAGTCGCCTCGCGCCTGCAGGTAAGCCTAAAAA	CTTCCCCTTCCCGCCCGCTCCCCTTTTCCCCTTAGTCGCCTCGCGCCTGCAGGTAAGCCTAAAAA
m5C	chr12:53455876(+)	BS-Seq (High)	Human	PCBP2,AC023509.1	rs151048021	chr12:53455876..53455876	dbSNP153	RBP 5 circRNA 17		TTCTTTGTTTTAACTTCTTTTGGATCTTGTTTCCTATCTAGAGTGGTGCACGTATCAACATCTCA	TTCTTTGTTTTAACTTCTTTTGGATCTTGTTTGCTATCTAGAGTGGTGCACGTATCAACATCTCA
m5C	chr12:53455881(+)	BS-Seq (High)	Human	PCBP2,AC023509.1	rs2139775	chr12:53455881..53455881	dbSNP153	RBP 6 circRNA 17		TGTTTTAACTTCTTTTGGATCTTGTTTCCTATCTAGAGTGGTGCACGTATCAACATCTCAGAAGG	TGTTTTAACTTCTTTTGGATCTTGTTTCCTATATAGAGTGGTGCACGTATCAACATCTCAGAAGG
m5C	chr12:53462486(+)	BS-Seq (High)	Human	PCBP2,AC023509.1	rs1311757794	chr12:53462486..53462486	dbSNP153	RBP 13 Splice 19 miRNA 12 circRNA 27		TATCTCTTTTTGTTTTTTTCCCCTCTGACTCTCTCCCAGTCCCCCCCGAAGGGCGTGACCATCCC	TATCTCTTTTTGTTTTTTTCCCCTCTGACTCTTTCCCAGTCCCCCCCGAAGGGCGTGACCATCCC
m5C	chr12:56169544(-)	BS-Seq (High)	Human	AC073896.4,SMARCC2	rs1175992326	chr12:56169541..56169544	dbSNP153	RBP 7 Splice 5 circRNA 7		TCCACCGCTGCTGCCGCCGCCCTGGCCGCCGCCGCAGTGAAAGCTAAGGTGAGGCCAGACCTTGA	TCCACCGCTGCTGCCGCCGCCCTGGCCGCCGC___AGTGAAAGCTAAGGTGAGGCCAGACCTTGA
m5C	chr12:56169556(-)	BS-Seq (High)	Human	AC073896.4,SMARCC2	rs1466809320	chr12:56169541..56169556	dbSNP153	RBP 11 Splice 5 circRNA 7		GAGGGCAACCTCTCCACCGCTGCTGCCGCCGCCCTGGCCGCCGCCGCAGTGAAAGCTAAGGTGAG	GAGGGCAACCTCTCCACCGCTGCTGCCGCCGC_______________AGTGAAAGCTAAGGTGAG
m5C	chr12:56169544(-)	BS-Seq (High)	Human	AC073896.4,SMARCC2	rs200925749	chr12:56169544..56169544	dbSNP153	RBP 7 Splice 5 circRNA 7		TCCACCGCTGCTGCCGCCGCCCTGGCCGCCGCCGCAGTGAAAGCTAAGGTGAGGCCAGACCTTGA	TCCACCGCTGCTGCCGCCGCCCTGGCCGCCGCTGCAGTGAAAGCTAAGGTGAGGCCAGACCTTGA
m5C	chr12:56169547(-)	BS-Seq (High)	Human	AC073896.4,SMARCC2	rs758834791	chr12:56169547..56169547	dbSNP153	RBP 8 Splice 5 circRNA 7		CTCTCCACCGCTGCTGCCGCCGCCCTGGCCGCCGCCGCAGTGAAAGCTAAGGTGAGGCCAGACCT	CTCTCCACCGCTGCTGCCGCCGCCCTGGCCGCTGCCGCAGTGAAAGCTAAGGTGAGGCCAGACCT
m5C	chr12:56169547(-)	BS-Seq (High)	Human	AC073896.4,SMARCC2	rs758834791	chr12:56169547..56169547	dbSNP153	RBP 8 Splice 5 circRNA 7		CTCTCCACCGCTGCTGCCGCCGCCCTGGCCGCCGCCGCAGTGAAAGCTAAGGTGAGGCCAGACCT	CTCTCCACCGCTGCTGCCGCCGCCCTGGCCGCGGCCGCAGTGAAAGCTAAGGTGAGGCCAGACCT
m5C	chr12:56169550(-)	BS-Seq (High)	Human	AC073896.4,SMARCC2	rs150104273	chr12:56169550..56169550	dbSNP153	RBP 10 Splice 5 circRNA 7		AACCTCTCCACCGCTGCTGCCGCCGCCCTGGCCGCCGCCGCAGTGAAAGCTAAGGTGAGGCCAGA	AACCTCTCCACCGCTGCTGCCGCCGCCCTGGCTGCCGCCGCAGTGAAAGCTAAGGTGAGGCCAGA
m5C	chr12:56169559(-)	BS-Seq (High)	Human	AC073896.4,SMARCC2	rs138460781	chr12:56169559..56169559	dbSNP153	RBP 13 Splice 5 circRNA 7		GGCGAGGGCAACCTCTCCACCGCTGCTGCCGCCGCCCTGGCCGCCGCCGCAGTGAAAGCTAAGGT	GGCGAGGGCAACCTCTCCACCGCTGCTGCCGCTGCCCTGGCCGCCGCCGCAGTGAAAGCTAAGGT
m5C	chr12:56169562(-)	BS-Seq (High)	Human	AC073896.4,SMARCC2	rs17852368	chr12:56169562..56169562	dbSNP153,HGVD	RBP 13 Splice 5 miRNA 2 circRNA 7		ATTGGCGAGGGCAACCTCTCCACCGCTGCTGCCGCCGCCCTGGCCGCCGCCGCAGTGAAAGCTAA	ATTGGCGAGGGCAACCTCTCCACCGCTGCTGCTGCCGCCCTGGCCGCCGCCGCAGTGAAAGCTAA
m5C	chr12:56169563(-)	BS-Seq (High)	Human	AC073896.4,SMARCC2	rs1337318055	chr12:56169563..56169563	dbSNP153	RBP 13 Splice 5 miRNA 2 circRNA 7		CATTGGCGAGGGCAACCTCTCCACCGCTGCTGCCGCCGCCCTGGCCGCCGCCGCAGTGAAAGCTA	CATTGGCGAGGGCAACCTCTCCACCGCTGCTGTCGCCGCCCTGGCCGCCGCCGCAGTGAAAGCTA
m5C	chr12:56185102(-)	BS-Seq (High)	Human	AC073896.4,SMARCC2	rs1430827465	chr12:56185102..56185102	dbSNP153	RBP 3 Splice 13 circRNA 14		CTAGATTATTGCCTCTTCACAAGGCGGCGTTACGATTTCCAGAATCCATCACGCATGGACCGCAA	CTAGATTATTGCCTCTTCACAAGGCGGCGTTATGATTTCCAGAATCCATCACGCATGGACCGCAA
m5C	chr12:1505929(+)	BS-Seq (High)	Human	LINC00942,LINC00942:2,LINC00942:3	rs987837964	chr12:1505929..1505929	dbSNP153			AAAATCAAACAGCCTGGGCACAGTGGCTCACGCCTGTGATCCCAGCACTTTAGGAGGCCGAGGTG	AAAATCAAACAGCCTGGGCACAGTGGCTCACGGCTGTGATCCCAGCACTTTAGGAGGCCGAGGTG
m5C	chr12:1505937(+)	BS-Seq (High)	Human	LINC00942,LINC00942:2,LINC00942:3	rs1565561995	chr12:1505936..1505937	dbSNP153			ACAGCCTGGGCACAGTGGCTCACGCCTGTGATCCCAGCACTTTAGGAGGCCGAGGTGTGCGGATC	ACAGCCTGGGCACAGTGGCTCACGCCTGTGAT_CCAGCACTTTAGGAGGCCGAGGTGTGCGGATC
m5C	chr12:1505942(+)	BS-Seq (High)	Human	LINC00942,LINC00942:2,LINC00942:3	rs981529415	chr12:1505942..1505942	dbSNP153			CTGGGCACAGTGGCTCACGCCTGTGATCCCAGCACTTTAGGAGGCCGAGGTGTGCGGATCACCTG	CTGGGCACAGTGGCTCACGCCTGTGATCCCAGAACTTTAGGAGGCCGAGGTGTGCGGATCACCTG
m5C	chr12:1506075(+)	BS-Seq (High)	Human	LINC00942,LINC00942:2,LINC00942:3	rs867561270	chr12:1506075..1506075	dbSNP153			TTAGCTGGGCATGGTGGTGCATACCTGTAGTCCCAGCTATACGGGAGGCTGAGGCAGGAGAACTG	TTAGCTGGGCATGGTGGTGCATACCTGTAGTCACAGCTATACGGGAGGCTGAGGCAGGAGAACTG
m5C	chr12:1506091(+)	BS-Seq (High)	Human	LINC00942,LINC00942:2,LINC00942:3	rs1464714907	chr12:1506091..1506091	dbSNP153			GTGCATACCTGTAGTCCCAGCTATACGGGAGGCTGAGGCAGGAGAACTGCTTGAATTCGGGAGGT	GTGCATACCTGTAGTCCCAGCTATACGGGAGGTTGAGGCAGGAGAACTGCTTGAATTCGGGAGGT
m5C	chr12:1506097(+)	BS-Seq (High)	Human	LINC00942,LINC00942:2,LINC00942:3	rs1003004279	chr12:1506097..1506097	dbSNP153			ACCTGTAGTCCCAGCTATACGGGAGGCTGAGGCAGGAGAACTGCTTGAATTCGGGAGGTGAAGGT	ACCTGTAGTCCCAGCTATACGGGAGGCTGAGGAAGGAGAACTGCTTGAATTCGGGAGGTGAAGGT
m5C	chr12:1506097(+)	BS-Seq (High)	Human	LINC00942,LINC00942:2,LINC00942:3	rs1003004279	chr12:1506097..1506097	dbSNP153			ACCTGTAGTCCCAGCTATACGGGAGGCTGAGGCAGGAGAACTGCTTGAATTCGGGAGGTGAAGGT	ACCTGTAGTCCCAGCTATACGGGAGGCTGAGGTAGGAGAACTGCTTGAATTCGGGAGGTGAAGGT
m5C	chr12:1929805(-)	BS-Seq (High)	Human	LINC00940	rs1457015634	chr12:1929782..1929806	dbSNP153			CTTCCTCCTCCTTCCCCTTCCTCCTCCTCCTCCCCCTCTTCTTCCTCCTTCTCCTATCCTCTTTT	CTTCCTCCTCCTTCCCCTTCCTCCTCCTCCT________________________ATCCTCTTTT
m5C	chr12:1929806(-)	BS-Seq (High)	Human	LINC00940	rs1457015634	chr12:1929782..1929806	dbSNP153			TCTTCCTCCTCCTTCCCCTTCCTCCTCCTCCTCCCCCTCTTCTTCCTCCTTCTCCTATCCTCTTT	TCTTCCTCCTCCTTCCCCTTCCTCCTCCTCCT________________________ATCCTCTTT
m5C	chr12:1929794(-)	BS-Seq (High)	Human	LINC00940	rs948758011	chr12:1929794..1929794	dbSNP153			TTCCCCTTCCTCCTCCTCCTCCCCCTCTTCTTCCTCCTTCTCCTATCCTCTTTTTCTTCCTCAAC	TTCCCCTTCCTCCTCCTCCTCCCCCTCTTCTTGCTCCTTCTCCTATCCTCTTTTTCTTCCTCAAC
m5C	chr12:1929803(-)	BS-Seq (High)	Human	LINC00940	rs1045702628	chr12:1929801..1929804	dbSNP153			TCCTCCTCCTTCCCCTTCCTCCTCCTCCTCCCCCTCTTCTTCCTCCTTCTCCTATCCTCTTTTTC	TCCTCCTCCTTCCCCTTCCTCCTCCTCCTCC___TCTTCTTCCTCCTTCTCCTATCCTCTTTTTC
m5C	chr12:1929804(-)	BS-Seq (High)	Human	LINC00940	rs1045702628	chr12:1929801..1929804	dbSNP153			TTCCTCCTCCTTCCCCTTCCTCCTCCTCCTCCCCCTCTTCTTCCTCCTTCTCCTATCCTCTTTTT	TTCCTCCTCCTTCCCCTTCCTCCTCCTCCTCC___TCTTCTTCCTCCTTCTCCTATCCTCTTTTT
m5C	chr12:1929804(-)	BS-Seq (High)	Human	LINC00940	rs1045702628	chr12:1929801..1929804	dbSNP153			TTCCTCCTCCTTCCCCTTCCTCCTCCTCCTCCCCCTCTTCTTCCTCCTTCTCCTATCCTCTTTTT	TTCCTCCTCCTTCCCCTTCCTCCTCCTCCTCC_CCTCTTCTTCCTCCTTCTCCTATCCTCTTTTT
m5C	chr12:1929806(-)	BS-Seq (High)	Human	LINC00940	rs1368566338	chr12:1929804..1929807	dbSNP153			TCTTCCTCCTCCTTCCCCTTCCTCCTCCTCCTCCCCCTCTTCTTCCTCCTTCTCCTATCCTCTTT	TCTTCCTCCTCCTTCCCCTTCCTCCTCCTCC___CCCTCTTCTTCCTCCTTCTCCTATCCTCTTT
m5C	chr12:1929809(-)	BS-Seq (High)	Human	LINC00940	rs1300189859	chr12:1929809..1929809	dbSNP153			TCTTCTTCCTCCTCCTTCCCCTTCCTCCTCCTCCTCCCCCTCTTCTTCCTCCTTCTCCTATCCTC	TCTTCTTCCTCCTCCTTCCCCTTCCTCCTCCTTCTCCCCCTCTTCTTCCTCCTTCTCCTATCCTC
m5C	chr12:1929848(-)	BS-Seq (High)	Human	LINC00940	rs1565752013	chr12:1929809..1929849	dbSNP153			CCTCTTCCTCCTCCTCCTCCTCCCCCTTCCTTCTCCTCCTCTTCTTCCTCCTCCTTCCCCTTCCT	CCTCTTCCTCCTCCTCCTCCTCCCCCTTCCTT_________________________________
m5C	chr12:1929811(-)	BS-Seq (High)	Human	LINC00940	rs530565442	chr12:1929811..1929811	dbSNP153			CCTCTTCTTCCTCCTCCTTCCCCTTCCTCCTCCTCCTCCCCCTCTTCTTCCTCCTTCTCCTATCC	CCTCTTCTTCCTCCTCCTTCCCCTTCCTCCTCGTCCTCCCCCTCTTCTTCCTCCTTCTCCTATCC
m5C	chr12:1929812(-)	BS-Seq (High)	Human	LINC00940	rs79802812	chr12:1929812..1929812	dbSNP153			TCCTCTTCTTCCTCCTCCTTCCCCTTCCTCCTCCTCCTCCCCCTCTTCTTCCTCCTTCTCCTATC	TCCTCTTCTTCCTCCTCCTTCCCCTTCCTCCTTCTCCTCCCCCTCTTCTTCCTCCTTCTCCTATC
m5C	chr12:1929815(-)	BS-Seq (High)	Human	LINC00940	rs1319104104	chr12:1929815..1929815	dbSNP153			TCCTCCTCTTCTTCCTCCTCCTTCCCCTTCCTCCTCCTCCTCCCCCTCTTCTTCCTCCTTCTCCT	TCCTCCTCTTCTTCCTCCTCCTTCCCCTTCCTTCTCCTCCTCCCCCTCTTCTTCCTCCTTCTCCT
m5C	chr12:1929817(-)	BS-Seq (High)	Human	LINC00940	rs1390026397	chr12:1929817..1929817	dbSNP153			TCTCCTCCTCTTCTTCCTCCTCCTTCCCCTTCCTCCTCCTCCTCCCCCTCTTCTTCCTCCTTCTC	TCTCCTCCTCTTCTTCCTCCTCCTTCCCCTTCTTCCTCCTCCTCCCCCTCTTCTTCCTCCTTCTC
m5C	chr12:1929858(-)	BS-Seq (High)	Human	LINC00940	rs1565752031	chr12:1929825..1929859	dbSNP153			TTCCTCCTCCCCTCTTCCTCCTCCTCCTCCTCCCCCTTCCTTCTCCTCCTCTTCTTCCTCCTCCT	TTCCTCCTCCCCTCTTCCTCCTCCTCCTCCTC_________________________________
m5C	chr12:1929859(-)	BS-Seq (High)	Human	LINC00940	rs1565752031	chr12:1929825..1929859	dbSNP153			CTTCCTCCTCCCCTCTTCCTCCTCCTCCTCCTCCCCCTTCCTTCTCCTCCTCTTCTTCCTCCTCC	CTTCCTCCTCCCCTCTTCCTCCTCCTCCTCCTC________________________________
m5C	chr12:1929843(-)	BS-Seq (High)	Human	LINC00940	rs1358762496	chr12:1929825..1929843	dbSNP153			TCCTCCTCCTCCTCCTCCCCCTTCCTTCTCCTCCTCTTCTTCCTCCTCCTTCCCCTTCCTCCTCC	TCCTCCTCCTCCTCCTCCCCCTTCCTTCTCCT__________________TCCCCTTCCTCCTCC
m5C	chr12:1929842(-)	BS-Seq (High)	Human	LINC00940	rs1358762496	chr12:1929825..1929843	dbSNP153			CCTCCTCCTCCTCCTCCCCCTTCCTTCTCCTCCTCTTCTTCCTCCTCCTTCCCCTTCCTCCTCCT	CCTCCTCCTCCTCCTCCCCCTTCCTTCTCCT__________________TCCCCTTCCTCCTCCT
m5C	chr12:1929843(-)	BS-Seq (High)	Human	LINC00940	rs1358762496	chr12:1929825..1929843	dbSNP153			TCCTCCTCCTCCTCCTCCCCCTTCCTTCTCCTCCTCTTCTTCCTCCTCCTTCCCCTTCCTCCTCC	TCCTCCTCCTCCTCCTCCCCCTTCCTTCTCCT_______________CCTTCCCCTTCCTCCTCC
m5C	chr12:1929842(-)	BS-Seq (High)	Human	LINC00940	rs1358762496	chr12:1929825..1929843	dbSNP153			CCTCCTCCTCCTCCTCCCCCTTCCTTCTCCTCCTCTTCTTCCTCCTCCTTCCCCTTCCTCCTCCT	CCTCCTCCTCCTCCTCCCCCTTCCTTCTCCT_______________CCTTCCCCTTCCTCCTCCT
m5C	chr12:1929827(-)	BS-Seq (High)	Human	LINC00940	rs1299299657	chr12:1929827..1929827	dbSNP153			CCCCCTTCCTTCTCCTCCTCTTCTTCCTCCTCCTTCCCCTTCCTCCTCCTCCTCCCCCTCTTCTT	CCCCCTTCCTTCTCCTCCTCTTCTTCCTCCTCTTTCCCCTTCCTCCTCCTCCTCCCCCTCTTCTT
m5C	chr12:1929842(-)	BS-Seq (High)	Human	LINC00940	rs769850545	chr12:1929839..1929842	dbSNP153			CCTCCTCCTCCTCCTCCCCCTTCCTTCTCCTCCTCTTCTTCCTCCTCCTTCCCCTTCCTCCTCCT	CCTCCTCCTCCTCCTCCCCCTTCCTTCTCCTC___TTCTTCCTCCTCCTTCCCCTTCCTCCTCCT
m5C	chr12:1929846(-)	BS-Seq (High)	Human	LINC00940	rs1186594387	chr12:1929846..1929846	dbSNP153			TCTTCCTCCTCCTCCTCCTCCCCCTTCCTTCTCCTCCTCTTCTTCCTCCTCCTTCCCCTTCCTCC	TCTTCCTCCTCCTCCTCCTCCCCCTTCCTTCTACTCCTCTTCTTCCTCCTCCTTCCCCTTCCTCC
m5C	chr12:1929851(-)	BS-Seq (High)	Human	LINC00940	rs1290087339	chr12:1929847..1929851	dbSNP153			TCCCCTCTTCCTCCTCCTCCTCCTCCCCCTTCCTTCTCCTCCTCTTCTTCCTCCTCCTTCCCCTT	TCCCCTCTTCCTCCTCCTCCTCCTCCCCCTTC____TCCTCCTCTTCTTCCTCCTCCTTCCCCTT
m5C	chr12:1929848(-)	BS-Seq (High)	Human	LINC00940	rs1448722004	chr12:1929848..1929848	dbSNP153			CCTCTTCCTCCTCCTCCTCCTCCCCCTTCCTTCTCCTCCTCTTCTTCCTCCTCCTTCCCCTTCCT	CCTCTTCCTCCTCCTCCTCCTCCCCCTTCCTTTTCCTCCTCTTCTTCCTCCTCCTTCCCCTTCCT
m5C	chr12:1929856(-)	BS-Seq (High)	Human	LINC00940	rs1206621714	chr12:1929854..1929857	dbSNP153			CCTCCTCCCCTCTTCCTCCTCCTCCTCCTCCCCCTTCCTTCTCCTCCTCTTCTTCCTCCTCCTTC	CCTCCTCCCCTCTTCCTCCTCCTCCTCCTCC___TTCCTTCTCCTCCTCTTCTTCCTCCTCCTTC
m5C	chr12:1929857(-)	BS-Seq (High)	Human	LINC00940	rs1206621714	chr12:1929854..1929857	dbSNP153			TCCTCCTCCCCTCTTCCTCCTCCTCCTCCTCCCCCTTCCTTCTCCTCCTCTTCTTCCTCCTCCTT	TCCTCCTCCCCTCTTCCTCCTCCTCCTCCTCC___TTCCTTCTCCTCCTCTTCTTCCTCCTCCTT
m5C	chr12:1929857(-)	BS-Seq (High)	Human	LINC00940	rs1206621714	chr12:1929854..1929857	dbSNP153			TCCTCCTCCCCTCTTCCTCCTCCTCCTCCTCCCCCTTCCTTCTCCTCCTCTTCTTCCTCCTCCTT	TCCTCCTCCCCTCTTCCTCCTCCTCCTCCTCC_CCTTCCTTCTCCTCCTCTTCTTCCTCCTCCTT
m5C	chr12:1929856(-)	BS-Seq (High)	Human	LINC00940	rs66541354	chr12:1929856..1929856	dbSNP153			CCTCCTCCCCTCTTCCTCCTCCTCCTCCTCCCCCTTCCTTCTCCTCCTCTTCTTCCTCCTCCTTC	CCTCCTCCCCTCTTCCTCCTCCTCCTCCTCCCGCTTCCTTCTCCTCCTCTTCTTCCTCCTCCTTC
m5C	chr12:1929857(-)	BS-Seq (High)	Human	LINC00940	rs1255019811	chr12:1929857..1929857	dbSNP153			TCCTCCTCCCCTCTTCCTCCTCCTCCTCCTCCCCCTTCCTTCTCCTCCTCTTCTTCCTCCTCCTT	TCCTCCTCCCCTCTTCCTCCTCCTCCTCCTCCTCCTTCCTTCTCCTCCTCTTCTTCCTCCTCCTT
m5C	chr12:1929862(-)	BS-Seq (High)	Human	LINC00940	rs570429008	chr12:1929857..1929863	dbSNP153			CCTCTTCCTCCTCCCCTCTTCCTCCTCCTCCTCCTCCCCCTTCCTTCTCCTCCTCTTCTTCCTCC	CCTCTTCCTCCTCCCCTCTTCCTCCTCCTCC______CCCTTCCTTCTCCTCCTCTTCTTCCTCC
m5C	chr12:1929862(-)	BS-Seq (High)	Human	LINC00940	rs570429008	chr12:1929857..1929863	dbSNP153			CCTCTTCCTCCTCCCCTCTTCCTCCTCCTCCTCCTCCCCCTTCCTTCTCCTCCTCTTCTTCCTCC	CCTCTTCCTCCTCCCCTCTTCCTCCTCCTCC___TCCCCCTTCCTTCTCCTCCTCTTCTTCCTCC
m5C	chr12:1929859(-)	BS-Seq (High)	Human	LINC00940	rs1489252513	chr12:1929859..1929859	dbSNP153			CTTCCTCCTCCCCTCTTCCTCCTCCTCCTCCTCCCCCTTCCTTCTCCTCCTCTTCTTCCTCCTCC	CTTCCTCCTCCCCTCTTCCTCCTCCTCCTCCTGCCCCTTCCTTCTCCTCCTCTTCTTCCTCCTCC
m5C	chr12:1929880(-)	BS-Seq (High)	Human	LINC00940	rs1294852189	chr12:1929863..1929880	dbSNP153			CCTCCCCTTCTTCTTCCCCCTCTTCCTCCTCCCCTCTTCCTCCTCCTCCTCCTCCCCCTTCCTTC	CCTCCCCTTCTTCTTCCCCCTCTTCCTCCTCC_________________TCCTCCCCCTTCCTTC
m5C	chr12:1929879(-)	BS-Seq (High)	Human	LINC00940	rs1294852189	chr12:1929863..1929880	dbSNP153			CTCCCCTTCTTCTTCCCCCTCTTCCTCCTCCCCTCTTCCTCCTCCTCCTCCTCCCCCTTCCTTCT	CTCCCCTTCTTCTTCCCCCTCTTCCTCCTCC_________________TCCTCCCCCTTCCTTCT
m5C	chr12:1929922(-)	BS-Seq (High)	Human	LINC00940	rs1565752056	chr12:1929863..1929922	dbSNP153			TCCCCTCTTCCTCCCCCTCTTCCTCCTCCTCCCCCTCTTACTCCTCCCCTTCTTCTTCCCCCTCT	TCCCCTCTTCCTCCCCCTCTTCCTCCTCCTCC_________________________________
m5C	chr12:1929921(-)	BS-Seq (High)	Human	LINC00940	rs1565752056	chr12:1929863..1929922	dbSNP153			CCCCTCTTCCTCCCCCTCTTCCTCCTCCTCCCCCTCTTACTCCTCCCCTTCTTCTTCCCCCTCTT	CCCCTCTTCCTCCCCCTCTTCCTCCTCCTCC__________________________________
m5C	chr12:1929864(-)	BS-Seq (High)	Human	LINC00940	rs1227046707	chr12:1929864..1929864	dbSNP153			CCCCTCTTCCTCCTCCCCTCTTCCTCCTCCTCCTCCTCCCCCTTCCTTCTCCTCCTCTTCTTCCT	CCCCTCTTCCTCCTCCCCTCTTCCTCCTCCTCTTCCTCCCCCTTCCTTCTCCTCCTCTTCTTCCT
m5C	chr12:1929877(-)	BS-Seq (High)	Human	LINC00940	rs1366496700	chr12:1929864..1929878	dbSNP153			CCCCTTCTTCTTCCCCCTCTTCCTCCTCCCCTCTTCCTCCTCCTCCTCCTCCCCCTTCCTTCTCC	CCCCTTCTTCTTCCCCCTCTTCCTCCTCCCC______________CTCCTCCCCCTTCCTTCTCC
m5C	chr12:1929865(-)	BS-Seq (High)	Human	LINC00940	rs1302153652	chr12:1929865..1929865	dbSNP153			CCCCCTCTTCCTCCTCCCCTCTTCCTCCTCCTCCTCCTCCCCCTTCCTTCTCCTCCTCTTCTTCC	CCCCCTCTTCCTCCTCCCCTCTTCCTCCTCCTGCTCCTCCCCCTTCCTTCTCCTCCTCTTCTTCC
m5C	chr12:1929880(-)	BS-Seq (High)	Human	LINC00940	rs199911646	chr12:1929866..1929880	dbSNP153			CCTCCCCTTCTTCTTCCCCCTCTTCCTCCTCCCCTCTTCCTCCTCCTCCTCCTCCCCCTTCCTTC	CCTCCCCTTCTTCTTCCCCCTCTTCCTCCTCC______________TCCTCCTCCCCCTTCCTTC
m5C	chr12:1929879(-)	BS-Seq (High)	Human	LINC00940	rs199911646	chr12:1929866..1929880	dbSNP153			CTCCCCTTCTTCTTCCCCCTCTTCCTCCTCCCCTCTTCCTCCTCCTCCTCCTCCCCCTTCCTTCT	CTCCCCTTCTTCTTCCCCCTCTTCCTCCTCC______________TCCTCCTCCCCCTTCCTTCT
m5C	chr12:1929895(-)	BS-Seq (High)	Human	LINC00940	rs1303635465	chr12:1929872..1929895	dbSNP153			CCTCCCCCTCTTACTCCTCCCCTTCTTCTTCCCCCTCTTCCTCCTCCCCTCTTCCTCCTCCTCCT	CCTCCCCCTCTTACTCCTCCCCTTCTTCTTCC_______________________TCCTCCTCCT
m5C	chr12:1929894(-)	BS-Seq (High)	Human	LINC00940	rs1303635465	chr12:1929872..1929895	dbSNP153			CTCCCCCTCTTACTCCTCCCCTTCTTCTTCCCCCTCTTCCTCCTCCCCTCTTCCTCCTCCTCCTC	CTCCCCCTCTTACTCCTCCCCTTCTTCTTCC_______________________TCCTCCTCCTC
m5C	chr12:1929873(-)	BS-Seq (High)	Human	LINC00940	rs528105887	chr12:1929873..1929873	dbSNP153			TTCTTCTTCCCCCTCTTCCTCCTCCCCTCTTCCTCCTCCTCCTCCTCCCCCTTCCTTCTCCTCCT	TTCTTCTTCCCCCTCTTCCTCCTCCCCTCTTCTTCCTCCTCCTCCTCCCCCTTCCTTCTCCTCCT
m5C	chr12:1929877(-)	BS-Seq (High)	Human	LINC00940	rs1436893090	chr12:1929877..1929877	dbSNP153			CCCCTTCTTCTTCCCCCTCTTCCTCCTCCCCTCTTCCTCCTCCTCCTCCTCCCCCTTCCTTCTCC	CCCCTTCTTCTTCCCCCTCTTCCTCCTCCCCTTTTCCTCCTCCTCCTCCTCCCCCTTCCTTCTCC
m5C	chr12:1929924(-)	BS-Seq (High)	Human	LINC00940	rs1565752073	chr12:1929880..1929925	dbSNP153			CCTCCCCTCTTCCTCCCCCTCTTCCTCCTCCTCCCCCTCTTACTCCTCCCCTTCTTCTTCCCCCT	CCTCCCCTCTTCCTCCCCCTCTTCCTCCTCCT_________________________________
m5C	chr12:1929881(-)	BS-Seq (High)	Human	LINC00940	rs546574964	chr12:1929881..1929881	dbSNP153			TCCTCCCCTTCTTCTTCCCCCTCTTCCTCCTCCCCTCTTCCTCCTCCTCCTCCTCCCCCTTCCTT	TCCTCCCCTTCTTCTTCCCCCTCTTCCTCCTCTCCTCTTCCTCCTCCTCCTCCTCCCCCTTCCTT
m5C	chr12:1929922(-)	BS-Seq (High)	Human	LINC00940	rs1266086355	chr12:1929890..1929923	dbSNP153			TCCCCTCTTCCTCCCCCTCTTCCTCCTCCTCCCCCTCTTACTCCTCCCCTTCTTCTTCCCCCTCT	TCCCCTCTTCCTCCCCCTCTTCCTCCTCCTC_________________________________T
m5C	chr12:1929923(-)	BS-Seq (High)	Human	LINC00940	rs1266086355	chr12:1929890..1929923	dbSNP153			CTCCCCTCTTCCTCCCCCTCTTCCTCCTCCTCCCCCTCTTACTCCTCCCCTTCTTCTTCCCCCTC	CTCCCCTCTTCCTCCCCCTCTTCCTCCTCCTCC________________________________
m5C	chr12:1929894(-)	BS-Seq (High)	Human	LINC00940	rs1188214318	chr12:1929894..1929894	dbSNP153			CTCCCCCTCTTACTCCTCCCCTTCTTCTTCCCCCTCTTCCTCCTCCCCTCTTCCTCCTCCTCCTC	CTCCCCCTCTTACTCCTCCCCTTCTTCTTCCCACTCTTCCTCCTCCCCTCTTCCTCCTCCTCCTC
m5C	chr12:1929895(-)	BS-Seq (High)	Human	LINC00940	rs537336131	chr12:1929895..1929895	dbSNP153			CCTCCCCCTCTTACTCCTCCCCTTCTTCTTCCCCCTCTTCCTCCTCCCCTCTTCCTCCTCCTCCT	CCTCCCCCTCTTACTCCTCCCCTTCTTCTTCCTCCTCTTCCTCCTCCCCTCTTCCTCCTCCTCCT
m5C	chr12:1929897(-)	BS-Seq (High)	Human	LINC00940	rs1339531925	chr12:1929897..1929897	dbSNP153			CTCCTCCCCCTCTTACTCCTCCCCTTCTTCTTCCCCCTCTTCCTCCTCCCCTCTTCCTCCTCCTC	CTCCTCCCCCTCTTACTCCTCCCCTTCTTCTTTCCCCTCTTCCTCCTCCCCTCTTCCTCCTCCTC
m5C	chr12:1929924(-)	BS-Seq (High)	Human	LINC00940	rs1398787399	chr12:1929907..1929925	dbSNP153			CCTCCCCTCTTCCTCCCCCTCTTCCTCCTCCTCCCCCTCTTACTCCTCCCCTTCTTCTTCCCCCT	CCTCCCCTCTTCCTCCCCCTCTTCCTCCTCC__________________CCTTCTTCTTCCCCCT
m5C	chr12:1929907(-)	BS-Seq (High)	Human	LINC00940	rs192643008	chr12:1929907..1929907	dbSNP153			CCTCTTCCTCCTCCTCCCCCTCTTACTCCTCCCCTTCTTCTTCCCCCTCTTCCTCCTCCCCTCTT	CCTCTTCCTCCTCCTCCCCCTCTTACTCCTCCTCTTCTTCTTCCCCCTCTTCCTCCTCCCCTCTT
m5C	chr12:1929907(-)	BS-Seq (High)	Human	LINC00940	rs192643008	chr12:1929907..1929907	dbSNP153			CCTCTTCCTCCTCCTCCCCCTCTTACTCCTCCCCTTCTTCTTCCCCCTCTTCCTCCTCCCCTCTT	CCTCTTCCTCCTCCTCCCCCTCTTACTCCTCCGCTTCTTCTTCCCCCTCTTCCTCCTCCCCTCTT
m5C	chr12:1929914(-)	BS-Seq (High)	Human	LINC00940	rs1456388899	chr12:1929911..1929915	dbSNP153			TCCTCCCCCTCTTCCTCCTCCTCCCCCTCTTACTCCTCCCCTTCTTCTTCCCCCTCTTCCTCCTC	TCCTCCCCCTCTTCCTCCTCCTCCCCCTCTT____CTCCCCTTCTTCTTCCCCCTCTTCCTCCTC
m5C	chr12:1929914(-)	BS-Seq (High)	Human	LINC00940	rs1367823549	chr12:1929912..1929915	dbSNP153			TCCTCCCCCTCTTCCTCCTCCTCCCCCTCTTACTCCTCCCCTTCTTCTTCCCCCTCTTCCTCCTC	TCCTCCCCCTCTTCCTCCTCCTCCCCCTCTT___CCTCCCCTTCTTCTTCCCCCTCTTCCTCCTC
m5C	chr12:1929932(-)	BS-Seq (High)	Human	LINC00940	rs1249125375	chr12:1929915..1929933	dbSNP153			CTCTTCCTCCTCCCCTCTTCCTCCCCCTCTTCCTCCTCCTCCCCCTCTTACTCCTCCCCTTCTTC	CTCTTCCTCCTCCCCTCTTCCTCCCCCTCTT__________________ACTCCTCCCCTTCTTC
m5C	chr12:1929933(-)	BS-Seq (High)	Human	LINC00940	rs1249125375	chr12:1929915..1929933	dbSNP153			ACTCTTCCTCCTCCCCTCTTCCTCCCCCTCTTCCTCCTCCTCCCCCTCTTACTCCTCCCCTTCTT	ACTCTTCCTCCTCCCCTCTTCCTCCCCCTCTT__________________ACTCCTCCCCTTCTT
m5C	chr12:1929918(-)	BS-Seq (High)	Human	LINC00940	rs200444923	chr12:1929916..1929918	dbSNP153			CTCTTCCTCCCCCTCTTCCTCCTCCTCCCCCTCTTACTCCTCCCCTTCTTCTTCCCCCTCTTCCT	CTCTTCCTCCCCCTCTTCCTCCTCCTCCCCCT__TACTCCTCCCCTTCTTCTTCCCCCTCTTCCT
m5C	chr12:1929922(-)	BS-Seq (High)	Human	LINC00940	rs1207559743	chr12:1929919..1929922	dbSNP153			TCCCCTCTTCCTCCCCCTCTTCCTCCTCCTCCCCCTCTTACTCCTCCCCTTCTTCTTCCCCCTCT	TCCCCTCTTCCTCCCCCTCTTCCTCCTCCTCC___TCTTACTCCTCCCCTTCTTCTTCCCCCTCT
m5C	chr12:1929921(-)	BS-Seq (High)	Human	LINC00940	rs1207559743	chr12:1929919..1929922	dbSNP153			CCCCTCTTCCTCCCCCTCTTCCTCCTCCTCCCCCTCTTACTCCTCCCCTTCTTCTTCCCCCTCTT	CCCCTCTTCCTCCCCCTCTTCCTCCTCCTCC___TCTTACTCCTCCCCTTCTTCTTCCCCCTCTT
m5C	chr12:1929922(-)	BS-Seq (High)	Human	LINC00940	rs1207559743	chr12:1929919..1929922	dbSNP153			TCCCCTCTTCCTCCCCCTCTTCCTCCTCCTCCCCCTCTTACTCCTCCCCTTCTTCTTCCCCCTCT	TCCCCTCTTCCTCCCCCTCTTCCTCCTCCTCC__CTCTTACTCCTCCCCTTCTTCTTCCCCCTCT
m5C	chr12:1929921(-)	BS-Seq (High)	Human	LINC00940	rs1207559743	chr12:1929919..1929922	dbSNP153			CCCCTCTTCCTCCCCCTCTTCCTCCTCCTCCCCCTCTTACTCCTCCCCTTCTTCTTCCCCCTCTT	CCCCTCTTCCTCCCCCTCTTCCTCCTCCTCC__CTCTTACTCCTCCCCTTCTTCTTCCCCCTCTT
m5C	chr12:1929922(-)	BS-Seq (High)	Human	LINC00940	rs1207559743	chr12:1929919..1929922	dbSNP153			TCCCCTCTTCCTCCCCCTCTTCCTCCTCCTCCCCCTCTTACTCCTCCCCTTCTTCTTCCCCCTCT	TCCCCTCTTCCTCCCCCTCTTCCTCCTCCTCC_CCTCTTACTCCTCCCCTTCTTCTTCCCCCTCT
m5C	chr12:1929920(-)	BS-Seq (High)	Human	LINC00940	rs1235478319	chr12:1929920..1929920	dbSNP153			CCCTCTTCCTCCCCCTCTTCCTCCTCCTCCCCCTCTTACTCCTCCCCTTCTTCTTCCCCCTCTTC	CCCTCTTCCTCCCCCTCTTCCTCCTCCTCCCCGTCTTACTCCTCCCCTTCTTCTTCCCCCTCTTC
m5C	chr12:1929920(-)	BS-Seq (High)	Human	LINC00940	rs1235478319	chr12:1929920..1929920	dbSNP153			CCCTCTTCCTCCCCCTCTTCCTCCTCCTCCCCCTCTTACTCCTCCCCTTCTTCTTCCCCCTCTTC	CCCTCTTCCTCCCCCTCTTCCTCCTCCTCCCCATCTTACTCCTCCCCTTCTTCTTCCCCCTCTTC
m5C	chr12:1929924(-)	BS-Seq (High)	Human	LINC00940	rs1565752123	chr12:1929921..1929925	dbSNP153			CCTCCCCTCTTCCTCCCCCTCTTCCTCCTCCTCCCCCTCTTACTCCTCCCCTTCTTCTTCCCCCT	CCTCCCCTCTTCCTCCCCCTCTTCCTCCTCC____CCTCTTACTCCTCCCCTTCTTCTTCCCCCT
m5C	chr12:1929921(-)	BS-Seq (High)	Human	LINC00940	rs1287937714	chr12:1929921..1929921	dbSNP153			CCCCTCTTCCTCCCCCTCTTCCTCCTCCTCCCCCTCTTACTCCTCCCCTTCTTCTTCCCCCTCTT	CCCCTCTTCCTCCCCCTCTTCCTCCTCCTCCCTCTCTTACTCCTCCCCTTCTTCTTCCCCCTCTT
m5C	chr12:1929921(-)	BS-Seq (High)	Human	LINC00940	rs1287937714	chr12:1929921..1929921	dbSNP153			CCCCTCTTCCTCCCCCTCTTCCTCCTCCTCCCCCTCTTACTCCTCCCCTTCTTCTTCCCCCTCTT	CCCCTCTTCCTCCCCCTCTTCCTCCTCCTCCCACTCTTACTCCTCCCCTTCTTCTTCCCCCTCTT
m5C	chr12:1929927(-)	BS-Seq (High)	Human	LINC00940	rs1158817434	chr12:1929922..1929928	dbSNP153			CCTCCTCCCCTCTTCCTCCCCCTCTTCCTCCTCCTCCCCCTCTTACTCCTCCCCTTCTTCTTCCC	CCTCCTCCCCTCTTCCTCCCCCTCTTCCTCC______CCCTCTTACTCCTCCCCTTCTTCTTCCC
m5C	chr12:1929927(-)	BS-Seq (High)	Human	LINC00940	rs1158817434	chr12:1929922..1929928	dbSNP153			CCTCCTCCCCTCTTCCTCCCCCTCTTCCTCCTCCTCCCCCTCTTACTCCTCCCCTTCTTCTTCCC	CCTCCTCCCCTCTTCCTCCCCCTCTTCCTCC___TCCCCCTCTTACTCCTCCCCTTCTTCTTCCC
m5C	chr12:1929951(-)	BS-Seq (High)	Human	LINC00940	rs1389877998	chr12:1929925..1929951	dbSNP153			CCTCCCCCTCTTCATCCCACTCTTCCTCCTCCCCTCTTCCTCCCCCTCTTCCTCCTCCTCCCCCT	CCTCCCCCTCTTCATCCCACTCTTCCTCCTCC__________________________TCCCCCT
m5C	chr12:1929950(-)	BS-Seq (High)	Human	LINC00940	rs1389877998	chr12:1929925..1929951	dbSNP153			CTCCCCCTCTTCATCCCACTCTTCCTCCTCCCCTCTTCCTCCCCCTCTTCCTCCTCCTCCCCCTC	CTCCCCCTCTTCATCCCACTCTTCCTCCTCC__________________________TCCCCCTC
m5C	chr12:1929940(-)	BS-Seq (High)	Human	LINC00940	rs1306410191	chr12:1929928..1929940	dbSNP153			TCATCCCACTCTTCCTCCTCCCCTCTTCCTCCCCCTCTTCCTCCTCCTCCCCCTCTTACTCCTCC	TCATCCCACTCTTCCTCCTCCCCTCTTCCTCC____________TCCTCCCCCTCTTACTCCTCC
m5C	chr12:1929939(-)	BS-Seq (High)	Human	LINC00940	rs1306410191	chr12:1929928..1929940	dbSNP153			CATCCCACTCTTCCTCCTCCCCTCTTCCTCCCCCTCTTCCTCCTCCTCCCCCTCTTACTCCTCCC	CATCCCACTCTTCCTCCTCCCCTCTTCCTCC____________TCCTCCCCCTCTTACTCCTCCC
m5C	chr12:1929929(-)	BS-Seq (High)	Human	LINC00940	rs1409558641	chr12:1929929..1929929	dbSNP153			TTCCTCCTCCCCTCTTCCTCCCCCTCTTCCTCCTCCTCCCCCTCTTACTCCTCCCCTTCTTCTTC	TTCCTCCTCCCCTCTTCCTCCCCCTCTTCCTCTTCCTCCCCCTCTTACTCCTCCCCTTCTTCTTC
m5C	chr12:1929932(-)	BS-Seq (High)	Human	LINC00940	rs1157957449	chr12:1929932..1929932	dbSNP153			CTCTTCCTCCTCCCCTCTTCCTCCCCCTCTTCCTCCTCCTCCCCCTCTTACTCCTCCCCTTCTTC	CTCTTCCTCCTCCCCTCTTCCTCCCCCTCTTCGTCCTCCTCCCCCTCTTACTCCTCCCCTTCTTC
m5C	chr12:1930006(-)	BS-Seq (High)	Human	LINC00940	rs1565752134	chr12:1929933..1930007	dbSNP153			TCTCCCTCCCCCTCTTCTTCCTCCTCCTCCCTCTCTTCCTCCTCCTCCCCCTCTTCCTCCCCCTC	TCTCCCTCCCCCTCTTCTTCCTCCTCCTCCC__________________________________
m5C	chr12:1929933(-)	BS-Seq (High)	Human	LINC00940	rs1470270768	chr12:1929933..1929933	dbSNP153			ACTCTTCCTCCTCCCCTCTTCCTCCCCCTCTTCCTCCTCCTCCCCCTCTTACTCCTCCCCTTCTT	ACTCTTCCTCCTCCCCTCTTCCTCCCCCTCTTTCTCCTCCTCCCCCTCTTACTCCTCCCCTTCTT
m5C	chr12:1929933(-)	BS-Seq (High)	Human	LINC00940	rs1470270768	chr12:1929933..1929933	dbSNP153			ACTCTTCCTCCTCCCCTCTTCCTCCCCCTCTTCCTCCTCCTCCCCCTCTTACTCCTCCCCTTCTT	ACTCTTCCTCCTCCCCTCTTCCTCCCCCTCTTACTCCTCCTCCCCCTCTTACTCCTCCCCTTCTT
m5C	chr12:1929938(-)	BS-Seq (High)	Human	LINC00940	rs530413504	chr12:1929938..1929938	dbSNP153			ATCCCACTCTTCCTCCTCCCCTCTTCCTCCCCCTCTTCCTCCTCCTCCCCCTCTTACTCCTCCCC	ATCCCACTCTTCCTCCTCCCCTCTTCCTCCCCTTCTTCCTCCTCCTCCCCCTCTTACTCCTCCCC
m5C	chr12:1929939(-)	BS-Seq (High)	Human	LINC00940	rs1216147467	chr12:1929939..1929939	dbSNP153			CATCCCACTCTTCCTCCTCCCCTCTTCCTCCCCCTCTTCCTCCTCCTCCCCCTCTTACTCCTCCC	CATCCCACTCTTCCTCCTCCCCTCTTCCTCCCTCTCTTCCTCCTCCTCCCCCTCTTACTCCTCCC
m5C	chr12:1929964(-)	BS-Seq (High)	Human	LINC00940	rs1463812108	chr12:1929939..1929965	dbSNP153			TCCTCCCCCTCTTCCTCCCCCTCTTCATCCCACTCTTCCTCCTCCCCTCTTCCTCCCCCTCTTCC	TCCTCCCCCTCTTCCTCCCCCTCTTCATCCC__________________________CCTCTTCC
m5C	chr12:1930006(-)	BS-Seq (High)	Human	LINC00940	rs1565752144	chr12:1929939..1930007	dbSNP153			TCTCCCTCCCCCTCTTCTTCCTCCTCCTCCCTCTCTTCCTCCTCCTCCCCCTCTTCCTCCCCCTC	TCTCCCTCCCCCTCTTCTTCCTCCTCCTCCC__________________________________
m5C	chr12:1929940(-)	BS-Seq (High)	Human	LINC00940	rs1267967573	chr12:1929940..1929940	dbSNP153			TCATCCCACTCTTCCTCCTCCCCTCTTCCTCCCCCTCTTCCTCCTCCTCCCCCTCTTACTCCTCC	TCATCCCACTCTTCCTCCTCCCCTCTTCCTCCTCCTCTTCCTCCTCCTCCCCCTCTTACTCCTCC
m5C	chr12:1929953(-)	BS-Seq (High)	Human	LINC00940	rs1410495138	chr12:1929940..1929954	dbSNP153			TTCCTCCCCCTCTTCATCCCACTCTTCCTCCTCCCCTCTTCCTCCCCCTCTTCCTCCTCCTCCCC	TTCCTCCCCCTCTTCATCCCACTCTTCCTCC______________CCCTCTTCCTCCTCCTCCCC
m5C	chr12:1929951(-)	BS-Seq (High)	Human	LINC00940	rs1309823561	chr12:1929943..1929951	dbSNP153			CCTCCCCCTCTTCATCCCACTCTTCCTCCTCCCCTCTTCCTCCCCCTCTTCCTCCTCCTCCCCCT	CCTCCCCCTCTTCATCCCACTCTTCCTCCTCC________TCCCCCTCTTCCTCCTCCTCCCCCT
m5C	chr12:1929950(-)	BS-Seq (High)	Human	LINC00940	rs1309823561	chr12:1929943..1929951	dbSNP153			CTCCCCCTCTTCATCCCACTCTTCCTCCTCCCCTCTTCCTCCCCCTCTTCCTCCTCCTCCCCCTC	CTCCCCCTCTTCATCCCACTCTTCCTCCTCC________TCCCCCTCTTCCTCCTCCTCCCCCTC
m5C	chr12:1929944(-)	BS-Seq (High)	Human	LINC00940	rs567449152	chr12:1929944..1929944	dbSNP153			CTCTTCATCCCACTCTTCCTCCTCCCCTCTTCCTCCCCCTCTTCCTCCTCCTCCCCCTCTTACTC	CTCTTCATCCCACTCTTCCTCCTCCCCTCTTCTTCCCCCTCTTCCTCCTCCTCCCCCTCTTACTC
m5C	chr12:1929944(-)	BS-Seq (High)	Human	LINC00940	rs567449152	chr12:1929944..1929944	dbSNP153			CTCTTCATCCCACTCTTCCTCCTCCCCTCTTCCTCCCCCTCTTCCTCCTCCTCCCCCTCTTACTC	CTCTTCATCCCACTCTTCCTCCTCCCCTCTTCATCCCCCTCTTCCTCCTCCTCCCCCTCTTACTC
m5C	chr12:1929977(-)	BS-Seq (High)	Human	LINC00940	rs1348556326	chr12:1929946..1929978	dbSNP153			CCTCTCTTCCTCCTCCTCCCCCTCTTCCTCCCCCTCTTCATCCCACTCTTCCTCCTCCCCTCTTC	CCTCTCTTCCTCCTCCTCCCCCTCTTCCTCC________________________________TC
m5C	chr12:1929978(-)	BS-Seq (High)	Human	LINC00940	rs1348556326	chr12:1929946..1929978	dbSNP153			CCCTCTCTTCCTCCTCCTCCCCCTCTTCCTCCCCCTCTTCATCCCACTCTTCCTCCTCCCCTCTT	CCCTCTCTTCCTCCTCCTCCCCCTCTTCCTCC________________________________T
m5C	chr12:1929948(-)	BS-Seq (High)	Human	LINC00940	rs548547639	chr12:1929948..1929948	dbSNP153			CCCCCTCTTCATCCCACTCTTCCTCCTCCCCTCTTCCTCCCCCTCTTCCTCCTCCTCCCCCTCTT	CCCCCTCTTCATCCCACTCTTCCTCCTCCCCTTTTCCTCCCCCTCTTCCTCCTCCTCCCCCTCTT
m5C	chr12:1929948(-)	BS-Seq (High)	Human	LINC00940	rs548547639	chr12:1929948..1929948	dbSNP153			CCCCCTCTTCATCCCACTCTTCCTCCTCCCCTCTTCCTCCCCCTCTTCCTCCTCCTCCCCCTCTT	CCCCCTCTTCATCCCACTCTTCCTCCTCCCCTATTCCTCCCCCTCTTCCTCCTCCTCCCCCTCTT
m5C	chr12:1929976(-)	BS-Seq (High)	Human	LINC00940	rs1170484749	chr12:1929949..1929976	dbSNP153			CTCTCTTCCTCCTCCTCCCCCTCTTCCTCCCCCTCTTCATCCCACTCTTCCTCCTCCCCTCTTCC	CTCTCTTCCTCCTCCTCCCCCTCTTCCTCCCC___________________________TCTTCC
m5C	chr12:1929988(-)	BS-Seq (High)	Human	LINC00940	rs1477394640	chr12:1929949..1929988	dbSNP153			TCCTCCTCCTCCCTCTCTTCCTCCTCCTCCCCCTCTTCCTCCCCCTCTTCATCCCACTCTTCCTC	TCCTCCTCCTCCCTCTCTTCCTCCTCCTCCCCC________________________________
m5C	chr12:1929950(-)	BS-Seq (High)	Human	LINC00940	rs1395219412	chr12:1929950..1929950	dbSNP153			CTCCCCCTCTTCATCCCACTCTTCCTCCTCCCCTCTTCCTCCCCCTCTTCCTCCTCCTCCCCCTC	CTCCCCCTCTTCATCCCACTCTTCCTCCTCCCTTCTTCCTCCCCCTCTTCCTCCTCCTCCCCCTC
m5C	chr12:1930006(-)	BS-Seq (High)	Human	LINC00940	rs1565752164	chr12:1929950..1930007	dbSNP153			TCTCCCTCCCCCTCTTCTTCCTCCTCCTCCCTCTCTTCCTCCTCCTCCCCCTCTTCCTCCCCCTC	TCTCCCTCCCCCTCTTCTTCCTCCTCCTCCC__________________________________
m5C	chr12:1929964(-)	BS-Seq (High)	Human	LINC00940	rs1448131754	chr12:1929951..1929965	dbSNP153			TCCTCCCCCTCTTCCTCCCCCTCTTCATCCCACTCTTCCTCCTCCCCTCTTCCTCCCCCTCTTCC	TCCTCCCCCTCTTCCTCCCCCTCTTCATCCC______________CCTCTTCCTCCCCCTCTTCC
m5C	chr12:1929953(-)	BS-Seq (High)	Human	LINC00940	rs1227625438	chr12:1929952..1929954	dbSNP153			TTCCTCCCCCTCTTCATCCCACTCTTCCTCCTCCCCTCTTCCTCCCCCTCTTCCTCCTCCTCCCC	TTCCTCCCCCTCTTCATCCCACTCTTCCTCC__CCCTCTTCCTCCCCCTCTTCCTCCTCCTCCCC
m5C	chr12:1929952(-)	BS-Seq (High)	Human	LINC00940	rs1247965628	chr12:1929952..1929952	dbSNP153			TCCTCCCCCTCTTCATCCCACTCTTCCTCCTCCCCTCTTCCTCCCCCTCTTCCTCCTCCTCCCCC	TCCTCCCCCTCTTCATCCCACTCTTCCTCCTCTCCTCTTCCTCCCCCTCTTCCTCCTCCTCCCCC
m5C	chr12:1929995(-)	BS-Seq (High)	Human	LINC00940	rs1276743900	chr12:1929952..1929996	dbSNP153			CTCTTCTTCCTCCTCCTCCCTCTCTTCCTCCTCCTCCCCCTCTTCCTCCCCCTCTTCATCCCACT	CTCTTCTTCCTCCTCCTCCCTCTCTTCCTCCT_________________________________
m5C	chr12:1929964(-)	BS-Seq (High)	Human	LINC00940	rs1565752173	chr12:1929953..1929965	dbSNP153			TCCTCCCCCTCTTCCTCCCCCTCTTCATCCCACTCTTCCTCCTCCCCTCTTCCTCCCCCTCTTCC	TCCTCCCCCTCTTCCTCCCCCTCTTCATCCC____________CCCCTCTTCCTCCCCCTCTTCC
m5C	chr12:1929977(-)	BS-Seq (High)	Human	LINC00940	rs1282484578	chr12:1929954..1929978	dbSNP153			CCTCTCTTCCTCCTCCTCCCCCTCTTCCTCCCCCTCTTCATCCCACTCTTCCTCCTCCCCTCTTC	CCTCTCTTCCTCCTCCTCCCCCTCTTCCTCC________________________TCCCCTCTTC
m5C	chr12:1929978(-)	BS-Seq (High)	Human	LINC00940	rs1282484578	chr12:1929954..1929978	dbSNP153			CCCTCTCTTCCTCCTCCTCCCCCTCTTCCTCCCCCTCTTCATCCCACTCTTCCTCCTCCCCTCTT	CCCTCTCTTCCTCCTCCTCCCCCTCTTCCTCC________________________TCCCCTCTT
m5C	chr12:1929966(-)	BS-Seq (High)	Human	LINC00940	rs1313180573	chr12:1929954..1929966	dbSNP153			CCTCCTCCCCCTCTTCCTCCCCCTCTTCATCCCACTCTTCCTCCTCCCCTCTTCCTCCCCCTCTT	CCTCCTCCCCCTCTTCCTCCCCCTCTTCATCC____________TCCCCTCTTCCTCCCCCTCTT
m5C	chr12:1929958(-)	BS-Seq (High)	Human	LINC00940	rs534792399	chr12:1929958..1929958	dbSNP153			CCCTCTTCCTCCCCCTCTTCATCCCACTCTTCCTCCTCCCCTCTTCCTCCCCCTCTTCCTCCTCC	CCCTCTTCCTCCCCCTCTTCATCCCACTCTTCTTCCTCCCCTCTTCCTCCCCCTCTTCCTCCTCC
m5C	chr12:1929958(-)	BS-Seq (High)	Human	LINC00940	rs534792399	chr12:1929958..1929958	dbSNP153			CCCTCTTCCTCCCCCTCTTCATCCCACTCTTCCTCCTCCCCTCTTCCTCCCCCTCTTCCTCCTCC	CCCTCTTCCTCCCCCTCTTCATCCCACTCTTCATCCTCCCCTCTTCCTCCCCCTCTTCCTCCTCC
m5C	chr12:1929959(-)	BS-Seq (High)	Human	LINC00940	rs1264465687	chr12:1929959..1929959	dbSNP153			CCCCTCTTCCTCCCCCTCTTCATCCCACTCTTCCTCCTCCCCTCTTCCTCCCCCTCTTCCTCCTC	CCCCTCTTCCTCCCCCTCTTCATCCCACTCTTACTCCTCCCCTCTTCCTCCCCCTCTTCCTCCTC
m5C	chr12:1929977(-)	BS-Seq (High)	Human	LINC00940	rs1375682328	chr12:1929965..1929977	dbSNP153			CCTCTCTTCCTCCTCCTCCCCCTCTTCCTCCCCCTCTTCATCCCACTCTTCCTCCTCCCCTCTTC	CCTCTCTTCCTCCTCCTCCCCCTCTTCCTCCC____________ACTCTTCCTCCTCCCCTCTTC
m5C	chr12:1929976(-)	BS-Seq (High)	Human	LINC00940	rs1375682328	chr12:1929965..1929977	dbSNP153			CTCTCTTCCTCCTCCTCCCCCTCTTCCTCCCCCTCTTCATCCCACTCTTCCTCCTCCCCTCTTCC	CTCTCTTCCTCCTCCTCCCCCTCTTCCTCCC____________ACTCTTCCTCCTCCCCTCTTCC
m5C	chr12:1929966(-)	BS-Seq (High)	Human	LINC00940	rs1174909238	chr12:1929966..1929966	dbSNP153			CCTCCTCCCCCTCTTCCTCCCCCTCTTCATCCCACTCTTCCTCCTCCCCTCTTCCTCCCCCTCTT	CCTCCTCCCCCTCTTCCTCCCCCTCTTCATCCTACTCTTCCTCCTCCCCTCTTCCTCCCCCTCTT
m5C	chr12:1929967(-)	BS-Seq (High)	Human	LINC00940	rs1419387846	chr12:1929967..1929967	dbSNP153			TCCTCCTCCCCCTCTTCCTCCCCCTCTTCATCCCACTCTTCCTCCTCCCCTCTTCCTCCCCCTCT	TCCTCCTCCCCCTCTTCCTCCCCCTCTTCATCTCACTCTTCCTCCTCCCCTCTTCCTCCCCCTCT
m5C	chr12:1929982(-)	BS-Seq (High)	Human	LINC00940	rs1187293485	chr12:1929970..1929982	dbSNP153			TCCTCCCTCTCTTCCTCCTCCTCCCCCTCTTCCTCCCCCTCTTCATCCCACTCTTCCTCCTCCCC	TCCTCCCTCTCTTCCTCCTCCTCCCCCTCTTC____________ATCCCACTCTTCCTCCTCCCC
m5C	chr12:1929990(-)	BS-Seq (High)	Human	LINC00940	rs1282771080	chr12:1929973..1929991	dbSNP153			CTTCCTCCTCCTCCCTCTCTTCCTCCTCCTCCCCCTCTTCCTCCCCCTCTTCATCCCACTCTTCC	CTTCCTCCTCCTCCCTCTCTTCCTCCTCCTC__________________TTCATCCCACTCTTCC
m5C	chr12:1929991(-)	BS-Seq (High)	Human	LINC00940	rs1282771080	chr12:1929973..1929991	dbSNP153			TCTTCCTCCTCCTCCCTCTCTTCCTCCTCCTCCCCCTCTTCCTCCCCCTCTTCATCCCACTCTTC	TCTTCCTCCTCCTCCCTCTCTTCCTCCTCCTC__________________TTCATCCCACTCTTC
m5C	chr12:1929976(-)	BS-Seq (High)	Human	LINC00940	rs1341590303	chr12:1929975..1929976	dbSNP153			CTCTCTTCCTCCTCCTCCCCCTCTTCCTCCCCCTCTTCATCCCACTCTTCCTCCTCCCCTCTTCC	CTCTCTTCCTCCTCCTCCCCCTCTTCCTCCCC_TCTTCATCCCACTCTTCCTCCTCCCCTCTTCC
m5C	chr12:1929976(-)	BS-Seq (High)	Human	LINC00940	rs1272172713	chr12:1929976..1929976	dbSNP153			CTCTCTTCCTCCTCCTCCCCCTCTTCCTCCCCCTCTTCATCCCACTCTTCCTCCTCCCCTCTTCC	CTCTCTTCCTCCTCCTCCCCCTCTTCCTCCCCTTCTTCATCCCACTCTTCCTCCTCCCCTCTTCC
m5C	chr12:1929977(-)	BS-Seq (High)	Human	LINC00940	rs1215145072	chr12:1929977..1929977	dbSNP153			CCTCTCTTCCTCCTCCTCCCCCTCTTCCTCCCCCTCTTCATCCCACTCTTCCTCCTCCCCTCTTC	CCTCTCTTCCTCCTCCTCCCCCTCTTCCTCCCACTCTTCATCCCACTCTTCCTCCTCCCCTCTTC
m5C	chr12:1929978(-)	BS-Seq (High)	Human	LINC00940	rs1341203929	chr12:1929978..1929978	dbSNP153			CCCTCTCTTCCTCCTCCTCCCCCTCTTCCTCCCCCTCTTCATCCCACTCTTCCTCCTCCCCTCTT	CCCTCTCTTCCTCCTCCTCCCCCTCTTCCTCCTCCTCTTCATCCCACTCTTCCTCCTCCCCTCTT
m5C	chr12:1929995(-)	BS-Seq (High)	Human	LINC00940	rs1413953767	chr12:1929978..1929996	dbSNP153			CTCTTCTTCCTCCTCCTCCCTCTCTTCCTCCTCCTCCCCCTCTTCCTCCCCCTCTTCATCCCACT	CTCTTCTTCCTCCTCCTCCCTCTCTTCCTCC__________________CCCTCTTCATCCCACT
m5C	chr12:1929982(-)	BS-Seq (High)	Human	LINC00940	rs1206667256	chr12:1929982..1929982	dbSNP153			TCCTCCCTCTCTTCCTCCTCCTCCCCCTCTTCCTCCCCCTCTTCATCCCACTCTTCCTCCTCCCC	TCCTCCCTCTCTTCCTCCTCCTCCCCCTCTTCTTCCCCCTCTTCATCCCACTCTTCCTCCTCCCC
m5C	chr12:1929982(-)	BS-Seq (High)	Human	LINC00940	rs1206667256	chr12:1929982..1929982	dbSNP153			TCCTCCCTCTCTTCCTCCTCCTCCCCCTCTTCCTCCCCCTCTTCATCCCACTCTTCCTCCTCCCC	TCCTCCCTCTCTTCCTCCTCCTCCCCCTCTTCATCCCCCTCTTCATCCCACTCTTCCTCCTCCCC
m5C	chr12:1929988(-)	BS-Seq (High)	Human	LINC00940	rs1254679042	chr12:1929987..1929989	dbSNP153			TCCTCCTCCTCCCTCTCTTCCTCCTCCTCCCCCTCTTCCTCCCCCTCTTCATCCCACTCTTCCTC	TCCTCCTCCTCCCTCTCTTCCTCCTCCTCCC__TCTTCCTCCCCCTCTTCATCCCACTCTTCCTC
m5C	chr12:1929989(-)	BS-Seq (High)	Human	LINC00940	rs1254679042	chr12:1929987..1929989	dbSNP153			TTCCTCCTCCTCCCTCTCTTCCTCCTCCTCCCCCTCTTCCTCCCCCTCTTCATCCCACTCTTCCT	TTCCTCCTCCTCCCTCTCTTCCTCCTCCTCCC__TCTTCCTCCCCCTCTTCATCCCACTCTTCCT
m5C	chr12:1929989(-)	BS-Seq (High)	Human	LINC00940	rs1254679042	chr12:1929987..1929989	dbSNP153			TTCCTCCTCCTCCCTCTCTTCCTCCTCCTCCCCCTCTTCCTCCCCCTCTTCATCCCACTCTTCCT	TTCCTCCTCCTCCCTCTCTTCCTCCTCCTCCC_CTCTTCCTCCCCCTCTTCATCCCACTCTTCCT
m5C	chr12:1929988(-)	BS-Seq (High)	Human	LINC00940	rs1259842416	chr12:1929988..1929988	dbSNP153			TCCTCCTCCTCCCTCTCTTCCTCCTCCTCCCCCTCTTCCTCCCCCTCTTCATCCCACTCTTCCTC	TCCTCCTCCTCCCTCTCTTCCTCCTCCTCCCCTTCTTCCTCCCCCTCTTCATCCCACTCTTCCTC
m5C	chr12:1930006(-)	BS-Seq (High)	Human	LINC00940	rs200831723	chr12:1929989..1930007	dbSNP153			TCTCCCTCCCCCTCTTCTTCCTCCTCCTCCCTCTCTTCCTCCTCCTCCCCCTCTTCCTCCCCCTC	TCTCCCTCCCCCTCTTCTTCCTCCTCCTCCC__________________CCTCTTCCTCCCCCTC
m5C	chr12:1929992(-)	BS-Seq (High)	Human	LINC00940	rs201656629	chr12:1929989..1929993	dbSNP153			TTCTTCCTCCTCCTCCCTCTCTTCCTCCTCCTCCCCCTCTTCCTCCCCCTCTTCATCCCACTCTT
m5C	chr12:1929989(-)	BS-Seq (High)	Human	LINC00940	rs1180359805	chr12:1929989..1929989	dbSNP153			TTCTTCCTCCTCCTCCCTCTCTTCCTCCTCC____CCTCTTCCTCCCCCTCTTCATCCCACTCTT
m5C	chr12:1929990(-)	BS-Seq (High)	Human	LINC00940	rs558642914	chr12:1929990..1929990	dbSNP153			TTCCTCCTCCTCCCTCTCTTCCTCCTCCTCCCCCTCTTCCTCCCCCTCTTCATCCCACTCTTCCT	TTCCTCCTCCTCCCTCTCTTCCTCCTCCTCCCACTCTTCCTCCCCCTCTTCATCCCACTCTTCCT
m5C	chr12:1930010(-)	BS-Seq (High)	Human	LINC00940	rs1287671475	chr12:1929990..1930011	dbSNP153			CTTCCTCCTCCTCCCTCTCTTCCTCCTCCTCCCCCTCTTCCTCCCCCTCTTCATCCCACTCTTCC	CTTCCTCCTCCTCCCTCTCTTCCTCCTCCTCCTCCTCTTCCTCCCCCTCTTCATCCCACTCTTCC
m5C	chr12:1929995(-)	BS-Seq (High)	Human	LINC00940	rs1439433134	chr12:1929990..1929996	dbSNP153			GCCCTCTCCCTCCCCCTCTTCTTCCTCCTCCTCCCTCTCTTCCTCCTCCTCCCCCTCTTCCTCCC	GCCCTCTCCCTCCCCCTCTTCTTCCTCCTCC_____________________CCCTCTTCCTCCC
m5C	chr12:1929995(-)	BS-Seq (High)	Human	LINC00940	rs1294729547	chr12:1929995..1929995	dbSNP153			CTCTTCTTCCTCCTCCTCCCTCTCTTCCTCCTCCTCCCCCTCTTCCTCCCCCTCTTCATCCCACT	CTCTTCTTCCTCCTCCTCCCTCTCTTCCTCC______CCCTCTTCCTCCCCCTCTTCATCCCACT
m5C	chr12:1929998(-)	BS-Seq (High)	Human	LINC00940	rs1372161382	chr12:1929998..1929998	dbSNP153			CTCTTCTTCCTCCTCCTCCCTCTCTTCCTCCTCCTCCCCCTCTTCCTCCCCCTCTTCATCCCACT	CTCTTCTTCCTCCTCCTCCCTCTCTTCCTCCTTCTCCCCCTCTTCCTCCCCCTCTTCATCCCACT
m5C	chr12:1930004(-)	BS-Seq (High)	Human	LINC00940	rs1298191455	chr12:1929999..1930004	dbSNP153			CCCCTCTTCTTCCTCCTCCTCCCTCTCTTCCTCCTCCTCCCCCTCTTCCTCCCCCTCTTCATCCC	CCCCTCTTCTTCCTCCTCCTCCCTCTCTTCCTACTCCTCCCCCTCTTCCTCCCCCTCTTCATCCC
m5C	chr12:1930000(-)	BS-Seq (High)	Human	LINC00940	rs1443764857	chr12:1930000..1930000	dbSNP153			TCCCTCCCCCTCTTCTTCCTCCTCCTCCCTCTCTTCCTCCTCCTCCCCCTCTTCCTCCCCCTCTT	TCCCTCCCCCTCTTCTTCCTCCTCCTCCCTCT_____TCCTCCTCCCCCTCTTCCTCCCCCTCTT
m5C	chr12:1930006(-)	BS-Seq (High)	Human	LINC00940	rs1348603817	chr12:1930001..1930007	dbSNP153			TCCCCCTCTTCTTCCTCCTCCTCCCTCTCTTCCTCCTCCTCCCCCTCTTCCTCCCCCTCTTCATC	TCCCCCTCTTCTTCCTCCTCCTCCCTCTCTTCATCCTCCTCCCCCTCTTCCTCCCCCTCTTCATC
m5C	chr12:1930004(-)	BS-Seq (High)	Human	LINC00940	rs1462277792	chr12:1930002..1930004	dbSNP153			TCTCCCTCCCCCTCTTCTTCCTCCTCCTCCCTCTCTTCCTCCTCCTCCCCCTCTTCCTCCCCCTC	TCTCCCTCCCCCTCTTCTTCCTCCTCCTCCC______CCTCCTCCTCCCCCTCTTCCTCCCCCTC
m5C	chr12:1930006(-)	BS-Seq (High)	Human	LINC00940	rs1409005634	chr12:1930004..1930007	dbSNP153			TCCCTCCCCCTCTTCTTCCTCCTCCTCCCTCTCTTCCTCCTCCTCCCCCTCTTCCTCCCCCTCTT	TCCCTCCCCCTCTTCTTCCTCCTCCTCCCTCT__TCCTCCTCCTCCCCCTCTTCCTCCCCCTCTT
m5C	chr12:1930006(-)	BS-Seq (High)	Human	LINC00940	rs1462886677	chr12:1930006..1930006	dbSNP153			TCTCCCTCCCCCTCTTCTTCCTCCTCCTCCCTCTCTTCCTCCTCCTCCCCCTCTTCCTCCCCCTC	TCTCCCTCCCCCTCTTCTTCCTCCTCCTCCC___CTTCCTCCTCCTCCCCCTCTTCCTCCCCCTC
m5C	chr12:1930006(-)	BS-Seq (High)	Human	LINC00940	rs1462886677	chr12:1930006..1930006	dbSNP153			TCTCCCTCCCCCTCTTCTTCCTCCTCCTCCCTCTCTTCCTCCTCCTCCCCCTCTTCCTCCCCCTC	TCTCCCTCCCCCTCTTCTTCCTCCTCCTCCCTTTCTTCCTCCTCCTCCCCCTCTTCCTCCCCCTC
m5C	chr12:1930008(-)	BS-Seq (High)	Human	LINC00940	rs1261263925	chr12:1930008..1930008	dbSNP153			TCTCCCTCCCCCTCTTCTTCCTCCTCCTCCCTCTCTTCCTCCTCCTCCCCCTCTTCCTCCCCCTC	TCTCCCTCCCCCTCTTCTTCCTCCTCCTCCCTGTCTTCCTCCTCCTCCCCCTCTTCCTCCCCCTC
m5C	chr12:1930012(-)	BS-Seq (High)	Human	LINC00940	rs1307296132	chr12:1930012..1930012	dbSNP153			CCTCTCCCTCCCCCTCTTCTTCCTCCTCCTCCCTCTCTTCCTCCTCCTCCCCCTCTTCCTCCCCC	CCTCTCCCTCCCCCTCTTCTTCCTCCTCCTCCTTCTCTTCCTCCTCCTCCCCCTCTTCCTCCCCC
m5C	chr12:1930013(-)	BS-Seq (High)	Human	LINC00940	rs1224931964	chr12:1930013..1930013	dbSNP153			TCGCCCTCTCCCTCCCCCTCTTCTTCCTCCTCCTCCCTCTCTTCCTCCTCCTCCCCCTCTTCCTC	TCGCCCTCTCCCTCCCCCTCTTCTTCCTCCTCTTCCCTCTCTTCCTCCTCCTCCCCCTCTTCCTC
m5C	chr12:2798709(-)	BS-Seq (High)	Human	ITFG2-AS1,ITFG2-AS1:2,AC005841.1	rs756286274	chr12:2798709..2798709	dbSNP153			CTCGCCCTCTCCCTCCCCCTCTTCTTCCTCCTCCTCCCTCTCTTCCTCCTCCTCCCCCTCTTCCT	CTCGCCCTCTCCCTCCCCCTCTTCTTCCTCCTTCTCCCTCTCTTCCTCCTCCTCCCCCTCTTCCT
m5C	chr12:3211632(-)	BS-Seq (High)	Human	lnc-FOXM1-4	rs1491000624	chr12:3211632..3211632	dbSNP153	RBP 1		AAAAGCACTCTGAGTCAAGATGAGTGGGAAACCATCTCAATAAACACATTTTGGATAAAAAAAAA	AAAAGCACTCTGAGTCAAGATGAGTGGGAAACTATCTCAATAAACACATTTTGGATAAAAAAAAA
m5C	chr12:8092940(+)	BS-Seq (High)	Human	NECAP1,AC006511.6	rs879232713	chr12:8092940..8092940	dbSNP153	RBP 2 Splice 20 miRNA 3 circRNA 5		AGGACTGCAAGGGGTGGGGGTCTGAGCTTACTCCCACCCCCGCCAGGAGGCAAAGTCACTATTCC	AGGACTGCAAGGGGTGGGGGTCTGAGCTTACTGCCACCCCCGCCAGGAGGCAAAGTCACTATTCC
m5C	chr12:8092941(+)	BS-Seq (High)	Human	NECAP1,AC006511.6	rs775614356	chr12:8092941..8092941	dbSNP153	RBP 2 Splice 20 miRNA 3 circRNA 5		GGACTGCAAGGGGTGGGGGTCTGAGCTTACTCACACCCCCGCCAGGAGGCAAAGTCACTATTCCC	GGACTGCAAGGGGTGGGGGTCTGAGCTTACTCCCACCCCCGCCAGGAGGCAAAGTCACTATTCCC
m5C	chr12:8092941(+)	BS-Seq (High)	Human	NECAP1,AC006511.6	rs775614356	chr12:8092941..8092941	dbSNP153	RBP 2 Splice 20 miRNA 3 circRNA 5		GGACTGCAAGGGGTGGGGGTCTGAGCTTACTCCCACCCCCGCCAGGAGGCAAAGTCACTATTCCC	GGACTGCAAGGGGTGGGGGTCTGAGCTTACTCTCACCCCCGCCAGGAGGCAAAGTCACTATTCCC
m5C	chr12:120117199(+)	BS-Seq (High)	Human	AC004812.2	rs1001000140	chr12:120117199..120117199	dbSNP153	RBP 2		TCGCACGAGCTCCGGGTTTCCAGAGGCAGGGGCCGGGGCCGTAGAAGGCAGAGTCGCGCGGGGAA	TCGCACGAGCTCCGGGTTTCCAGAGGCAGGGGGCGGGGCCGTAGAAGGCAGAGTCGCGCGGGGAA
m5C	chr12:120117199(+)	BS-Seq (High)	Human	AC004812.2	rs1001000140	chr12:120117199..120117199	dbSNP153	RBP 2		TCGCACGAGCTCCGGGTTTCCAGAGGCAGGGGCCGGGGCCGTAGAAGGCAGAGTCGCGCGGGGAA	TCGCACGAGCTCCGGGTTTCCAGAGGCAGGGGTCGGGGCCGTAGAAGGCAGAGTCGCGCGGGGAA
m5C	chr12:122981426(+)	BS-Seq (High)	Human	ARL6IP4,AC026362.1	rs934587071	chr12:122981426..122981426	dbSNP153	RBP 1 miRNA 1 circRNA 5		AGCCGGGCCTGAGATGTGAGGGCCAGGCGCCGCAGGAGCCAGGAAGGGGCTCCTCTGGGAAGCTC	AGCCGGGCCTGAGATGTGAGGGCCAGGCGCCGGAGGAGCCAGGAAGGGGCTCCTCTGGGAAGCTC
m5C	chr12:122981625(+)	BS-Seq (High)	Human	ARL6IP4,AC026362.1	rs543920304	chr12:122981625..122981625	dbSNP153	RBP 8 Splice 13 miRNA 13 circRNA 6		AGAGAGAAGCAAGCAGAAGGCCCGGAGGAGAACAAGATCCAGCTCCTCCTCCTCTTCTTCCAGTT	AGAGAGAAGCAAGCAGAAGGCCCGGAGGAGAAGAAGATCCAGCTCCTCCTCCTCTTCTTCCAGTT
m5C	chr12:124567592(-)	BS-Seq (High)	Human	lnc-NCOR2-5	rs1218723383	chr12:124567592..124567592	dbSNP153			GCCGCCGCCGCCGCCACCGCCGCCGCGGCCGCCGGGGAGCGCGGAGCCGCGGGCAGGCCGGGCCG	GCCGCCGCCGCCGCCACCGCCGCCGCGGCCGCGGGGGAGCGCGGAGCCGCGGGCAGGCCGGGCCG
m5C	chr12:127166071(-)	BS-Seq (High)	Human	lnc-SLC15A4-24	rs201786089	chr12:127166071..127166071	dbSNP153	RBP 25		AGTGCCCTTTGTCCTGGGAAACGGGGCGCGGCCGGAAAGGCGGCCGCCCTCTCGCCCGTCACGCA	AGTGCCCTTTGTCCTGGGAAACGGGGCGCGGCTGGAAAGGCGGCCGCCCTCTCGCCCGTCACGCA
m5C	chr12:127166072(-)	BS-Seq (High)	Human	lnc-SLC15A4-24	rs967027259	chr12:127166072..127166072	dbSNP153	RBP 25		GAGTGCCCTTTGTCCTGGGAAACGGGGCGCGGCCGGAAAGGCGGCCGCCCTCTCGCCCGTCACGC	GAGTGCCCTTTGTCCTGGGAAACGGGGCGCGGTCGGAAAGGCGGCCGCCCTCTCGCCCGTCACGC
m5C	chr12:127166072(-)	BS-Seq (High)	Human	lnc-SLC15A4-24	rs967027259	chr12:127166072..127166072	dbSNP153	RBP 25		GAGTGCCCTTTGTCCTGGGAAACGGGGCGCGGCCGGAAAGGCGGCCGCCCTCTCGCCCGTCACGC	GAGTGCCCTTTGTCCTGGGAAACGGGGCGCGGACGGAAAGGCGGCCGCCCTCTCGCCCGTCACGC
m5C	chr12:127166091(-)	miCLIP (High)	Human	lnc-SLC15A4-24	rs1406936191	chr12:127166091..127166091	dbSNP153	RBP 25 miRNA 2		GGGACCAGGGTCCGGTGCGGAGTGCCCTTTGTCCTGGGAAACGGGGCGCGGCCGGAAAGGCGGCC	GGGACCAGGGTCCGGTGCGGAGTGCCCTTTGTACTGGGAAACGGGGCGCGGCCGGAAAGGCGGCC
m5C	chr12:127166130(-)	BS-Seq (High)	Human	lnc-SLC15A4-24	rs79001791	chr12:127166130..127166130	dbSNP153	RBP 24		ATAGCCGGTCCCCGCCGGCGGGCCGCCCCGCCCCGCGCTGGGACCAGGGTCCGGTGCGGAGTGCC	ATAGCCGGTCCCCGCCGGCGGGCCGCCCCGCCTCGCGCTGGGACCAGGGTCCGGTGCGGAGTGCC
m5C	chr12:127166130(-)	BS-Seq (High)	Human	lnc-SLC15A4-24	rs79001791	chr12:127166130..127166130	dbSNP153	RBP 24		ATAGCCGGTCCCCGCCGGCGGGCCGCCCCGCCCCGCGCTGGGACCAGGGTCCGGTGCGGAGTGCC	ATAGCCGGTCCCCGCCGGCGGGCCGCCCCGCCGCGCGCTGGGACCAGGGTCCGGTGCGGAGTGCC
m5C	chr12:8092945(+)	BS-Seq (High)	Human	NECAP1,AC006511.6	-	chr12:8092945..8092945	TCGA,ICGC	RBP 1 Splice 20 miRNA 3 circRNA 5		TGCAAGGGGTGGGGGTCTGAGCTTACTCCCACCCCCGCCAGGAGGCAAAGTCACTATTCCCCCAC	TGCAAGGGGTGGGGGTCTGAGCTTACTCCCACTCCCGCCAGGAGGCAAAGTCACTATTCCCCCAC
m5C	chr12:98515955(-)	BS-Seq (High)	Human	TMPO-AS1	-	chr12:98515955..98515955	ICGC	RBP 1		GAGCTGGACGTACACGTCTTTGCGCTGCTCCCCGGCCGGCAGCGTCACATTGTTGGCGACCAACT	GAGCTGGACGTACACGTCTTTGCGCTGCTCCCAGGCCGGCAGCGTCACATTGTTGGCGACCAACT
m5C	chr12:1929982(-)	BS-Seq (High)	Human	LINC00940	rs1206667256	chr12:1929982..1929982	ICGC			TCCTCCCTCTCTTCCTCCTCCTCCCCCTCTTCCTCCCCCTCTTCATCCCACTCTTCCTCCTCCCC	TCCTCCCTCTCTTCCTCCTCCTCCCCCTCTTCATCCCCCTCTTCATCCCACTCTTCCTCCTCCCC
m5C	chr12:52308479(-)	BS-Seq (High)	Human	lnc-KRT81-1	-	chr12:52308479..52308479	TCGA			CCACGTTGCTGTTGCTGGGGACGCTACTGACTCTGGTGGAGACAACAGGGGCAGTAGTGGAGGCG	CCACGTTGCTGTTGCTGGGGACGCTACTGACTATGGTGGAGACAACAGGGGCAGTAGTGGAGGCG
m5C	chr12:98516030(-)	BS-Seq (High)	Human	TMPO-AS1	rs868495691	chr12:98516030..98516030	TCGA,ICGC,COSMIC	RBP 5 Splice 2		GAAGTCCGGGGGCCCCTTGCTGTTGGTGCCGGCGGGGAGCGGCGGCCGGTTGCGAGCCGTGAGGT	GAAGTCCGGGGGCCCCTTGCTGTTGGTGCCGGTGGGGAGCGGCGGCCGGTTGCGAGCCGTGAGGT
m5C	chr12:56169559(-)	BS-Seq (High)	Human	AC073896.4,SMARCC2	rs138460781	chr12:56169559..56169559	TCGA,ICGC	RBP 13 Splice 5 circRNA 7		GGCGAGGGCAACCTCTCCACCGCTGCTGCCGCCGCCCTGGCCGCCGCCGCAGTGAAAGCTAAGGT	GGCGAGGGCAACCTCTCCACCGCTGCTGCCGCTGCCCTGGCCGCCGCCGCAGTGAAAGCTAAGGT
m5C	chr12:8092940(+)	BS-Seq (High)	Human	NECAP1,AC006511.6	-	chr12:8092940..8092940	ICGC,COSMIC	RBP 2 Splice 20 miRNA 3 circRNA 5		AGGACTGCAAGGGGTGGGGGTCTGAGCTTACTCCCACCCCCGCCAGGAGGCAAAGTCACTATTCC	AGGACTGCAAGGGGTGGGGGTCTGAGCTTACTTCCACCCCCGCCAGGAGGCAAAGTCACTATTCC
m5C	chr12:124567592(-)	BS-Seq (High)	Human	lnc-NCOR2-5	rs1218723383	chr12:124567592..124567592	ICGC			GCCGCCGCCGCCGCCACCGCCGCCGCGGCCGCCGGGGAGCGCGGAGCCGCGGGCAGGCCGGGCCG	GCCGCCGCCGCCGCCACCGCCGCCGCGGCCGCGGGGGAGCGCGGAGCCGCGGGCAGGCCGGGCCG
m5C	chr12:53455876(+)	BS-Seq (High)	Human	PCBP2,AC023509.1	-	chr12:53455876..53455876	ICGC	RBP 5 circRNA 17		TTCTTTGTTTTAACTTCTTTTGGATCTTGTTTCCTATCTAGAGTGGTGCACGTATCAACATCTCA	TTCTTTGTTTTAACTTCTTTTGGATCTTGTTTTCTATCTAGAGTGGTGCACGTATCAACATCTCA
m5C	chr12:56169547(-)	BS-Seq (High)	Human	AC073896.4,SMARCC2	-	chr12:56169547..56169547	ICGC	RBP 8 Splice 5 circRNA 7		CTCTCCACCGCTGCTGCCGCCGCCCTGGCCGCCGCCGCAGTGAAAGCTAAGGTGAGGCCAGACCT	CTCTCCACCGCTGCTGCCGCCGCCCTGGCCGCAGCCGCAGTGAAAGCTAAGGTGAGGCCAGACCT
m5C	chr12:53446105(+)	BS-Seq (High)	Human	PRR13,AC023509.1	-	chr12:53446105..53446105	ICGC	RBP 4 Splice 9 miRNA 5 circRNA 10		ACCCTTCCCTCAAGTCTCACCAGTTCTGCTCTCCCATCAAGCTTCAGATGCCATGTTGTACTGGG	ACCCTTCCCTCAAGTCTCACCAGTTCTGCTCTACCATCAAGCTTCAGATGCCATGTTGTACTGGG
m5C	chr12:53173735(+)	BS-Seq (High)	Human	lnc-ZNF740-2	-	chr12:53173735..53173735	TCGA,ICGC			CCACCTAAGGCAGAGACAAGCTTACCTCTCTGCTCAGGAGAGCCGGAGGCAGGGTGCACAGGTAG	CCACCTAAGGCAGAGACAAGCTTACCTCTCTGTTCAGGAGAGCCGGAGGCAGGGTGCACAGGTAG
m5C	chr12:56169551(-)	BS-Seq (High)	Human	AC073896.4,SMARCC2	-	chr12:56169551..56169551	TCGA,ICGC	RBP 10 Splice 5 circRNA 7		CAACCTCTCCACCGCTGCTGCCGCCGCCCTGGCCGCCGCCGCAGTGAAAGCTAAGGTGAGGCCAG	CAACCTCTCCACCGCTGCTGCCGCCGCCCTGGTCGCCGCCGCAGTGAAAGCTAAGGTGAGGCCAG
m5C	chr12:54030530(+)	BS-Seq (High)	Human	AC012531.2,HOXC4,AC012531.3,HOXC6	-	chr12:54030530..54030530	ICGC	RBP 6		CAGGCAAATTGTATTTAAAGAATCCTGGGGGTCATTATGGCATTTTACAAACTGTGACCGTTTCT	CAGGCAAATTGTATTTAAAGAATCCTGGGGGTTATTATGGCATTTTACAAACTGTGACCGTTTCT
m5C	chr12:127166055(-)	BS-Seq (High)	Human	lnc-SLC15A4-24	-	chr12:127166055..127166055	ICGC	RBP 25		GGAAACGGGGCGCGGCCGGAAAGGCGGCCGCCCTCTCGCCCGTCACGCAACGCACGTTCGTGGGG	GGAAACGGGGCGCGGCCGGAAAGGCGGCCGCCTTCTCGCCCGTCACGCAACGCACGTTCGTGGGG
m5C	chr12:56169550(-)	BS-Seq (High)	Human	AC073896.4,SMARCC2	rs150104273	chr12:56169550..56169550	ICGC	RBP 10 Splice 5 circRNA 7		AACCTCTCCACCGCTGCTGCCGCCGCCCTGGCCGCCGCCGCAGTGAAAGCTAAGGTGAGGCCAGA	AACCTCTCCACCGCTGCTGCCGCCGCCCTGGCTGCCGCCGCAGTGAAAGCTAAGGTGAGGCCAGA
m5C	chr12:52212089(-)	BS-Seq (High)	Human	LINC02874	rs1456174819	chr12:52212089..52212089	ICGC			TCTTCAGATGAGAACACTGAGGCTCGGCGAGGCGACAAGTCTTTCTGAGGGCCAGTGGAGCAGAC	TCTTCAGATGAGAACACTGAGGCTCGGCGAGGTGACAAGTCTTTCTGAGGGCCAGTGGAGCAGAC
m5C	chr12:103759228(-)	BS-Seq (High)	Human	AC025265.1	rs2271636	chr12:103759228..103759228	ICGC,COSMIC	RBP 1	GWAS_ID_15415	TCCTGGCTGGCAGTGATGAGCAGCTTGCTTCCCAGCCTCGTTTGCAGGGTGGTGCCATTGACAAG	TCCTGGCTGGCAGTGATGAGCAGCTTGCTTCCAAGCCTCGTTTGCAGGGTGGTGCCATTGACAAG
m5C	chr12:53461009(+)	BS-Seq (High)	Human	PCBP2,AC023509.1	-	chr12:53461009..53461009	TCGA	RBP 7 miRNA 4 circRNA 21		TGTTTTTCTCTGATTTTGAATTTCTTTTTACTCCAAAGAGTACAGGGGCTCAGGTCCAGGTGGCA	TGTTTTTCTCTGATTTTGAATTTCTTTTTACTGCAAAGAGTACAGGGGCTCAGGTCCAGGTGGCA
m5C	chr12:1505929(+)	BS-Seq (High)	Human	LINC00942,LINC00942:2,LINC00942:3	-	chr12:1505929..1505929	ICGC			AAAATCAAACAGCCTGGGCACAGTGGCTCACGCCTGTGATCCCAGCACTTTAGGAGGCCGAGGTG	AAAATCAAACAGCCTGGGCACAGTGGCTCACGTCTGTGATCCCAGCACTTTAGGAGGCCGAGGTG
m5C	chr13:113150103(-)	BS-Seq (High)	Human	AL137002.2	rs1340990481	chr13:113150103..113150103	dbSNP153			CAGGGGGTTCTAAGGGTGGCCACGGTGGGGGCCAACTGTGCCAGGTCAGGTCGCTGCCTGGTGAG	CAGGGGGTTCTAAGGGTGGCCACGGTGGGGGCTAACTGTGCCAGGTCAGGTCGCTGCCTGGTGAG
m5C	chr13:20704087(-)	BS-Seq (High)	Human	lnc-EEF1AKMT1-3	rs1408738998	chr13:20704087..20704087	dbSNP153			CCAGTAGCTCCTCCGGCCGGTCCGCGCAGCCCCGCGGCCGCGCGGGGCGCCTGCCCGCCCTCGGG	CCAGTAGCTCCTCCGGCCGGTCCGCGCAGCCCAGCGGCCGCGCGGGGCGCCTGCCCGCCCTCGGG
m5C	chr13:20704140(-)	BS-Seq (High)	Human	lnc-EEF1AKMT1-3	rs1170611203	chr13:20704140..20704140	dbSNP153	RBP 1		CGTGTGGTGGAAGGCACTGAGCACGCCGGCCGCCAGGCGCCCGTACAGCTGCTCCAGTAGCTCCT	CGTGTGGTGGAAGGCACTGAGCACGCCGGCCGTCAGGCGCCCGTACAGCTGCTCCAGTAGCTCCT
m5C	chr13:20704142(-)	BS-Seq (High)	Human	lnc-EEF1AKMT1-3	rs1464491919	chr13:20704142..20704142	dbSNP153			AGCGTGTGGTGGAAGGCACTGAGCACGCCGGCCGCCAGGCGCCCGTACAGCTGCTCCAGTAGCTC	AGCGTGTGGTGGAAGGCACTGAGCACGCCGGCTGCCAGGCGCCCGTACAGCTGCTCCAGTAGCTC
m5C	chr13:20704142(-)	BS-Seq (High)	Human	lnc-EEF1AKMT1-3	rs1464491919	chr13:20704142..20704142	dbSNP153			AGCGTGTGGTGGAAGGCACTGAGCACGCCGGCCGCCAGGCGCCCGTACAGCTGCTCCAGTAGCTC	AGCGTGTGGTGGAAGGCACTGAGCACGCCGGCAGCCAGGCGCCCGTACAGCTGCTCCAGTAGCTC
m5C	chr13:20704147(-)	BS-Seq (High)	Human	lnc-EEF1AKMT1-3	rs1317402301	chr13:20704147..20704147	dbSNP153			GCTGCAGCGTGTGGTGGAAGGCACTGAGCACGCCGGCCGCCAGGCGCCCGTACAGCTGCTCCAGT	GCTGCAGCGTGTGGTGGAAGGCACTGAGCACGTCGGCCGCCAGGCGCCCGTACAGCTGCTCCAGT
m5C	chr13:20704147(-)	BS-Seq (High)	Human	lnc-EEF1AKMT1-3	rs1317402301	chr13:20704147..20704147	dbSNP153			GCTGCAGCGTGTGGTGGAAGGCACTGAGCACGCCGGCCGCCAGGCGCCCGTACAGCTGCTCCAGT	GCTGCAGCGTGTGGTGGAAGGCACTGAGCACGACGGCCGCCAGGCGCCCGTACAGCTGCTCCAGT
m5C	chr13:75569461(+)	BS-Seq (High)	Human	AL137782.1,UCHL3	rs893868751	chr13:75569461..75569461	dbSNP153	RBP 3 Splice 13 circRNA 23		TTTCCAATGAATACCTTTATTCTTATTACAGGCCATCCGAGTTACTCATGAGACCAGTGCCCATG	TTTCCAATGAATACCTTTATTCTTATTACAGGACATCCGAGTTACTCATGAGACCAGTGCCCATG
m5C	chr13:75569465(+)	BS-Seq (High)	Human	AL137782.1,UCHL3	rs761371610	chr13:75569465..75569465	dbSNP153	RBP 4 Splice 13 circRNA 23		CAATGAATACCTTTATTCTTATTACAGGCCATCCGAGTTACTCATGAGACCAGTGCCCATGAAGG	CAATGAATACCTTTATTCTTATTACAGGCCATGCGAGTTACTCATGAGACCAGTGCCCATGAAGG
m5C	chr13:48975853(-)	BS-Seq (High)	Human	AL161421.1	rs1047810817	chr13:48975853..48975853	dbSNP153			TGCGGCTGCGCGGGCCCCGCCGACGGAGCCCGCGGCCGGGACCCCGAACCCCCGCCTCGAGCCCG	TGCGGCTGCGCGGGCCCCGCCGACGGAGCCCGAGGCCGGGACCCCGAACCCCCGCCTCGAGCCCG
m5C	chr13:48975868(-)	BS-Seq (High)	Human	AL161421.1	rs1363338646	chr13:48975868..48975868	dbSNP153			AGTCGGCGCGCCGAGTGCGGCTGCGCGGGCCCCGCCGACGGAGCCCGCGGCCGGGACCCCGAACC	AGTCGGCGCGCCGAGTGCGGCTGCGCGGGCCCTGCCGACGGAGCCCGCGGCCGGGACCCCGAACC
m5C	chr13:48975868(-)	BS-Seq (High)	Human	AL161421.1	rs1363338646	chr13:48975868..48975868	dbSNP153			AGTCGGCGCGCCGAGTGCGGCTGCGCGGGCCCCGCCGACGGAGCCCGCGGCCGGGACCCCGAACC	AGTCGGCGCGCCGAGTGCGGCTGCGCGGGCCCAGCCGACGGAGCCCGCGGCCGGGACCCCGAACC
m5C	chr13:48975869(-)	BS-Seq (High)	Human	AL161421.1	rs1423394905	chr13:48975869..48975869	dbSNP153			AAGTCGGCGCGCCGAGTGCGGCTGCGCGGGCCCCGCCGACGGAGCCCGCGGCCGGGACCCCGAAC	AAGTCGGCGCGCCGAGTGCGGCTGCGCGGGCCTCGCCGACGGAGCCCGCGGCCGGGACCCCGAAC
m5C	chr13:48975870(-)	BS-Seq (High)	Human	AL161421.1	rs564487153	chr13:48975870..48975870	dbSNP153			GAAGTCGGCGCGCCGAGTGCGGCTGCGCGGGCCCCGCCGACGGAGCCCGCGGCCGGGACCCCGAA	GAAGTCGGCGCGCCGAGTGCGGCTGCGCGGGCTCCGCCGACGGAGCCCGCGGCCGGGACCCCGAA
m5C	chr13:48975870(-)	BS-Seq (High)	Human	AL161421.1	rs564487153	chr13:48975870..48975870	dbSNP153			GAAGTCGGCGCGCCGAGTGCGGCTGCGCGGGCCCCGCCGACGGAGCCCGCGGCCGGGACCCCGAA	GAAGTCGGCGCGCCGAGTGCGGCTGCGCGGGCGCCGCCGACGGAGCCCGCGGCCGGGACCCCGAA
m5C	chr13:48975871(-)	BS-Seq (High)	Human	AL161421.1	rs1332382401	chr13:48975871..48975871	dbSNP153			CGAAGTCGGCGCGCCGAGTGCGGCTGCGCGGGCCCCGCCGACGGAGCCCGCGGCCGGGACCCCGA	CGAAGTCGGCGCGCCGAGTGCGGCTGCGCGGGTCCCGCCGACGGAGCCCGCGGCCGGGACCCCGA
m5C	chr13:48975871(-)	BS-Seq (High)	Human	AL161421.1	rs1332382401	chr13:48975871..48975871	dbSNP153			CGAAGTCGGCGCGCCGAGTGCGGCTGCGCGGGCCCCGCCGACGGAGCCCGCGGCCGGGACCCCGA	CGAAGTCGGCGCGCCGAGTGCGGCTGCGCGGGACCCGCCGACGGAGCCCGCGGCCGGGACCCCGA
m5C	chr13:50172413(+)	BS-Seq (High)	Human	ST13P4,DLEU1	rs774691884	chr13:50172413..50172413	dbSNP153	miRNA 3		AAAATGCGGAGATAACAGAGGAGGTGATGGATCAGGCAAATGATAAAAAAGTGGCTGCTATTGAA	AAAATGCGGAGATAACAGAGGAGGTGATGGATTAGGCAAATGATAAAAAAGTGGCTGCTATTGAA
m5C	chr13:100540147(-)	BS-Seq (High)	Human	AL356966.1,GGACT,RPS26P47	rs55854639	chr13:100540147..100540147	dbSNP153	RBP 2 miRNA 1		ACTAACTGTGCCCGATGCGTGCCCAAGGACAACGCCATTAAGAAATTCGTCATTCGAAACATAGT	ACTAACTGTGCCCGATGCGTGCCCAAGGACAATGCCATTAAGAAATTCGTCATTCGAAACATAGT
m5C	chr13:100540147(-)	BS-Seq (High)	Human	AL356966.1,GGACT,RPS26P47	rs55854639	chr13:100540147..100540147	dbSNP153	RBP 2 miRNA 1		ACTAACTGTGCCCGATGCGTGCCCAAGGACAACGCCATTAAGAAATTCGTCATTCGAAACATAGT	ACTAACTGTGCCCGATGCGTGCCCAAGGACAAGGCCATTAAGAAATTCGTCATTCGAAACATAGT
m5C	chr14:95534125(-)	BS-Seq (High)	Human	SNHG10	rs926858359	chr14:95534125..95534125	dbSNP153	RBP 2 Splice 1		TCCTGCCTCGGCCTCTTAAAGTGCTGGGATTACAGGCGTGAGCCACCGCCCCCGGCCGCCTCTGA	TCCTGCCTCGGCCTCTTAAAGTGCTGGGATTAGAGGCGTGAGCCACCGCCCCCGGCCGCCTCTGA
m5C	chr14:100291332(-)	BS-Seq (High)	Human	AL157871.6,SLC25A29	rs1281825024	chr14:100291332..100291332	dbSNP153			GCCAAAGGTCAGTCCCTCTGCTCCCCAGCAAACGGTGCCTCCCAGGCATTCTCAGTGCCAGGGCT	GCCAAAGGTCAGTCCCTCTGCTCCCCAGCAAATGGTGCCTCCCAGGCATTCTCAGTGCCAGGGCT
m5C	chr14:101761790(+)	BS-Seq (High)	Human	NONHSAG015959.2-001	rs547036580	chr14:101761781..101761790	dbSNP153	RBP 1		AGCAAGCGAAAGACTCAGTCCCCGGGCGGCGGCGGCGGCGGCGGCCGCGGGGGCGCGACGGCCGG	AGCAAGCGAAAGACTCAGTCCCCG_________GGCGGCGGCGGCCGCGGGGGCGCGACGGCCGG
m5C	chr14:101761790(+)	BS-Seq (High)	Human	NONHSAG015959.2-001	rs547036580	chr14:101761781..101761790	dbSNP153	RBP 1		AGCAAGCGAAAGACTCAGTCCCCGGGCGGCGGCGGCGGCGGCGGCCGCGGGGGCGCGACGGCCGG	AGCAAGCGAAAGACTCAGTCCCCGGGC______GGCGGCGGCGGCCGCGGGGGCGCGACGGCCGG
m5C	chr14:101761790(+)	BS-Seq (High)	Human	NONHSAG015959.2-001	rs547036580	chr14:101761781..101761790	dbSNP153	RBP 1		AGCAAGCGAAAGACTCAGTCCCCGGGCGGCGGCGGCGGCGGCGGCCGCGGGGGCGCGACGGCCGG	AGCAAGCGAAAGACTCAGTCCCCGGGCGGC___GGCGGCGGCGGCCGCGGGGGCGCGACGGCCGG
m5C	chr14:101761784(+)	BS-Seq (High)	Human	NONHSAG015959.2-001	rs1449944938	chr14:101761784..101761784	dbSNP153	RBP 1		AGCGAGAGCAAGCGAAAGACTCAGTCCCCGGGCGGCGGCGGCGGCGGCGGCCGCGGGGGCGCGAC	AGCGAGAGCAAGCGAAAGACTCAGTCCCCGGGTGGCGGCGGCGGCGGCGGCCGCGGGGGCGCGAC
m5C	chr14:101761787(+)	BS-Seq (High)	Human	NONHSAG015959.2-001	rs1324523964	chr14:101761787..101761787	dbSNP153	RBP 1		GAGAGCAAGCGAAAGACTCAGTCCCCGGGCGGCGGCGGCGGCGGCGGCCGCGGGGGCGCGACGGC	GAGAGCAAGCGAAAGACTCAGTCCCCGGGCGGTGGCGGCGGCGGCGGCCGCGGGGGCGCGACGGC
m5C	chr14:101761790(+)	BS-Seq (High)	Human	NONHSAG015959.2-001	rs1459661151	chr14:101761790..101761790	dbSNP153	RBP 1		AGCAAGCGAAAGACTCAGTCCCCGGGCGGCGGCGGCGGCGGCGGCCGCGGGGGCGCGACGGCCGG	AGCAAGCGAAAGACTCAGTCCCCGGGCGGCGGTGGCGGCGGCGGCCGCGGGGGCGCGACGGCCGG
m5C	chr14:105168560(-)	BS-Seq (High)	Human	JAG2,AL512356.1	rs1467613388	chr14:105168529..105168561	dbSNP153	RBP 1		GCGCCGCGGCGCTGCGCTCGACCCCGCCCGCGCCGCCGCCGCCGCCGCCTCTGCCGCTGCCGCTG	GCGCCGCGGCGCTGCGCTCGACCCCGCCCGC________________________________TG
m5C	chr14:105168551(-)	BS-Seq (High)	Human	JAG2,AL512356.1	rs1259929874	chr14:105168543..105168552	dbSNP153	RBP 1		CGCTGCGCTCGACCCCGCCCGCGCCGCCGCCGCCGCCGCCTCTGCCGCTGCCGCTGCCTCTGCGG	CGCTGCGCTCGACCCCGCCCGCGCCGCCGCC_________TCTGCCGCTGCCGCTGCCTCTGCGG
m5C	chr14:105168551(-)	BS-Seq (High)	Human	JAG2,AL512356.1	rs1259929874	chr14:105168543..105168552	dbSNP153	RBP 1		CGCTGCGCTCGACCCCGCCCGCGCCGCCGCCGCCGCCGCCTCTGCCGCTGCCGCTGCCTCTGCGG	CGCTGCGCTCGACCCCGCCCGCGCCGCCGCC______GCCTCTGCCGCTGCCGCTGCCTCTGCGG
m5C	chr14:105168551(-)	BS-Seq (High)	Human	JAG2,AL512356.1	rs1259929874	chr14:105168543..105168552	dbSNP153	RBP 1		CGCTGCGCTCGACCCCGCCCGCGCCGCCGCCGCCGCCGCCTCTGCCGCTGCCGCTGCCTCTGCGG	CGCTGCGCTCGACCCCGCCCGCGCCGCCGCC___GCCGCCTCTGCCGCTGCCGCTGCCTCTGCGG
m5C	chr14:105168547(-)	BS-Seq (High)	Human	JAG2,AL512356.1	rs1216263734	chr14:105168547..105168547	dbSNP153			GCGCTCGACCCCGCCCGCGCCGCCGCCGCCGCCGCCTCTGCCGCTGCCGCTGCCTCTGCGGGCGC	GCGCTCGACCCCGCCCGCGCCGCCGCCGCCGCTGCCTCTGCCGCTGCCGCTGCCTCTGCGGGCGC
m5C	chr14:105168551(-)	BS-Seq (High)	Human	JAG2,AL512356.1	rs1392031900	chr14:105168551..105168551	dbSNP153	RBP 1		CGCTGCGCTCGACCCCGCCCGCGCCGCCGCCGCCGCCGCCTCTGCCGCTGCCGCTGCCTCTGCGG	CGCTGCGCTCGACCCCGCCCGCGCCGCCGCCGTCGCCGCCTCTGCCGCTGCCGCTGCCTCTGCGG
m5C	chr14:105168554(-)	BS-Seq (High)	Human	JAG2,AL512356.1	rs1269178771	chr14:105168554..105168554	dbSNP153	RBP 1		CGGCGCTGCGCTCGACCCCGCCCGCGCCGCCGCCGCCGCCGCCTCTGCCGCTGCCGCTGCCTCTG	CGGCGCTGCGCTCGACCCCGCCCGCGCCGCCGTCGCCGCCGCCTCTGCCGCTGCCGCTGCCTCTG
m5C	chr14:105168556(-)	BS-Seq (High)	Human	JAG2,AL512356.1	rs1381822602	chr14:105168556..105168556	dbSNP153	RBP 2		CGCGGCGCTGCGCTCGACCCCGCCCGCGCCGCCGCCGCCGCCGCCTCTGCCGCTGCCGCTGCCTC	CGCGGCGCTGCGCTCGACCCCGCCCGCGCCGCTGCCGCCGCCGCCTCTGCCGCTGCCGCTGCCTC
m5C	chr14:105168601(-)	BS-Seq (High)	Human	JAG2,AL512356.1	rs907497413	chr14:105168585..105168602	dbSNP153	RBP 1		GGAGCTGCCGCCGCCCCTGCACGCCCGCCGCCCAGGCCCGCGCGCCGCGGCGCTGCGCTCGACCC	GGAGCTGCCGCCGCCCCTGCACGCCCGCCGC_________________GGCGCTGCGCTCGACCC
m5C	chr14:105168602(-)	BS-Seq (High)	Human	JAG2,AL512356.1	rs907497413	chr14:105168585..105168602	dbSNP153	RBP 1		CGGAGCTGCCGCCGCCCCTGCACGCCCGCCGCCCAGGCCCGCGCGCCGCGGCGCTGCGCTCGACC	CGGAGCTGCCGCCGCCCCTGCACGCCCGCCGC_________________GGCGCTGCGCTCGACC
m5C	chr14:105168601(-)	BS-Seq (High)	Human	JAG2,AL512356.1	rs1355580096	chr14:105168601..105168601	dbSNP153	RBP 1		GGAGCTGCCGCCGCCCCTGCACGCCCGCCGCCCAGGCCCGCGCGCCGCGGCGCTGCGCTCGACCC	GGAGCTGCCGCCGCCCCTGCACGCCCGCCGCCAAGGCCCGCGCGCCGCGGCGCTGCGCTCGACCC
m5C	chr14:61736919(+)	m5C-RIP-seq (High)	Human	HIF1A,AL137129.1	rs991312399	chr14:61736919..61736919	dbSNP153	RBP 19 Splice 5 miRNA 2 circRNA 28		AGTGGTATTATTCAGCACGACTTGATTTTCTCCCTTCAACAAACAGAATGTGTCCTTAAACCGGT	AGTGGTATTATTCAGCACGACTTGATTTTCTCTCTTCAACAAACAGAATGTGTCCTTAAACCGGT
m5C	chr14:73569553(-)	BS-Seq (High)	Human	AC005225.2	rs779664710	chr14:73569553..73569553	dbSNP153			GCGGTAGCGCGCGTGGGCCTGGAAAAGCGCGCCCTTCTCGTCGCGCAGGGACGCGCGCAGCGTGA	GCGGTAGCGCGCGTGGGCCTGGAAAAGCGCGCTCTTCTCGTCGCGCAGGGACGCGCGCAGCGTGA
m5C	chr14:73569775(-)	BS-Seq (High)	Human	AC005225.2	rs1292991348	chr14:73569775..73569775	dbSNP153			GCGCTCGTGCCGCGTCTGGCACAGCAGCCGCCCGGGGTCGGGGTCGTGGCCATCCAGCACCTCCA	GCGCTCGTGCCGCGTCTGGCACAGCAGCCGCCAGGGGTCGGGGTCGTGGCCATCCAGCACCTCCA
m5C	chr14:73569779(-)	BS-Seq (High)	Human	AC005225.2	rs1175609687	chr14:73569779..73569779	dbSNP153			AGTAGCGCTCGTGCCGCGTCTGGCACAGCAGCCGCCCGGGGTCGGGGTCGTGGCCATCCAGCACC	AGTAGCGCTCGTGCCGCGTCTGGCACAGCAGCTGCCCGGGGTCGGGGTCGTGGCCATCCAGCACC
m5C	chr14:73569819(-)	BS-Seq (High)	Human	AC005225.2	rs1264717087	chr14:73569819..73569819	dbSNP153			CCCACGCGCACCGGCTCGCGCCGCACCCCGGGCGGGAGGAAGTAGCGCTCGTGCCGCGTCTGGCA	CCCACGCGCACCGGCTCGCGCCGCACCCCGGGTGGGAGGAAGTAGCGCTCGTGCCGCGTCTGGCA
m5C	chr14:73569823(-)	BS-Seq (High)	Human	AC005225.2	rs757094009	chr14:73569823..73569823	dbSNP153			CCGGCCCACGCGCACCGGCTCGCGCCGCACCCCGGGCGGGAGGAAGTAGCGCTCGTGCCGCGTCT	CCGGCCCACGCGCACCGGCTCGCGCCGCACCCTGGGCGGGAGGAAGTAGCGCTCGTGCCGCGTCT
m5C	chr14:73569825(-)	BS-Seq (High)	Human	AC005225.2	rs1371287357	chr14:73569825..73569825	dbSNP153			ACCCGGCCCACGCGCACCGGCTCGCGCCGCACCCCGGGCGGGAGGAAGTAGCGCTCGTGCCGCGT	ACCCGGCCCACGCGCACCGGCTCGCGCCGCACACCGGGCGGGAGGAAGTAGCGCTCGTGCCGCGT
m5C	chr14:89417022(-)	BS-Seq (High)	Human	AL137230.3,FOXN3	rs1253448543	chr14:89417001..89417023	dbSNP153	RBP 1 circRNA 1		CCCGCGCCCCTGCCGCCCGCGCCCGCGGCCGCCCCCCGCCGCCCGCCGCCCCGGGCTCGCCGCGC	CCCGCGCCCCTGCCGCCCGCGCCCGCGGCCG______________________GGCTCGCCGCGC
m5C	chr14:89417013(-)	BS-Seq (High)	Human	AL137230.3,FOXN3	rs1269931939	chr14:89417004..89417014	dbSNP153	RBP 1 circRNA 1		CTGCCGCCCGCGCCCGCGGCCGCCCCCCGCCGCCCGCCGCCCCGGGCTCGCCGCGCCGCGCCCGC	CTGCCGCCCGCGCCCGCGGCCGCCCCCCGCC__________CCGGGCTCGCCGCGCCGCGCCCGC
m5C	chr14:89417020(-)	BS-Seq (High)	Human	AL137230.3,FOXN3	rs1274519966	chr14:89417010..89417020	dbSNP153	RBP 1 circRNA 1		CGCGCCCCTGCCGCCCGCGCCCGCGGCCGCCCCCCGCCGCCCGCCGCCCCGGGCTCGCCGCGCCG	CGCGCCCCTGCCGCCCGCGCCCGCGGCCGCCC__________GCCGCCCCGGGCTCGCCGCGCCG
m5C	chr14:89417019(-)	BS-Seq (High)	Human	AL137230.3,FOXN3	rs1274519966	chr14:89417010..89417020	dbSNP153	RBP 1 circRNA 1		GCGCCCCTGCCGCCCGCGCCCGCGGCCGCCCCCCGCCGCCCGCCGCCCCGGGCTCGCCGCGCCGC	GCGCCCCTGCCGCCCGCGCCCGCGGCCGCCC__________GCCGCCCCGGGCTCGCCGCGCCGC
m5C	chr14:89417021(-)	BS-Seq (High)	Human	AL137230.3,FOXN3	rs1373436204	chr14:89417021..89417021	dbSNP153	RBP 1 circRNA 1		CCGCGCCCCTGCCGCCCGCGCCCGCGGCCGCCCCCCGCCGCCCGCCGCCCCGGGCTCGCCGCGCC	CCGCGCCCCTGCCGCCCGCGCCCGCGGCCGCCACCCGCCGCCCGCCGCCCCGGGCTCGCCGCGCC
m5C	chr14:89417041(-)	BS-Seq (High)	Human	AL137230.3,FOXN3	rs1032085239	chr14:89417041..89417041	dbSNP153	RBP 1 circRNA 1		CCCATGCCGCGCCGCGACCCCCGCGCCCCTGCCGCCCGCGCCCGCGGCCGCCCCCCGCCGCCCGC	CCCATGCCGCGCCGCGACCCCCGCGCCCCTGCAGCCCGCGCCCGCGGCCGCCCCCCGCCGCCCGC
m5C	chr14:89417046(-)	BS-Seq (High)	Human	AL137230.3,FOXN3	rs1187765642	chr14:89417046..89417046	dbSNP153	RBP 1 circRNA 1		CAGGTCCCATGCCGCGCCGCGACCCCCGCGCCCCTGCCGCCCGCGCCCGCGGCCGCCCCCCGCCG	CAGGTCCCATGCCGCGCCGCGACCCCCGCGCCGCTGCCGCCCGCGCCCGCGGCCGCCCCCCGCCG
m5C	chr14:89417087(-)	BS-Seq (High)	Human	AL137230.3,FOXN3	rs1427618020	chr14:89417087..89417087	dbSNP153	RBP 2 circRNA 1		GGGGCCGGCGGGAGGACGCGCGGCGCGCCCGGCGGACGCCGCAGGTCCCATGCCGCGCCGCGACC	GGGGCCGGCGGGAGGACGCGCGGCGCGCCCGGGGGACGCCGCAGGTCCCATGCCGCGCCGCGACC
m5C	chr14:35825484(-)	BS-Seq (High)	Human	AL162311.3	rs1388303786	chr14:35825482..35825484	dbSNP153			CACTGCAACCTCCCTGCCTGATTCTCCTGCCTCAGCCTGCCGAGTGCCTGCGATTGCAGGCGCGT	CACTGCAACCTCCCTGCCTGATTCTCCTGCCT__GCCTGCCGAGTGCCTGCGATTGCAGGCGCGT
m5C	chr14:35825486(-)	BS-Seq (High)	Human	AL162311.3	rs1365404858	chr14:35825486..35825486	dbSNP153			CTCACTGCAACCTCCCTGCCTGATTCTCCTGCCTCAGCCTGCCGAGTGCCTGCGATTGCAGGCGC	CTCACTGCAACCTCCCTGCCTGATTCTCCTGCTTCAGCCTGCCGAGTGCCTGCGATTGCAGGCGC
m5C	chr14:35825491(-)	BS-Seq (High)	Human	AL162311.3	rs1292931521	chr14:35825491..35825491	dbSNP153			CTCGGCTCACTGCAACCTCCCTGCCTGATTCTCCTGCCTCAGCCTGCCGAGTGCCTGCGATTGCA	CTCGGCTCACTGCAACCTCCCTGCCTGATTCTTCTGCCTCAGCCTGCCGAGTGCCTGCGATTGCA
m5C	chr14:36509496(+)	miCLIP (High)	Human	AL132857.2	rs993252770	chr14:36509496..36509496	dbSNP153			CCAGCCGTCTCCCAGGCCCTCCCCACTAGGATCACCCCCTAAACACCACAGGCACATGACACAGT	CCAGCCGTCTCCCAGGCCCTCCCCACTAGGATAACCCCCTAAACACCACAGGCACATGACACAGT
m5C	chr14:44887789(-)	BS-Seq (High)	Human	AL049870.2	rs1285290783	chr14:44887789..44887789	dbSNP153			TTATAAAAGAGATCTCAGGGCTGTGGTGGCGGCGGTGGAGGCTGAGGCGGCGGCTGAGGCGGCTA	TTATAAAAGAGATCTCAGGGCTGTGGTGGCGGTGGTGGAGGCTGAGGCGGCGGCTGAGGCGGCTA
m5C	chr14:49862608(-)	BS-Seq (High)	Human	RN7SL2,AL627171.4	rs942467817	chr14:49862608..49862608	dbSNP153	RBP 24 Splice 2 miRNA 3 circRNA 12		GTCAAAACTCCCGTGCTGATCAGTAGTGGGATCGCGCCTGTGAATAGCCACTGCACTCCAGCCTG	GTCAAAACTCCCGTGCTGATCAGTAGTGGGATTGCGCCTGTGAATAGCCACTGCACTCCAGCCTG
m5C	chr14:49862804(-)	BS-Seq (High)	Human	RN7SL2,AL627171.4	rs1368001187	chr14:49862804..49862804	dbSNP153	RBP 5 miRNA 1		GCGCGTGCCTGTAGTCCCAGCTACTCGGGAGGCTGAGGTGGGAGGATCGCTTGAGCCCAGGAGTT	GCGCGTGCCTGTAGTCCCAGCTACTCGGGAGGTTGAGGTGGGAGGATCGCTTGAGCCCAGGAGTT
m5C	chr14:49862811(-)	BS-Seq (High)	Human	RN7SL2,AL627171.4	rs200214310	chr14:49862811..49862811	dbSNP153	RBP 24 miRNA 1		CGCGGTGGCGCGTGCCTGTAGTCCCAGCTACTCGGGAGGCTGAGGTGGGAGGATCGCTTGAGCCC	CGCGGTGGCGCGTGCCTGTAGTCCCAGCTACTTGGGAGGCTGAGGTGGGAGGATCGCTTGAGCCC
m5C	chr14:49862813(-)	BS-Seq (High)	Human	RN7SL2,AL627171.4	rs1211133744	chr14:49862813..49862813	dbSNP153	RBP 24		GGCGCGGTGGCGCGTGCCTGTAGTCCCAGCTACTCGGGAGGCTGAGGTGGGAGGATCGCTTGAGC	GGCGCGGTGGCGCGTGCCTGTAGTCCCAGCTATTCGGGAGGCTGAGGTGGGAGGATCGCTTGAGC
m5C	chr14:49862816(-)	BS-Seq (High)	Human	RN7SL2,AL627171.4	rs754710729	chr14:49862816..49862816	dbSNP153	RBP 24		CCGGGCGCGGTGGCGCGTGCCTGTAGTCCCAGCTACTCGGGAGGCTGAGGTGGGAGGATCGCTTG	CCGGGCGCGGTGGCGCGTGCCTGTAGTCCCAGTTACTCGGGAGGCTGAGGTGGGAGGATCGCTTG
m5C	chr14:49862819(-)	BS-Seq (High)	Human	RN7SL2,AL627171.4	rs1459855539	chr14:49862819..49862819	dbSNP153	RBP 24		CCGCCGGGCGCGGTGGCGCGTGCCTGTAGTCCCAGCTACTCGGGAGGCTGAGGTGGGAGGATCGC	CCGCCGGGCGCGGTGGCGCGTGCCTGTAGTCCTAGCTACTCGGGAGGCTGAGGTGGGAGGATCGC
m5C	chr14:49862820(-)	BS-Seq (High)	Human	RN7SL2,AL627171.4	rs917883085	chr14:49862820..49862820	dbSNP153	RBP 24		ACCGCCGGGCGCGGTGGCGCGTGCCTGTAGTCCCAGCTACTCGGGAGGCTGAGGTGGGAGGATCG	ACCGCCGGGCGCGGTGGCGCGTGCCTGTAGTCTCAGCTACTCGGGAGGCTGAGGTGGGAGGATCG
m5C	chr14:49862821(-)	BS-Seq (High)	Human	RN7SL2,AL627171.4	rs1248571101	chr14:49862821..49862821	dbSNP153	RBP 24		GACCGCCGGGCGCGGTGGCGCGTGCCTGTAGTCCCAGCTACTCGGGAGGCTGAGGTGGGAGGATC	GACCGCCGGGCGCGGTGGCGCGTGCCTGTAGTTCCAGCTACTCGGGAGGCTGAGGTGGGAGGATC
m5C	chr14:49862828(-)	BS-Seq (High)	Human	RN7SL2,AL627171.4	rs1193825128	chr14:49862828..49862828	dbSNP153	RBP 24 miRNA 1		CGTCTCCGACCGCCGGGCGCGGTGGCGCGTGCCTGTAGTCCCAGCTACTCGGGAGGCTGAGGTGG	CGTCTCCGACCGCCGGGCGCGGTGGCGCGTGCTTGTAGTCCCAGCTACTCGGGAGGCTGAGGTGG
m5C	chr14:49862835(-)	BS-Seq (High)	Human	RN7SL2,AL627171.4	rs1244770840	chr14:49862835..49862835	dbSNP153	RBP 24 miRNA 1		TTCGCAGCGTCTCCGACCGCCGGGCGCGGTGGCGCGTGCCTGTAGTCCCAGCTACTCGGGAGGCT	TTCGCAGCGTCTCCGACCGCCGGGCGCGGTGGTGCGTGCCTGTAGTCCCAGCTACTCGGGAGGCT
m5C	chr14:20343234(-)	BS-Seq (High)	Human	AL355075.4,RPPH1	rs1427336824	chr14:20343234..20343234	dbSNP153	RBP 24 miRNA 6 circRNA 21		GAGAACGGGGCTCCGCGCGAGGTCAGACTGGGCAGGAGATGCCGTGGACCCCGCCCTTCGGGGAG	GAGAACGGGGCTCCGCGCGAGGTCAGACTGGGAAGGAGATGCCGTGGACCCCGCCCTTCGGGGAG
m5C	chr14:22557039(-)	BS-Seq (High)	Human	LINC02332	rs1299303987	chr14:22557039..22557039	dbSNP153	Splice 1		TTTGGGTTTCAGGTTCTGCGGCTCCCTGAGACCAGCAGATTCCTGGTCTCCGGGTCCCTGGGTCC	TTTGGGTTTCAGGTTCTGCGGCTCCCTGAGACGAGCAGATTCCTGGTCTCCGGGTCCCTGGGTCC
m5C	chr14:23263470(-)	BS-Seq (High)	Human	lnc-HOMEZ-4	rs1202360828	chr14:23263470..23263470	dbSNP153			ACCTGACCCCCAGTCATTGATTACCAGTTTGTCTGGCAATCTGGACTTTCCAGTGATGCCACTGA	ACCTGACCCCCAGTCATTGATTACCAGTTTGTTTGGCAATCTGGACTTTCCAGTGATGCCACTGA
m5C	chr14:44887789(-)	BS-Seq (High)	Human	AL049870.2	rs1285290783	chr14:44887789..44887789	ICGC			TTATAAAAGAGATCTCAGGGCTGTGGTGGCGGCGGTGGAGGCTGAGGCGGCGGCTGAGGCGGCTA	TTATAAAAGAGATCTCAGGGCTGTGGTGGCGGTGGTGGAGGCTGAGGCGGCGGCTGAGGCGGCTA
m5C	chr14:29324849(+)	miCLIP (High)	Human	AL135878.1	-	chr14:29324849..29324849	ICGC			TATTCTACAAGGTTCAGAGACCTCATCTATTTCACCCCTTTACAGTTACCAATTCCATGTCATCT	TATTCTACAAGGTTCAGAGACCTCATCTATTTTACCCCTTTACAGTTACCAATTCCATGTCATCT
m5C	chr15:30488052(+)	BS-Seq (High)	Human	AC127502.1,AC127502.2	rs1474172594	chr15:30488052..30488052	dbSNP153			TTTTTGAGGGGGACGGAGTCTCGCTCTGTCGCCCAGGCTGGAGTGCAGTGGCACGATCTCGGCTC	TTTTTGAGGGGGACGGAGTCTCGCTCTGTCGCGCAGGCTGGAGTGCAGTGGCACGATCTCGGCTC
m5C	chr15:41027642(+)	BS-Seq (High)	Human	INO80-AS1	rs770381074	chr15:41027642..41027642	dbSNP153	Splice 1		CACACAAAAAAGATGGCAGCTCAGTGAGCAGGCAGCGACGCAGCGAGGAGGTAGCTGATCTCCGC	CACACAAAAAAGATGGCAGCTCAGTGAGCAGGTAGCGACGCAGCGAGGAGGTAGCTGATCTCCGC
m5C	chr15:41027645(+)	BS-Seq (High)	Human	INO80-AS1	rs376025111	chr15:41027645..41027645	dbSNP153	Splice 1		ACAAAAAAGATGGCAGCTCAGTGAGCAGGCAGCGACGCAGCGAGGAGGTAGCTGATCTCCGCTGA	ACAAAAAAGATGGCAGCTCAGTGAGCAGGCAGTGACGCAGCGAGGAGGTAGCTGATCTCCGCTGA
m5C	chr15:41284073(+)	BS-Seq (High)	Human	OIP5-AS1,AC087721.2	rs1402068441	chr15:41284073..41284073	dbSNP153	RBP 16 Splice 11		TGCAAACTGGCCTCTGGGCCGGGGGCGAGCAGCCCCCGGGAGGCCGAGTGCATCTGTTGGACCGT	TGCAAACTGGCCTCTGGGCCGGGGGCGAGCAGTCCCCGGGAGGCCGAGTGCATCTGTTGGACCGT
m5C	chr15:41284074(+)	BS-Seq (High)	Human	OIP5-AS1,AC087721.2	rs920552370	chr15:41284074..41284074	dbSNP153	RBP 16 Splice 11		GCAAACTGGCCTCTGGGCCGGGGGCGAGCAGCCCCCGGGAGGCCGAGTGCATCTGTTGGACCGTG	GCAAACTGGCCTCTGGGCCGGGGGCGAGCAGCTCCCGGGAGGCCGAGTGCATCTGTTGGACCGTG
m5C	chr15:41284076(+)	BS-Seq (High)	Human	OIP5-AS1,AC087721.2	rs888257109	chr15:41284076..41284076	dbSNP153	RBP 15 Splice 11		AAACTGGCCTCTGGGCCGGGGGCGAGCAGCCCCCGGGAGGCCGAGTGCATCTGTTGGACCGTGCG	AAACTGGCCTCTGGGCCGGGGGCGAGCAGCCCTCGGGAGGCCGAGTGCATCTGTTGGACCGTGCG
m5C	chr15:41298811(+)	BS-Seq (High)	Human	OIP5-AS1,AC087721.2	rs1218280389	chr15:41298811..41298811	dbSNP153	RBP 2 circRNA 2		CAGCTACTCGTGAGGCTGAGGCAGGAGAATTGCTTGAATCCGGGAGGCGGAGGTTGCAGTGAACT	CAGCTACTCGTGAGGCTGAGGCAGGAGAATTGTTTGAATCCGGGAGGCGGAGGTTGCAGTGAACT
m5C	chr15:41298867(+)	BS-Seq (High)	Human	OIP5-AS1,AC087721.2	rs1268045610	chr15:41298867..41298867	dbSNP153	circRNA 2		CAGTGAACTGAGATTGCACCACTGCACTCCAGCCTGGGCGACAGAGTGAGACTCCGTCTCAGAAA	CAGTGAACTGAGATTGCACCACTGCACTCCAGTCTGGGCGACAGAGTGAGACTCCGTCTCAGAAA
m5C	chr15:41298873(+)	BS-Seq (High)	Human	OIP5-AS1,AC087721.2	rs1265091564	chr15:41298873..41298873	dbSNP153	RBP 1 circRNA 2		ACTGAGATTGCACCACTGCACTCCAGCCTGGGCGACAGAGTGAGACTCCGTCTCAGAAAAATAAA	ACTGAGATTGCACCACTGCACTCCAGCCTGGGTGACAGAGTGAGACTCCGTCTCAGAAAAATAAA
m5C	chr15:41299222(+)	BS-Seq (High)	Human	OIP5-AS1,AC087721.2	rs1215674639	chr15:41299222..41299222	dbSNP153	RBP 1 circRNA 2		GCTCACTGCAGTCTCTCCCACCCGGGTTCAAGCGATTCTCCTGCCTCAGCCTCCCAAGTAGCTAG	GCTCACTGCAGTCTCTCCCACCCGGGTTCAAGTGATTCTCCTGCCTCAGCCTCCCAAGTAGCTAG
m5C	chr15:41299227(+)	BS-Seq (High)	Human	OIP5-AS1,AC087721.2	rs1200693517	chr15:41299227..41299227	dbSNP153	RBP 1 circRNA 2		CTGCAGTCTCTCCCACCCGGGTTCAAGCGATTCTCCTGCCTCAGCCTCCCAAGTAGCTAGGATTA	CTGCAGTCTCTCCCACCCGGGTTCAAGCGATTTTCCTGCCTCAGCCTCCCAAGTAGCTAGGATTA
m5C	chr15:41299229(+)	BS-Seq (High)	Human	OIP5-AS1,AC087721.2	rs1254970707	chr15:41299229..41299229	dbSNP153	RBP 1 circRNA 2		GCAGTCTCTCCCACCCGGGTTCAAGCGATTCTCCTGCCTCAGCCTCCCAAGTAGCTAGGATTACA	GCAGTCTCTCCCACCCGGGTTCAAGCGATTCTTCTGCCTCAGCCTCCCAAGTAGCTAGGATTACA
m5C	chr15:41299242(+)	BS-Seq (High)	Human	OIP5-AS1,AC087721.2	rs1442315301	chr15:41299241..41299242	dbSNP153	RBP 1 circRNA 2		CCCGGGTTCAAGCGATTCTCCTGCCTCAGCCTCCCAAGTAGCTAGGATTACAGGCGCGCACCACC	CCCGGGTTCAAGCGATTCTCCTGCCTCAGCCT_CCAAGTAGCTAGGATTACAGGCGCGCACCACC
m5C	chr15:41302248(+)	BS-Seq (High)	Human	OIP5-AS1,AC087721.2	rs1017813843	chr15:41302248..41302248	dbSNP153			CCAGGTGCGGTGGCTTACACCTATAATCCCAGCACTTTGGGAGGCCAAGGTGGGCGGATCACAAG	CCAGGTGCGGTGGCTTACACCTATAATCCCAGAACTTTGGGAGGCCAAGGTGGGCGGATCACAAG
m5C	chr15:41302270(+)	BS-Seq (High)	Human	OIP5-AS1,AC087721.2	rs190132528	chr15:41302270..41302270	dbSNP153			ATAATCCCAGCACTTTGGGAGGCCAAGGTGGGCGGATCACAAGGTCAAGAGATCAGGACCATCCT	ATAATCCCAGCACTTTGGGAGGCCAAGGTGGGAGGATCACAAGGTCAAGAGATCAGGACCATCCT
m5C	chr15:41302270(+)	BS-Seq (High)	Human	OIP5-AS1,AC087721.2	rs190132528	chr15:41302270..41302270	dbSNP153			ATAATCCCAGCACTTTGGGAGGCCAAGGTGGGCGGATCACAAGGTCAAGAGATCAGGACCATCCT	ATAATCCCAGCACTTTGGGAGGCCAAGGTGGGTGGATCACAAGGTCAAGAGATCAGGACCATCCT
m5C	chr15:43197408(-)	BS-Seq (High)	Human	EPB42,AC068724.5	rs917222119	chr15:43197408..43197408	dbSNP153	Splice 5		CACCATGTGTGCCAAGTTCCAGTTCACGCCAACACATGTGGGGCTCCAGAGACTCACTGTGGAAG	CACCATGTGTGCCAAGTTCCAGTTCACGCCAATACATGTGGGGCTCCAGAGACTCACTGTGGAAG
m5C	chr15:92882900(+)	BS-Seq (High)	Human	LINC01578	rs1261320443	chr15:92882900..92882900	dbSNP153	RBP 14		GAGCTGTCAGGCGTTCCGCCGCGGCCGCGAGGCCCGCCGGCCGGCGGGGAGCTACGCCCGGACGG	GAGCTGTCAGGCGTTCCGCCGCGGCCGCGAGGGCCGCCGGCCGGCGGGGAGCTACGCCCGGACGG
m5C	chr15:92882901(+)	BS-Seq (High)	Human	LINC01578	rs1164471035	chr15:92882901..92882901	dbSNP153	RBP 14		AGCTGTCAGGCGTTCCGCCGCGGCCGCGAGGCCCGCCGGCCGGCGGGGAGCTACGCCCGGACGGC	AGCTGTCAGGCGTTCCGCCGCGGCCGCGAGGCGCGCCGGCCGGCGGGGAGCTACGCCCGGACGGC
m5C	chr15:92883075(+)	BS-Seq (High)	Human	LINC01578	rs1020455635	chr15:92883075..92883075	dbSNP153	RBP 7 miRNA 3		AAAGCGCCGCTGCGGTTGCCGCCTCGGAGGCTCCCCCGGGCCCCGGCGGCTGGACCCGGCGCGGG	AAAGCGCCGCTGCGGTTGCCGCCTCGGAGGCTTCCCCGGGCCCCGGCGGCTGGACCCGGCGCGGG
m5C	chr15:92897727(+)	BS-Seq (High)	Human	LINC01578,AC013394.1	rs933060052	chr15:92897727..92897727	dbSNP153	RBP 10 Splice 5 circRNA 4		CGTTTTTTTCTTTTAATTTTTTCATCAAGCACCCAGTCAGCTTGAAGAGTTTCAAATGGACCCTA	CGTTTTTTTCTTTTAATTTTTTCATCAAGCACGCAGTCAGCTTGAAGAGTTTCAAATGGACCCTA
m5C	chr15:101489842(+)	BS-Seq (High)	Human	lnc-OR4F6-5,lnc-OR4F6-5:2	rs1232128061	chr15:101489842..101489842	dbSNP153			GGAGGAGGAGGCGGCCGCGGCGCGTTCCCGCCCCCGGGCCCGCGCTCCTGCGACCGGGCTCCGGG	GGAGGAGGAGGCGGCCGCGGCGCGTTCCCGCCGCCGGGCCCGCGCTCCTGCGACCGGGCTCCGGG
m5C	chr15:101489870(+)	BS-Seq (High)	Human	lnc-OR4F6-5,lnc-OR4F6-5:2	rs1184097725	chr15:101489870..101489870	dbSNP153			CGCCCCCGGGCCCGCGCTCCTGCGACCGGGCTCCGGGGCCGAGAGCCGTCCGGGAGGCCCGAAAC	CGCCCCCGGGCCCGCGCTCCTGCGACCGGGCTACGGGGCCGAGAGCCGTCCGGGAGGCCCGAAAC
m5C	chr15:101489870(+)	BS-Seq (High)	Human	lnc-OR4F6-5,lnc-OR4F6-5:2	rs1184097725	chr15:101489870..101489870	dbSNP153			CGCCCCCGGGCCCGCGCTCCTGCGACCGGGCTCCGGGGCCGAGAGCCGTCCGGGAGGCCCGAAAC	CGCCCCCGGGCCCGCGCTCCTGCGACCGGGCTGCGGGGCCGAGAGCCGTCCGGGAGGCCCGAAAC
m5C	chr15:45198607(-)	miCLIP (High)	Human	SHF,AC051619.6	rs548952625	chr15:45198607..45198607	dbSNP153	RBP 24		CGCAGCAACCTCGGTTCGAATCCGAGTCACGGCATTGTGGGAACAATGGCACGGCAAGGGGCTCG	CGCAGCAACCTCGGTTCGAATCCGAGTCACGGTATTGTGGGAACAATGGCACGGCAAGGGGCTCG
m5C	chr15:45200414(-)	BS-Seq (High)	Human	SHF,AC051619.7	rs1356410515	chr15:45200414..45200414	dbSNP153	RBP 24 miRNA 1		CGCAGCAACCTCGGTTCGAATCCGAGTCACGGCATTGTGAGGACAATGGCACGGCAAGGGGAGTT	CGCAGCAACCTCGGTTCGAATCCGAGTCACGGTATTGTGAGGACAATGGCACGGCAAGGGGAGTT
m5C	chr15:50364665(+)	BS-Seq (High)	Human	GABPB1-AS1	rs942857800	chr15:50364665..50364665	dbSNP153	RBP 1		CATAGTCTCGATCTGTCGCCCAGGCTGGGGTGCAGTGGCGTGATATTGGGTCACTGCAACCTCCG	CATAGTCTCGATCTGTCGCCCAGGCTGGGGTGTAGTGGCGTGATATTGGGTCACTGCAACCTCCG
m5C	chr15:50364671(+)	BS-Seq (High)	Human	GABPB1-AS1	rs1373321222	chr15:50364671..50364671	dbSNP153	RBP 1		CTCGATCTGTCGCCCAGGCTGGGGTGCAGTGGCGTGATATTGGGTCACTGCAACCTCCGTCTCCC	CTCGATCTGTCGCCCAGGCTGGGGTGCAGTGGTGTGATATTGGGTCACTGCAACCTCCGTCTCCC
m5C	chr15:51458733(+)	BS-Seq (High)	Human	AC066613.2,AC066613.1	rs776996655	chr15:51458733..51458733	dbSNP153	Splice 2 circRNA 1		GCTTTTACCTTATTAACAGAAAATGCCATGATCATATCAGATTCCTTATGGATGACTTTCGCCTT	GCTTTTACCTTATTAACAGAAAATGCCATGATAATATCAGATTCCTTATGGATGACTTTCGCCTT
m5C	chr15:56918310(-)	m5C-RIP-seq (High)	Human	AC090517.4,AC090517.5	rs1027183790	chr15:56918310..56918310	dbSNP153	RBP 1		GCGTTGGTCTTGCTGGTTCTCGGCCCCCGAAGCGGAGCGACGGAGACACAGCTGTGGAAGCATCT	GCGTTGGTCTTGCTGGTTCTCGGCCCCCGAAGTGGAGCGACGGAGACACAGCTGTGGAAGCATCT
m5C	chr15:89335107(+)	miCLIP (High)	Human	AC124068.2	rs1321708667	chr15:89335107..89335107	dbSNP153	RBP 24		CCGCGTGGCCTAATGGATAAGGCGTCTGACTTCGGATCAGAAGATTGCAGGTTCGAGTCCTGCCG	CCGCGTGGCCTAATGGATAAGGCGTCTGACTTTGGATCAGAAGATTGCAGGTTCGAGTCCTGCCG
m5C	chr15:89335112(+)	miCLIP (High)	Human	AC124068.2	rs866865100	chr15:89335112..89335112	dbSNP153	RBP 25		TGGCCTAATGGATAAGGCGTCTGACTTCGGATCAGAAGATTGCAGGTTCGAGTCCTGCCGCGGTC	TGGCCTAATGGATAAGGCGTCTGACTTCGGATGAGAAGATTGCAGGTTCGAGTCCTGCCGCGGTC
m5C	chr15:89335112(+)	miCLIP (High)	Human	AC124068.2	rs866865100	chr15:89335112..89335112	dbSNP153	RBP 25		TGGCCTAATGGATAAGGCGTCTGACTTCGGATCAGAAGATTGCAGGTTCGAGTCCTGCCGCGGTC	TGGCCTAATGGATAAGGCGTCTGACTTCGGATTAGAAGATTGCAGGTTCGAGTCCTGCCGCGGTC
m5C	chr15:101489842(+)	BS-Seq (High)	Human	lnc-OR4F6-5,lnc-OR4F6-5:2	-	chr15:101489842..101489842	COSMIC			GGAGGAGGAGGCGGCCGCGGCGCGTTCCCGCCCCCGGGCCCGCGCTCCTGCGACCGGGCTCCGGG	GGAGGAGGAGGCGGCCGCGGCGCGTTCCCGCCTCCGGGCCCGCGCTCCTGCGACCGGGCTCCGGG
m5C	chr15:41298794(+)	BS-Seq (High)	Human	OIP5-AS1,AC087721.2	-	chr15:41298788..41298794	ICGC	RBP 3 circRNA 2		GTAGATACGTGTAATCCCAGCTACTCGTGAGGCTGAGGCAGGAGAATTGCTTGAATCCGGGAGGC	GTAGATACGTGTAATCCCAGCTACTCG______TGAGGCAGGAGAATTGCTTGAATCCGGGAGGC
m5C	chr15:55385710(-)	BS-Seq (High)	Human	CCPG1,DNAAF4-CCPG1	-	chr15:55385710..55385710	TCGA,ICGC,COSMIC	RBP 4 Splice 10 circRNA 14		TAACTGAAAGATTATCACTTTTCCTTAGGGGTCAGATATAGAAATGTTGAATTCTGTGACCCCCA	TAACTGAAAGATTATCACTTTTCCTTAGGGGTAAGATATAGAAATGTTGAATTCTGTGACCCCCA
m5C	chr15:92882901(+)	BS-Seq (High)	Human	LINC01578	-	chr15:92882901..92882901	ICGC	RBP 14		AGCTGTCAGGCGTTCCGCCGCGGCCGCGAGGCCCGCCGGCCGGCGGGGAGCTACGCCCGGACGGC	AGCTGTCAGGCGTTCCGCCGCGGCCGCGAGGCTCGCCGGCCGGCGGGGAGCTACGCCCGGACGGC
m5C	chr15:43197408(-)	BS-Seq (High)	Human	EPB42,AC068724.5	-	chr15:43197408..43197408	TCGA	Splice 5		CACCATGTGTGCCAAGTTCCAGTTCACGCCAACACATGTGGGGCTCCAGAGACTCACTGTGGAAG	CACCATGTGTGCCAAGTTCCAGTTCACGCCAAGACATGTGGGGCTCCAGAGACTCACTGTGGAAG
m5C	chr15:89575667(+)	BS-Seq (High)	Human	AC013391.2,TICRR	-	chr15:89575667..89575667	COSMIC	RBP 5		GCCGCCCGCCACAGCCGGGTCCGGCGGGCCGCCCTGCGCCTCCTCACCTATCTGAGTTGCCGATT	GCCGCCCGCCACAGCCGGGTCCGGCGGGCCGCTCTGCGCCTCCTCACCTATCTGAGTTGCCGATT
m5C	chr15:51458733(+)	BS-Seq (High)	Human	AC066613.2,AC066613.1	-	chr15:51458733..51458733	COSMIC	Splice 2 circRNA 1		GCTTTTACCTTATTAACAGAAAATGCCATGATCATATCAGATTCCTTATGGATGACTTTCGCCTT	GCTTTTACCTTATTAACAGAAAATGCCATGATTATATCAGATTCCTTATGGATGACTTTCGCCTT
m5C	chr15:41027645(+)	BS-Seq (High)	Human	INO80-AS1	rs376025111	chr15:41027645..41027645	TCGA,ICGC,COSMIC	Splice 1		ACAAAAAAGATGGCAGCTCAGTGAGCAGGCAGCGACGCAGCGAGGAGGTAGCTGATCTCCGCTGA	ACAAAAAAGATGGCAGCTCAGTGAGCAGGCAGTGACGCAGCGAGGAGGTAGCTGATCTCCGCTGA
m5C	chr15:41284073(+)	BS-Seq (High)	Human	OIP5-AS1,AC087721.2	rs1402068441	chr15:41284073..41284073	ICGC	RBP 16 Splice 11		TGCAAACTGGCCTCTGGGCCGGGGGCGAGCAGCCCCCGGGAGGCCGAGTGCATCTGTTGGACCGT	TGCAAACTGGCCTCTGGGCCGGGGGCGAGCAGTCCCCGGGAGGCCGAGTGCATCTGTTGGACCGT
m5C	chr16:19114343(+)	BS-Seq (High)	Human	ITPRIPL2,AC099518.3	rs1423600384	chr16:19114343..19114343	dbSNP153	RBP 5 circRNA 2		CGGCCTCCCTCGGGCCTGCGTTCGGGAAGCCGCCGCGGAGGAGGAGACGGGGACAGCGGGGCTGC	CGGCCTCCCTCGGGCCTGCGTTCGGGAAGCCGTCGCGGAGGAGGAGACGGGGACAGCGGGGCTGC
m5C	chr16:19114457(+)	BS-Seq (High)	Human	ITPRIPL2,AC099518.3	rs1412342221	chr16:19114457..19114457	dbSNP153	RBP 1 circRNA 2		CTGGGCTGCTCGGCCACCGCCGCCCCGGGCGCCCGGCATGTCGGTGCACTACACCCTCAATCTAC	CTGGGCTGCTCGGCCACCGCCGCCCCGGGCGCTCGGCATGTCGGTGCACTACACCCTCAATCTAC
m5C	chr16:19115843(+)	BS-Seq (High)	Human	ITPRIPL2,AC099518.3	rs1459686603	chr16:19115843..19115843	dbSNP153	RBP 1 miRNA 6 circRNA 4		GCTCTTCCACTGCGTCCTGGGCCCTGGTGGGGCGGCTGCCGAGGTGGGTCCCCTGCCCAAGGCAC	GCTCTTCCACTGCGTCCTGGGCCCTGGTGGGGTGGCTGCCGAGGTGGGTCCCCTGCCCAAGGCAC
m5C	chr16:19116082(+)	BS-Seq (High)	Human	ITPRIPL2,AC099518.3	rs779240746	chr16:19116081..19116082	dbSNP153	RBP 1 miRNA 1 circRNA 4		TCCTTGAAGGTGAACCGTAAACCCTGACAGCACCCCCACCTGACCAAATGCTCCTAAAGCCTTTC	TCCTTGAAGGTGAACCGTAAACCCTGACAGCA_CCCCACCTGACCAAATGCTCCTAAAGCCTTTC
m5C	chr16:19116082(+)	BS-Seq (High)	Human	ITPRIPL2,AC099518.3	rs1348517181	chr16:19116082..19116082	dbSNP153	RBP 1 miRNA 1 circRNA 4		TCCTTGAAGGTGAACCGTAAACCCTGACAGCACCCCCACCTGACCAAATGCTCCTAAAGCCTTTC	TCCTTGAAGGTGAACCGTAAACCCTGACAGCATCCCCACCTGACCAAATGCTCCTAAAGCCTTTC
m5C	chr16:19116083(+)	BS-Seq (High)	Human	ITPRIPL2,AC099518.3	rs1227740037	chr16:19116083..19116083	dbSNP153	RBP 1 miRNA 2 circRNA 4		CCTTGAAGGTGAACCGTAAACCCTGACAGCACCCCCACCTGACCAAATGCTCCTAAAGCCTTTCC	CCTTGAAGGTGAACCGTAAACCCTGACAGCACTCCCACCTGACCAAATGCTCCTAAAGCCTTTCC
m5C	chr16:19116084(+)	BS-Seq (High)	Human	ITPRIPL2,AC099518.3	rs1334422759	chr16:19116084..19116084	dbSNP153,HGVD	RBP 1 miRNA 2 circRNA 4		CTTGAAGGTGAACCGTAAACCCTGACAGCACCCCCACCTGACCAAATGCTCCTAAAGCCTTTCCC	CTTGAAGGTGAACCGTAAACCCTGACAGCACCGCCACCTGACCAAATGCTCCTAAAGCCTTTCCC
m5C	chr16:19116085(+)	BS-Seq (High)	Human	ITPRIPL2,AC099518.3	rs368594072	chr16:19116085..19116085	dbSNP153	RBP 1 miRNA 2 circRNA 4		TTGAAGGTGAACCGTAAACCCTGACAGCACCCCCACCTGACCAAATGCTCCTAAAGCCTTTCCCA	TTGAAGGTGAACCGTAAACCCTGACAGCACCCGCACCTGACCAAATGCTCCTAAAGCCTTTCCCA
m5C	chr16:19116088(+)	BS-Seq (High)	Human	ITPRIPL2,AC099518.3	rs988610190	chr16:19116088..19116088	dbSNP153	RBP 1 miRNA 2 circRNA 4		AAGGTGAACCGTAAACCCTGACAGCACCCCCACCTGACCAAATGCTCCTAAAGCCTTTCCCACTG	AAGGTGAACCGTAAACCCTGACAGCACCCCCAACTGACCAAATGCTCCTAAAGCCTTTCCCACTG
m5C	chr16:19118325(+)	BS-Seq (High)	Human	ITPRIPL2,AC099518.3	rs1242281115	chr16:19118325..19118325	dbSNP153	circRNA 4		GTCTCTACTAAAAAATACAAAAATTAGCTGGGCGTGGTGGCGGGCGCCTGTAATCCCAGATACTC	GTCTCTACTAAAAAATACAAAAATTAGCTGGGTGTGGTGGCGGGCGCCTGTAATCCCAGATACTC
m5C	chr16:19118333(+)	BS-Seq (High)	Human	ITPRIPL2,AC099518.3	rs1417493358	chr16:19118333..19118333	dbSNP153	circRNA 4		TAAAAAATACAAAAATTAGCTGGGCGTGGTGGCGGGCGCCTGTAATCCCAGATACTCGGGAGGCT	TAAAAAATACAAAAATTAGCTGGGCGTGGTGGTGGGCGCCTGTAATCCCAGATACTCGGGAGGCT
m5C	chr16:19118339(+)	BS-Seq (High)	Human	ITPRIPL2,AC099518.3	rs1267342838	chr16:19118339..19118339	dbSNP153	circRNA 4		ATACAAAAATTAGCTGGGCGTGGTGGCGGGCGCCTGTAATCCCAGATACTCGGGAGGCTAAGGCA	ATACAAAAATTAGCTGGGCGTGGTGGCGGGCGTCTGTAATCCCAGATACTCGGGAGGCTAAGGCA
m5C	chr16:28977903(+)	BS-Seq (High)	Human	SPNS1,AC109460.3	rs753871768	chr16:28977903..28977903	dbSNP153	RBP 1 circRNA 2		TACCTGGGCTGAGCTGTGACTCTCTGCTTCCCCCTAGTGTTCATCTCCAGTTACATGGTGTTGGC	TACCTGGGCTGAGCTGTGACTCTCTGCTTCCCGCTAGTGTTCATCTCCAGTTACATGGTGTTGGC
m5C	chr16:29746849(+)	BS-Seq (High)	Human	AC009133.3	rs1389047981	chr16:29746849..29746849	dbSNP153	Splice 1		CAAGCTCCTGGCCTCAAGAGATCCTCCTGCCTCAGCCTCCCAAAGTGCTGGGATTACAGGTGTGA	CAAGCTCCTGGCCTCAAGAGATCCTCCTGCCTAAGCCTCCCAAAGTGCTGGGATTACAGGTGTGA
m5C	chr16:29809696(+)	BS-Seq (High)	Human	MAZ,AC009133.5	rs34942081	chr16:29809695..29809696	dbSNP153	RBP 3 Splice 1 miRNA 4 circRNA 6		CGGCCACATGCAGACCCATCTGGGGGGGGCCGCCCCCCCTGTCCCGGGAGACGCCCCCCAGCCAC	CGGCCACATGCAGACCCATCTGGGGGGGGCCG_CCCCCCTGTCCCGGGAGACGCCCCCCAGCCAC
m5C	chr16:29809696(+)	BS-Seq (High)	Human	MAZ,AC009133.5	rs767766841	chr16:29809696..29809696	dbSNP153	RBP 3 Splice 1 miRNA 4 circRNA 6		CGGCCACATGCAGACCCATCTGGGGGGGGCCGCCCCCCCTGTCCCGGGAGACGCCCCCCAGCCAC	CGGCCACATGCAGACCCATCTGGGGGGGGCCGACCCCCCTGTCCCGGGAGACGCCCCCCAGCCAC
m5C	chr16:29809696(+)	BS-Seq (High)	Human	MAZ,AC009133.5	rs767766841	chr16:29809696..29809696	dbSNP153	RBP 3 Splice 1 miRNA 4 circRNA 6		CGGCCACATGCAGACCCATCTGGGGGGGGCCGCCCCCCCTGTCCCGGGAGACGCCCCCCAGCCAC	CGGCCACATGCAGACCCATCTGGGGGGGGCCGTCCCCCCTGTCCCGGGAGACGCCCCCCAGCCAC
m5C	chr16:29809700(+)	BS-Seq (High)	Human	MAZ,AC009133.5	rs1385266717	chr16:29809700..29809700	dbSNP153,HGVD	RBP 4 Splice 1 miRNA 4 circRNA 6		CACATGCAGACCCATCTGGGGGGGGCCGCCCCCCCTGTCCCGGGAGACGCCCCCCAGCCACAGCC	CACATGCAGACCCATCTGGGGGGGGCCGCCCCTCCTGTCCCGGGAGACGCCCCCCAGCCACAGCC
m5C	chr16:29809701(+)	BS-Seq (High)	Human	MAZ,AC009133.5	rs1017065319	chr16:29809701..29809701	dbSNP153	RBP 4 Splice 1 circRNA 6		ACATGCAGACCCATCTGGGGGGGGCCGCCCCCCCTGTCCCGGGAGACGCCCCCCAGCCACAGCCC	ACATGCAGACCCATCTGGGGGGGGCCGCCCCCTCTGTCCCGGGAGACGCCCCCCAGCCACAGCCC
m5C	chr16:29810107(+)	BS-Seq (High)	Human	MAZ,AC009133.5	rs1215813000	chr16:29810098..29810107	dbSNP153	RBP 16 Splice 11 circRNA 1		AGGTACTGGTGAGGTTTGTCCAATGGCGGCGGCAGCGGCAGCGGCGGCAGCGGCAGCAGCGGCAG	AGGTACTGGTGAGGTTTGTCCAAT_________AGCGGCAGCGGCGGCAGCGGCAGCAGCGGCAG
m5C	chr16:29810104(+)	BS-Seq (High)	Human	MAZ,AC009133.5	rs750443159	chr16:29810098..29810104	dbSNP153	RBP 15 Splice 11 circRNA 1		TGCAGGTACTGGTGAGGTTTGTCCAATGGCGGCGGCAGCGGCAGCGGCGGCAGCGGCAGCAGCGG	TGCAGGTACTGGTGAGGTTTGTCCAAT______GGCAGCGGCAGCGGCGGCAGCGGCAGCAGCGG
m5C	chr16:29810119(+)	BS-Seq (High)	Human	MAZ,AC009133.5	rs780528070	chr16:29810098..29810119	dbSNP153	RBP 8 Splice 13 circRNA 1		GGTTTGTCCAATGGCGGCGGCAGCGGCAGCGGCGGCAGCGGCAGCAGCGGCAGCAGTAGCAGCCC	GGTTTGTCCAAT_____________________GGCAGCGGCAGCAGCGGCAGCAGTAGCAGCCC
m5C	chr16:29810113(+)	BS-Seq (High)	Human	MAZ,AC009133.5	rs530039776	chr16:29810099..29810114	dbSNP153	RBP 11 Splice 12 circRNA 1		TGGTGAGGTTTGTCCAATGGCGGCGGCAGCGGCAGCGGCGGCAGCGGCAGCAGCGGCAGCAGTAG	TGGTGAGGTTTGTCCAATG_______________GCGGCGGCAGCGGCAGCAGCGGCAGCAGTAG
m5C	chr16:29810107(+)	BS-Seq (High)	Human	MAZ,AC009133.5	rs748595015	chr16:29810099..29810108	dbSNP153	RBP 16 Splice 11 circRNA 1		AGGTACTGGTGAGGTTTGTCCAATGGCGGCGGCAGCGGCAGCGGCGGCAGCGGCAGCAGCGGCAG	AGGTACTGGTGAGGTTTGTCCAATG_________GCGGCAGCGGCGGCAGCGGCAGCAGCGGCAG
m5C	chr16:29810122(+)	BS-Seq (High)	Human	MAZ,AC009133.5	rs772983529	chr16:29810099..29810123	dbSNP153	RBP 8 Splice 13 circRNA 1		TTGTCCAATGGCGGCGGCAGCGGCAGCGGCGGCAGCGGCAGCAGCGGCAGCAGTAGCAGCCCCTC	TTGTCCAATG________________________GCGGCAGCAGCGGCAGCAGTAGCAGCCCCTC
m5C	chr16:29810113(+)	BS-Seq (High)	Human	MAZ,AC009133.5	rs370462022	chr16:29810102..29810114	dbSNP153	RBP 11 Splice 12 circRNA 1		TGGTGAGGTTTGTCCAATGGCGGCGGCAGCGGCAGCGGCGGCAGCGGCAGCAGCGGCAGCAGTAG	TGGTGAGGTTTGTCCAATGGCG____________GCGGCGGCAGCGGCAGCAGCGGCAGCAGTAG
m5C	chr16:29810113(+)	BS-Seq (High)	Human	MAZ,AC009133.5	rs370462022	chr16:29810102..29810114	dbSNP153	RBP 11 Splice 12 circRNA 1		TGGTGAGGTTTGTCCAATGGCGGCGGCAGCGGCAGCGGCGGCAGCGGCAGCAGCGGCAGCAGTAG	TGGTGAGGTTTGTCCAATGGCGGCGGCA______GCGGCGGCAGCGGCAGCAGCGGCAGCAGTAG
m5C	chr16:29810122(+)	BS-Seq (High)	Human	MAZ,AC009133.5	rs1405571648	chr16:29810102..29810123	dbSNP153	RBP 8 Splice 13 circRNA 1		TTGTCCAATGGCGGCGGCAGCGGCAGCGGCGGCAGCGGCAGCAGCGGCAGCAGTAGCAGCCCCTC	TTGTCCAATGGCG_____________________GCGGCAGCAGCGGCAGCAGTAGCAGCCCCTC
m5C	chr16:29810104(+)	BS-Seq (High)	Human	MAZ,AC009133.5	rs746270470	chr16:29810104..29810104	dbSNP153	RBP 15 Splice 11 circRNA 1		TGCAGGTACTGGTGAGGTTTGTCCAATGGCGGCGGCAGCGGCAGCGGCGGCAGCGGCAGCAGCGG	TGCAGGTACTGGTGAGGTTTGTCCAATGGCGGTGGCAGCGGCAGCGGCGGCAGCGGCAGCAGCGG
m5C	chr16:29810128(+)	BS-Seq (High)	Human	MAZ,AC009133.5	rs750704529	chr16:29810105..29810129	dbSNP153	RBP 7 Splice 15 circRNA 1		AATGGCGGCGGCAGCGGCAGCGGCGGCAGCGGCAGCAGCGGCAGCAGTAGCAGCCCCTCCCACAG	AATGGCGGCG________________________GCAGCGGCAGCAGTAGCAGCCCCTCCCACAG
m5C	chr16:29810113(+)	BS-Seq (High)	Human	MAZ,AC009133.5	rs760562143	chr16:29810105..29810114	dbSNP153,HGVD	RBP 11 Splice 12 circRNA 1		TGGTGAGGTTTGTCCAATGGCGGCGGCAGCGGCAGCGGCGGCAGCGGCAGCAGCGGCAGCAGTAG	TGGTGAGGTTTGTCCAATGGCGGCG_________GCGGCGGCAGCGGCAGCAGCGGCAGCAGTAG
m5C	chr16:29810116(+)	BS-Seq (High)	Human	MAZ,AC009133.5	rs1555501536	chr16:29810108..29810117	dbSNP153	RBP 8 Splice 13 circRNA 1		TGAGGTTTGTCCAATGGCGGCGGCAGCGGCAGCGGCGGCAGCGGCAGCAGCGGCAGCAGTAGCAG	TGAGGTTTGTCCAATGGCGGCGGCA_________GCGGCAGCGGCAGCAGCGGCAGCAGTAGCAG
m5C	chr16:29810110(+)	BS-Seq (High)	Human	MAZ,AC009133.5	rs1432128240	chr16:29810110..29810110	dbSNP153	RBP 15 Splice 12 circRNA 1		TACTGGTGAGGTTTGTCCAATGGCGGCGGCAGCGGCAGCGGCGGCAGCGGCAGCAGCGGCAGCAG	TACTGGTGAGGTTTGTCCAATGGCGGCGGCAGGGGCAGCGGCGGCAGCGGCAGCAGCGGCAGCAG
m5C	chr16:29810110(+)	BS-Seq (High)	Human	MAZ,AC009133.5	rs1432128240	chr16:29810110..29810110	dbSNP153	RBP 15 Splice 12 circRNA 1		TACTGGTGAGGTTTGTCCAATGGCGGCGGCAGCGGCAGCGGCGGCAGCGGCAGCAGCGGCAGCAG	TACTGGTGAGGTTTGTCCAATGGCGGCGGCAGTGGCAGCGGCGGCAGCGGCAGCAGCGGCAGCAG
m5C	chr16:29810128(+)	BS-Seq (High)	Human	MAZ,AC009133.5	rs1555501540	chr16:29810111..29810129	dbSNP153	RBP 7 Splice 15 circRNA 1		AATGGCGGCGGCAGCGGCAGCGGCGGCAGCGGCAGCAGCGGCAGCAGTAGCAGCCCCTCCCACAG	AATGGCGGCGGCAGCG__________________GCAGCGGCAGCAGTAGCAGCCCCTCCCACAG
m5C	chr16:29810113(+)	BS-Seq (High)	Human	MAZ,AC009133.5	rs1555501541	chr16:29810113..29810113	dbSNP153	RBP 11 Splice 12 circRNA 1		TGGTGAGGTTTGTCCAATGGCGGCGGCAGCGGCAGCGGCGGCAGCGGCAGCAGCGGCAGCAGTAG	TGGTGAGGTTTGTCCAATGGCGGCGGCAGCGGTAGCGGCGGCAGCGGCAGCAGCGGCAGCAGTAG
m5C	chr16:29810119(+)	BS-Seq (High)	Human	MAZ,AC009133.5	rs374878500	chr16:29810114..29810120	dbSNP153	RBP 8 Splice 13 circRNA 1		GGTTTGTCCAATGGCGGCGGCAGCGGCAGCGGCGGCAGCGGCAGCAGCGGCAGCAGTAGCAGCCC	GGTTTGTCCAATGGCGGCGGCAGCGGCA______GCAGCGGCAGCAGCGGCAGCAGTAGCAGCCC
m5C	chr16:29810119(+)	BS-Seq (High)	Human	MAZ,AC009133.5	rs374878500	chr16:29810114..29810120	dbSNP153	RBP 8 Splice 13 circRNA 1		GGTTTGTCCAATGGCGGCGGCAGCGGCAGCGGCGGCAGCGGCAGCAGCGGCAGCAGTAGCAGCCC	GGTTTGTCCAATGGCGGCGGCAGCGGCAGCG___GCAGCGGCAGCAGCGGCAGCAGTAGCAGCCC
m5C	chr16:29810116(+)	BS-Seq (High)	Human	MAZ,AC009133.5	rs776150016	chr16:29810116..29810116	dbSNP153	RBP 8 Splice 13 circRNA 1		TGAGGTTTGTCCAATGGCGGCGGCAGCGGCAGCGGCGGCAGCGGCAGCAGCGGCAGCAGTAGCAG	TGAGGTTTGTCCAATGGCGGCGGCAGCGGCAGTGGCGGCAGCGGCAGCAGCGGCAGCAGTAGCAG
m5C	chr16:29810122(+)	BS-Seq (High)	Human	MAZ,AC009133.5	rs760377330	chr16:29810117..29810123	dbSNP153	RBP 8 Splice 13 circRNA 1		TTGTCCAATGGCGGCGGCAGCGGCAGCGGCGGCAGCGGCAGCAGCGGCAGCAGTAGCAGCCCCTC	TTGTCCAATGGCGGCGGCAGCGGCAGCG______GCGGCAGCAGCGGCAGCAGTAGCAGCCCCTC
m5C	chr16:29810131(+)	BS-Seq (High)	Human	MAZ,AC009133.5	rs767330698	chr16:29810117..29810132	dbSNP153	RBP 6 Splice 15 circRNA 1		GGCGGCGGCAGCGGCAGCGGCGGCAGCGGCAGCAGCGGCAGCAGTAGCAGCCCCTCCCACAGCTG	GGCGGCGGCAGCGGCAGCG_______________GCGGCAGCAGTAGCAGCCCCTCCCACAGCTG
m5C	chr16:29810119(+)	BS-Seq (High)	Human	MAZ,AC009133.5	rs1555501552	chr16:29810118..29810119	dbSNP153	RBP 8 Splice 13 circRNA 1		GGTTTGTCCAATGGCGGCGGCAGCGGCAGCGGCGGCAGCGGCAGCAGCGGCAGCAGTAGCAGCCC	GGTTTGTCCAATGGCGGCGGCAGCGGCAGCGG_GGCAGCGGCAGCAGCGGCAGCAGTAGCAGCCC
m5C	chr16:29810119(+)	BS-Seq (High)	Human	MAZ,AC009133.5	rs760738918	chr16:29810119..29810119	dbSNP153	RBP 8 Splice 13 circRNA 1		GGTTTGTCCAATGGCGGCGGCAGCGGCAGCGGCGGCAGCGGCAGCAGCGGCAGCAGTAGCAGCCC	GGTTTGTCCAATGGCGGCGGCAGCGGCAGCGGTGGCAGCGGCAGCAGCGGCAGCAGTAGCAGCCC
m5C	chr16:29810137(+)	BS-Seq (High)	Human	MAZ,AC009133.5	rs753879391	chr16:29810120..29810138	dbSNP153	RBP 4 Splice 15 miRNA 2 circRNA 1		GGCAGCGGCAGCGGCGGCAGCGGCAGCAGCGGCAGCAGTAGCAGCCCCTCCCACAGCTGTGGGCT	GGCAGCGGCAGCGGCG__________________GCAGTAGCAGCCCCTCCCACAGCTGTGGGCT
m5C	chr16:29810137(+)	BS-Seq (High)	Human	MAZ,AC009133.5	rs753879391	chr16:29810120..29810138	dbSNP153	RBP 4 Splice 15 miRNA 2 circRNA 1		GGCAGCGGCAGCGGCGGCAGCGGCAGCAGCGGCAGCAGTAGCAGCCCCTCCCACAGCTGTGGGCT	GGCAGCGGCAGCGGCGGCAGCGGCA_________GCAGTAGCAGCCCCTCCCACAGCTGTGGGCT
m5C	chr16:29810125(+)	BS-Seq (High)	Human	MAZ,AC009133.5	rs1004648374	chr16:29810125..29810125	dbSNP153	RBP 8 Splice 13 circRNA 1		TCCAATGGCGGCGGCAGCGGCAGCGGCGGCAGCGGCAGCAGCGGCAGCAGTAGCAGCCCCTCCCA	TCCAATGGCGGCGGCAGCGGCAGCGGCGGCAGGGGCAGCAGCGGCAGCAGTAGCAGCCCCTCCCA
m5C	chr16:29810125(+)	BS-Seq (High)	Human	MAZ,AC009133.5	rs1004648374	chr16:29810125..29810125	dbSNP153	RBP 8 Splice 13 circRNA 1		TCCAATGGCGGCGGCAGCGGCAGCGGCGGCAGCGGCAGCAGCGGCAGCAGTAGCAGCCCCTCCCA	TCCAATGGCGGCGGCAGCGGCAGCGGCGGCAGTGGCAGCAGCGGCAGCAGTAGCAGCCCCTCCCA
m5C	chr16:29810131(+)	BS-Seq (High)	Human	MAZ,AC009133.5	rs753188781	chr16:29810126..29810132	dbSNP153	RBP 6 Splice 15 circRNA 1		GGCGGCGGCAGCGGCAGCGGCGGCAGCGGCAGCAGCGGCAGCAGTAGCAGCCCCTCCCACAGCTG	GGCGGCGGCAGCGGCAGCGGCGGCAGCG______GCGGCAGCAGTAGCAGCCCCTCCCACAGCTG
m5C	chr16:29810128(+)	BS-Seq (High)	Human	MAZ,AC009133.5	rs775555489	chr16:29810128..29810128	dbSNP153	RBP 7 Splice 15 circRNA 1		AATGGCGGCGGCAGCGGCAGCGGCGGCAGCGGCAGCAGCGGCAGCAGTAGCAGCCCCTCCCACAG	AATGGCGGCGGCAGCGGCAGCGGCGGCAGCGGTAGCAGCGGCAGCAGTAGCAGCCCCTCCCACAG
m5C	chr16:29810131(+)	BS-Seq (High)	Human	MAZ,AC009133.5	rs376973791	chr16:29810131..29810131	dbSNP153	RBP 6 Splice 15 circRNA 1		GGCGGCGGCAGCGGCAGCGGCGGCAGCGGCAGCAGCGGCAGCAGTAGCAGCCCCTCCCACAGCTG	GGCGGCGGCAGCGGCAGCGGCGGCAGCGGCAGTAGCGGCAGCAGTAGCAGCCCCTCCCACAGCTG
m5C	chr16:29810134(+)	BS-Seq (High)	Human	MAZ,AC009133.5	rs957294195	chr16:29810134..29810134	dbSNP153	RBP 5 Splice 15 miRNA 2 circRNA 1		GGCGGCAGCGGCAGCGGCGGCAGCGGCAGCAGCGGCAGCAGTAGCAGCCCCTCCCACAGCTGTGG	GGCGGCAGCGGCAGCGGCGGCAGCGGCAGCAGTGGCAGCAGTAGCAGCCCCTCCCACAGCTGTGG
m5C	chr16:29810290(+)	BS-Seq (High)	Human	MAZ,AC009133.5	rs538935150	chr16:29810290..29810290	dbSNP153	RBP 24 miRNA 4		GGAGAATGGAGTAGAGTCCCTTGGTACAAGCTCCTCTCCCCCCTCTTTTCCCACCAACTCCTATT	GGAGAATGGAGTAGAGTCCCTTGGTACAAGCTGCTCTCCCCCCTCTTTTCCCACCAACTCCTATT
m5C	chr16:29810290(+)	BS-Seq (High)	Human	MAZ,AC009133.5	rs538935150	chr16:29810290..29810290	dbSNP153	RBP 24 miRNA 4		GGAGAATGGAGTAGAGTCCCTTGGTACAAGCTCCTCTCCCCCCTCTTTTCCCACCAACTCCTATT	GGAGAATGGAGTAGAGTCCCTTGGTACAAGCTTCTCTCCCCCCTCTTTTCCCACCAACTCCTATT
m5C	chr16:2152304(-)	BS-Seq (High)	Human	SNHG19,SNHG19:2	rs749742617	chr16:2152304..2152304	dbSNP153			GCACAGTCTTGGCTCACTGCAACCTCAGTCTCCTGAGTAGCTGGGATTACAGGTGTGTGCCAAAA	GCACAGTCTTGGCTCACTGCAACCTCAGTCTCTTGAGTAGCTGGGATTACAGGTGTGTGCCAAAA
m5C	chr16:2152305(-)	BS-Seq (High)	Human	SNHG19,SNHG19:2	rs1175179405	chr16:2152305..2152305	dbSNP153			AGCACAGTCTTGGCTCACTGCAACCTCAGTCTCCTGAGTAGCTGGGATTACAGGTGTGTGCCAAA	AGCACAGTCTTGGCTCACTGCAACCTCAGTCTGCTGAGTAGCTGGGATTACAGGTGTGTGCCAAA
m5C	chr16:2154414(-)	BS-Seq (High)	Human	SNHG19,SNHG19:2	rs1039933600	chr16:2154414..2154414	dbSNP153			CTGACCTCAGGTGATCTGCCCACCTCAGCCTCCCAAAGTGCTGGGATCACAGGTGTGAGCCACCA	CTGACCTCAGGTGATCTGCCCACCTCAGCCTCTCAAAGTGCTGGGATCACAGGTGTGAGCCACCA
m5C	chr16:3485037(+)	BS-Seq (High)	Human	NAA60,AC004224.2	rs1216374011	chr16:3485037..3485037	dbSNP153	RBP 4 Splice 9 circRNA 2		CACGGGCTCGGGAACAGAACATCGTGGGCATGCGCAGAGCATGCCCATCCGTGGCAGGTACGCCA	CACGGGCTCGGGAACAGAACATCGTGGGCATGTGCAGAGCATGCCCATCCGTGGCAGGTACGCCA
m5C	chr16:3485583(+)	BS-Seq (High)	Human	NAA60,AC004224.2	rs1319790608	chr16:3485583..3485583	dbSNP153	RBP 3		TGACCCAGTGTGGCTGCATTCACTGGGAGGGGCCTGCCCTCACTGGGCCTCTCCCACTCCGCTGC	TGACCCAGTGTGGCTGCATTCACTGGGAGGGGACTGCCCTCACTGGGCCTCTCCCACTCCGCTGC
m5C	chr16:3485603(+)	BS-Seq (High)	Human	NAA60,AC004224.2	rs899911338	chr16:3485603..3485603	dbSNP153	RBP 2 miRNA 2		CACTGGGAGGGGCCTGCCCTCACTGGGCCTCTCCCACTCCGCTGCCTGTTCTTGCAGCTCCTTCC	CACTGGGAGGGGCCTGCCCTCACTGGGCCTCTTCCACTCCGCTGCCTGTTCTTGCAGCTCCTTCC
m5C	chr16:4783992(-)	BS-Seq (High)	Human	SEPTIN12,AC020663.5	rs569599063	chr16:4783992..4783992	dbSNP153	Splice 5		ACCTGCAGGAGGAGATCCTCATCACCCGCCAGCGCCACATCCCAGACACCCGGGTGCACTGCTGC	ACCTGCAGGAGGAGATCCTCATCACCCGCCAGTGCCACATCCCAGACACCCGGGTGCACTGCTGC
m5C	chr16:4783992(-)	BS-Seq (High)	Human	SEPTIN12,AC020663.5	rs569599063	chr16:4783992..4783992	dbSNP153	Splice 5		ACCTGCAGGAGGAGATCCTCATCACCCGCCAGCGCCACATCCCAGACACCCGGGTGCACTGCTGC	ACCTGCAGGAGGAGATCCTCATCACCCGCCAGGGCCACATCCCAGACACCCGGGTGCACTGCTGC
m5C	chr16:9106173(+)	BS-Seq (High)	Human	C16orf72,AC087190.3	rs1192873365	chr16:9106173..9106173	dbSNP153	RBP 3		GCTCACACCTATAATGCCGGCACTTTGGGAGGCCAAGGTGGGTGGATCACTTGAGGTCAGGAGTT	GCTCACACCTATAATGCCGGCACTTTGGGAGGACAAGGTGGGTGGATCACTTGAGGTCAGGAGTT
m5C	chr16:9106173(+)	BS-Seq (High)	Human	C16orf72,AC087190.3	rs1192873365	chr16:9106173..9106173	dbSNP153	RBP 3		GCTCACACCTATAATGCCGGCACTTTGGGAGGCCAAGGTGGGTGGATCACTTGAGGTCAGGAGTT	GCTCACACCTATAATGCCGGCACTTTGGGAGGTCAAGGTGGGTGGATCACTTGAGGTCAGGAGTT
m5C	chr16:13562789(+)	BS-Seq (High)	Human	U91319.1	rs1387284164	chr16:13562789..13562789	dbSNP153	Splice 4		GACTCACAGGCTACGGAGAAGAAAGGCTAAATCCACCAGACTGTTGGATGCACCTAAAACAAATT	GACTCACAGGCTACGGAGAAGAAAGGCTAAATTCACCAGACTGTTGGATGCACCTAAAACAAATT
m5C	chr16:75555827(-)	BS-Seq (High)	Human	AC025287.1,TMEM231	rs1342931755	chr16:75555827..75555827	dbSNP153	RBP 3 Splice 8 circRNA 2		CGTTCCCCGCCTTCAACCGGCTGCAAGGGGATCGCCTGCGCGTCCCGCTCGTTTCGGTGCGTGGT	CGTTCCCCGCCTTCAACCGGCTGCAAGGGGATGGCCTGCGCGTCCCGCTCGTTTCGGTGCGTGGT
m5C	chr16:75555827(-)	BS-Seq (High)	Human	AC025287.1,TMEM231	rs1342931755	chr16:75555827..75555827	dbSNP153	RBP 3 Splice 8 circRNA 2		CGTTCCCCGCCTTCAACCGGCTGCAAGGGGATCGCCTGCGCGTCCCGCTCGTTTCGGTGCGTGGT	CGTTCCCCGCCTTCAACCGGCTGCAAGGGGATAGCCTGCGCGTCCCGCTCGTTTCGGTGCGTGGT
m5C	chr16:75556164(-)	BS-Seq (High)	Human	AC025287.1,TMEM231	rs1465828368	chr16:75556164..75556164	dbSNP153	RBP 2 Splice 5 circRNA 2		AGCTCTTCTCTCACCCGGTCGAGCGCAGTTACCGCGCGGGGCTCTGCTCCAAAGCCGCGCTGTTC	AGCTCTTCTCTCACCCGGTCGAGCGCAGTTACTGCGCGGGGCTCTGCTCCAAAGCCGCGCTGTTC
m5C	chr16:75556164(-)	BS-Seq (High)	Human	AC025287.1,TMEM231	rs1465828368	chr16:75556164..75556164	dbSNP153	RBP 2 Splice 5 circRNA 2		AGCTCTTCTCTCACCCGGTCGAGCGCAGTTACCGCGCGGGGCTCTGCTCCAAAGCCGCGCTGTTC	AGCTCTTCTCTCACCCGGTCGAGCGCAGTTACAGCGCGGGGCTCTGCTCCAAAGCCGCGCTGTTC
m5C	chr16:81030932(+)	BS-Seq (High)	Human	CENPN,AC092718.4	rs941401266	chr16:81030932..81030932	dbSNP153	circRNA 6		TTAGCTGGGCCTGGTGGTGTGCACCTGTAATCCCAGCTACTTAGGAGGCTGAGGCAGGAGAATCG	TTAGCTGGGCCTGGTGGTGTGCACCTGTAATCTCAGCTACTTAGGAGGCTGAGGCAGGAGAATCG
m5C	chr16:84460657(-)	BS-Seq (High)	Human	ATP2C2-AS1	rs1567467317	chr16:84460656..84460657	dbSNP153	RBP 2		CTGAAGGCGTCTTTGTCAACGGGCTCTACCCCCAAGCTGCTCCGAACAAGACACAGACACTTTGA	CTGAAGGCGTCTTTGTCAACGGGCTCTACCCC_AAGCTGCTCCGAACAAGACACAGACACTTTGA
m5C	chr16:84460657(-)	BS-Seq (High)	Human	ATP2C2-AS1	rs373092570	chr16:84460657..84460657	dbSNP153	RBP 2		CTGAAGGCGTCTTTGTCAACGGGCTCTACCCCCAAGCTGCTCCGAACAAGACACAGACACTTTGA	CTGAAGGCGTCTTTGTCAACGGGCTCTACCCCTAAGCTGCTCCGAACAAGACACAGACACTTTGA
m5C	chr16:84460657(-)	BS-Seq (High)	Human	ATP2C2-AS1	rs373092570	chr16:84460657..84460657	dbSNP153	RBP 2		CTGAAGGCGTCTTTGTCAACGGGCTCTACCCCCAAGCTGCTCCGAACAAGACACAGACACTTTGA	CTGAAGGCGTCTTTGTCAACGGGCTCTACCCCGAAGCTGCTCCGAACAAGACACAGACACTTTGA
m5C	chr16:88737812(+)	BS-Seq (High)	Human	AC138028.2	rs4782315	chr16:88737812..88737812	dbSNP153			TCCCGAGCCTCATACCCCTTTGCCGCCTCCTTCCTCTGCAGAGACCAGCGTCTTGAGCCCAAACC	TCCCGAGCCTCATACCCCTTTGCCGCCTCCTTTCTCTGCAGAGACCAGCGTCTTGAGCCCAAACC
m5C	chr16:30887830(-)	BS-Seq (High)	Human	AC135048.2,BCL7C	rs746198772	chr16:30887830..30887830	dbSNP153	RBP 4 circRNA 4		AGCCGGCCTGCCTGTCCTGTTGCCCCAGGGGCCCCTTTGGCTTTTTACAAATAAAGACCCTTTTG	AGCCGGCCTGCCTGTCCTGTTGCCCCAGGGGCGCCTTTGGCTTTTTACAAATAAAGACCCTTTTG
m5C	chr16:30887956(-)	BS-Seq (High)	Human	AC135048.2,BCL7C	rs1362684462	chr16:30887956..30887956	dbSNP153	RBP 7 Splice 1 miRNA 2 circRNA 4		CCCCGAAGCTTACCCTGTCTTTGAGCCAGTGCCACCTGTCCCTGAGGCAGCCCAGGGTGACACAG	CCCCGAAGCTTACCCTGTCTTTGAGCCAGTGCTACCTGTCCCTGAGGCAGCCCAGGGTGACACAG
m5C	chr16:30887957(-)	BS-Seq (High)	Human	AC135048.2,BCL7C	rs1377378174	chr16:30887957..30887957	dbSNP153	RBP 7 Splice 1 miRNA 2 circRNA 4		CCCCCGAAGCTTACCCTGTCTTTGAGCCAGTGCCACCTGTCCCTGAGGCAGCCCAGGGTGACACA	CCCCCGAAGCTTACCCTGTCTTTGAGCCAGTGTCACCTGTCCCTGAGGCAGCCCAGGGTGACACA
m5C	chr16:30892610(-)	BS-Seq (High)	Human	AC135048.2,BCL7C	rs1402841557	chr16:30892610..30892610	dbSNP153	RBP 3 Splice 4		GACCCCCAGAAGGGGTCCCTGAGGAGGCTCAGCCCCCACGGCTGGGCCAAGAGAGAGGTAGGACC	GACCCCCAGAAGGGGTCCCTGAGGAGGCTCAGACCCCACGGCTGGGCCAAGAGAGAGGTAGGACC
m5C	chr16:30892613(-)	BS-Seq (High)	Human	AC135048.2,BCL7C	rs1308562267	chr16:30892613..30892613	dbSNP153	RBP 3 Splice 4		CCGGACCCCCAGAAGGGGTCCCTGAGGAGGCTCAGCCCCCACGGCTGGGCCAAGAGAGAGGTAGG	CCGGACCCCCAGAAGGGGTCCCTGAGGAGGCTTAGCCCCCACGGCTGGGCCAAGAGAGAGGTAGG
m5C	chr16:30949370(+)	m5C-RIP-seq (High)	Human	AC135048.1,ORAI3	rs1241239339	chr16:30949370..30949370	dbSNP153	RBP 3 circRNA 2		GAGGGCGAGAGCCCTGCAGGCTCGGCCACGTACCGGGAGTTCGTGCACCGCGGCTACCTGGACCT	GAGGGCGAGAGCCCTGCAGGCTCGGCCACGTAACGGGAGTTCGTGCACCGCGGCTACCTGGACCT
m5C	chr16:31457575(-)	BS-Seq (High)	Human	AC026471.1	rs1169035300	chr16:31457575..31457575	dbSNP153			GCCTGTAATCCCAGCTACTCGGGAGGCTGAGGCAGGAGACTCACTTGAACCCCGGGAGGCGGAGG	GCCTGTAATCCCAGCTACTCGGGAGGCTGAGGTAGGAGACTCACTTGAACCCCGGGAGGCGGAGG
m5C	chr16:31457742(-)	BS-Seq (High)	Human	AC026471.1	rs1022025272	chr16:31457742..31457742	dbSNP153	RBP 1		CAAGGAACCCCAGTCTGGGCTGGGCATGGTGGCTCATGCCTGTAATCCCAGCACTTTGGGAGGCC	CAAGGAACCCCAGTCTGGGCTGGGCATGGTGGTTCATGCCTGTAATCCCAGCACTTTGGGAGGCC
m5C	chr16:31459089(-)	BS-Seq (High)	Human	AC026471.1	rs1161660916	chr16:31459089..31459089	dbSNP153	RBP 4		TCGCTTCGCTGCCCCCCAGCGGTGGTGCGGCCCGGCCTTGGGACGGACTCCGAGAACCCCGAGCC	TCGCTTCGCTGCCCCCCAGCGGTGGTGCGGCCTGGCCTTGGGACGGACTCCGAGAACCCCGAGCC
m5C	chr16:64343616(-)	BS-Seq (High)	Human	AC012322.1	rs1254193228	chr16:64343616..64343616	dbSNP153	Splice 1		ACTCTGGCCACACCCCCCACTTCAGCCAGTTTCTTCTCAGCAGCCACTCCAGAGGGACCACCTCT	ACTCTGGCCACACCCCCCACTTCAGCCAGTTTATTCTCAGCAGCCACTCCAGAGGGACCACCTCT
m5C	chr16:66943941(+)	BS-Seq (High)	Human	AC009084.1,CES2	rs777532414	chr16:66943941..66943941	dbSNP153	RBP 5 circRNA 2		CTACAGCCTGCGGTGGGCCGGGCTCTGAAGGCCCACAGGCTCCAGTTCTGGAAGAAGGCGCTGCC	CTACAGCCTGCGGTGGGCCGGGCTCTGAAGGCACACAGGCTCCAGTTCTGGAAGAAGGCGCTGCC
m5C	chr16:66944035(+)	BS-Seq (High)	Human	AC009084.1,CES2	rs1175304642	chr16:66944035..66944035	dbSNP153	RBP 5 circRNA 2		AAGAGAGACACACAGAGCTGTAGCTCCCTGTGCCGGGGAGGAGGGGGTGGGTTCGCTGACAGGCG	AAGAGAGACACACAGAGCTGTAGCTCCCTGTGTCGGGGAGGAGGGGGTGGGTTCGCTGACAGGCG
m5C	chr16:68085629(+)	BS-Seq (High)	Human	AC130462.3,NFATC3	rs1181850926	chr16:68085614..68085630	dbSNP153	RBP 8		AAGCGGCGTTGAGGAGCTGCTGCCGCCGCTTGCCGCTGCCGCCGCCGCCGCCTGAGGAGGAGCTG	AAGCGGCGTTGAGGAGCT________________GCTGCCGCCGCCGCCGCCTGAGGAGGAGCTG
m5C	chr16:68085629(+)	BS-Seq (High)	Human	AC130462.3,NFATC3	rs921891648	chr16:68085629..68085629	dbSNP153	RBP 8		AAGCGGCGTTGAGGAGCTGCTGCCGCCGCTTGCCGCTGCCGCCGCCGCCGCCTGAGGAGGAGCTG	AAGCGGCGTTGAGGAGCTGCTGCCGCCGCTTGTCGCTGCCGCCGCCGCCGCCTGAGGAGGAGCTG
m5C	chr16:68085632(+)	BS-Seq (High)	Human	AC130462.3,NFATC3	rs1200537091	chr16:68085632..68085632	dbSNP153	RBP 7		CGGCGTTGAGGAGCTGCTGCCGCCGCTTGCCGCTGCCGCCGCCGCCGCCTGAGGAGGAGCTGCAG	CGGCGTTGAGGAGCTGCTGCCGCCGCTTGCCGTTGCCGCCGCCGCCGCCTGAGGAGGAGCTGCAG
m5C	chr16:68085635(+)	BS-Seq (High)	Human	AC130462.3,NFATC3	rs755187553	chr16:68085633..68085636	dbSNP153	RBP 7		CGTTGAGGAGCTGCTGCCGCCGCTTGCCGCTGCCGCCGCCGCCGCCTGAGGAGGAGCTGCAGCAC	CGTTGAGGAGCTGCTGCCGCCGCTTGCCGCT___GCCGCCGCCGCCTGAGGAGGAGCTGCAGCAC
m5C	chr16:68085635(+)	BS-Seq (High)	Human	AC130462.3,NFATC3	rs776856397	chr16:68085635..68085635	dbSNP153	RBP 7		CGTTGAGGAGCTGCTGCCGCCGCTTGCCGCTGCCGCCGCCGCCGCCTGAGGAGGAGCTGCAGCAC	CGTTGAGGAGCTGCTGCCGCCGCTTGCCGCTGACGCCGCCGCCGCCTGAGGAGGAGCTGCAGCAC
m5C	chr16:68085635(+)	BS-Seq (High)	Human	AC130462.3,NFATC3	rs776856397	chr16:68085635..68085635	dbSNP153	RBP 7		CGTTGAGGAGCTGCTGCCGCCGCTTGCCGCTGCCGCCGCCGCCGCCTGAGGAGGAGCTGCAGCAC	CGTTGAGGAGCTGCTGCCGCCGCTTGCCGCTGTCGCCGCCGCCGCCTGAGGAGGAGCTGCAGCAC
m5C	chr16:68085644(+)	BS-Seq (High)	Human	AC130462.3,NFATC3	rs1163459056	chr16:68085644..68085644	dbSNP153	RBP 8		GCTGCTGCCGCCGCTTGCCGCTGCCGCCGCCGCCGCCTGAGGAGGAGCTGCAGCACCCTGGGCCA	GCTGCTGCCGCCGCTTGCCGCTGCCGCCGCCGTCGCCTGAGGAGGAGCTGCAGCACCCTGGGCCA
m5C	chr16:68085659(+)	BS-Seq (High)	Human	AC130462.3,NFATC3	rs951154148	chr16:68085659..68085659	dbSNP153	RBP 9		TGCCGCTGCCGCCGCCGCCGCCTGAGGAGGAGCTGCAGCACCCTGGGCCACGCCGATGACTACTG	TGCCGCTGCCGCCGCCGCCGCCTGAGGAGGAGGTGCAGCACCCTGGGCCACGCCGATGACTACTG
m5C	chr16:68085659(+)	BS-Seq (High)	Human	AC130462.3,NFATC3	rs951154148	chr16:68085659..68085659	dbSNP153	RBP 9		TGCCGCTGCCGCCGCCGCCGCCTGAGGAGGAGCTGCAGCACCCTGGGCCACGCCGATGACTACTG	TGCCGCTGCCGCCGCCGCCGCCTGAGGAGGAGTTGCAGCACCCTGGGCCACGCCGATGACTACTG
m5C	chr16:29809696(+)	BS-Seq (High)	Human	MAZ,AC009133.5	rs34942081	chr16:29809695..29809696	TCGA,ICGC	RBP 3 Splice 1 miRNA 4 circRNA 6		CGGCCACATGCAGACCCATCTGGGGGGGGCCGCCCCCCCTGTCCCGGGAGACGCCCCCCAGCCAC	CGGCCACATGCAGACCCATCTGGGGGGGGCCG_CCCCCCTGTCCCGGGAGACGCCCCCCAGCCAC
m5C	chr16:29809699(+)	BS-Seq (High)	Human	MAZ,AC009133.5	-	chr16:29809699..29809699	COSMIC	RBP 4 Splice 1 miRNA 4 circRNA 6		CCACATGCAGACCCATCTGGGGGGGGCCGCCCCCCCTGTCCCGGGAGACGCCCCCCAGCCACAGC	CCACATGCAGACCCATCTGGGGGGGGCCGCCCTCCCTGTCCCGGGAGACGCCCCCCAGCCACAGC
m5C	chr16:19116084(+)	BS-Seq (High)	Human	ITPRIPL2,AC099518.3	-	chr16:19116084..19116084	TCGA,ICGC,COSMIC	RBP 1 miRNA 2 circRNA 4		CTTGAAGGTGAACCGTAAACCCTGACAGCACCCCCACCTGACCAAATGCTCCTAAAGCCTTTCCC	CTTGAAGGTGAACCGTAAACCCTGACAGCACCACCACCTGACCAAATGCTCCTAAAGCCTTTCCC
m5C	chr16:19118333(+)	BS-Seq (High)	Human	ITPRIPL2,AC099518.3	rs1417493358	chr16:19118333..19118333	TCGA,ICGC,COSMIC	circRNA 4		TAAAAAATACAAAAATTAGCTGGGCGTGGTGGCGGGCGCCTGTAATCCCAGATACTCGGGAGGCT	TAAAAAATACAAAAATTAGCTGGGCGTGGTGGTGGGCGCCTGTAATCCCAGATACTCGGGAGGCT
m5C	chr16:19115843(+)	BS-Seq (High)	Human	ITPRIPL2,AC099518.3	rs1459686603	chr16:19115843..19115843	ICGC	RBP 1 miRNA 6 circRNA 4		GCTCTTCCACTGCGTCCTGGGCCCTGGTGGGGCGGCTGCCGAGGTGGGTCCCCTGCCCAAGGCAC	GCTCTTCCACTGCGTCCTGGGCCCTGGTGGGGTGGCTGCCGAGGTGGGTCCCCTGCCCAAGGCAC
m5C	chr16:29810113(+)	BS-Seq (High)	Human	MAZ,AC009133.5	rs1555501541	chr16:29810113..29810113	TCGA,COSMIC	RBP 11 Splice 12 circRNA 1		TGGTGAGGTTTGTCCAATGGCGGCGGCAGCGGCAGCGGCGGCAGCGGCAGCAGCGGCAGCAGTAG	TGGTGAGGTTTGTCCAATGGCGGCGGCAGCGGTAGCGGCGGCAGCGGCAGCAGCGGCAGCAGTAG
m5C	chr16:29810116(+)	BS-Seq (High)	Human	MAZ,AC009133.5	rs776150016	chr16:29810116..29810116	COSMIC	RBP 8 Splice 13 circRNA 1		TGAGGTTTGTCCAATGGCGGCGGCAGCGGCAGCGGCGGCAGCGGCAGCAGCGGCAGCAGTAGCAG	TGAGGTTTGTCCAATGGCGGCGGCAGCGGCAGTGGCGGCAGCGGCAGCAGCGGCAGCAGTAGCAG
m5C	chr16:29809700(+)	BS-Seq (High)	Human	MAZ,AC009133.5	-	chr16:29809699..29809700	ICGC	RBP 4 Splice 1 miRNA 4 circRNA 6		CACATGCAGACCCATCTGGGGGGGGCCGCCCCCCCTGTCCCGGGAGACGCCCCCCAGCCACAGCC	CACATGCAGACCCATCTGGGGGGGGCCGCCCTTCCTGTCCCGGGAGACGCCCCCCAGCCACAGCC
m5C	chr16:29809699(+)	BS-Seq (High)	Human	MAZ,AC009133.5	-	chr16:29809699..29809700	ICGC	RBP 4 Splice 1 miRNA 4 circRNA 6		CCACATGCAGACCCATCTGGGGGGGGCCGCCCCCCCTGTCCCGGGAGACGCCCCCCAGCCACAGC	CCACATGCAGACCCATCTGGGGGGGGCCGCCCTTCCTGTCCCGGGAGACGCCCCCCAGCCACAGC
m5C	chr16:29810113(+)	BS-Seq (High)	Human	MAZ,AC009133.5	rs530039776	chr16:29810099..29810114	ICGC	RBP 11 Splice 12 circRNA 1		TGGTGAGGTTTGTCCAATGGCGGCGGCAGCGGCAGCGGCGGCAGCGGCAGCAGCGGCAGCAGTAG	TGGTGAGGTTTGTCCAATG_______________GCGGCGGCAGCGGCAGCAGCGGCAGCAGTAG
m5C	chr16:4783992(-)	BS-Seq (High)	Human	SEPTIN12,AC020663.5	rs569599063	chr16:4783992..4783992	COSMIC	Splice 5		ACCTGCAGGAGGAGATCCTCATCACCCGCCAGCGCCACATCCCAGACACCCGGGTGCACTGCTGC	ACCTGCAGGAGGAGATCCTCATCACCCGCCAGTGCCACATCCCAGACACCCGGGTGCACTGCTGC
m5C	chr16:29810116(+)	BS-Seq (High)	Human	MAZ,AC009133.5	rs1555501536	chr16:29810108..29810117	TCGA	RBP 8 Splice 13 circRNA 1		TGAGGTTTGTCCAATGGCGGCGGCAGCGGCAGCGGCGGCAGCGGCAGCAGCGGCAGCAGTAGCAG	TGAGGTTTGTCCAATGGCGGCGGCA_________GCGGCAGCGGCAGCAGCGGCAGCAGTAGCAG
m5C	chr16:3485601(+)	BS-Seq (High)	Human	NAA60,AC004224.2	-	chr16:3485601..3485601	ICGC	RBP 2 miRNA 2		TTCACTGGGAGGGGCCTGCCCTCACTGGGCCTCTCCCACTCCGCTGCCTGTTCTTGCAGCTCCTT	TTCACTGGGAGGGGCCTGCCCTCACTGGGCCTTTCCCACTCCGCTGCCTGTTCTTGCAGCTCCTT
m5C	chr16:29810104(+)	BS-Seq (High)	Human	MAZ,AC009133.5	rs750443159	chr16:29810098..29810104	ICGC	RBP 15 Splice 11 circRNA 1		TGCAGGTACTGGTGAGGTTTGTCCAATGGCGGCGGCAGCGGCAGCGGCGGCAGCGGCAGCAGCGG	TGCAGGTACTGGTGAGGTTTGTCCAAT______GGCAGCGGCAGCGGCGGCAGCGGCAGCAGCGG
m5C	chr16:83748141(-)	BS-Seq (High)	Human	AC009063.2	-	chr16:83748141..83748141	TCGA,ICGC			GTGTCAACAGTCCCATTGATGGGGTTAATATTCAGCCAACCTGCTGGGTCCTTGTAAACAGAATA	GTGTCAACAGTCCCATTGATGGGGTTAATATTTAGCCAACCTGCTGGGTCCTTGTAAACAGAATA
m5C	chr16:19116082(+)	BS-Seq (High)	Human	ITPRIPL2,AC099518.3	rs1348517181	chr16:19116082..19116082	ICGC	RBP 1 miRNA 1 circRNA 4		TCCTTGAAGGTGAACCGTAAACCCTGACAGCACCCCCACCTGACCAAATGCTCCTAAAGCCTTTC	TCCTTGAAGGTGAACCGTAAACCCTGACAGCATCCCCACCTGACCAAATGCTCCTAAAGCCTTTC
m5C	chr16:29810104(+)	BS-Seq (High)	Human	MAZ,AC009133.5	rs746270470	chr16:29810104..29810104	TCGA	RBP 15 Splice 11 circRNA 1		TGCAGGTACTGGTGAGGTTTGTCCAATGGCGGCGGCAGCGGCAGCGGCGGCAGCGGCAGCAGCGG	TGCAGGTACTGGTGAGGTTTGTCCAATGGCGGTGGCAGCGGCAGCGGCGGCAGCGGCAGCAGCGG
m5C	chr16:3485033(+)	BS-Seq (High)	Human	NAA60,AC004224.2	-	chr16:3485033..3485033	ICGC	RBP 4 Splice 9 circRNA 2		GCTACACGGGCTCGGGAACAGAACATCGTGGGCATGCGCAGAGCATGCCCATCCGTGGCAGGTAC	GCTACACGGGCTCGGGAACAGAACATCGTGGGTATGCGCAGAGCATGCCCATCCGTGGCAGGTAC
m5C	chr16:3485037(+)	BS-Seq (High)	Human	NAA60,AC004224.2	rs1216374011	chr16:3485037..3485037	ICGC	RBP 4 Splice 9 circRNA 2		CACGGGCTCGGGAACAGAACATCGTGGGCATGCGCAGAGCATGCCCATCCGTGGCAGGTACGCCA	CACGGGCTCGGGAACAGAACATCGTGGGCATGTGCAGAGCATGCCCATCCGTGGCAGGTACGCCA
m5C	chr16:29810128(+)	BS-Seq (High)	Human	MAZ,AC009133.5	-	chr16:29810120..29810129	TCGA	RBP 7 Splice 15 circRNA 1		AATGGCGGCGGCAGCGGCAGCGGCGGCAGCGGCAGCAGCGGCAGCAGTAGCAGCCCCTCCCACAG	AATGGCGGCGGCAGCGGCAGCGGCG_________GCAGCGGCAGCAGTAGCAGCCCCTCCCACAG
m5C	chr17:16441614(+)	BS-Seq (High)	Human	SNHG29	rs1292238060	chr17:16441614..16441614	dbSNP153	RBP 24 miRNA 6 circRNA 4		TTTTTTTTTTTTGAGACAGTCTTGCTGTATTGCCCAGGCTGGAGTGTGGTGGCACAATCACAGCT	TTTTTTTTTTTTGAGACAGTCTTGCTGTATTGTCCAGGCTGGAGTGTGGTGGCACAATCACAGCT
m5C	chr17:16441615(+)	BS-Seq (High)	Human	SNHG29	rs1158112040	chr17:16441615..16441615	dbSNP153	RBP 24 miRNA 6 circRNA 4		TTTTTTTTTTTGAGACAGTCTTGCTGTATTGCCCAGGCTGGAGTGTGGTGGCACAATCACAGCTC	TTTTTTTTTTTGAGACAGTCTTGCTGTATTGCTCAGGCTGGAGTGTGGTGGCACAATCACAGCTC
m5C	chr17:16460899(+)	BS-Seq (High)	Human	SNHG29	rs1286123421	chr17:16460899..16460899	dbSNP153	RBP 4 Splice 1		ACTCCCGTCCCTTCCCACCTCCCTAGGCAGAACCGGGTGGAACTGCATGAGAAGCGACGGAGGCG	ACTCCCGTCCCTTCCCACCTCCCTAGGCAGAAGCGGGTGGAACTGCATGAGAAGCGACGGAGGCG
m5C	chr17:18149305(-)	BS-Seq (High)	Human	lnc-TOP3A-1	rs1302652375	chr17:18149305..18149305	dbSNP153			CATTTGTACCGTCCTGATTGTGGCTGCTGTACCCATCAGAGTCAAGTACTTTGGGCATGTGCTCC	CATTTGTACCGTCCTGATTGTGGCTGCTGTACTCATCAGAGTCAAGTACTTTGGGCATGTGCTCC
m5C	chr17:18155421(-)	BS-Seq (High)	Human	lnc-TOP3A-1	rs776829342	chr17:18155421..18155421	dbSNP153			CACTTCACCCCTGCTGGTCACCTGTATGCACGCAGGACCCGCAGCTGCCCGCCGGCCTCCTGGCC	CACTTCACCCCTGCTGGTCACCTGTATGCACGTAGGACCCGCAGCTGCCCGCCGGCCTCCTGGCC
m5C	chr17:20237862(+)	BS-Seq (High)	Human	SPECC1,AC004702.1	rs1426510384	chr17:20237862..20237862	dbSNP153	RBP 1 circRNA 17		CTTCCTGGGTTTAAGCTATTCTCCTGCCTTGGCCTCCCAAGTAGCTGGGATTACAGGCATGTGCC	CTTCCTGGGTTTAAGCTATTCTCCTGCCTTGGTCTCCCAAGTAGCTGGGATTACAGGCATGTGCC
m5C	chr17:20237865(+)	BS-Seq (High)	Human	SPECC1,AC004702.1	rs1479725486	chr17:20237865..20237865	dbSNP153	RBP 1 circRNA 17		CCTGGGTTTAAGCTATTCTCCTGCCTTGGCCTCCCAAGTAGCTGGGATTACAGGCATGTGCCGTC	CCTGGGTTTAAGCTATTCTCCTGCCTTGGCCTTCCAAGTAGCTGGGATTACAGGCATGTGCCGTC
m5C	chr17:28372352(+)	BS-Seq (High)	Human	AC002094.1,SARM1	rs1555584180	chr17:28372352..28372352	dbSNP153	RBP 1		CCAACTGGTGGAGGAGGCCTGGCTGCTGCCGGCCGTGGGCCGCGAGGTAGCCCAGGGTCTGTGCG	CCAACTGGTGGAGGAGGCCTGGCTGCTGCCGGTCGTGGGCCGCGAGGTAGCCCAGGGTCTGTGCG
m5C	chr17:29390682(+)	BS-Seq (High)	Human	MIR4523,AC068025.2,TAOK1	rs1448548058	chr17:29390682..29390682	dbSNP153	RBP 9 miRNA 2		CGAGGGGCCGCGGCGGGGGACCGAGAGGGCCTCGGCTGTGTGAGGACTAGAGGCGGCCGAGGCCC	CGAGGGGCCGCGGCGGGGGACCGAGAGGGCCTGGGCTGTGTGAGGACTAGAGGCGGCCGAGGCCC
m5C	chr17:29568505(+)	BS-Seq (High)	Human	TP53I13,ABHD15-AS1	rs1420521648	chr17:29568505..29568505	dbSNP153	Splice 5 circRNA 1		CCCCGCCTGCCCTACTGAGCCTTGCGCGCTGACCCGGTTCCTACACTTAACTTTTCCGGCTTCGG	CCCCGCCTGCCCTACTGAGCCTTGCGCGCTGAACCGGTTCCTACACTTAACTTTTCCGGCTTCGG
m5C	chr17:29568505(+)	BS-Seq (High)	Human	TP53I13,ABHD15-AS1	rs1420521648	chr17:29568505..29568505	dbSNP153	Splice 5 circRNA 1		CCCCGCCTGCCCTACTGAGCCTTGCGCGCTGACCCGGTTCCTACACTTAACTTTTCCGGCTTCGG	CCCCGCCTGCCCTACTGAGCCTTGCGCGCTGAGCCGGTTCCTACACTTAACTTTTCCGGCTTCGG
m5C	chr17:29568738(+)	m5C-RIP-seq (High)	Human	TP53I13,ABHD15-AS1	rs747640838	chr17:29568738..29568738	dbSNP153	RBP 6 Splice 2 circRNA 1		CTCCCTCGCTGGCGGAGCGGCTGGGCGGCGGGCCGGGCCCGGGGCCGCTTGGAATGGCGCCTCCT	CTCCCTCGCTGGCGGAGCGGCTGGGCGGCGGGTCGGGCCCGGGGCCGCTTGGAATGGCGCCTCCT
m5C	chr17:29572569(+)	BS-Seq (High)	Human	TP53I13,ABHD15-AS1	rs1252222842	chr17:29572569..29572569	dbSNP153	RBP 1 miRNA 3 circRNA 2		CACCCCACGCACTGAAGAGGCCGCCTGGGCTGCCATGGCCCTGACCTTCCTGCTGGTGCTGCTCA	CACCCCACGCACTGAAGAGGCCGCCTGGGCTGACATGGCCCTGACCTTCCTGCTGGTGCTGCTCA
m5C	chr17:29593417(+)	BS-Seq (High)	Human	ABHD15-AS1,ANKRD13B	rs1303571280	chr17:29593417..29593417	dbSNP153			GGCGGGTGGGGGCCTCTCCGCGCCGCCCGCCGCCGCCGCCTCGCGAGGACGCCCGTCGCCCGCGC	GGCGGGTGGGGGCCTCTCCGCGCCGCCCGCCGACGCCGCCTCGCGAGGACGCCCGTCGCCCGCGC
m5C	chr17:29593475(+)	BS-Seq (High)	Human	ABHD15-AS1,ANKRD13B	rs977761324	chr17:29593475..29593475	dbSNP153			CCCGCGCCGCCCGCACCGCGCCGGGCGCGCCGCCCCCGCCCGCCGCCGCTCGCACATGCCCGAGC	CCCGCGCCGCCCGCACCGCGCCGGGCGCGCCGTCCCCGCCCGCCGCCGCTCGCACATGCCCGAGC
m5C	chr17:29593478(+)	BS-Seq (High)	Human	ABHD15-AS1,ANKRD13B	rs927631501	chr17:29593478..29593478	dbSNP153			GCGCCGCCCGCACCGCGCCGGGCGCGCCGCCCCCGCCCGCCGCCGCTCGCACATGCCCGAGCCGC	GCGCCGCCCGCACCGCGCCGGGCGCGCCGCCCTCGCCCGCCGCCGCTCGCACATGCCCGAGCCGC
m5C	chr17:29593482(+)	BS-Seq (High)	Human	ABHD15-AS1,ANKRD13B	rs1260780644	chr17:29593482..29593482	dbSNP153			CGCCCGCACCGCGCCGGGCGCGCCGCCCCCGCCCGCCGCCGCTCGCACATGCCCGAGCCGCAGCC	CGCCCGCACCGCGCCGGGCGCGCCGCCCCCGCTCGCCGCCGCTCGCACATGCCCGAGCCGCAGCC
m5C	chr17:29593485(+)	BS-Seq (High)	Human	ABHD15-AS1,ANKRD13B	rs1224582895	chr17:29593485..29593485	dbSNP153			CCGCACCGCGCCGGGCGCGCCGCCCCCGCCCGCCGCCGCTCGCACATGCCCGAGCCGCAGCCCCG	CCGCACCGCGCCGGGCGCGCCGCCCCCGCCCGTCGCCGCTCGCACATGCCCGAGCCGCAGCCCCG
m5C	chr17:29613415(+)	BS-Seq (High)	Human	ABHD15-AS1,ANKRD13B	rs1349134712	chr17:29613415..29613415	dbSNP153	RBP 2 Splice 5 circRNA 3		CTGCGCCCCCGGCGTCAGTGCCCAGCCCTCGGCCCAGCTCAGGGCCAGGTTCCGGCGGCCACGTG	CTGCGCCCCCGGCGTCAGTGCCCAGCCCTCGGACCAGCTCAGGGCCAGGTTCCGGCGGCCACGTG
m5C	chr17:29613416(+)	BS-Seq (High)	Human	ABHD15-AS1,ANKRD13B	rs1238479049	chr17:29613416..29613416	dbSNP153	RBP 2 Splice 5 circRNA 3		TGCGCCCCCGGCGTCAGTGCCCAGCCCTCGGCCCAGCTCAGGGCCAGGTTCCGGCGGCCACGTGT	TGCGCCCCCGGCGTCAGTGCCCAGCCCTCGGCGCAGCTCAGGGCCAGGTTCCGGCGGCCACGTGT
m5C	chr17:29613416(+)	BS-Seq (High)	Human	ABHD15-AS1,ANKRD13B	rs1238479049	chr17:29613416..29613416	dbSNP153	RBP 2 Splice 5 circRNA 3		TGCGCCCCCGGCGTCAGTGCCCAGCCCTCGGCCCAGCTCAGGGCCAGGTTCCGGCGGCCACGTGT	TGCGCCCCCGGCGTCAGTGCCCAGCCCTCGGCTCAGCTCAGGGCCAGGTTCCGGCGGCCACGTGT
m5C	chr17:47881534(-)	BS-Seq (High)	Human	AC018521.7	rs1043090929	chr17:47881534..47881534	dbSNP153			GTAGCTGGGACTACAGGCGCCCGCCACCACGCCCGGCTAATTTTTTGTATTTTTAGTAGAGACTG	GTAGCTGGGACTACAGGCGCCCGCCACCACGCTCGGCTAATTTTTTGTATTTTTAGTAGAGACTG
m5C	chr17:47881537(-)	BS-Seq (High)	Human	AC018521.7	rs7217147	chr17:47881537..47881537	dbSNP153		GWAS_ID_15985,GWAS_ID_15986,GWAS_ID_15987,GWAS_ID_15988,GWAS_ID_15989,GWAS_ID_15990,GWAS_ID_15991,GWAS_ID_15992,GWAS_ID_15993,GWAS_ID_15994,GWAS_ID_15995,GWAS_ID_15996,GWAS_ID_15997,GWAS_ID_15998,GWAS_ID_15999,GWAS_ID_16000,GWAS_ID_16001,GWAS_ID_16002,GWAS_ID_16003,GWAS_ID_16004	CGAGTAGCTGGGACTACAGGCGCCCGCCACCACGCCCGGCTAATTTTTTGTATTTTTAGTAGAGA	CGAGTAGCTGGGACTACAGGCGCCCGCCACCATGCCCGGCTAATTTTTTGTATTTTTAGTAGAGA
m5C	chr17:47881545(-)	BS-Seq (High)	Human	AC018521.7	rs938893359	chr17:47881545..47881545	dbSNP153			CAGCCTCCCGAGTAGCTGGGACTACAGGCGCCCGCCACCACGCCCGGCTAATTTTTTGTATTTTT	CAGCCTCCCGAGTAGCTGGGACTACAGGCGCCTGCCACCACGCCCGGCTAATTTTTTGTATTTTT
m5C	chr17:47881545(-)	BS-Seq (High)	Human	AC018521.7	rs938893359	chr17:47881545..47881545	dbSNP153			CAGCCTCCCGAGTAGCTGGGACTACAGGCGCCCGCCACCACGCCCGGCTAATTTTTTGTATTTTT	CAGCCTCCCGAGTAGCTGGGACTACAGGCGCCGGCCACCACGCCCGGCTAATTTTTTGTATTTTT
m5C	chr17:47881549(-)	BS-Seq (High)	Human	AC018521.7	rs192936754	chr17:47881549..47881549	dbSNP153			GCCTCAGCCTCCCGAGTAGCTGGGACTACAGGCGCCCGCCACCACGCCCGGCTAATTTTTTGTAT	GCCTCAGCCTCCCGAGTAGCTGGGACTACAGGTGCCCGCCACCACGCCCGGCTAATTTTTTGTAT
m5C	chr17:47881569(-)	BS-Seq (High)	Human	AC018521.7	rs892077298	chr17:47881569..47881569	dbSNP153			CGGGTTCACGCCATTCTCCTGCCTCAGCCTCCCGAGTAGCTGGGACTACAGGCGCCCGCCACCAC	CGGGTTCACGCCATTCTCCTGCCTCAGCCTCCTGAGTAGCTGGGACTACAGGCGCCCGCCACCAC
m5C	chr17:47881569(-)	BS-Seq (High)	Human	AC018521.7	rs892077298	chr17:47881569..47881569	dbSNP153			CGGGTTCACGCCATTCTCCTGCCTCAGCCTCCCGAGTAGCTGGGACTACAGGCGCCCGCCACCAC	CGGGTTCACGCCATTCTCCTGCCTCAGCCTCCGGAGTAGCTGGGACTACAGGCGCCCGCCACCAC
m5C	chr17:47881569(-)	BS-Seq (High)	Human	AC018521.7	rs892077298	chr17:47881569..47881569	dbSNP153			CGGGTTCACGCCATTCTCCTGCCTCAGCCTCCCGAGTAGCTGGGACTACAGGCGCCCGCCACCAC	CGGGTTCACGCCATTCTCCTGCCTCAGCCTCCAGAGTAGCTGGGACTACAGGCGCCCGCCACCAC
m5C	chr17:47881571(-)	BS-Seq (High)	Human	AC018521.7	rs1455788600	chr17:47881571..47881571	dbSNP153			CCCGGGTTCACGCCATTCTCCTGCCTCAGCCTCCCGAGTAGCTGGGACTACAGGCGCCCGCCACC	CCCGGGTTCACGCCATTCTCCTGCCTCAGCCTTCCGAGTAGCTGGGACTACAGGCGCCCGCCACC
m5C	chr17:47947607(+)	BS-Seq (High)	Human	AC018521.1,PNPO	rs2325749	chr17:47947607..47947607	dbSNP153	miRNA 1 circRNA 14	Clinvar_Rec_942	CTGGAGTGCAGTGGTGTGATCTTGGCTCACTGCAACCTCTGCCTCCCAGGTTCAAGCAATTCTCC	CTGGAGTGCAGTGGTGTGATCTTGGCTCACTGAAACCTCTGCCTCCCAGGTTCAAGCAATTCTCC
m5C	chr17:47947638(+)	BS-Seq (High)	Human	AC018521.1,PNPO	rs762474156	chr17:47947638..47947638	dbSNP153	circRNA 14		GCAACCTCTGCCTCCCAGGTTCAAGCAATTCTCCTGCCTCAGCCTCCCAAGTAGCTGGGACTACA	GCAACCTCTGCCTCCCAGGTTCAAGCAATTCTTCTGCCTCAGCCTCCCAAGTAGCTGGGACTACA
m5C	chr17:47947669(+)	BS-Seq (High)	Human	AC018521.1,PNPO	rs925187268	chr17:47947669..47947669	dbSNP153	circRNA 14		TCCTGCCTCAGCCTCCCAAGTAGCTGGGACTACAGGCACACGCCACCACACCCAACTAATTTTTG	TCCTGCCTCAGCCTCCCAAGTAGCTGGGACTATAGGCACACGCCACCACACCCAACTAATTTTTG
m5C	chr17:47947673(+)	BS-Seq (High)	Human	AC018521.1,PNPO	rs1331633245	chr17:47947673..47947673	dbSNP153	circRNA 14		GCCTCAGCCTCCCAAGTAGCTGGGACTACAGGCACACGCCACCACACCCAACTAATTTTTGTATT	GCCTCAGCCTCCCAAGTAGCTGGGACTACAGGTACACGCCACCACACCCAACTAATTTTTGTATT
m5C	chr17:47947736(+)	BS-Seq (High)	Human	AC018521.1,PNPO	rs1230741307	chr17:47947736..47947736	dbSNP153	RBP 1 circRNA 14		TTTTTAGTAGAGATGGGGTTTCACCATGTTGGCCAGGATTGTCTCCATCTCTTGACCTTGTGATC	TTTTTAGTAGAGATGGGGTTTCACCATGTTGGTCAGGATTGTCTCCATCTCTTGACCTTGTGATC
m5C	chr17:47947899(+)	BS-Seq (High)	Human	AC018521.1,PNPO	rs1244442996	chr17:47947899..47947899	dbSNP153	RBP 2 circRNA 14		CCTGACCTAAAGTGATCTGCCCGCCTTGGCCTCCCAAAGTGCTGGGATTACAGACATGAGCCACC	CCTGACCTAAAGTGATCTGCCCGCCTTGGCCTTCCAAAGTGCTGGGATTACAGACATGAGCCACC
m5C	chr17:47974726(+)	BS-Seq (High)	Human	AC018521.1,CDK5RAP3	rs186237369	chr17:47974726..47974726	dbSNP153	RBP 5 circRNA 12		TGTGGGTCCTCCACCACTCACCTCTTGGTTAGCGGGAGTGTGCTGCCCCCACCCCCACCCCCGCA	TGTGGGTCCTCCACCACTCACCTCTTGGTTAGTGGGAGTGTGCTGCCCCCACCCCCACCCCCGCA
m5C	chr17:47978852(+)	BS-Seq (High)	Human	AC018521.1,CDK5RAP3	rs1237095641	chr17:47978852..47978852	dbSNP153	RBP 9 Splice 21 miRNA 9 circRNA 7		TCCTGGCAGCTCCAGAAGGTGTTGCCAGGGGCCCAGATGCCCTGACACTGCTTGAATACACTGAG	TCCTGGCAGCTCCAGAAGGTGTTGCCAGGGGCTCAGATGCCCTGACACTGCTTGAATACACTGAG
m5C	chr17:53757481(-)	BS-Seq (High)	Human	RPS2P48,AC034268.2	rs903261622	chr17:53757481..53757481	dbSNP153	RBP 4 miRNA 1		CAGCGCACCAGGTTCAAGGCGTTTGTTGCTATCGGGGACTACAATGGCCACGTCGGCCTGGGTGT	CAGCGCACCAGGTTCAAGGCGTTTGTTGCTATTGGGGACTACAATGGCCACGTCGGCCTGGGTGT
m5C	chr17:53757481(-)	BS-Seq (High)	Human	RPS2P48,AC034268.2	rs903261622	chr17:53757481..53757481	dbSNP153	RBP 4 miRNA 1		CAGCGCACCAGGTTCAAGGCGTTTGTTGCTATCGGGGACTACAATGGCCACGTCGGCCTGGGTGT	CAGCGCACCAGGTTCAAGGCGTTTGTTGCTATGGGGGACTACAATGGCCACGTCGGCCTGGGTGT
m5C	chr17:62478450(-)	BS-Seq (High)	Human	lnc-MARCH10-8,lnc-MARCH10-8:2,lnc-MARCH10-8:3,lnc-MARCH10-8:4	rs926375951	chr17:62478450..62478450	dbSNP153			GCCCGGAGGACCCGCCGCCGCCTTTGTGTCGCCGGCCCCCGCCCCGCTGGACTGGCCCGGGCCGG	GCCCGGAGGACCCGCCGCCGCCTTTGTGTCGCTGGCCCCCGCCCCGCTGGACTGGCCCGGGCCGG
m5C	chr17:76563928(+)	BS-Seq (High)	Human	SNHG16	rs1441899747	chr17:76563928..76563928	dbSNP153	circRNA 8		TGGCTCAGCCTCCTGAGTGCTGGGACTACAGGCGCGTACCTTCTTTAGTAGAGACTGGGTTTCAC	TGGCTCAGCCTCCTGAGTGCTGGGACTACAGGTGCGTACCTTCTTTAGTAGAGACTGGGTTTCAC
m5C	chr17:76564185(+)	BS-Seq (High)	Human	SNHG16	rs867990202	chr17:76564185..76564185	dbSNP153	RBP 21 circRNA 8		ACAGTCTTGCTCTGTCACCCAGGCTGGGAGTGCAGTGGCATGATCTCTGCAACCTCTACCTCCCA	ACAGTCTTGCTCTGTCACCCAGGCTGGGAGTGAAGTGGCATGATCTCTGCAACCTCTACCTCCCA
m5C	chr17:79755211(-)	BS-Seq (High)	Human	HSALNG0119124	rs145103015	chr17:79755211..79755211	dbSNP153			CACCCACCTTGGCCTCCCAAAGTGCTGGGAGGCGTGAGCCACCACGCGTGGCCTTGAGATGGGAT	CACCCACCTTGGCCTCCCAAAGTGCTGGGAGGTGTGAGCCACCACGCGTGGCCTTGAGATGGGAT
m5C	chr17:79755230(-)	BS-Seq (High)	Human	HSALNG0119124	rs782410333	chr17:79755230..79755230	dbSNP153			CTCTTGACCTCGAGTGATCCACCCACCTTGGCCTCCCAAAGTGCTGGGAGGCGTGAGCCACCACG	CTCTTGACCTCGAGTGATCCACCCACCTTGGCTTCCCAAAGTGCTGGGAGGCGTGAGCCACCACG
m5C	chr17:79755416(-)	BS-Seq (High)	Human	HSALNG0119124	rs898811644	chr17:79755416..79755416	dbSNP153			GCCCAGGCTGGAGTGCAGTGGCGTGATCTTGGCTCACAGCAACCTCCACCTGCTGGGTTCAAGCA	GCCCAGGCTGGAGTGCAGTGGCGTGATCTTGGGTCACAGCAACCTCCACCTGCTGGGTTCAAGCA
m5C	chr17:79755427(-)	BS-Seq (High)	Human	HSALNG0119124	rs145559702	chr17:79755427..79755427	dbSNP153			TCACTCTTGTCGCCCAGGCTGGAGTGCAGTGGCGTGATCTTGGCTCACAGCAACCTCCACCTGCT	TCACTCTTGTCGCCCAGGCTGGAGTGCAGTGGTGTGATCTTGGCTCACAGCAACCTCCACCTGCT
m5C	chr17:80352976(-)	BS-Seq (High)	Human	RNF213-AS1	rs138770190	chr17:80352976..80352976	dbSNP153			GCCTGGTCACATCAGAAACCATGAGGGTGGATCTCCGGAGGTCATCGATGTGGACAGACTGCCAC	GCCTGGTCACATCAGAAACCATGAGGGTGGATTTCCGGAGGTCATCGATGTGGACAGACTGCCAC
m5C	chr17:80353555(-)	BS-Seq (High)	Human	RNF213-AS1	rs763836806	chr17:80353555..80353555	dbSNP153	RBP 1		GCCACCTCCCCTGATGTGCTGGCCTCCGTCTCCATCGCCTCCTCATGGCCGTCTTCCGCCCGGTG	GCCACCTCCCCTGATGTGCTGGCCTCCGTCTCTATCGCCTCCTCATGGCCGTCTTCCGCCCGGTG
m5C	chr17:80372692(-)	BS-Seq (High)	Human	RNF213-AS1	rs774027708	chr17:80372692..80372692	dbSNP153			CTCAGGCTCCGAGAGGAAATCTGCAGCTCTGTCGAGGCAGAGGCGGATCCGGGCCACCTCTTGCA	CTCAGGCTCCGAGAGGAAATCTGCAGCTCTGTTGAGGCAGAGGCGGATCCGGGCCACCTCTTGCA
m5C	chr17:80372692(-)	BS-Seq (High)	Human	RNF213-AS1	rs774027708	chr17:80372692..80372692	dbSNP153			CTCAGGCTCCGAGAGGAAATCTGCAGCTCTGTCGAGGCAGAGGCGGATCCGGGCCACCTCTTGCA	CTCAGGCTCCGAGAGGAAATCTGCAGCTCTGTGGAGGCAGAGGCGGATCCGGGCCACCTCTTGCA
m5C	chr17:80373134(-)	BS-Seq (High)	Human	RNF213-AS1	rs1174611892	chr17:80373134..80373134	dbSNP153			CCTGCTGCTTGACAACGTCCTTGGGAAACACCCACTGGTGCGGGCGGCCGGGCTTGGAGAGGCCC	CCTGCTGCTTGACAACGTCCTTGGGAAACACCGACTGGTGCGGGCGGCCGGGCTTGGAGAGGCCC
m5C	chr17:80386360(-)	BS-Seq (High)	Human	RNF213-AS1	rs146990608	chr17:80386360..80386360	dbSNP153,HGVD	RBP 2		AATTTCATTGTGTAGGCGAATCAAGTAGCTGACGAGAGCGGTAGCACAGAGGCCCAGGCCCCGTC	AATTTCATTGTGTAGGCGAATCAAGTAGCTGATGAGAGCGGTAGCACAGAGGCCCAGGCCCCGTC
m5C	chr17:80390116(-)	BS-Seq (High)	Human	RNF213-AS1	rs1568175514	chr17:80390116..80390116	dbSNP153			AGTTTCAAGATTATCATTTCGTGCAGCTCTAGCAGGAAGGCGTCTAGGCCAGTCTGATTTAGGAA	AGTTTCAAGATTATCATTTCGTGCAGCTCTAGGAGGAAGGCGTCTAGGCCAGTCTGATTTAGGAA
m5C	chr17:80390120(-)	BS-Seq (High)	Human	RNF213-AS1	rs758079303	chr17:80390120..80390120	dbSNP153			CTTTAGTTTCAAGATTATCATTTCGTGCAGCTCTAGCAGGAAGGCGTCTAGGCCAGTCTGATTTA	CTTTAGTTTCAAGATTATCATTTCGTGCAGCTGTAGCAGGAAGGCGTCTAGGCCAGTCTGATTTA
m5C	chr17:80390122(-)	BS-Seq (High)	Human	RNF213-AS1	rs142084040	chr17:80390122..80390122	dbSNP153			TTCTTTAGTTTCAAGATTATCATTTCGTGCAGCTCTAGCAGGAAGGCGTCTAGGCCAGTCTGATT	TTCTTTAGTTTCAAGATTATCATTTCGTGCAGTTCTAGCAGGAAGGCGTCTAGGCCAGTCTGATT
m5C	chr17:80883900(-)	BS-Seq (High)	Human	lnc-TMEM105-1	rs61753566	chr17:80883900..80883900	dbSNP153,HGVD			TGAGCGCTGTCCCTCACGCCGCACCACCTCGCCGAGTCGAAGTTCTGCCAGATCCTGCCGAGGCA	TGAGCGCTGTCCCTCACGCCGCACCACCTCGCTGAGTCGAAGTTCTGCCAGATCCTGCCGAGGCA
m5C	chr17:80883900(-)	BS-Seq (High)	Human	lnc-TMEM105-1	rs61753566	chr17:80883900..80883900	dbSNP153			TGAGCGCTGTCCCTCACGCCGCACCACCTCGCCGAGTCGAAGTTCTGCCAGATCCTGCCGAGGCA	TGAGCGCTGTCCCTCACGCCGCACCACCTCGCGGAGTCGAAGTTCTGCCAGATCCTGCCGAGGCA
m5C	chr17:80883900(-)	BS-Seq (High)	Human	lnc-TMEM105-1	rs61753566	chr17:80883900..80883900	dbSNP153			TGAGCGCTGTCCCTCACGCCGCACCACCTCGCCGAGTCGAAGTTCTGCCAGATCCTGCCGAGGCA	TGAGCGCTGTCCCTCACGCCGCACCACCTCGCAGAGTCGAAGTTCTGCCAGATCCTGCCGAGGCA
m5C	chr17:81381938(+)	BS-Seq (High)	Human	lnc-BAHCC1-2	rs1281574885	chr17:81381938..81381938	dbSNP153			GCGCCGCTCCCGCTCCATCCTGTCCCTTCACTCCCCTGTTGGAGAGGGTTTTCCCACAATGGCCT	GCGCCGCTCCCGCTCCATCCTGTCCCTTCACTTCCCTGTTGGAGAGGGTTTTCCCACAATGGCCT
m5C	chr17:81702251(-)	BS-Seq (High)	Human	AC139530.1	rs538224223	chr17:81702251..81702251	dbSNP153	RBP 2		TGGTAATGGGGTGCACCTGTAGTCCAGCTACTCGGGAGGCTGAGGCCCGAGAATCGCTTGAACCC	TGGTAATGGGGTGCACCTGTAGTCCAGCTACTTGGGAGGCTGAGGCCCGAGAATCGCTTGAACCC
m5C	chr17:81928141(+)	BS-Seq (High)	Human	MAFG-DT	rs377051722	chr17:81928141..81928141	dbSNP153			GGCGCTCTTGCGTCAGGACGGCGCCGCCGGGGCCCCGCGATTCCAACTCGGGGGTCCCGGAGCGG	GGCGCTCTTGCGTCAGGACGGCGCCGCCGGGGGCCCGCGATTCCAACTCGGGGGTCCCGGAGCGG
m5C	chr17:81928164(+)	BS-Seq (High)	Human	MAFG-DT	rs1231988345	chr17:81928164..81928164	dbSNP153			CCGCCGGGGCCCCGCGATTCCAACTCGGGGGTCCCGGAGCGGCGCGGGGCGGGGACGGCCTGGCA	CCGCCGGGGCCCCGCGATTCCAACTCGGGGGTACCGGAGCGGCGCGGGGCGGGGACGGCCTGGCA
m5C	chr17:1655517(+)	BS-Seq (High)	Human	NONHSAG020469.2	rs1329037168	chr17:1655517..1655517	dbSNP153			TTTGCCCGATCGTTGTTCACATGTAGGGCACGCAGAATCAGGATGAGACGGGAGAAGGCCTGGGA	TTTGCCCGATCGTTGTTCACATGTAGGGCACGTAGAATCAGGATGAGACGGGAGAAGGCCTGGGA
m5C	chr17:1712629(-)	BS-Seq (High)	Human	MIR22HG	rs911164056	chr17:1712629..1712629	dbSNP153	RBP 2 Splice 1		CTTCACTGGCCACAGCATCTCCCTCCAGCCCTCGCTATGTGCCTCTGCCATCTTCACCCATCATG	CTTCACTGGCCACAGCATCTCCCTCCAGCCCTTGCTATGTGCCTCTGCCATCTTCACCCATCATG
m5C	chr17:3726848(+)	BS-Seq (High)	Human	lnc-HASPIN-2	rs1398281889	chr17:3726848..3726848	dbSNP153			CCCGGGTTCAAGCAATTCTCCTACCTCAGCCTCCCGAGTAGCTGGGATTGCAGGCATACACCACC	CCCGGGTTCAAGCAATTCTCCTACCTCAGCCTGCCGAGTAGCTGGGATTGCAGGCATACACCACC
m5C	chr17:7342043(-)	BS-Seq (High)	Human	lnc-NEURL4-3	rs776007312	chr17:7342043..7342043	dbSNP153			CCGCATACCGCCATCATGGGCTCTGGTGGACCCAGGCGGGCCAGGTCACAAATGCCGACAACGAA	CCGCATACCGCCATCATGGGCTCTGGTGGACCTAGGCGGGCCAGGTCACAAATGCCGACAACGAA
m5C	chr17:7342043(-)	BS-Seq (High)	Human	lnc-NEURL4-3	rs776007312	chr17:7342043..7342043	dbSNP153			CCGCATACCGCCATCATGGGCTCTGGTGGACCCAGGCGGGCCAGGTCACAAATGCCGACAACGAA	CCGCATACCGCCATCATGGGCTCTGGTGGACCGAGGCGGGCCAGGTCACAAATGCCGACAACGAA
m5C	chr17:7577562(+)	BS-Seq (High)	Human	SENP3-EIF4A1,EIF4A1,AC016876.3	rs776802273	chr17:7577562..7577562	dbSNP153	RBP 9 circRNA 28		GGTATAGCCCCTGACTGATTTTTGTCCCCCAACCTCCAGGAGTGGAAGCTGGACACACTATGTGA	GGTATAGCCCCTGACTGATTTTTGTCCCCCAAACTCCAGGAGTGGAAGCTGGACACACTATGTGA
m5C	chr17:7577562(+)	BS-Seq (High)	Human	SENP3-EIF4A1,EIF4A1,AC016876.3	rs776802273	chr17:7577562..7577562	dbSNP153	RBP 9 circRNA 28		GGTATAGCCCCTGACTGATTTTTGTCCCCCAACCTCCAGGAGTGGAAGCTGGACACACTATGTGA	GGTATAGCCCCTGACTGATTTTTGTCCCCCAATCTCCAGGAGTGGAAGCTGGACACACTATGTGA
m5C	chr17:7577565(+)	BS-Seq (High)	Human	SENP3-EIF4A1,EIF4A1,AC016876.3	rs368569884	chr17:7577565..7577565	dbSNP153	RBP 7 circRNA 28		ATAGCCCCTGACTGATTTTTGTCCCCCAACCTCCAGGAGTGGAAGCTGGACACACTATGTGACTT	ATAGCCCCTGACTGATTTTTGTCCCCCAACCTTCAGGAGTGGAAGCTGGACACACTATGTGACTT
m5C	chr17:31034550(-)	BS-Seq (High)	Human	lnc-TEFM-10	rs547789179	chr17:31034550..31034550	dbSNP153			AGTAAACCGCTAGCTTGTTGCACTGTGGAGGCCACAGGAGCAGAAACATGGAATGCCAGATGCTG	AGTAAACCGCTAGCTTGTTGCACTGTGGAGGCGACAGGAGCAGAAACATGGAATGCCAGATGCTG
m5C	chr17:35574024(+)	BS-Seq (High)	Human	SNHG30	rs764332650	chr17:35574024..35574024	dbSNP153			AGGCACAGTGGTTCACGCCTGTAATCCCAGCACTTTGGGAGGCCAAGGCAGGCGGATCACTTGAG	AGGCACAGTGGTTCACGCCTGTAATCCCAGCAATTTGGGAGGCCAAGGCAGGCGGATCACTTGAG
m5C	chr17:35574044(+)	BS-Seq (High)	Human	SNHG30	rs754159462	chr17:35574044..35574044	dbSNP153			GTAATCCCAGCACTTTGGGAGGCCAAGGCAGGCGGATCACTTGAGGTCAGGAGTTCGACACCAGC	GTAATCCCAGCACTTTGGGAGGCCAAGGCAGGTGGATCACTTGAGGTCAGGAGTTCGACACCAGC
m5C	chr17:37442221(-)	miCLIP (High)	Human	lnc-HNF1B-3	rs1356130832	chr17:37442220..37442221	dbSNP153			CTTCAATTTACAAAACTCATCCAACTGAGAGGCAAAAAAAAAAAAAAAAAAAAAAGACGGGAAAA	CTTCAATTTACAAAACTCATCCAACTGAGAGG_AAAAAAAAAAAAAAAAAAAAAAGACGGGAAAA
m5C	chr17:37442221(-)	miCLIP (High)	Human	lnc-HNF1B-3	rs1478303996	chr17:37442221..37442221	dbSNP153			CTTCAATTTACAAAACTCATCCAACTGAGAGGCAAAAAAAAAAAAAAAAAAAAAAGACGGGAAAA	CTTCAATTTACAAAACTCATCCAACTGAGAGGAAAAAAAAAAAAAAAAAAAAAAAGACGGGAAAA
m5C	chr17:38702535(+)	BS-Seq (High)	Human	AC006449.7	rs1051578745	chr17:38702520..38702535	dbSNP153	RBP 4		AAGGTGCGGGAAGCGGGAAGCAGGAGCGGGAGCGCGCGGCCCTGGCACGCATAGGGCGGCGGAGA	AAGGTGCGGGAAGCGGGA_______________GCGCGGCCCTGGCACGCATAGGGCGGCGGAGA
m5C	chr17:40443621(-)	BS-Seq (High)	Human	lnc-TNS4-4	rs1159687296	chr17:40443621..40443621	dbSNP153			ACGGCGGCAGCGCCTGGCGCTCCTGGAGGACCCGACCCGGAGGGCGCGGGGAGACGGGGCGGCCC	ACGGCGGCAGCGCCTGGCGCTCCTGGAGGACCTGACCCGGAGGGCGCGGGGAGACGGGGCGGCCC
m5C	chr17:42540564(+)	BS-Seq (High)	Human	AC067852.1,NAGLU	rs559843148	chr17:42540564..42540564	dbSNP153	circRNA 6		TAAAAATACAAAAAATTAGCCGGGTGTGGTGGCGGGCACCTGTAGTCCCAGCTACTAGGGAGGCT	TAAAAATACAAAAAATTAGCCGGGTGTGGTGGTGGGCACCTGTAGTCCCAGCTACTAGGGAGGCT
m5C	chr17:42543658(+)	BS-Seq (High)	Human	AC067852.1,NAGLU	rs1250357905	chr17:42543658..42543658	dbSNP153	RBP 4 circRNA 8		GCGGCTGCTGCTCACATCTGCTCCCTCCCTGGCCACCAGCCCCGCCTTCCGCTACGACCTGCTGG	GCGGCTGCTGCTCACATCTGCTCCCTCCCTGGTCACCAGCCCCGCCTTCCGCTACGACCTGCTGG
m5C	chr17:42543661(+)	BS-Seq (High)	Human	AC067852.1,NAGLU	rs370718304	chr17:42543661..42543661	dbSNP153	RBP 4 circRNA 8		GCTGCTGCTCACATCTGCTCCCTCCCTGGCCACCAGCCCCGCCTTCCGCTACGACCTGCTGGACC	GCTGCTGCTCACATCTGCTCCCTCCCTGGCCATCAGCCCCGCCTTCCGCTACGACCTGCTGGACC
m5C	chr17:42543665(+)	BS-Seq (High)	Human	AC067852.1,NAGLU	rs1469759141	chr17:42543665..42543665	dbSNP153	RBP 3 circRNA 8		CTGCTCACATCTGCTCCCTCCCTGGCCACCAGCCCCGCCTTCCGCTACGACCTGCTGGACCTCAC	CTGCTCACATCTGCTCCCTCCCTGGCCACCAGACCCGCCTTCCGCTACGACCTGCTGGACCTCAC
m5C	chr17:42543666(+)	BS-Seq (High)	Human	AC067852.1,NAGLU	rs1049965915	chr17:42543666..42543666	dbSNP153	RBP 3 circRNA 8		TGCTCACATCTGCTCCCTCCCTGGCCACCAGCCCCGCCTTCCGCTACGACCTGCTGGACCTCACT	TGCTCACATCTGCTCCCTCCCTGGCCACCAGCTCCGCCTTCCGCTACGACCTGCTGGACCTCACT
m5C	chr17:42543667(+)	BS-Seq (High)	Human	AC067852.1,NAGLU	rs1166458645	chr17:42543667..42543667	dbSNP153	RBP 3 circRNA 8		GCTCACATCTGCTCCCTCCCTGGCCACCAGCCCCGCCTTCCGCTACGACCTGCTGGACCTCACTC	GCTCACATCTGCTCCCTCCCTGGCCACCAGCCTCGCCTTCCGCTACGACCTGCTGGACCTCACTC
m5C	chr17:42543997(+)	BS-Seq (High)	Human	AC067852.1,NAGLU	rs746006696	chr17:42543997..42543997	dbSNP153	RBP 2 circRNA 8	Clinvar_Rec_997GWAS_ID_16179	CAACATCCTGGACTATGCCAACAAGCAGCTGGCGGGGTTGGTGGCCAACTACTACACCCCTCGCT	CAACATCCTGGACTATGCCAACAAGCAGCTGGTGGGGTTGGTGGCCAACTACTACACCCCTCGCT
m5C	chr17:43125322(+)	BS-Seq (High)	Human	lnc-LINC00854-1-001	rs1402792661	chr17:43125322..43125322	dbSNP153			TGAAGGCCTCCTGAGCGCAGGGGCCCAGTTATCTGAGAAACCCCACAGCCTGTCCCCCGTCCAGG	TGAAGGCCTCCTGAGCGCAGGGGCCCAGTTATTTGAGAAACCCCACAGCCTGTCCCCCGTCCAGG
m5C	chr17:43169282(-)	BS-Seq (High)	Human	AC060780.1,BRCA1	rs1183929403	chr17:43169282..43169282	dbSNP153	circRNA 2		CGCCAGCTACTCAGGAGCTGAGGCAGGAGAATCGCTTGAACCCAGGAGGCGGAGGTTGCAGTGAG	CGCCAGCTACTCAGGAGCTGAGGCAGGAGAATAGCTTGAACCCAGGAGGCGGAGGTTGCAGTGAG
m5C	chr17:43169291(-)	BS-Seq (High)	Human	AC060780.1,BRCA1	rs1227635262	chr17:43169291..43169291	dbSNP153	circRNA 2		GGTGGCGCGCGCCAGCTACTCAGGAGCTGAGGCAGGAGAATCGCTTGAACCCAGGAGGCGGAGGT	GGTGGCGCGCGCCAGCTACTCAGGAGCTGAGGTAGGAGAATCGCTTGAACCCAGGAGGCGGAGGT
m5C	chr17:1655517(+)	BS-Seq (High)	Human	NONHSAG020469.2	-	chr17:1655517..1655517	ICGC			TTTGCCCGATCGTTGTTCACATGTAGGGCACGCAGAATCAGGATGAGACGGGAGAAGGCCTGGGA	TTTGCCCGATCGTTGTTCACATGTAGGGCACGAAGAATCAGGATGAGACGGGAGAAGGCCTGGGA
m5C	chr17:69020510(+)	BS-Seq (High)	Human	ABCA9-AS1	-	chr17:69020510..69020510	TCGA,ICGC,COSMIC	Splice 3		CTGATTGTTTTCCTTGTTTCGTGGAAGGAAGACAAAACTTGTTCCAGCTCAACAAGGCTTCCTAT	CTGATTGTTTTCCTTGTTTCGTGGAAGGAAGAGAAAACTTGTTCCAGCTCAACAAGGCTTCCTAT
m5C	chr17:80390120(-)	BS-Seq (High)	Human	RNF213-AS1	rs758079303	chr17:80390120..80390120	COSMIC			CTTTAGTTTCAAGATTATCATTTCGTGCAGCTCTAGCAGGAAGGCGTCTAGGCCAGTCTGATTTA	CTTTAGTTTCAAGATTATCATTTCGTGCAGCTGTAGCAGGAAGGCGTCTAGGCCAGTCTGATTTA
m5C	chr17:3726937(+)	BS-Seq (High)	Human	lnc-HASPIN-2	-	chr17:3726937..3726937	ICGC			TTTTAGTAGAGATGGGGGTTTCACCATGTTGGCCAGGCTGGTCTCGAACTCCTCACCTTGTGATC	TTTTAGTAGAGATGGGGGTTTCACCATGTTGGTCAGGCTGGTCTCGAACTCCTCACCTTGTGATC
m5C	chr17:43493023(-)	BS-Seq (High)	Human	lnc-LINC00854-1-001	-	chr17:43493023..43493023	ICGC			AGCACCAGTCATTACCTTAGTCCTTCCAGCTGCACAAAGCAACCAAACTGCATGATGCTGGTAAC	AGCACCAGTCATTACCTTAGTCCTTCCAGCTGAACAAAGCAACCAAACTGCATGATGCTGGTAAC
m5C	chr17:37442221(-)	miCLIP (High)	Human	lnc-HNF1B-3	rs1356130832	chr17:37442220..37442221	ICGC			CTTCAATTTACAAAACTCATCCAACTGAGAGGCAAAAAAAAAAAAAAAAAAAAAAGACGGGAAAA	CTTCAATTTACAAAACTCATCCAACTGAGAGG_AAAAAAAAAAAAAAAAAAAAAAGACGGGAAAA
m5C	chr17:80372687(-)	BS-Seq (High)	Human	RNF213-AS1	-	chr17:80372687..80372687	ICGC			GCTCCGAGAGGAAATCTGCAGCTCTGTCGAGGCAGAGGCGGATCCGGGCCACCTCTTGCAGGTAT	GCTCCGAGAGGAAATCTGCAGCTCTGTCGAGGTAGAGGCGGATCCGGGCCACCTCTTGCAGGTAT
m5C	chr17:53757221(-)	BS-Seq (High)	Human	RPS2P48,AC034268.2	-	chr17:53757221..53757221	ICGC			CGCACCTGTGCCCAAGAAGCTGCTCATGATAGCTGGTATCGATGACTGCTACACCTCAGCCCGGG	CGCACCTGTGCCCAAGAAGCTGCTCATGATAGTTGGTATCGATGACTGCTACACCTCAGCCCGGG
m5C	chr17:16439381(+)	BS-Seq (High)	Human	SNHG29	-	chr17:16439381..16439381	TCGA,ICGC	RBP 14 Splice 21 circRNA 2		AGTCTGCGAAGGCCGGGACCCGGTTCCCCGGCCCACAGTGGGGGTGTGCAAACCCGAGAGAACTG	AGTCTGCGAAGGCCGGGACCCGGTTCCCCGGCTCACAGTGGGGGTGTGCAAACCCGAGAGAACTG
m5C	chr17:29572560(+)	BS-Seq (High)	Human	TP53I13,ABHD15-AS1	-	chr17:29572560..29572560	TCGA,ICGC,COSMIC	RBP 1 miRNA 2 circRNA 2		CCGGGGCCCCACCCCACGCACTGAAGAGGCCGCCTGGGCTGCCATGGCCCTGACCTTCCTGCTGG	CCGGGGCCCCACCCCACGCACTGAAGAGGCCGTCTGGGCTGCCATGGCCCTGACCTTCCTGCTGG
m5C	chr17:80883900(-)	BS-Seq (High)	Human	lnc-TMEM105-1	rs61753566	chr17:80883900..80883900	ICGC			TGAGCGCTGTCCCTCACGCCGCACCACCTCGCCGAGTCGAAGTTCTGCCAGATCCTGCCGAGGCA	TGAGCGCTGTCCCTCACGCCGCACCACCTCGCTGAGTCGAAGTTCTGCCAGATCCTGCCGAGGCA
m5C	chr17:29572569(+)	BS-Seq (High)	Human	TP53I13,ABHD15-AS1	-	chr17:29572569..29572569	ICGC,COSMIC	RBP 1 miRNA 3 circRNA 2		CACCCCACGCACTGAAGAGGCCGCCTGGGCTGCCATGGCCCTGACCTTCCTGCTGGTGCTGCTCA	CACCCCACGCACTGAAGAGGCCGCCTGGGCTGTCATGGCCCTGACCTTCCTGCTGGTGCTGCTCA
m5C	chr17:21534811(-)	BS-Seq (High)	Human	LINC02693	-	chr17:21534811..21534811	ICGC	RBP 2 circRNA 1		CTTCTTCACCCCCACTCTCCTTTGAGCTCATGCCGGGTCTTTCAGACTGGCCTGAAGCATGGGTG	CTTCTTCACCCCCACTCTCCTTTGAGCTCATGTCGGGTCTTTCAGACTGGCCTGAAGCATGGGTG
m5C	chr18:32091952(+)	BS-Seq (High)	Human	RNF138,AC011825.3	rs1172579324	chr18:32091952..32091952	dbSNP153	RBP 2		CCCCGCCTCTCCTGGCTCCTCCGCCCAGATCCCCGGCGCTCCCGCGTTCGGTGACGGCCGGGTAG	CCCCGCCTCTCCTGGCTCCTCCGCCCAGATCCTCGGCGCTCCCGCGTTCGGTGACGGCCGGGTAG
m5C	chr18:32092064(+)	BS-Seq (High)	Human	RNF138,AC011825.3	rs1568218887	chr18:32092064..32092064	dbSNP153	RBP 3		GAATCTCCCTGCACCATGAGCCTCGGCTCCGGCCCCGTTAGGGGCCGATAAGCACAGCGCACGCC	GAATCTCCCTGCACCATGAGCCTCGGCTCCGGTCCCGTTAGGGGCCGATAAGCACAGCGCACGCC
m5C	chr18:32092066(+)	BS-Seq (High)	Human	RNF138,AC011825.3	rs1406492670	chr18:32092066..32092066	dbSNP153	RBP 3		ATCTCCCTGCACCATGAGCCTCGGCTCCGGCCCCGTTAGGGGCCGATAAGCACAGCGCACGCCGC	ATCTCCCTGCACCATGAGCCTCGGCTCCGGCCTCGTTAGGGGCCGATAAGCACAGCGCACGCCGC
m5C	chr18:32092076(+)	BS-Seq (High)	Human	RNF138,AC011825.3	rs1468824596	chr18:32092076..32092076	dbSNP153	RBP 2		ACCATGAGCCTCGGCTCCGGCCCCGTTAGGGGCCGATAAGCACAGCGCACGCCGCCCTCCATTTG	ACCATGAGCCTCGGCTCCGGCCCCGTTAGGGGTCGATAAGCACAGCGCACGCCGCCCTCCATTTG
m5C	chr19:15119256(+)	BS-Seq (High)	Human	lnc-OR7C2-1,lnc-OR7C2-1:2	rs757075562	chr19:15119256..15119256	dbSNP153			GAGGGGGTGGTTGCGGCCTAACAGCCCCCGTGCCATCCCTCCAAGGAAGCAGGGAACACCCAAGG	GAGGGGGTGGTTGCGGCCTAACAGCCCCCGTGACATCCCTCCAAGGAAGCAGGGAACACCCAAGG
m5C	chr19:27805798(+)	BS-Seq (High)	Human	AC006504.5	rs1289776074	chr19:27805798..27805798	dbSNP153	RBP 2 Splice 2 circRNA 2		TTGCCTGGTTCCAGCCCTGCTTCAGCACGGGGCCTGTGGGGCCCCGGTAAGTCCCGGTGTTCCCG	TTGCCTGGTTCCAGCCCTGCTTCAGCACGGGGTCTGTGGGGCCCCGGTAAGTCCCGGTGTTCCCG
m5C	chr19:27805807(+)	BS-Seq (High)	Human	AC006504.5	rs1380927133	chr19:27805807..27805807	dbSNP153	RBP 1 Splice 2 circRNA 2		TCCAGCCCTGCTTCAGCACGGGGCCTGTGGGGCCCCGGTAAGTCCCGGTGTTCCCGCACAATCTC	TCCAGCCCTGCTTCAGCACGGGGCCTGTGGGGTCCCGGTAAGTCCCGGTGTTCCCGCACAATCTC
m5C	chr19:27805808(+)	BS-Seq (High)	Human	AC006504.5	rs1302951397	chr19:27805808..27805808	dbSNP153	RBP 1 Splice 2 circRNA 2		CCAGCCCTGCTTCAGCACGGGGCCTGTGGGGCCCCGGTAAGTCCCGGTGTTCCCGCACAATCTCC	CCAGCCCTGCTTCAGCACGGGGCCTGTGGGGCGCCGGTAAGTCCCGGTGTTCCCGCACAATCTCC
m5C	chr19:45642758(+)	BS-Seq (High)	Human	EML2-AS1	rs1240987321	chr19:45642758..45642758	dbSNP153			GCCGAGGCGGGCGTATCACGAGGTCAGGAGATCGAGACCATCCTGGCCAACATGGTGAAACCCCG	GCCGAGGCGGGCGTATCACGAGGTCAGGAGATGGAGACCATCCTGGCCAACATGGTGAAACCCCG
m5C	chr19:47679449(+)	BS-Seq (High)	Human	AC010519.1,BICRA	rs1418752561	chr19:47679449..47679449	dbSNP153	RBP 4 circRNA 2		GGCTCTCCTGCGACAGGGGGCGGCGGCGGGGGCAGTGGGGGCGCTGACCAGCCCTGTGACATCCT	GGCTCTCCTGCGACAGGGGGCGGCGGCGGGGGTAGTGGGGGCGCTGACCAGCCCTGTGACATCCT
m5C	chr19:47680234(+)	BS-Seq (High)	Human	AC010519.1,BICRA	rs1192980463	chr19:47680234..47680234	dbSNP153	RBP 2 circRNA 2		GCATCGCACACCCACGCCCATCCAGCCCAAGCCCGCGGGGGTGCTGCCGCCCAAGCTCTACCAGC	GCATCGCACACCCACGCCCATCCAGCCCAAGCGCGCGGGGGTGCTGCCGCCCAAGCTCTACCAGC
m5C	chr19:47680237(+)	BS-Seq (High)	Human	AC010519.1,BICRA	rs370016692	chr19:47680237..47680237	dbSNP153	RBP 1 circRNA 2		TCGCACACCCACGCCCATCCAGCCCAAGCCCGCGGGGGTGCTGCCGCCCAAGCTCTACCAGCTGA	TCGCACACCCACGCCCATCCAGCCCAAGCCCGGGGGGGTGCTGCCGCCCAAGCTCTACCAGCTGA
m5C	chr19:47680237(+)	BS-Seq (High)	Human	AC010519.1,BICRA	rs370016692	chr19:47680237..47680237	dbSNP153	RBP 1 circRNA 2		TCGCACACCCACGCCCATCCAGCCCAAGCCCGCGGGGGTGCTGCCGCCCAAGCTCTACCAGCTGA	TCGCACACCCACGCCCATCCAGCCCAAGCCCGTGGGGGTGCTGCCGCCCAAGCTCTACCAGCTGA
m5C	chr19:47680287(+)	BS-Seq (High)	Human	AC010519.1,BICRA	rs1240563142	chr19:47680287..47680287	dbSNP153	circRNA 2		AGCTCTACCAGCTGACGCCCAAGCCGTTTGCGCCCGCGGGCGCCACGCTCACCATCCAGGGCGAG	AGCTCTACCAGCTGACGCCCAAGCCGTTTGCGTCCGCGGGCGCCACGCTCACCATCCAGGGCGAG
m5C	chr19:47680291(+)	BS-Seq (High)	Human	AC010519.1,BICRA	rs779651964	chr19:47680291..47680291	dbSNP153	circRNA 2		CTACCAGCTGACGCCCAAGCCGTTTGCGCCCGCGGGCGCCACGCTCACCATCCAGGGCGAGCCGG	CTACCAGCTGACGCCCAAGCCGTTTGCGCCCGGGGGCGCCACGCTCACCATCCAGGGCGAGCCGG
m5C	chr19:47680291(+)	BS-Seq (High)	Human	AC010519.1,BICRA	rs779651964	chr19:47680291..47680291	dbSNP153	circRNA 2		CTACCAGCTGACGCCCAAGCCGTTTGCGCCCGCGGGCGCCACGCTCACCATCCAGGGCGAGCCGG	CTACCAGCTGACGCCCAAGCCGTTTGCGCCCGTGGGCGCCACGCTCACCATCCAGGGCGAGCCGG
m5C	chr19:47680295(+)	BS-Seq (High)	Human	AC010519.1,BICRA	rs1398551218	chr19:47680295..47680295	dbSNP153	circRNA 2		CAGCTGACGCCCAAGCCGTTTGCGCCCGCGGGCGCCACGCTCACCATCCAGGGCGAGCCGGGGGC	CAGCTGACGCCCAAGCCGTTTGCGCCCGCGGGTGCCACGCTCACCATCCAGGGCGAGCCGGGGGC
m5C	chr19:47680778(+)	BS-Seq (High)	Human	AC010519.1,BICRA	rs1440144473	chr19:47680778..47680778	dbSNP153	circRNA 2		CTGGGCCCCGTGTTGGCCCCCCACTCCGGGGCCCACAGCGCGCACATCCTCTCCGCCGCTCCCAT	CTGGGCCCCGTGTTGGCCCCCCACTCCGGGGCACACAGCGCGCACATCCTCTCCGCCGCTCCCAT
m5C	chr19:47680891(+)	BS-Seq (High)	Human	AC010519.1,BICRA	rs1278742771	chr19:47680891..47680891	dbSNP153	circRNA 2		GGGCAGCCTGCCCACGCAGAGCCAGCCAGCGCCCGCCGGGCCGGCCGCCACCACTGTCCTCCAGG	GGGCAGCCTGCCCACGCAGAGCCAGCCAGCGCTCGCCGGGCCGGCCGCCACCACTGTCCTCCAGG
m5C	chr19:47680894(+)	BS-Seq (High)	Human	AC010519.1,BICRA	-	chr19:47680894..47680894	HGVD	circRNA 2		CAGCCTGCCCACGCAGAGCCAGCCAGCGCCCGCCGGGCCGGCCGCCACCACTGTCCTCCAGGGGG	CAGCCTGCCCACGCAGAGCCAGCCAGCGCCCGGCGGGCCGGCCGCCACCACTGTCCTCCAGGGGG
m5C	chr19:47694940(+)	BS-Seq (High)	Human	AC010519.1,BICRA	rs1417052176	chr19:47694939..47694940	dbSNP153	RBP 1 Splice 2 circRNA 2		CGGAATCATCCTCCAGAACAAGGCTGGGGGGGCCCCTGCCGCCCCGCAGACCTCCACCAGCCTGG	CGGAATCATCCTCCAGAACAAGGCTGGGGGGG_CCCTGCCGCCCCGCAGACCTCCACCAGCCTGG
m5C	chr19:47694940(+)	BS-Seq (High)	Human	AC010519.1,BICRA	rs776041851	chr19:47694940..47694940	dbSNP153,HGVD	RBP 1 Splice 2 circRNA 2		CGGAATCATCCTCCAGAACAAGGCTGGGGGGGCCCCTGCCGCCCCGCAGACCTCCACCAGCCTGG	CGGAATCATCCTCCAGAACAAGGCTGGGGGGGGCCCTGCCGCCCCGCAGACCTCCACCAGCCTGG
m5C	chr19:47694941(+)	BS-Seq (High)	Human	AC010519.1,BICRA	rs1350639119	chr19:47694941..47694941	dbSNP153	RBP 1 Splice 2 circRNA 2		GGAATCATCCTCCAGAACAAGGCTGGGGGGGCCCCTGCCGCCCCGCAGACCTCCACCAGCCTGGG	GGAATCATCCTCCAGAACAAGGCTGGGGGGGCTCCTGCCGCCCCGCAGACCTCCACCAGCCTGGG
m5C	chr19:54311946(-)	BS-Seq (High)	Human	LILRA5,AC245884.11	rs1317841429	chr19:54311946..54311946	dbSNP153	Splice 4		GCCAGATTCTCCATCCCATCCATGACAGAGCACCATGCAGGGAGATACCGCTGTTACTACTACAG	GCCAGATTCTCCATCCCATCCATGACAGAGCAGCATGCAGGGAGATACCGCTGTTACTACTACAG
m5C	chr19:54311946(-)	BS-Seq (High)	Human	LILRA5,AC245884.11	rs1317841429	chr19:54311946..54311946	dbSNP153	Splice 4		GCCAGATTCTCCATCCCATCCATGACAGAGCACCATGCAGGGAGATACCGCTGTTACTACTACAG	GCCAGATTCTCCATCCCATCCATGACAGAGCAACATGCAGGGAGATACCGCTGTTACTACTACAG
m5C	chr19:55047388(-)	BS-Seq (High)	Human	RDH13,AC011476.2	rs17296594	chr19:55047388..55047388	dbSNP153,HGVD	RBP 1 Splice 5 circRNA 5		ATCCATGGCTCCACCTTCTCCAGCACCACACTCGGTGAGTCCCCTCCCAGCCTGGGGTCTCCACG	ATCCATGGCTCCACCTTCTCCAGCACCACACTTGGTGAGTCCCCTCCCAGCCTGGGGTCTCCACG
m5C	chr19:55047388(-)	BS-Seq (High)	Human	RDH13,AC011476.2	rs17296594	chr19:55047388..55047388	dbSNP153	RBP 1 Splice 5 circRNA 5		ATCCATGGCTCCACCTTCTCCAGCACCACACTCGGTGAGTCCCCTCCCAGCCTGGGGTCTCCACG	ATCCATGGCTCCACCTTCTCCAGCACCACACTGGGTGAGTCCCCTCCCAGCCTGGGGTCTCCACG
m5C	chr19:55230048(-)	BS-Seq (High)	Human	AC010327.6,PPP6R1	rs1162434319	chr19:55230048..55230048	dbSNP153	RBP 16 circRNA 12		CCGGCCTTTTAGCTCAGGTCCACCATGGGGGACGGCCCAGCGTGGGTGGGGGTGCCAGAGGGTCC	CCGGCCTTTTAGCTCAGGTCCACCATGGGGGATGGCCCAGCGTGGGTGGGGGTGCCAGAGGGTCC
m5C	chr19:58406031(-)	BS-Seq (High)	Human	AC012313.1	rs1441154554	chr19:58406031..58406031	dbSNP153	RBP 1		TGCTCAATGGTGTCCAGGCTGGAGTGCAGTGGCGTGATCTCGGCTCGCTACAACCTCCACCTCCC	TGCTCAATGGTGTCCAGGCTGGAGTGCAGTGGTGTGATCTCGGCTCGCTACAACCTCCACCTCCC
m5C	chr19:58406758(-)	BS-Seq (High)	Human	AC012313.1	rs1232312689	chr19:58406758..58406758	dbSNP153	RBP 4 Splice 1 miRNA 1		ACCTGTTCATTCCCCCACAGGATTGCCCTTTACAGTTCATGAGTTCCCCCAACTGGAGTGCAGAC	ACCTGTTCATTCCCCCACAGGATTGCCCTTTAAAGTTCATGAGTTCCCCCAACTGGAGTGCAGAC
m5C	chr19:58582501(+)	BS-Seq (High)	Human	CENPBD1P1,AC016629.3	rs1329308594	chr19:58582501..58582501	dbSNP153	RBP 2 circRNA 2		ACGCCATTCTCCTGCCTCAGCCTCCCAGGTAGCTGGGACTACAGGCGCCCGCCACCACGCCCGGC	ACGCCATTCTCCTGCCTCAGCCTCCCAGGTAGTTGGGACTACAGGCGCCCGCCACCACGCCCGGC
m5C	chr19:58582507(+)	BS-Seq (High)	Human	CENPBD1P1,AC016629.3	rs1236485161	chr19:58582507..58582507	dbSNP153	RBP 2 circRNA 2		TTCTCCTGCCTCAGCCTCCCAGGTAGCTGGGACTACAGGCGCCCGCCACCACGCCCGGCTAATTT	TTCTCCTGCCTCAGCCTCCCAGGTAGCTGGGAGTACAGGCGCCCGCCACCACGCCCGGCTAATTT
m5C	chr19:58582510(+)	BS-Seq (High)	Human	CENPBD1P1,AC016629.3	rs1452158714	chr19:58582510..58582510	dbSNP153	RBP 2 circRNA 2		TCCTGCCTCAGCCTCCCAGGTAGCTGGGACTACAGGCGCCCGCCACCACGCCCGGCTAATTTTTT	TCCTGCCTCAGCCTCCCAGGTAGCTGGGACTATAGGCGCCCGCCACCACGCCCGGCTAATTTTTT
[truncated: 165 more rows]

## Sheet: m5U
Modification Type	Chromosome Position	Source	Species	Gene	Genetic Variant(s)	SNP Position	Database	Transcriptome Regulation	Disease	Nucleotide Ref Seq	Nucleotide Alt Seq
[truncated: 267 more rows]

[truncated: 1 more sheets: inosine]
