# Supplementary material for: A single natural RNA modification can destabilize a U•A-T-rich RNA•DNA-DNA triple helix
Source: RNA. 2022 Sep;28(9):1172–84. doi: 10.1261/rna.079244.122 (PMC9380742; doi:10.1261/rna.079244.122)
Supplement: Supplemental Material [file supp_079244.122_Supplemental_File_S2_Triplexator_Results.xlsx]

## Sheet: AC068025.2 (TAOK1)
TFO start	TFO end	Duplex-ID	TTS start	TTS end	Score	Error-rate	Errors	Motif	Strand	Orientation	Guanine-rate
no predicted sites

## Sheet: AL157886.1
TFO start	TFO end	Duplex-ID	TTS start	TTS end	Score	Error-rate	Errors	Motif	Strand	Orientation	Guanine-rate
0	21	GXP_4286	406	427	20	0.048	d6	Y	-	P	0.14
0	22	GXP_4501	744	766	21	0.045	d14	Y	+	P	0.14
0	22	GXP_9787968	125	147	21	0.045	d14	Y	+	P	0.14
0	22	GXP_9782609	464	486	21	0.045	t14	Y	+	P	0.14
0	22	GXP_3681404	238	260	21	0.045	t16	Y	-	P	0.18
0	20	GXP_8996681	545	565	19	0.05	t3	Y	-	P	0.15
0	22	GXP_5122868	109	131	21	0.045	d20	Y	+	P	0.18
0	21	GXP_2050877	947	968	20	0.048	t2	Y	-	P	0.19
0	21	GXP_6757774	971	992	20	0.048	t16	Y	-	P	0.14
0	20	GXP_9787952	500	520	19	0.05	t9	Y	-	P	0.2
2	22	GXP_9787937	813	833	19	0.05	d6	Y	+	P	0.15
2	22	GXP_69432	1105	1125	19	0.05	t12	Y	+	P	0.15
0	22	GXP_3212759	908	930	21	0.045	t5	Y	-	P	0.14
0	21	GXP_88403	433	454	20	0.048	t6	Y	-	P	0.14
0	22	GXP_4417964	145	167	21	0.045	t16	Y	+	P	0.14
0	22	GXP_88581	1049	1071	21	0.045	t14	Y	+	P	0.14
0	21	GXP_5127108	105	126	20	0.048	t18	Y	+	P	0.19
0	22	GXP_91089	932	954	21	0.045	t16	Y	+	P	0.14
0	20	GXP_3662069	772	792	19	0.05	t10	Y	-	P	0.2
1	21	GXP_93424	674	694	19	0.05	t9	Y	+	P	0.2
0	22	GXP_2257174	632	654	21	0.045	t2	Y	+	P	0.18
0	22	GXP_3219257	121	143	21	0.045	t2	Y	+	P	0.18
0	22	GXP_4438505	399	421	21	0.045	t2	Y	+	P	0.18
0	21	GXP_3171780	452	473	20	0.048	t9	Y	+	P	0.19
0	20	GXP_9774702	296	316	19	0.05	t9	Y	-	P	0.2
0	20	GXP_116413	415	435	19	0.05	t16	Y	+	P	0.15
0	22	GXP_9779975	500	522	21	0.045	t5	Y	-	P	0.14
1	21	GXP_124352	0	20	19	0.05	t16	Y	-	P	0.15
0	22	GXP_3183052	293	315	21	0.045	t13	Y	-	P	0.14
0	19	GXP_2247014	578	597	19	0		Y	+	P	0.21
0	20	GXP_168259	623	643	19	0.05	t5	Y	-	P	0.15
0	20	GXP_6732715	623	643	19	0.05	t5	Y	-	P	0.15
0	21	GXP_9779726	852	873	20	0.048	t6	Y	-	P	0.14
0	20	GXP_9773211	493	513	19	0.05	d15	Y	+	P	0.2
0	20	GXP_9800654	1000	1020	19	0.05	t4	Y	-	P	0.2
0	21	GXP_191030	610	631	20	0.048	d8	Y	+	P	0.14
0	21	GXP_922340	610	631	20	0.048	d8	Y	+	P	0.14
0	20	GXP_9784116	525	545	19	0.05	t14	Y	+	P	0.15
0	21	GXP_8994418	34	55	20	0.048	t16	Y	+	P	0.14
0	20	GXP_208697	95	115	19	0.05	t5	Y	-	P	0.15
0	20	GXP_227493	336	356	19	0.05	t2	Y	+	P	0.2
0	20	GXP_9783425	729	749	19	0.05	t2	Y	+	P	0.2
1	22	GXP_232059	393	414	20	0.048	t3	Y	+	P	0.14
1	21	GXP_2560524	884	904	19	0.05	t15	Y	+	P	0.15
0	20	GXP_8976140	640	660	19	0.05	d15	Y	+	P	0.2
1	22	GXP_1817167	806	827	20	0.048	t18	Y	+	P	0.19
2	22	GXP_262012	614	634	19	0.05	t17	Y	-	P	0.15
0	22	GXP_6728776	750	772	21	0.045	t7	Y	-	P	0.14
1	22	GXP_277589	721	742	20	0.048	t19	Y	+	P	0.19
1	22	GXP_2057532	523	544	20	0.048	t19	Y	+	P	0.19
0	20	GXP_277735	406	426	19	0.05	t16	Y	+	P	0.15
0	20	GXP_9802231	746	766	19	0.05	t8	Y	+	P	0.15
0	20	GXP_9791823	200	220	19	0.05	t9	Y	-	P	0.2
0	20	GXP_297438	620	640	19	0.05	t11	Y	-	P	0.15
2	22	GXP_3665056	999	1019	19	0.05	t2	Y	+	P	0.15
0	21	GXP_310606	762	783	20	0.048	t14	Y	-	P	0.19
0	21	GXP_4418557	185	206	20	0.048	t4	Y	-	P	0.14
0	20	GXP_9801029	64	84	19	0.05	t3	Y	-	P	0.15
0	22	GXP_6053450	741	763	21	0.045	t2	Y	-	P	0.18
0	20	GXP_6761574	670	690	19	0.05	t3	Y	-	P	0.15
0	22	GXP_6027018	163	185	21	0.045	t3	Y	-	P	0.18
0	22	GXP_9779366	648	670	21	0.045	t3	Y	-	P	0.18
0	21	GXP_228052	160	181	20	0.048	t6	Y	-	P	0.14
0	20	GXP_6026312	836	856	19	0.05	t10	Y	+	P	0.2
0	22	GXP_6725560	561	583	21	0.045	t8	Y	+	P	0.14
1	21	GXP_3203943	110	130	19	0.05	t15	Y	+	P	0.15
2	22	GXP_5125527	287	307	19	0.05	t5	Y	-	P	0.15
0	21	GXP_2243897	341	362	20	0.048	d4	Y	+	P	0.14
2	22	GXP_9773934	716	736	19	0.05	d13	Y	-	P	0.15
0	22	GXP_3158363	225	247	21	0.045	t18	Y	+	P	0.18
0	20	GXP_3162043	967	987	19	0.05	t10	Y	+	P	0.2
1	22	GXP_3165065	971	992	20	0.048	t9	Y	+	P	0.19
0	21	GXP_3186385	91	112	20	0.048	t14	Y	+	P	0.14
1	22	GXP_3196472	991	1012	20	0.048	t3	Y	+	P	0.14
1	21	GXP_40902	201	221	20	0		Y	-	P	0.2
0	20	GXP_9799110	213	233	19	0.05	t1	Y	-	P	0.2
0	22	GXP_3203693	679	701	21	0.045	d7	Y	-	P	0.14
0	20	GXP_160447	191	211	19	0.05	d4	Y	-	P	0.2
0	20	GXP_8982025	226	246	19	0.05	t3	Y	-	P	0.15
1	22	GXP_107540	175	196	20	0.048	d13	Y	-	P	0.14
0	21	GXP_80972	450	471	20	0.048	t6	Y	-	P	0.14
0	20	GXP_6762947	670	690	19	0.05	t3	Y	-	P	0.15
0	22	GXP_6730910	1546	1568	21	0.045	t7	Y	-	P	0.14
0	20	GXP_6728280	1030	1050	19	0.05	t15	Y	-	P	0.15
0	21	GXP_3657350	681	702	20	0.048	t16	Y	+	P	0.14
0	20	GXP_3185719	366	386	19	0.05	t16	Y	+	P	0.15
0	22	GXP_141943	317	339	21	0.045	t7	Y	-	P	0.14
0	21	GXP_3203562	675	696	20	0.048	t4	Y	-	P	0.14
0	21	GXP_8976859	598	619	20	0.048	d1	Y	-	P	0.19

## Sheet: LINC00940
TFO start	TFO end	Duplex-ID	TTS start	TTS end	Score	Error-rate	Errors	Motif	Strand	Orientation	Guanine-rate
1	22	GXP_51408	116	137	20	0.048	t16	Y	-	P	0.52
0	22	GXP_6063470	1305	1327	21	0.045	t5	Y	+	P	0.55
1	22	GXP_2248437	956	977	20	0.048	t2	Y	+	P	0.52
1	22	GXP_9796072	19	40	20	0.048	t2	Y	+	P	0.52
0	22	GXP_9797375	498	520	22	0		Y	-	P	0.55
1	22	GXP_3663420	60	81	20	0.048	d6	Y	-	P	0.52
2	22	GXP_9801908	219	239	19	0.05	t15	Y	+	P	0.45
2	22	GXP_6049298	996	1016	19	0.05	t3	Y	+	P	0.5
2	22	GXP_3203938	775	795	19	0.05	t13	Y	-	P	0.5
2	22	GXP_3203938	859	879	19	0.05	t13	Y	-	P	0.5
0	21	GXP_3162026	913	934	20	0.048	t5	Y	+	P	0.57
2	22	GXP_3657482	822	842	19	0.05	t4	Y	+	P	0.5
1	22	GXP_4414147	619	640	21	0		Y	+	P	0.52
1	22	GXP_6039316	812	833	20	0.048	t7	Y	+	P	0.52
1	22	GXP_4421336	980	1001	20	0.048	t6	Y	+	P	0.48
2	22	GXP_159479	926	946	19	0.05	t3	Y	+	P	0.5
1	22	GXP_9808150	812	833	20	0.048	t7	Y	+	P	0.52
1	22	GXP_9808819	812	833	20	0.048	t7	Y	+	P	0.52
1	22	GXP_9809210	812	833	20	0.048	t7	Y	+	P	0.52
1	22	GXP_9809515	812	833	20	0.048	t7	Y	+	P	0.52
1	22	GXP_9809792	812	833	20	0.048	t7	Y	+	P	0.52
1	22	GXP_9810070	812	833	20	0.048	t7	Y	+	P	0.52
1	22	GXP_9810391	812	833	20	0.048	t7	Y	+	P	0.52
1	22	GXP_9810455	812	833	20	0.048	t7	Y	+	P	0.52
